# Supplementary material for: Comparative Genomics ofCryptosporidium
Source: Hindawi journal article supplement (doi:10.1155/2013/832756), 2013-01-01

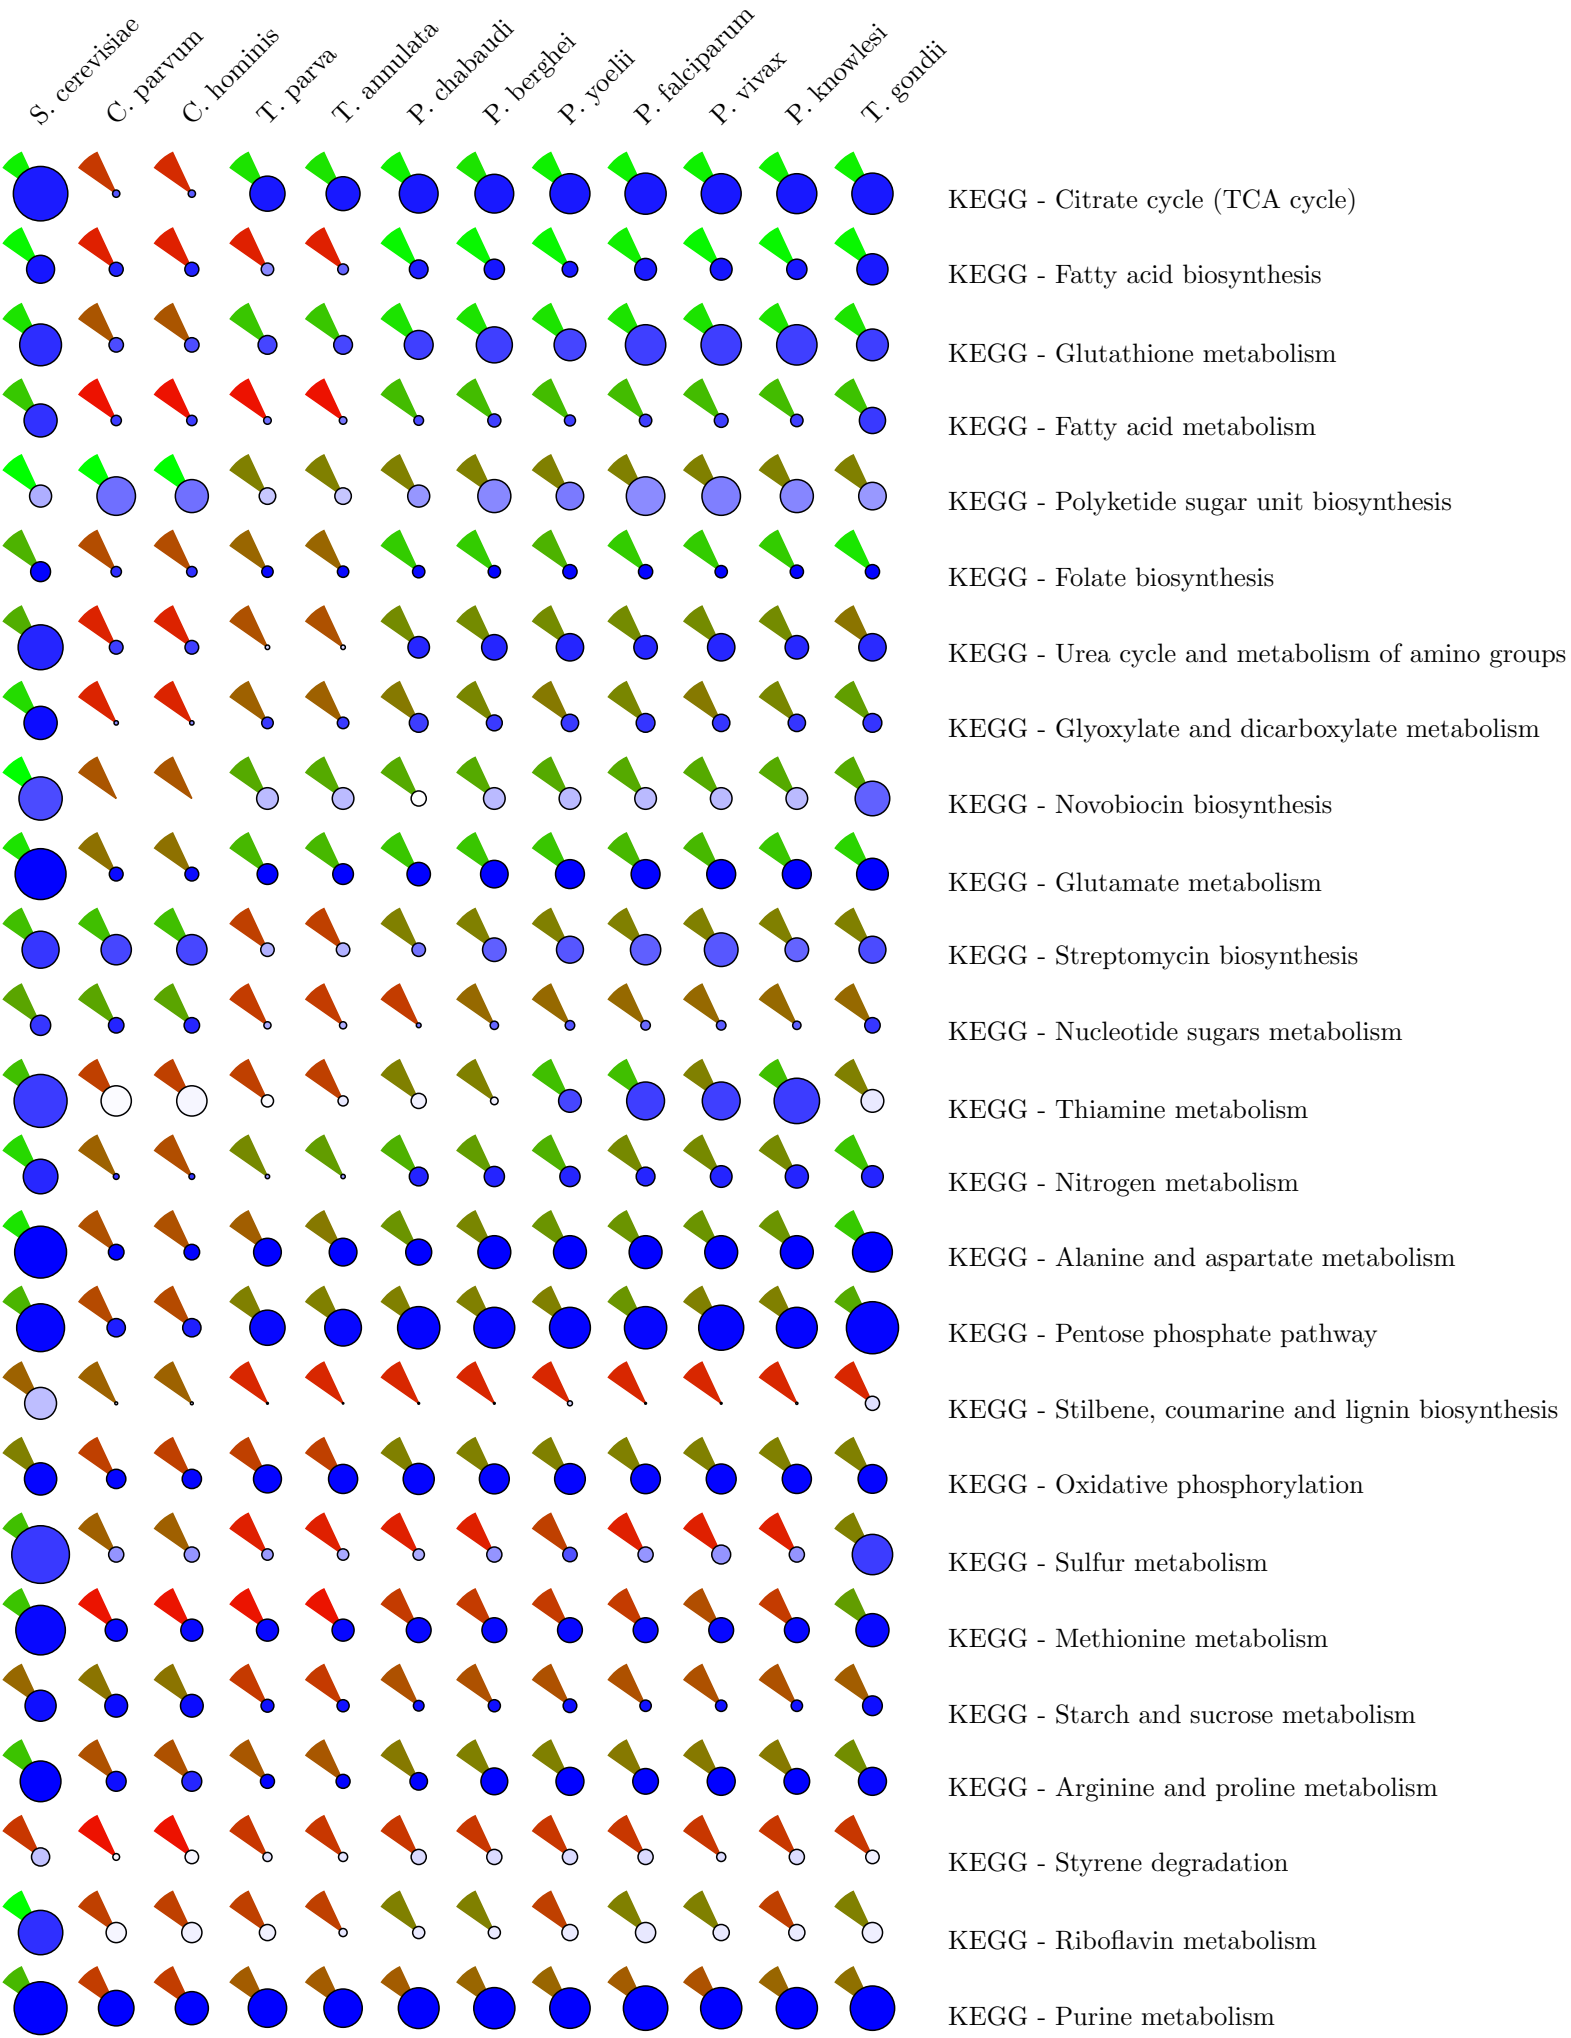

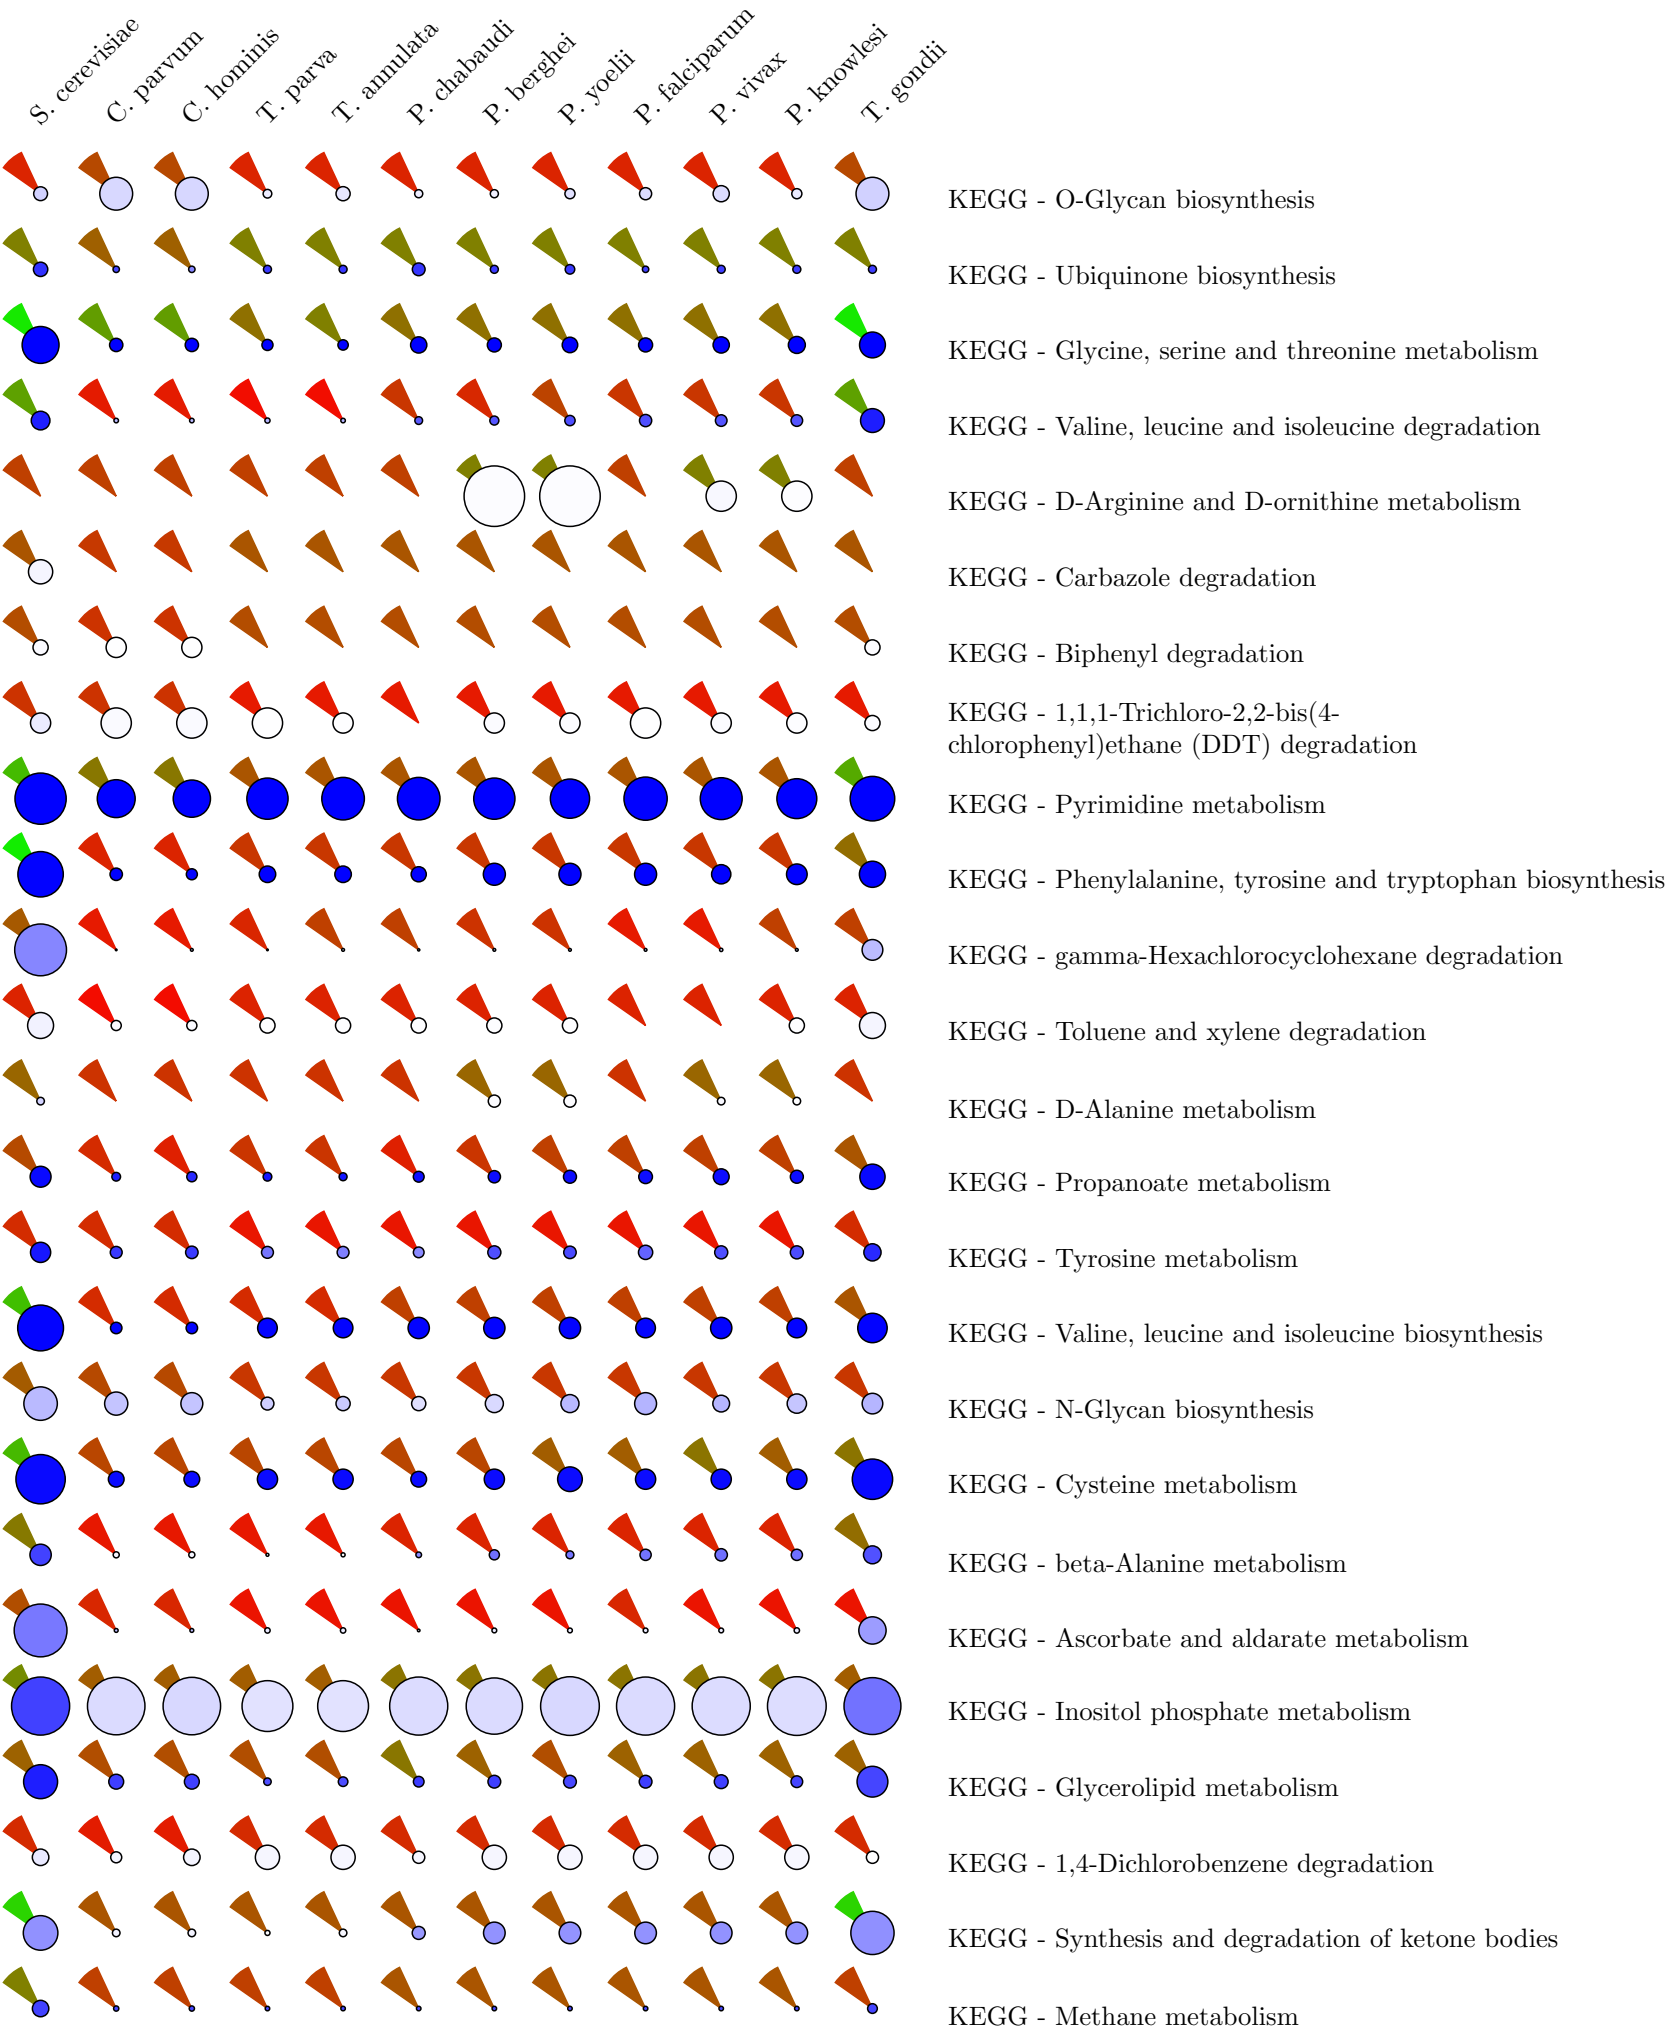

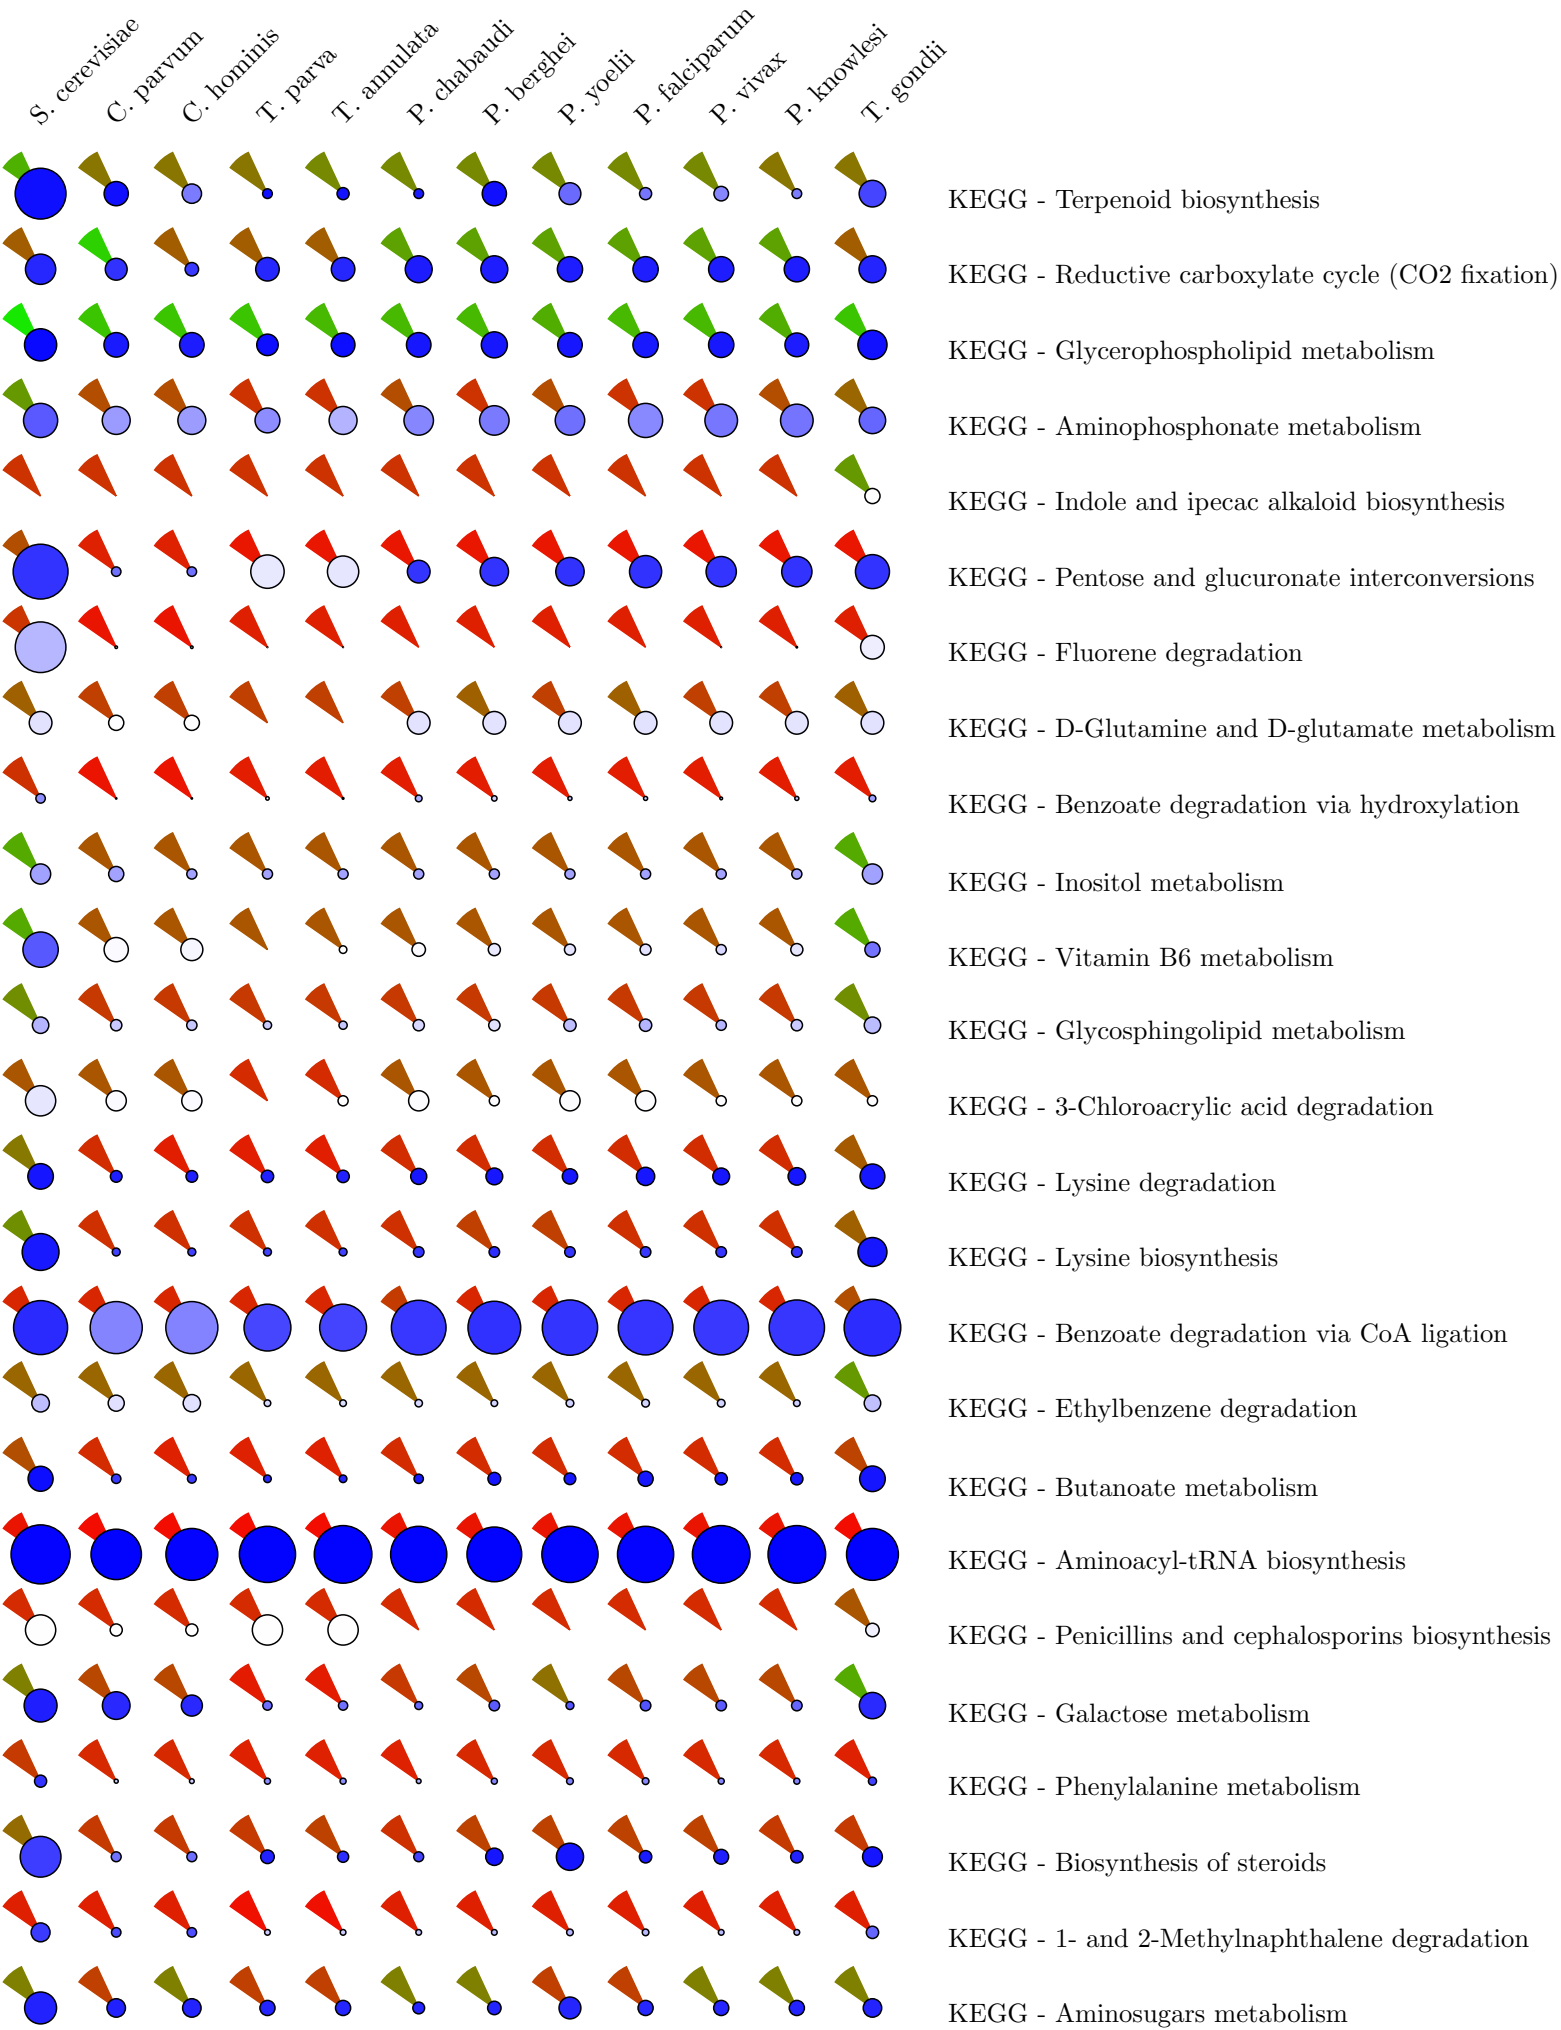

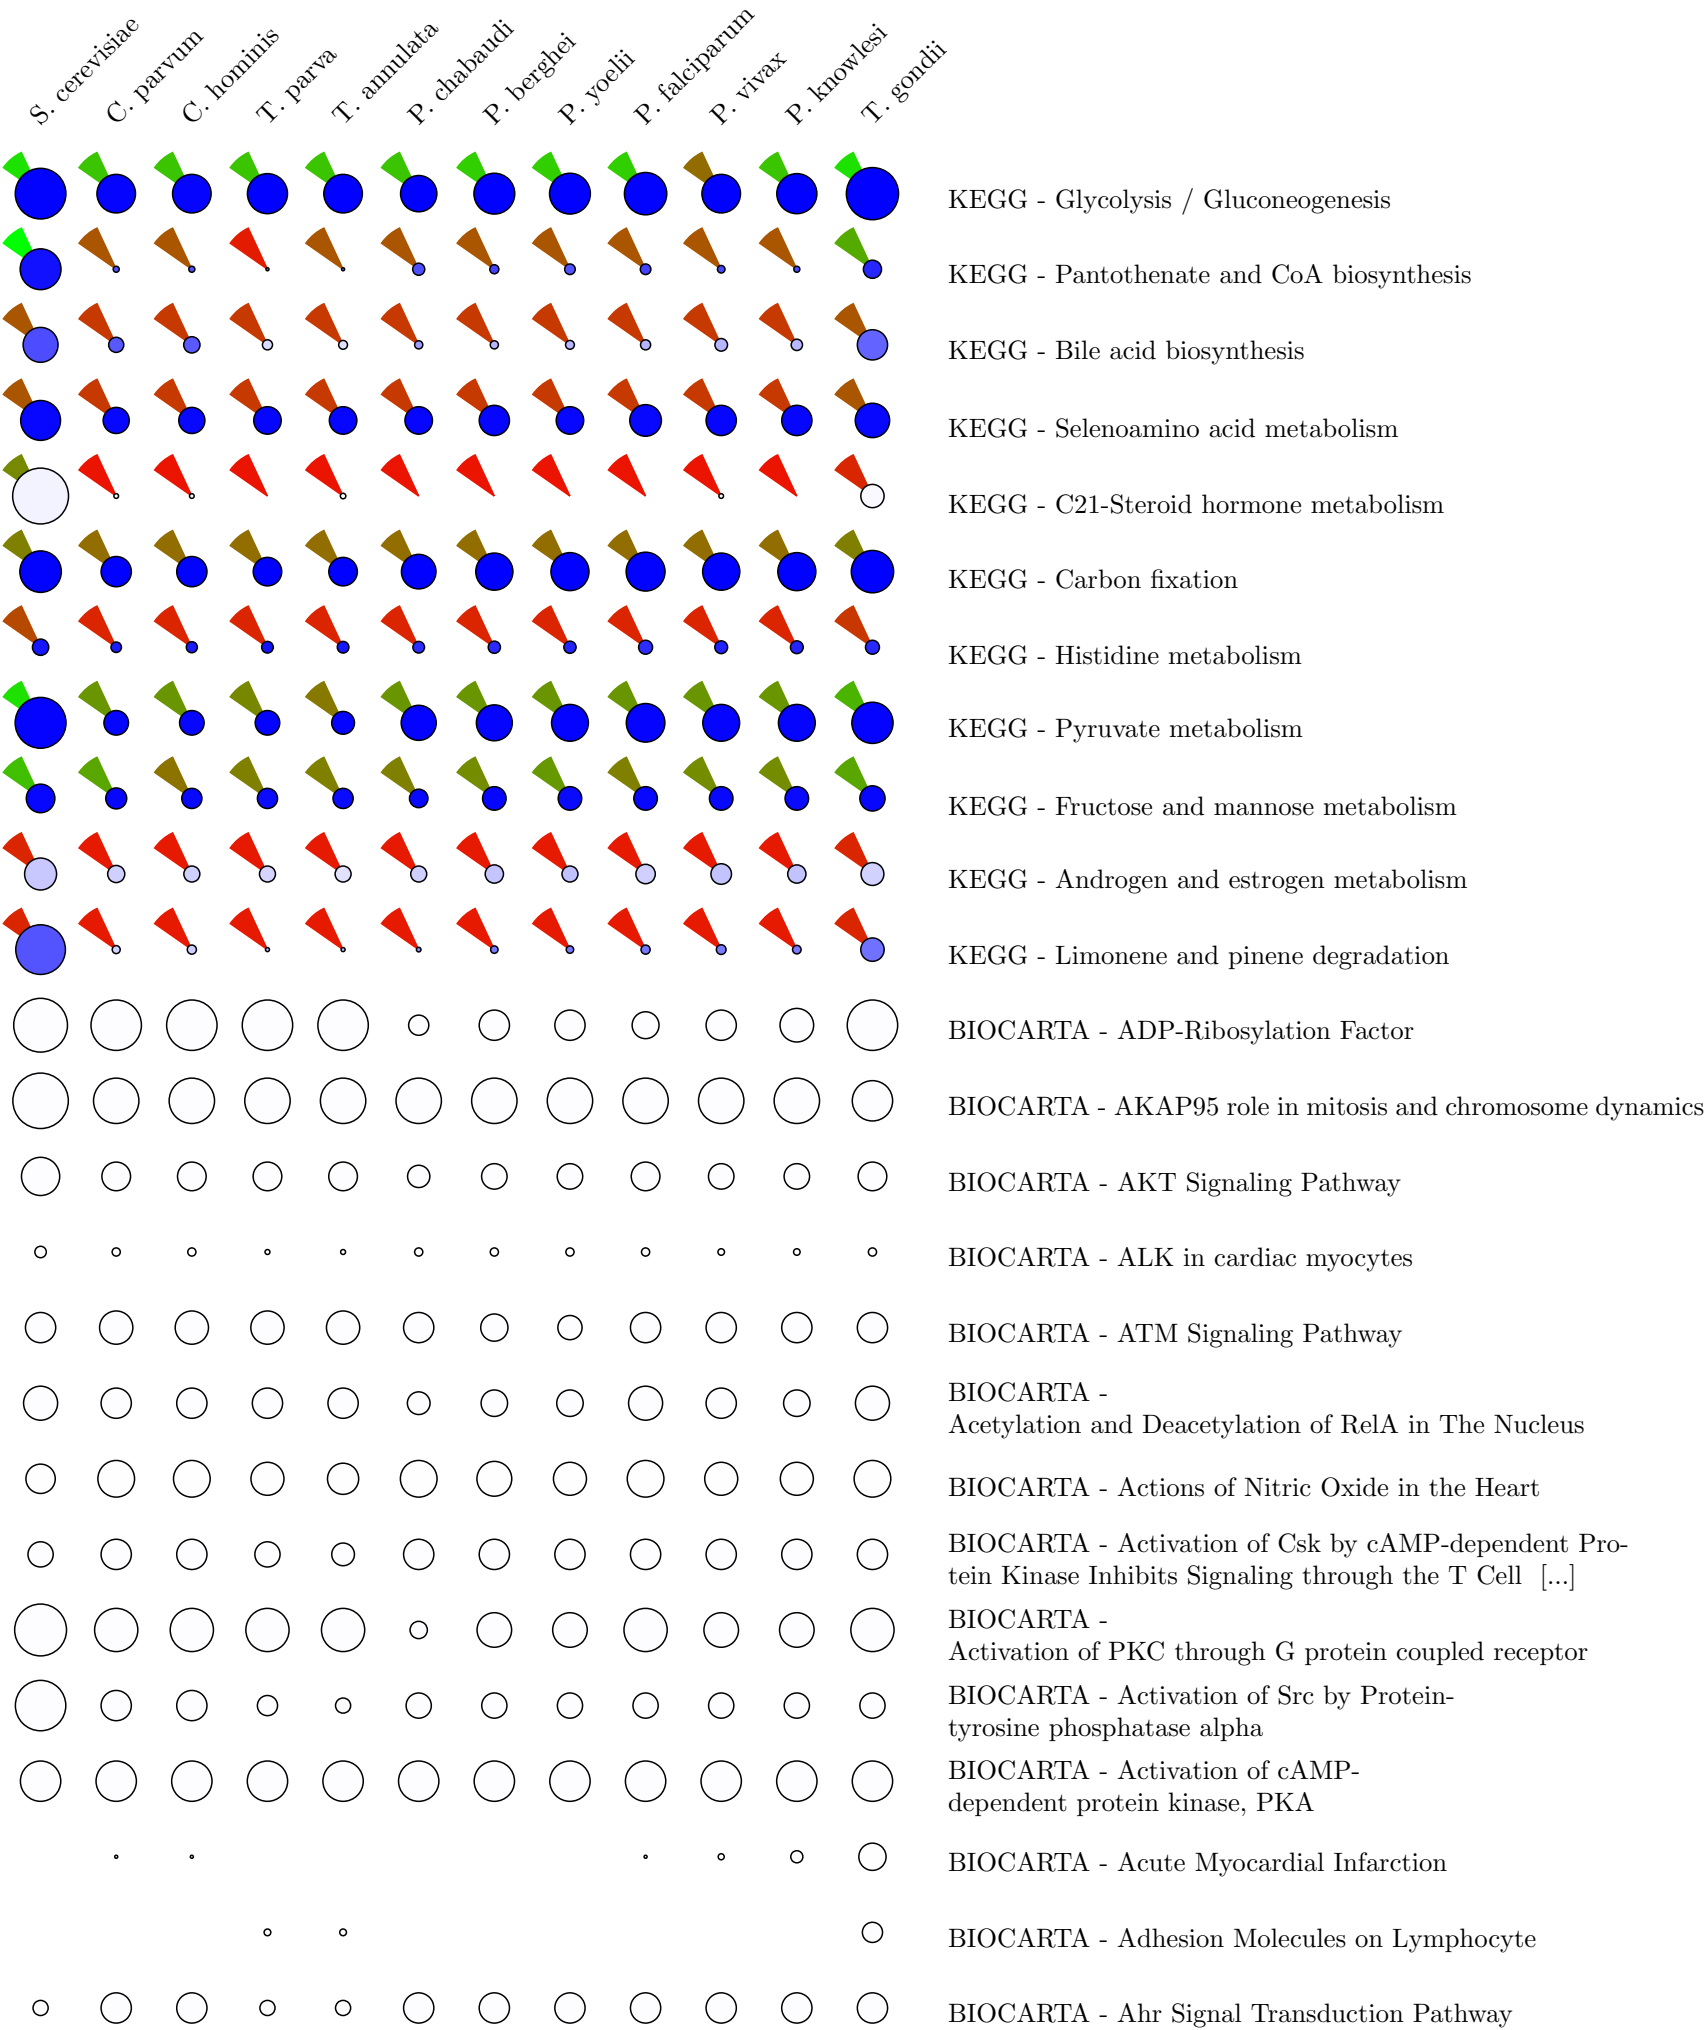

| S. cerevisiae          | C. parvum              | C. hominis             | T. parva               | T. annulata            | P. chabaudi            | P. berghei             | P. yoelii              | P. falciparum          | P. vivax               | P. knowlesi            | T. gondii              |                                                                                                  |
|------------------------|------------------------|------------------------|------------------------|------------------------|------------------------|------------------------|------------------------|------------------------|------------------------|------------------------|------------------------|--------------------------------------------------------------------------------------------------|
| <div><div></div></div> |                        | <div><div></div></div> | <div><div></div></div> | BIOCARTA - Alpha-synuclein and Parkin-mediated proteolysis in Parkinson’s disease                |
| <div><div></div></div> | BIOCARTA - Alternative Complement Pathway                                                        |
| <div><div></div></div> | BIOCARTA - Angiotensin II mediated activation of JNK Pathway via Pyk2 dependent signaling        |
| <div><div></div></div> | BIOCARTA - Angiotensin-converting enzyme 2 regulates heart function                              |
| <div><div></div></div> | BIOCARTA - Anthrax Toxin Mechanism of Action                                                     |
|                        |                        |                        |                        |                        |                        |                        |                        |                        |                        |                        |                        | BIOCARTA - Antigen Dependent B Cell Activation                                                   |
| <div><div></div></div> | BIOCARTA - Apoptotic DNA fragmentation and tissue homeostasis                                    |
| <div><div></div></div> | BIOCARTA - Apoptotic Signaling in Response to DNA Damage                                         |
| <div><div></div></div> | BIOCARTA - Aspirin Blocks Signaling Pathway Involved in Platelet Activation                      |
| <div><div></div></div> | BIOCARTA - Attenuation of GPCR Signaling                                                         |
|                        |                        |                        |                        |                        |                        |                        |                        |                        |                        |                        |                        | BIOCARTA - B Cell Receptor Complex                                                               |
| <div><div></div></div> |                        |                        | <div><div></div></div> | <div><div></div></div> |                        |                        |                        |                        |                        |                        | <div><div></div></div> | BIOCARTA - B Lymphocyte Cell Surface Molecules                                                   |
| <div><div></div></div> | BIOCARTA - BCR Signaling Pathway                                                                 |
| <div><div></div></div> | BIOCARTA - Basic Mechanisms of SUMOylation                                                       |
|                        |                        |                        |                        |                        |                        |                        |                        |                        |                        |                        |                        | BIOCARTA - Basic mechanism of action of PPARa, PPARb(d) and PPARg and effects on gene expression |
| <div><div></div></div> | BIOCARTA - Bioactive Peptide Induced Signaling Pathway                                           |
| <div><div></div></div> | <div><div></div></div> | <div><div></div></div> | <div><div></div></div> | <div><div></div></div> |                        | <div><div></div></div> | <div><div></div></div> | <div><div></div></div> | <div><div></div></div> | <div><div></div></div> | <div><div></div></div> | BIOCARTA - Blockade of Neurotransmitter Release by Botulinum Toxin                               |
| <div><div></div></div> | BIOCARTA - Bone Remodelling                                                                      |
|                        |                        |                        |                        |                        |                        |                        |                        |                        |                        |                        |                        | BIOCARTA - Bystander B Cell Activation                                                           |
| <div><div></div></div> | BIOCARTA - CARM1 and Regulation of the Estrogen Receptor                                         |
| <div><div></div></div> | BIOCARTA - CBL mediated ligand-induced downregulation of EGF receptors                           |
| <div><div></div></div> | BIOCARTA - CCR3 signaling in Eosinophils                                                         |
| <div><div></div></div> | BIOCARTA - CD40L Signaling Pathway                                                               |
|                        |                        |                        | <div><div></div></div> | <div><div></div></div> |                        |                        |                        |                        |                        |                        | <div><div></div></div> | BIOCARTA - CTL mediated immune response against target cells                                     |
| <div><div></div></div> | BIOCARTA - CXCR4 Signaling Pathway                                                               |

| S. cerevisiae                                                                    | C. parvum                                                                          | C. hominis                                                                          | T. parva                                                                            | T. annulata                                                                         | P. chabaudi                                                                         | P. berghei                                                                          | P. yoelii                                                                           | P. falciparum                                                                       | P. vivax                                                                            | P. knowlesi                                                                         | T. gondii                                                                           |                                                                                                            |
|----------------------------------------------------------------------------------|------------------------------------------------------------------------------------|-------------------------------------------------------------------------------------|-------------------------------------------------------------------------------------|-------------------------------------------------------------------------------------|-------------------------------------------------------------------------------------|-------------------------------------------------------------------------------------|-------------------------------------------------------------------------------------|-------------------------------------------------------------------------------------|-------------------------------------------------------------------------------------|-------------------------------------------------------------------------------------|-------------------------------------------------------------------------------------|------------------------------------------------------------------------------------------------------------|
|    |    |    |    |    |    |    |    |    |    |    |    | BIOCARTA - Ca++/ Calmodulin-dependent Protein Kinase Activation                                            |
|    |    |    |    |    |    |    |    |    |    |    |    | BIOCARTA - Cadmium induces DNA synthesis and proliferation in macrophages                                  |
|    |    |    |    |    |    |    |    |    |    |    |    | BIOCARTA - Calcium Signaling by HBx of Hepatitis B virus                                                   |
|    |    |    |    |    |    |    |    |    |    |    |    | BIOCARTA - Cardiac Protection Against ROS                                                                  |
|    |    |    |    |    |    |    |    |    |    |    |    | BIOCARTA - Caspase Cascade in Apoptosis                                                                    |
|    |                                                                                    |                                                                                     |                                                                                     |                                                                                     |    |    |    |    |    |    |    | BIOCARTA - Catabolic Pathways for Arginine , Histidine, Glutamate, Glutamine, and Proline                  |
|    |                                                                                    |                                                                                     |    |    |    |    |    |    |    |    |    | BIOCARTA - Catabolic Pathways for Methionine, Isoleucine, Threonine and Valine                             |
|    |    |    |    |    |    |    |    |    |    |    |    | BIOCARTA - Cell Cycle: G1/S Check Point                                                                    |
|    |    |    |    |    |    |    |    |    |    |    |    | BIOCARTA - Cell Cycle: G2/M Checkpoint                                                                     |
|    |    |    |    |    |    |    |    |    |    |    |    | BIOCARTA - Cell to Cell Adhesion Signaling                                                                 |
|                                                                                  |   |   |   |   |                                                                                     |                                                                                     |   |                                                                                     |                                                                                     |                                                                                     |   | BIOCARTA - Cells and Molecules involved in local acute inflammatory response                               |
|  |  |  |  |  |  |  |  |  |  |  |  | BIOCARTA - Ceramide Signaling Pathway                                                                      |
|  |  |  |  |  |  |  |  |  |  |  |  | BIOCARTA - ChREBP regulation by carbohydrates and cAMP                                                     |
|  |  |  |  |  |  |  |  |  |  |  |  | BIOCARTA - Chaperones modulate interferon Signaling Pathway                                                |
|  |  |  |  |  |  |  |  |  |  |  |  | BIOCARTA - Circadian Rhythms                                                                               |
|                                                                                  |  |  |                                                                                     |                                                                                     |                                                                                     |                                                                                     |                                                                                     |                                                                                     |                                                                                     |                                                                                     |  | BIOCARTA - Classical Complement Pathway                                                                    |
|  |  |  |  |  |  |  |  |  |  |  |  | BIOCARTA - Complement Pathway                                                                              |
|  |  |  |  |  |  |  |  |  |  |  |  | BIOCARTA - Control of skeletal myogenesis by HDAC & calcium/calmodulin-dependent kinase (CaMK)             |
|  |  |  |  |  |  |  |  |  |  |  |  | BIOCARTA - Corticosteroids and cardioprotection                                                            |
|  |  |  |  |  |  |  |  |  |  |  |  | BIOCARTA - Cyclin E Destruction Pathway                                                                    |
|  |  |  |  |  |  |  |  |  |  |  |  | BIOCARTA - Cycling of Ran in nucleocytoplasmic transport                                                   |
|  |  |  |  |  |  |  |  |  |  |  |  | BIOCARTA - Cyclins and Cell Cycle Regulation                                                               |
|  |  |  |  |  |  |  |  |  |  |  |  | BIOCARTA - Cystic fibrosis transmembrane conductance regulator and beta 2 adrenergic receptor pathwa [...] |
|                                                                                  |                                                                                    |                                                                                     |                                                                                     |                                                                                     |                                                                                     |                                                                                     |  |                                                                                     |  |                                                                                     |                                                                                     | BIOCARTA - Cytokine Network                                                                                |
|                                                                                  |                                                                                    |                                                                                     |                                                                                     |                                                                                     |                                                                                     |                                                                                     |                                                                                     |                                                                                     |                                                                                     |                                                                                     |                                                                                     | BIOCARTA - Cytokines and Inflammatory Response                                                             |



| S. cerevisiae | C. parvum | C. hominis | T. parva | T. annulata | P. chabaudi | P. berghei | P. yoelii | P. falciparum | P. vivax | P. knowlesi | T. gondii |                                                                                        |
|---------------|-----------|------------|----------|-------------|-------------|------------|-----------|---------------|----------|-------------|-----------|----------------------------------------------------------------------------------------|
| ○             | •         | •          | ○        | ○           | ○           | ○          | ○         | ○             | ○        | ○           | ○         | BIOCARTA - D4-GDI Signaling Pathway                                                    |
| ○             | ○         | ○          | ○        | ○           | ○           | ○          | ○         | ○             | ○        | ○           | ○         | BIOCARTA - Degradation of the RAR and RXR by the proteasome                            |
| ○             | •         | •          | •        | •           | •           | •          | •         | •             | •        | •           | •         | BIOCARTA - Dendritic cells in regulating TH1 and TH2 Development                       |
| ◯             | ○         | ○          | ○        | ○           | ◯           | ◯          | ◯         | ◯             | ◯        | ◯           | ◯         | BIOCARTA - Deregulation of CDK5 in Alzheimers Disease                                  |
| ◯             | ◯         | ◯          | ◯        | ◯           | ○           | ◯          | ◯         | ◯             | ◯        | ◯           | ◯         | BIOCARTA - Double Stranded RNA Induced Gene Expression                                 |
| ○             | ◯         | ◯          | ◯        | ◯           | ◯           | ◯          | ◯         | ◯             | ◯        | ◯           | ◯         | BIOCARTA - Downregulated of MTA-3 in ER-negative Breast Tumors                         |
| ◯             | ◯         | ◯          | ○        | ○           | ○           | ○          | ○         | ○             | ○        | ○           | ○         | BIOCARTA - E2F1 Destruction Pathway                                                    |
| ◯             | ◯         | ◯          | ○        | ○           | ◯           | ◯          | ◯         | ◯             | ◯        | ◯           | ◯         | BIOCARTA - EGF Signaling Pathway                                                       |
| ◯             | ○         | ○          | ○        | ○           | ○           | ○          | ○         | ○             | ○        | ○           | ○         | BIOCARTA - EPO Signaling Pathway                                                       |
| ◯             | ◯         | ◯          | ○        | ○           | ○           | ○          | ○         | ○             | ○        | ○           | ◯         | BIOCARTA - Effects of calcineurin in Keratinocyte Differentiation                      |
| ◯             | ○         | ○          | ◯        | ◯           | ◯           | ◯          | ◯         | ◯             | ◯        | ◯           | ◯         | BIOCARTA - Electron Transport Reaction in Mitochondria                                 |
| ◯             | ◯         | ◯          | ◯        | ◯           | ◯           | ◯          | ◯         | ◯             | ◯        | ◯           | ◯         | BIOCARTA - Endocytotic role of NDK, Phosphins and Dynamin                              |
| ○             | ◯         | ◯          | ○        | ○           | ◯           | ◯          | ◯         | ◯             | ◯        | ◯           | ◯         | BIOCARTA - Eph Kinases and ephrins support platelet aggregation                        |
| ◯             | ◯         | ◯          | ○        | ○           | ◯           | ◯          | ◯         | ◯             | ◯        | ◯           | ◯         | BIOCARTA - Erk and PI-3 Kinase Are Necessary for Collagen Binding in Corneal Epithelia |
| ◯             | ◯         | ◯          | ○        | ○           | ◯           | ◯          | ◯         | ◯             | ◯        | ◯           | ◯         | BIOCARTA - Erk1/Erk2 Mapk Signaling pathway                                            |
| •             |           |            |          |             | •           |            |           |               |          |             | •         | BIOCARTA - Erythrocyte Differentiation Pathway                                         |
| ○             | ○         | ○          | ○        | ○           | ○           | ○          | ○         | ○             | ○        | ○           | ○         | BIOCARTA - Erythropoietin mediated neuroprotection through NF-kB                       |
|               | •         | •          |          |             |             |            |           | •             |          |             | ○         | BIOCARTA - Extrinsic Prothrombin Activation Pathway                                    |
| ◯             | ○         | ○          | ○        | ○           | ○           | ○          | ○         | ◯             | ○        | ○           | ◯         | BIOCARTA - FAS signaling pathway ( CD95 )                                              |
| ○             | ○         | ○          | ○        | ○           | ○           | ○          | ○         | ○             | ○        | ○           | ○         | BIOCARTA - FOSB gene expression and drug abuse                                         |
| ○             | ○         | ○          | ○        | ○           | ○           | ○          | ○         | ○             | ○        | ○           | ○         | BIOCARTA - FXR and LXR Regulation of Cholesterol Metabolism                            |
| ◯             | ◯         | ◯          | ◯        | ◯           | ◯           | ◯          | ◯         | ◯             | ◯        | ◯           | ◯         | BIOCARTA - Fc Epsilon Receptor I Signaling in Mast Cells                               |
| •             |           |            |          |             |             |            |           | •             |          |             | ○         | BIOCARTA - Fibrinolysis Pathway                                                        |
| ◯             | ○         | ○          | ○        | ○           | ○           | ○          | ○         | ○             | ○        | ○           | ○         | BIOCARTA - Free Radical Induced Apoptosis                                              |
|               |           |            |          |             |             |            |           |               |          |             |           | BIOCARTA - Function of SLRP in Bone: An Integrated View                                |

| S. cerevisiae | C. parvum    | C. hominis   | T. parva     | T. annulata  | P. chabaudi  | P. berghei   | P. yoelii    | P. falciparum | P. vivax     | P. knowlesi  | T. gondii    |                                                                              |
|---------------|--------------|--------------|--------------|--------------|--------------|--------------|--------------|---------------|--------------|--------------|--------------|------------------------------------------------------------------------------|
| <div>○</div>  | <div>○</div> | <div>○</div> | <div>○</div> | <div>○</div> | <div>◦</div> | <div>○</div> | <div>○</div> | <div>○</div>  | <div>○</div> | <div>○</div> | <div>○</div> | BIOCARTA - G-Protein Signaling Through Tubby Proteins                        |
| <div>◯</div>  | <div>◯</div> | <div>◯</div> | <div>◯</div> | <div>◯</div> | <div>◯</div> | <div>◯</div> | <div>◯</div> | <div>◯</div>  | <div>◯</div> | <div>◯</div> | <div>◯</div> | BIOCARTA - GATA3 participate in activating the Th2 cytokine genes expression |
| <div>○</div>  | <div>○</div> | <div>○</div> | <div>○</div> | <div>○</div> | <div>◯</div> | <div>◯</div> | <div>◯</div> | <div>◯</div>  | <div>◯</div> | <div>◯</div> | <div>◯</div> | BIOCARTA - Gamma-aminobutyric Acid Receptor Life Cycle                       |
| <div>◦</div>  | <div>◦</div> | <div>◦</div> | <div>◦</div> | <div>◦</div> | <div>◦</div> | <div>◦</div> | <div>◦</div> | <div>◦</div>  | <div>◦</div> | <div>◦</div> | <div>◯</div> | BIOCARTA - Generation of amyloid b-peptide by PS1                            |
| <div>◯</div>  | <div>◯</div> | <div>◯</div> | <div>◯</div> | <div>◯</div> | <div>◯</div> | <div>◯</div> | <div>◯</div> | <div>◯</div>  | <div>◯</div> | <div>◯</div> | <div>◯</div> | BIOCARTA - Glycolysis Pathway                                                |
| <div>◦</div>  | <div>◯</div>  | <div>◯</div> | <div>◯</div> | <div>◯</div> | BIOCARTA - Granzyme A mediated Apoptosis Pathway                             |
| <div>◯</div>  | <div>◯</div> | <div>◯</div> | <div>◯</div> | <div>◯</div> | <div>◯</div> | <div>◯</div> | <div>◯</div> | <div>◯</div>  | <div>◯</div> | <div>◯</div> | <div>◯</div> | BIOCARTA - Growth Hormone Signaling Pathway                                  |
|               |              |              |              |              |              |              |              |               |              |              |              | BIOCARTA - HIV Induced T Cell Apoptosis                                      |
| <div>◦</div>  | <div>◯</div> | <div>◯</div> |              |              | <div>◯</div> | <div>◯</div> | <div>◯</div> | <div>◯</div>  | <div>◯</div> | <div>◯</div> | <div>◯</div> | BIOCARTA - HIV-1 defeats host-mediated resistance by CEM15                   |
| <div>◯</div>  | <div>◯</div> | <div>◯</div> | <div>◯</div> | <div>◯</div> | <div>◦</div> | <div>◯</div> | <div>◯</div> | <div>◯</div>  | <div>◯</div> | <div>◯</div> | <div>◯</div> | BIOCARTA - HIV-I Nef: negative effector of Fas and TNF                       |
| <div>◯</div>  |              |              |              |              | <div>◯</div> | <div>◯</div> | <div>◯</div> | <div>◯</div>  | <div>◯</div> | <div>◯</div> | <div>◯</div> | BIOCARTA - Hemoglobin's Chaperone                                            |
| <div>◯</div>  |              |              |              |              |              |              |              |               |              |              |              | BIOCARTA - Hop Pathway in Cardiac Development                                |
| <div>◯</div>  | <div>◯</div> | <div>◯</div> | <div>◯</div> | <div>◯</div> | <div>◯</div> | <div>◯</div> | <div>◯</div> | <div>◯</div>  | <div>◯</div> | <div>◯</div> | <div>◯</div> | BIOCARTA - How Progesterone Initiates the Oocyte Maturation                  |
| <div>◯</div>  | <div>◯</div> | <div>◯</div> | <div>◦</div> | <div>◦</div> | <div>◦</div> | <div>◯</div> | <div>◯</div> | <div>◯</div>  | <div>◯</div> | <div>◯</div> | <div>◯</div> | BIOCARTA - How does salmonella hijack a cell                                 |
| <div>◯</div>  | <div>◯</div> | <div>◯</div> | <div>◯</div> | <div>◯</div> | <div>◯</div> | <div>◯</div> | <div>◯</div> | <div>◯</div>  | <div>◯</div> | <div>◯</div> | <div>◯</div> | BIOCARTA - Human Cytomegalovirus and Map Kinase Pathways                     |
| <div>◯</div>  | <div>◯</div> | <div>◯</div> | <div>◯</div> | <div>◯</div> | <div>◯</div> | <div>◯</div> | <div>◯</div> | <div>◯</div>  | <div>◯</div> | <div>◯</div> | <div>◯</div> | BIOCARTA - Hypoxia and p53 in the Cardiovascular system                      |
| <div>◯</div>  | <div>◯</div> | <div>◯</div> | <div>◯</div> | <div>◦</div> | <div>◦</div> | <div>◯</div> | <div>◯</div> | <div>◯</div>  | <div>◯</div> | <div>◯</div> | <div>◯</div> | BIOCARTA - Hypoxia-Inducible Factor in the Cardiovascular System             |
| <div>◦</div>  | <div>◦</div> | <div>◦</div> | <div>◦</div> |              | <div>◦</div> | <div>◦</div> | <div>◯</div> | <div>◦</div>  | <div>◦</div> | <div>◯</div> | <div>◦</div> | BIOCARTA - IFN alpha signaling pathway                                       |
| <div>◯</div>  | <div>◯</div> | <div>◯</div> | <div>◯</div> | <div>◦</div> | <div>◯</div> | <div>◯</div> | <div>◯</div> | <div>◯</div>  | <div>◯</div> | <div>◯</div> | <div>◯</div> | BIOCARTA - IFN gamma signaling pathway                                       |
| <div>◯</div>  | <div>◯</div> | <div>◯</div> | <div>◯</div> | <div>◯</div> | <div>◯</div> | <div>◯</div> | <div>◯</div> | <div>◯</div>  | <div>◯</div> | <div>◯</div> | <div>◯</div> | BIOCARTA - IGF-1 Signaling Pathway                                           |
|               |              |              |              |              |              |              |              |               |              |              |              | BIOCARTA - IL 17 Signaling Pathway                                           |
|               |              |              |              |              |              |              |              |               |              |              |              | BIOCARTA - IL 18 Signaling Pathway                                           |
| <div>◯</div>  | <div>◯</div> | <div>◯</div> | <div>◯</div> | <div>◦</div> | <div>◯</div> | <div>◯</div> | <div>◯</div> | <div>◯</div>  | <div>◯</div> | <div>◯</div> | <div>◯</div> | BIOCARTA - IL 2 signaling pathway                                            |
| <div>◯</div>  | <div>◯</div> | <div>◯</div> | <div>◯</div> | <div>◯</div> | <div>◯</div> | <div>◯</div> | <div>◯</div> | <div>◯</div>  | <div>◯</div> | <div>◯</div> | <div>◯</div> | BIOCARTA - IL 3 signaling pathway                                            |
| <div>◯</div>  | <div>◯</div> | <div>◯</div> | <div>◯</div> | <div>◦</div> | <div>◯</div> | <div>◯</div> | <div>◯</div> | <div>◯</div>  | <div>◯</div> | <div>◯</div> | <div>◯</div> | BIOCARTA - IL 4 signaling pathway                                            |



| <i>S. cerevisiae</i> | <i>C. parvum</i> | <i>C. hominis</i> | <i>T. parva</i> | <i>T. annulata</i> | <i>P. chabaudi</i> | <i>P. berghei</i> | <i>P. yoelii</i> | <i>P. falciparum</i> | <i>P. vivax</i> | <i>P. knowlesi</i> | <i>T. gondii</i> |                                                                                                   |
|----------------------|------------------|-------------------|-----------------|--------------------|--------------------|-------------------|------------------|----------------------|-----------------|--------------------|------------------|---------------------------------------------------------------------------------------------------|
|                      |                  |                   |                 |                    |                    |                   |                  |                      |                 |                    |                  | BiOCARTA - IL 5 Signaling Pathway                                                                 |
| ○                    | ○                | ○                 | ○               | ○                  | ○                  | ○                 | ○                | ○                    | ○               | ○                  | ○                | BiOCARTA - IL 6 signaling pathway                                                                 |
| ◦                    | ◦                | ◦                 | ◦               |                    | ◦                  | ◦                 | ◦                | ◦                    | ◦               | ◦                  | ◦                | BiOCARTA - IL-10 Anti-inflammatory Signaling Pathway                                              |
| ○                    | ○                | ○                 | ○               | ○                  | ○                  | ○                 | ○                | ○                    | ○               | ○                  | ○                | BiOCARTA - IL-2 Receptor Beta Chain in T cell Activation                                          |
| ○                    | ○                | ○                 | ○               | ◦                  | ○                  | ○                 | ○                | ○                    | ○               | ○                  | ○                | BiOCARTA - IL-7 Signal Transduction                                                               |
| ◦                    | ○                | ○                 | ○               | ◦                  | ○                  | ○                 | ○                | ○                    | ○               | ○                  | ○                | BiOCARTA - IL12 and Stat4 Dependent Signaling Pathway in Th1 Development                          |
| ○                    | ○                | ○                 | ◦               | ◦                  | ○                  | ○                 | ○                | ○                    | ○               | ○                  | ○                | BiOCARTA - IL22 Soluble Receptor Signaling Pathway                                                |
| ○                    | ○                | ○                 | ○               | ○                  | ○                  | ○                 | ○                | ○                    | ○               | ○                  | ○                | BiOCARTA - Inactivation of Gsk3 by AKT causes accumulation of b-catenin in Alveolar Macrophages   |
| ◦                    | ◦                | ◦                 | ○               | ○                  | ◦                  | ◦                 | ◦                | ○                    | ◦               | ○                  | ○                | BiOCARTA - Induction of apoptosis through DR3 and DR4/5 Death Receptors                           |
| ○                    | ○                | ○                 | ○               | ○                  | ○                  | ○                 | ○                | ○                    | ○               | ○                  | ○                | BiOCARTA - Influence of Ras and Rho proteins on G1 to S Transition                                |
| ○                    | ○                | ○                 | ○               | ○                  | ○                  | ○                 | ○                | ○                    | ○               | ○                  | ○                | BiOCARTA - Inhibition of Cellular Proliferation by Gleevec                                        |
| ○                    | ○                | ○                 | ○               | ○                  | ○                  | ○                 | ○                | ○                    | ○               | ○                  | ○                | BiOCARTA - Inhibition of Huntington's disease neurodegeneration by histone deacetylase inhibitors |
| ◦                    | ◦                | ◦                 | ◦               | ◦                  | ◦                  | ◦                 | ◦                | ◦                    | ◦               | ◦                  | ○                | BiOCARTA - Inhibition of Matrix Metalloproteinases                                                |
| ○                    | ○                | ○                 | ○               | ○                  | ○                  | ○                 | ○                | ○                    | ○               | ○                  | ○                | BiOCARTA - Insulin Signaling Pathway                                                              |
| ○                    | ○                | ○                 | ○               | ○                  | ○                  | ○                 | ○                | ○                    | ○               | ○                  | ○                | BiOCARTA - Integrin Signaling Pathway                                                             |
|                      | ◦                | ◦                 |                 |                    |                    |                   |                  | ◦                    | ◦               | ○                  | ○                | BiOCARTA - Intrinsic Prothrombin Activation Pathway                                               |
| ○                    | ○                | ○                 | ○               | ○                  | ○                  | ○                 | ○                | ○                    | ○               | ○                  | ○                | BiOCARTA - Ion Channel and Phorbol Esters Signaling Pathway                                       |
| ○                    | ○                | ○                 | ○               | ○                  | ○                  | ○                 | ○                | ○                    | ○               | ○                  | ○                | BiOCARTA - Keratinocyte Differentiation                                                           |
| ◦                    | ○                | ○                 | ◦               |                    | ○                  | ○                 | ○                | ○                    | ○               | ○                  | ○                | BiOCARTA - Lck and Fyn tyrosine kinases in initiation of TCR Activation                           |
|                      | ◦                | ◦                 |                 |                    |                    |                   |                  |                      |                 |                    | ◦                | BiOCARTA - Lectin Induced Complement Pathway                                                      |
| ○                    | ○                | ○                 |                 |                    |                    |                   |                  |                      |                 |                    | ○                | BiOCARTA - Leloir pathway of galactose metabolism                                                 |
| ○                    | ○                | ○                 | ○               | ○                  | ○                  | ○                 | ○                | ○                    | ○               | ○                  | ○                | BiOCARTA - Links between Pyk2 and Map Kinases                                                     |
| ◦                    | ○                | ○                 |                 |                    | ○                  | ○                 | ○                | ○                    | ○               | ○                  | ○                | BiOCARTA - Low-density lipoprotein (LDL) pathway during atherogenesis                             |
| ○                    | ○                | ○                 | ○               | ○                  | ○                  | ○                 | ○                | ○                    | ○               | ○                  | ○                | BiOCARTA - MAPKinase Signaling Pathway                                                            |
| ○                    | ○                | ○                 | ○               | ○                  | ○                  | ○                 | ○                | ○                    | ○               | ○                  | ○                | BiOCARTA - METS affect on Macrophage Differentiation                                              |

| S. cerevisiae                                                                    | C. parvum                                                                          | C. hominis                                                                          | T. parva                                                                            | T. annulata                                                                         | P. chabaudi                                                                         | P. berghei                                                                          | P. yoelii                                                                           | P. falciparum                                                                       | P. vivax                                                                            | P. knowlesi                                                                         | T. gondii                                                                           |                                                                                                            |
|----------------------------------------------------------------------------------|------------------------------------------------------------------------------------|-------------------------------------------------------------------------------------|-------------------------------------------------------------------------------------|-------------------------------------------------------------------------------------|-------------------------------------------------------------------------------------|-------------------------------------------------------------------------------------|-------------------------------------------------------------------------------------|-------------------------------------------------------------------------------------|-------------------------------------------------------------------------------------|-------------------------------------------------------------------------------------|-------------------------------------------------------------------------------------|------------------------------------------------------------------------------------------------------------|
|    |    |    |    |    |    |    |    |    |    |    |    | BIOCARTA - Malate-aspartate shuttle                                                                        |
|    |    |    |    |    |    |    |    |    |    |    |    | BIOCARTA - Map Kinase Inactivation of SMRT Corepressor                                                     |
|    |                                                                                    |                                                                                     |                                                                                     |                                                                                     |                                                                                     |                                                                                     |                                                                                     |                                                                                     |                                                                                     |                                                                                     |    | BIOCARTA - Mechanism of Acetaminophen Activity and Toxicity                                                |
|    |    |    |    |    |    |    |    |    |    |    |    | BIOCARTA - Mechanism of Gene Regulation by Peroxisome Proliferators via PPARα(alpha)                       |
|    |    |    |    |    |    |    |    |    |    |    |    | BIOCARTA - Mitochondrial Carnitine Palmitoyltransferase (CPT) System                                       |
|                                                                                  |                                                                                    |                                                                                     |    |    |                                                                                     |                                                                                     |                                                                                     |                                                                                     |                                                                                     |                                                                                     |    | BIOCARTA - Monocyte and its Surface Molecules                                                              |
|                                                                                  |    |    |                                                                                     |                                                                                     |    |    |    |    |    |    |    | BIOCARTA - Msp/Ron Receptor Signaling Pathway                                                              |
|    |    |    |    |    |    |    |    |    |    |    |    | BIOCARTA - Multi-Drug Resistance Factors                                                                   |
|    |    |    |    |    |    |    |    |    |    |    |    | BIOCARTA - Multi-step Regulation of Transcription by Pitx2                                                 |
|    |    |    |    |    |    |    |    |    |    |    |    | BIOCARTA - Multiple antiapoptotic pathways from IGF-1R signaling lead to BAD phosphorylation               |
|   |   |   |   |   |   |   |   |   |   |   |   | BIOCARTA - NF-κB Signaling Pathway                                                                         |
|  |  |  |  |  |  |  |  |  |  |  |  | BIOCARTA - NFAT and Hypertrophy of the heart (Transcription in the broken heart)                           |
|  |  |  |  |  |  |  |  |  |  |  |  | BIOCARTA - NFκB activation by Nontypeable Hemophilus influenzae                                            |
|  |  |  |  |  |  |  |  |  |  |  |  | BIOCARTA - NO2-dependent IL 12 Pathway in NK cells                                                         |
|  |  |  |  |  |  |  |  |  |  |  |  | BIOCARTA - Nerve growth factor pathway (NGF)                                                               |
|  |  |  |  |  |  |  |  |  |  |  |  | BIOCARTA - Neuropeptides VIP and PACAP inhibit the apoptosis of activated T cells                          |
|  |  |  |  |  |  |  |  |  |  |  |  | BIOCARTA - Neuroregulin receptor degradation protein-1 Controls ErbB3 receptor recycling                   |
|                                                                                  |                                                                                    |                                                                                     |  |  |                                                                                     |                                                                                     |                                                                                     |                                                                                     |                                                                                     |                                                                                     |  | BIOCARTA - Neutrophil and Its Surface Molecules                                                            |
|  |  |  |  |  |  |  |  |  |  |  |  | BIOCARTA - Nitric Oxide Signaling Pathway                                                                  |
|  |  |  |  |  |  |  |  |  |  |  |  | BIOCARTA - Nuclear receptors coordinate the activities of chromatin remodeling complexes and coactiv [...] |
|                                                                                  |                                                                                    |                                                                                     |                                                                                     |                                                                                     |                                                                                     |                                                                                     |                                                                                     |                                                                                     |                                                                                     |                                                                                     |                                                                                     | BIOCARTA - OX40 Signaling Pathway                                                                          |
|  |                                                                                    |                                                                                     |  |  |  |  |  |  |  |  |  | BIOCARTA - Opposing roles of AIF in Apoptosis and Cell Survival                                            |
|  |  |  |  |  |  |  |  |  |  |  |  | BIOCARTA - Overview of telomerase RNA component gene hTerc Transcriptional Regulation                      |
|  |  |  |  |  |  |  |  |  |  |  |  | BIOCARTA - Overview of telomerase protein component gene hTert Transcriptional Regulation                  |
|  |  |  |  |  |  |  |  |  |  |  |  | BIOCARTA - Oxidative Stress Induced Gene Expression Via Nrf2                                               |

| S. cerevisiae | C. parvum   | C. hominis  | T. parva    | T. annulata | P. chabaudi | P. berghei  | P. yoelii   | P. falciparum | P. vivax    | P. knowlesi | T. gondii   |                                                                                             |
|---------------|-------------|-------------|-------------|-------------|-------------|-------------|-------------|---------------|-------------|-------------|-------------|---------------------------------------------------------------------------------------------|
| <div></div>   | <div></div> | <div></div> | <div></div> | <div></div> | <div></div> | <div></div> | <div></div> | <div></div>   | <div></div> | <div></div> | <div></div> | BIOCARTA - PDGF Signaling Pathway                                                           |
| <div></div>   | <div></div> | <div></div> | <div></div> | <div></div> | <div></div> | <div></div> | <div></div> | <div></div>   | <div></div> | <div></div> | <div></div> | BIOCARTA - PKC-catalyzed phosphorylation of inhibitory phosphoprotein of myosin phosphatase |
| <div></div>   | <div></div> | <div></div> | <div></div> | <div></div> | <div></div> | <div></div> | <div></div> | <div></div>   | <div></div> | <div></div> | <div></div> | BIOCARTA - PTEN dependent cell cycle arrest and apoptosis                                   |
| <div></div>   | <div></div> | <div></div> | <div></div> | <div></div> | <div></div> | <div></div> | <div></div> | <div></div>   | <div></div> | <div></div> | <div></div> | BIOCARTA - Pelp1 Modulation of Estrogen Receptor Activity                                   |
| <div></div>   | <div></div> | <div></div> | <div></div> | <div></div> | <div></div> | <div></div> | <div></div> | <div></div>   | <div></div> | <div></div> | <div></div> | BIOCARTA - Pertussis toxin-insensitive CCR5 Signaling in Macrophage                         |
| <div></div>   | <div></div> | <div></div> | <div></div> | <div></div> | <div></div> | <div></div> | <div></div> | <div></div>   | <div></div> | <div></div> | <div></div> | BIOCARTA - Phosphoinositides and their downstream targets.                                  |
| <div></div>   | <div></div> | <div></div> | <div></div> | <div></div> | <div></div> | <div></div> | <div></div> | <div></div>   | <div></div> | <div></div> | <div></div> | BIOCARTA - Phospholipase C Signaling Pathway                                                |
| <div></div>   | <div></div> | <div></div> | <div></div> | <div></div> | <div></div> | <div></div> | <div></div> | <div></div>   | <div></div> | <div></div> | <div></div> | BIOCARTA - Phospholipase C d1 in phospholipid associated cell signaling                     |
| <div></div>   | <div></div> | <div></div> | <div></div> | <div></div> | <div></div> | <div></div> | <div></div> | <div></div>   | <div></div> | <div></div> | <div></div> | BIOCARTA - Phospholipase C-epsilon pathway                                                  |
| <div></div>   | <div></div> | <div></div> | <div></div> | <div></div> | <div></div> | <div></div> | <div></div> | <div></div>   | <div></div> | <div></div> | <div></div> | BIOCARTA - Phospholipids as signalling intermediaries                                       |
| <div></div>   | <div></div> | <div></div> | <div></div> | <div></div> | <div></div> | <div></div> | <div></div> | <div></div>   | <div></div> | <div></div> | <div></div> | BIOCARTA - Phosphorylation of MEK1 by cdk5/p35 down regulates the MAP kinase pathway        |
| <div></div>   | <div></div> | <div></div> | <div></div> | <div></div> | <div></div> | <div></div> | <div></div> | <div></div>   | <div></div> | <div></div> | <div></div> | BIOCARTA - Presenilin action in Notch and Wnt signaling                                     |
|               |             |             |             |             |             |             |             |               |             |             | <div></div> | BIOCARTA - Proepithelin Conversion to Epithelin and Wound Repair Control                    |
| <div></div>   | <div></div> | <div></div> | <div></div> | <div></div> | <div></div> | <div></div> | <div></div> | <div></div>   | <div></div> | <div></div> | <div></div> | BIOCARTA - Protein Kinase A at the Centrosome                                               |
| <div></div>   | <div></div> | <div></div> | <div></div> | <div></div> | <div></div> | <div></div> | <div></div> | <div></div>   | <div></div> | <div></div> | <div></div> | BIOCARTA - Proteolysis and Signaling Pathway of Notch                                       |
| <div></div>   | <div></div> | <div></div> | <div></div> | <div></div> | <div></div> | <div></div> | <div></div> | <div></div>   | <div></div> | <div></div> | <div></div> | BIOCARTA - RB Tumor Suppressor/Checkpoint Signaling in response to DNA damage               |
| <div></div>   | <div></div> | <div></div> | <div></div> | <div></div> | <div></div> | <div></div> | <div></div> | <div></div>   | <div></div> | <div></div> | <div></div> | BIOCARTA - Rab GTPases Mark Targets In The Endocytotic Machinery                            |
| <div></div>   | <div></div> | <div></div> | <div></div> | <div></div> | <div></div> | <div></div> | <div></div> | <div></div>   | <div></div> | <div></div> | <div></div> | BIOCARTA - Rac 1 cell motility signaling pathway                                            |
| <div></div>   | <div></div> | <div></div> | <div></div> | <div></div> | <div></div> | <div></div> | <div></div> | <div></div>   | <div></div> | <div></div> | <div></div> | BIOCARTA - Ras Signaling Pathway                                                            |
| <div></div>   | <div></div> | <div></div> | <div></div> | <div></div> | <div></div> | <div></div> | <div></div> | <div></div>   | <div></div> | <div></div> | <div></div> | BIOCARTA - Ras-Independent pathway in NK cell-mediated cytotoxicity                         |
| <div></div>   | <div></div> | <div></div> | <div></div> | <div></div> | <div></div> | <div></div> | <div></div> | <div></div>   | <div></div> | <div></div> | <div></div> | BIOCARTA - Reelin Signaling Pathway                                                         |
| <div></div>   | <div></div> | <div></div> | <div></div> | <div></div> | <div></div> | <div></div> | <div></div> | <div></div>   | <div></div> | <div></div> | <div></div> | BIOCARTA - Regulation of BAD phosphorylation                                                |
| <div></div>   | <div></div> | <div></div> | <div></div> | <div></div> | <div></div> | <div></div> | <div></div> | <div></div>   | <div></div> | <div></div> | <div></div> | BIOCARTA - Regulation of PGC-1a                                                             |
| <div></div>   | <div></div> | <div></div> | <div></div> | <div></div> | <div></div> | <div></div> | <div></div> | <div></div>   | <div></div> | <div></div> | <div></div> | BIOCARTA - Regulation of Spermatogenesis by CREM                                            |
| <div></div>   | <div></div> | <div></div> | <div></div> | <div></div> | <div></div> | <div></div> | <div></div> | <div></div>   | <div></div> | <div></div> | <div></div> | BIOCARTA - Regulation of cell cycle progression by Plk3                                     |

| <i>S. cerevisiae</i> | <i>C. parvum</i> | <i>C. hominis</i> | <i>T. parva</i> | <i>T. annulata</i> | <i>P. chabaudi</i> | <i>P. berghei</i> | <i>P. yoelii</i> | <i>P. falciparum</i> | <i>P. vivax</i> | <i>P. knowlesi</i> | <i>T. gondii</i> |                                                                                            |
|----------------------|------------------|-------------------|-----------------|--------------------|--------------------|-------------------|------------------|----------------------|-----------------|--------------------|------------------|--------------------------------------------------------------------------------------------|
|                      |                  |                   |                 |                    |                    |                   |                  |                      |                 |                    |                  | Biocarta - Regulation of ck1/cdk5 by type 1 glutamate receptors                            |
|                      |                  |                   |                 |                    |                    |                   |                  |                      |                 |                    |                  | Biocarta - Regulation of eIF2                                                              |
|                      |                  |                   |                 |                    |                    |                   |                  |                      |                 |                    |                  | Biocarta - Regulation of eIF4e and p70 S6 Kinase                                           |
|                      |                  |                   |                 |                    |                    |                   |                  |                      |                 |                    |                  | Biocarta - Regulation of hematopoiesis by cytokines                                        |
|                      |                  |                   |                 |                    |                    |                   |                  |                      |                 |                    |                  | Biocarta - Regulation of p27 Phosphorylation during Cell Cycle Progression                 |
|                      |                  |                   |                 |                    |                    |                   |                  |                      |                 |                    |                  | Biocarta - Regulation of transcriptional activity by PML                                   |
|                      |                  |                   |                 |                    |                    |                   |                  |                      |                 |                    |                  | Biocarta - Repression of Pain Sensation by the Transcriptional Regulator DREAM             |
|                      |                  |                   |                 |                    |                    |                   |                  |                      |                 |                    |                  | Biocarta - Reversal of Insulin Resistance by Leptin                                        |
|                      |                  |                   |                 |                    |                    |                   |                  |                      |                 |                    |                  | Biocarta - Rho cell motility signaling pathway                                             |
|                      |                  |                   |                 |                    |                    |                   |                  |                      |                 |                    |                  | Biocarta - Rho-Selective Guanine Exchange Factor AKAP13 Mediates Stress Fiber Formation    |
|                      |                  |                   |                 |                    |                    |                   |                  |                      |                 |                    |                  | Biocarta - Role of BRCA1, BRCA2 and ATR in Cancer Susceptibility                           |
|                      |                  |                   |                 |                    |                    |                   |                  |                      |                 |                    |                  | Biocarta - Role of EGF Receptor Transactivation by GPCRs in Cardiac Hypertrophy            |
|                      |                  |                   |                 |                    |                    |                   |                  |                      |                 |                    |                  | Biocarta - Role of Erk5 in Neuronal Survival                                               |
|                      |                  |                   |                 |                    |                    |                   |                  |                      |                 |                    |                  | Biocarta - Role of MEF2D in T-cell Apoptosis                                               |
|                      |                  |                   |                 |                    |                    |                   |                  |                      |                 |                    |                  | Biocarta - Role of Mitochondria in Apoptotic Signaling                                     |
|                      |                  |                   |                 |                    |                    |                   |                  |                      |                 |                    |                  | Biocarta - Role of PI3K subunit p85 in regulation of Actin Organization and Cell Migration |
|                      |                  |                   |                 |                    |                    |                   |                  |                      |                 |                    |                  | Biocarta - Role of PPAR-gamma Coactivators in Obesity and Thermogenesis                    |
|                      |                  |                   |                 |                    |                    |                   |                  |                      |                 |                    |                  | Biocarta - Role of Parkin in the Ubiquitin-Proteasomal Pathway                             |
|                      |                  |                   |                 |                    | .                  |                   |                  |                      |                 |                    | .                | Biocarta - Role of Tob in T-cell activation                                                |
|                      |                  |                   |                 |                    |                    |                   |                  |                      |                 |                    |                  | Biocarta - Role of nicotinic acetylcholine receptors in the regulation of apoptosis        |
|                      |                  |                   |                 |                    |                    |                   |                  |                      |                 |                    |                  | Biocarta - SARS Coronavirus Protease                                                       |
|                      |                  |                   |                 |                    |                    |                   |                  |                      |                 |                    |                  | Biocarta - SODD/TNFR1 Signaling Pathway                                                    |
|                      |                  |                   |                 |                    |                    |                   |                  |                      |                 |                    |                  | Biocarta - SREBP control of lipid synthesis                                                |
| .                    | .                | .                 | .               |                    | .                  | .                 | .                | .                    | .               | .                  | .                | Biocarta - Selective expression of chemokine receptors during T-cell polarization          |
|                      |                  |                   |                 |                    |                    |                   |                  |                      |                 |                    |                  | Biocarta - Shuttle for transfer of acetyl groups from mitochondria to the cytosol          |

| S. cerevisiae                                                                    | C. parvum                                                                          | C. hominis                                                                          | T. parva                                                                            | T. annulata                                                                         | P. chabaudi                                                                         | P. berghei                                                                          | P. yoelii                                                                           | P. falciparum                                                                       | P. vivax                                                                            | P. knowlesi                                                                         | T. gondii                                                                           |                                                                          |
|----------------------------------------------------------------------------------|------------------------------------------------------------------------------------|-------------------------------------------------------------------------------------|-------------------------------------------------------------------------------------|-------------------------------------------------------------------------------------|-------------------------------------------------------------------------------------|-------------------------------------------------------------------------------------|-------------------------------------------------------------------------------------|-------------------------------------------------------------------------------------|-------------------------------------------------------------------------------------|-------------------------------------------------------------------------------------|-------------------------------------------------------------------------------------|--------------------------------------------------------------------------|
|    |    |    |    |    |    |    |    |    |    |    |    | Biocarta - Signal Dependent Regulation of Myogenesis by Corepressor MITR |
|    |    |    |    |    |    |    |    |    |    |    |    | Biocarta - Signal transduction through IL1R                              |
|    |    |    |    |    |    |    |    |    |    |    |    | Biocarta - Signaling Pathway from G-Protein Families                     |
|    |    |    |    |    |    |    |    |    |    |    |    | Biocarta - Signaling of Hepatocyte Growth Factor Receptor                |
|    |    |    |    |    |    |    |    |    |    |    |    | Biocarta - Skeletal muscle hypertrophy is regulated via AKT/mTOR pathway |
|    |                                                                                    |                                                                                     |                                                                                     |    |                                                                                     |                                                                                     |                                                                                     |    |    |    |                                                                                     | Biocarta - Small Leucine-rich Proteoglycan (SLRP) molecules              |
|    |    |    |    |    |    |    |    |    |    |    |    | Biocarta - Sonic Hedgehog (SHH) Receptor Ptc1 Regulates cell cycle       |
|    |    |    |    |    |    |    |    |    |    |    |    | Biocarta - Sonic Hedgehog (Shh) Pathway                                  |
|    |    |    |    |    |    |    |    |    |    |    |    | Biocarta - Sprouty regulation of tyrosine kinase signals                 |
|   |   |   |   |   |   |   |   |   |   |   |   | Biocarta - Stat3 Signaling Pathway                                       |
|  |  |  |  |  |  |  |  |  |  |  |  | Biocarta - Stress Induction of HSP Regulation                            |
|  |  |  |  |  |  |  |  |  |  |  |  | Biocarta - T Cell Receptor Signaling Pathway                             |
|                                                                                  |                                                                                    |                                                                                     |                                                                                     |                                                                                     |                                                                                     |                                                                                     |                                                                                     |                                                                                     |                                                                                     |                                                                                     |                                                                                     | Biocarta - T Cell Receptor and CD3 Complex                               |
|  |                                                                                    |                                                                                     |  |  |                                                                                     |                                                                                     |                                                                                     |                                                                                     |                                                                                     |                                                                                     |  | Biocarta - T Cytotoxic Cell Surface Molecules                            |
|  |                                                                                    |                                                                                     |  |  |                                                                                     |                                                                                     |                                                                                     |                                                                                     |                                                                                     |                                                                                     |  | Biocarta - T Helper Cell Surface Molecules                               |
|  |  |  |  |  |  |  |  |  |  |  |  | Biocarta - TACI and BCMA stimulation of B cell immune responses.         |
|  |  |  |  |  |  |  |  |  |  |  |  | Biocarta - TGF beta signaling pathway                                    |
|  |  |  |  |  |  |  |  |  |  |  |  | Biocarta - TNF/Stress Related Signaling                                  |
|  |  |  |  |  |  |  |  |  |  |  |  | Biocarta - TNFR1 Signaling Pathway                                       |
|  |  |  |  |  |  |  |  |  |  |  |  | Biocarta - TNFR2 Signaling Pathway                                       |
|  |  |  |  |  |  |  |  |  |  |  |  | Biocarta - TPO Signaling Pathway                                         |
|  |  |  |  |  |  |  |  |  |  |  |  | Biocarta - TSP-1 Induced Apoptosis in Microvascular Endothelial Cell     |
|  |  |  |  |  |  |  |  |  |  |  |  | Biocarta - Telomeres, Telomerase, Cellular Aging, and Immortality        |
|                                                                                  |                                                                                    |                                                                                     |                                                                                     |                                                                                     |                                                                                     |                                                                                     |                                                                                     |                                                                                     |                                                                                     |                                                                                     |                                                                                     | Biocarta - Th1/Th2 Differentiation                                       |
|  |  |  |  |  |  |  |  |  |  |  |  | Biocarta - The 4-1BB-dependent immune response                           |

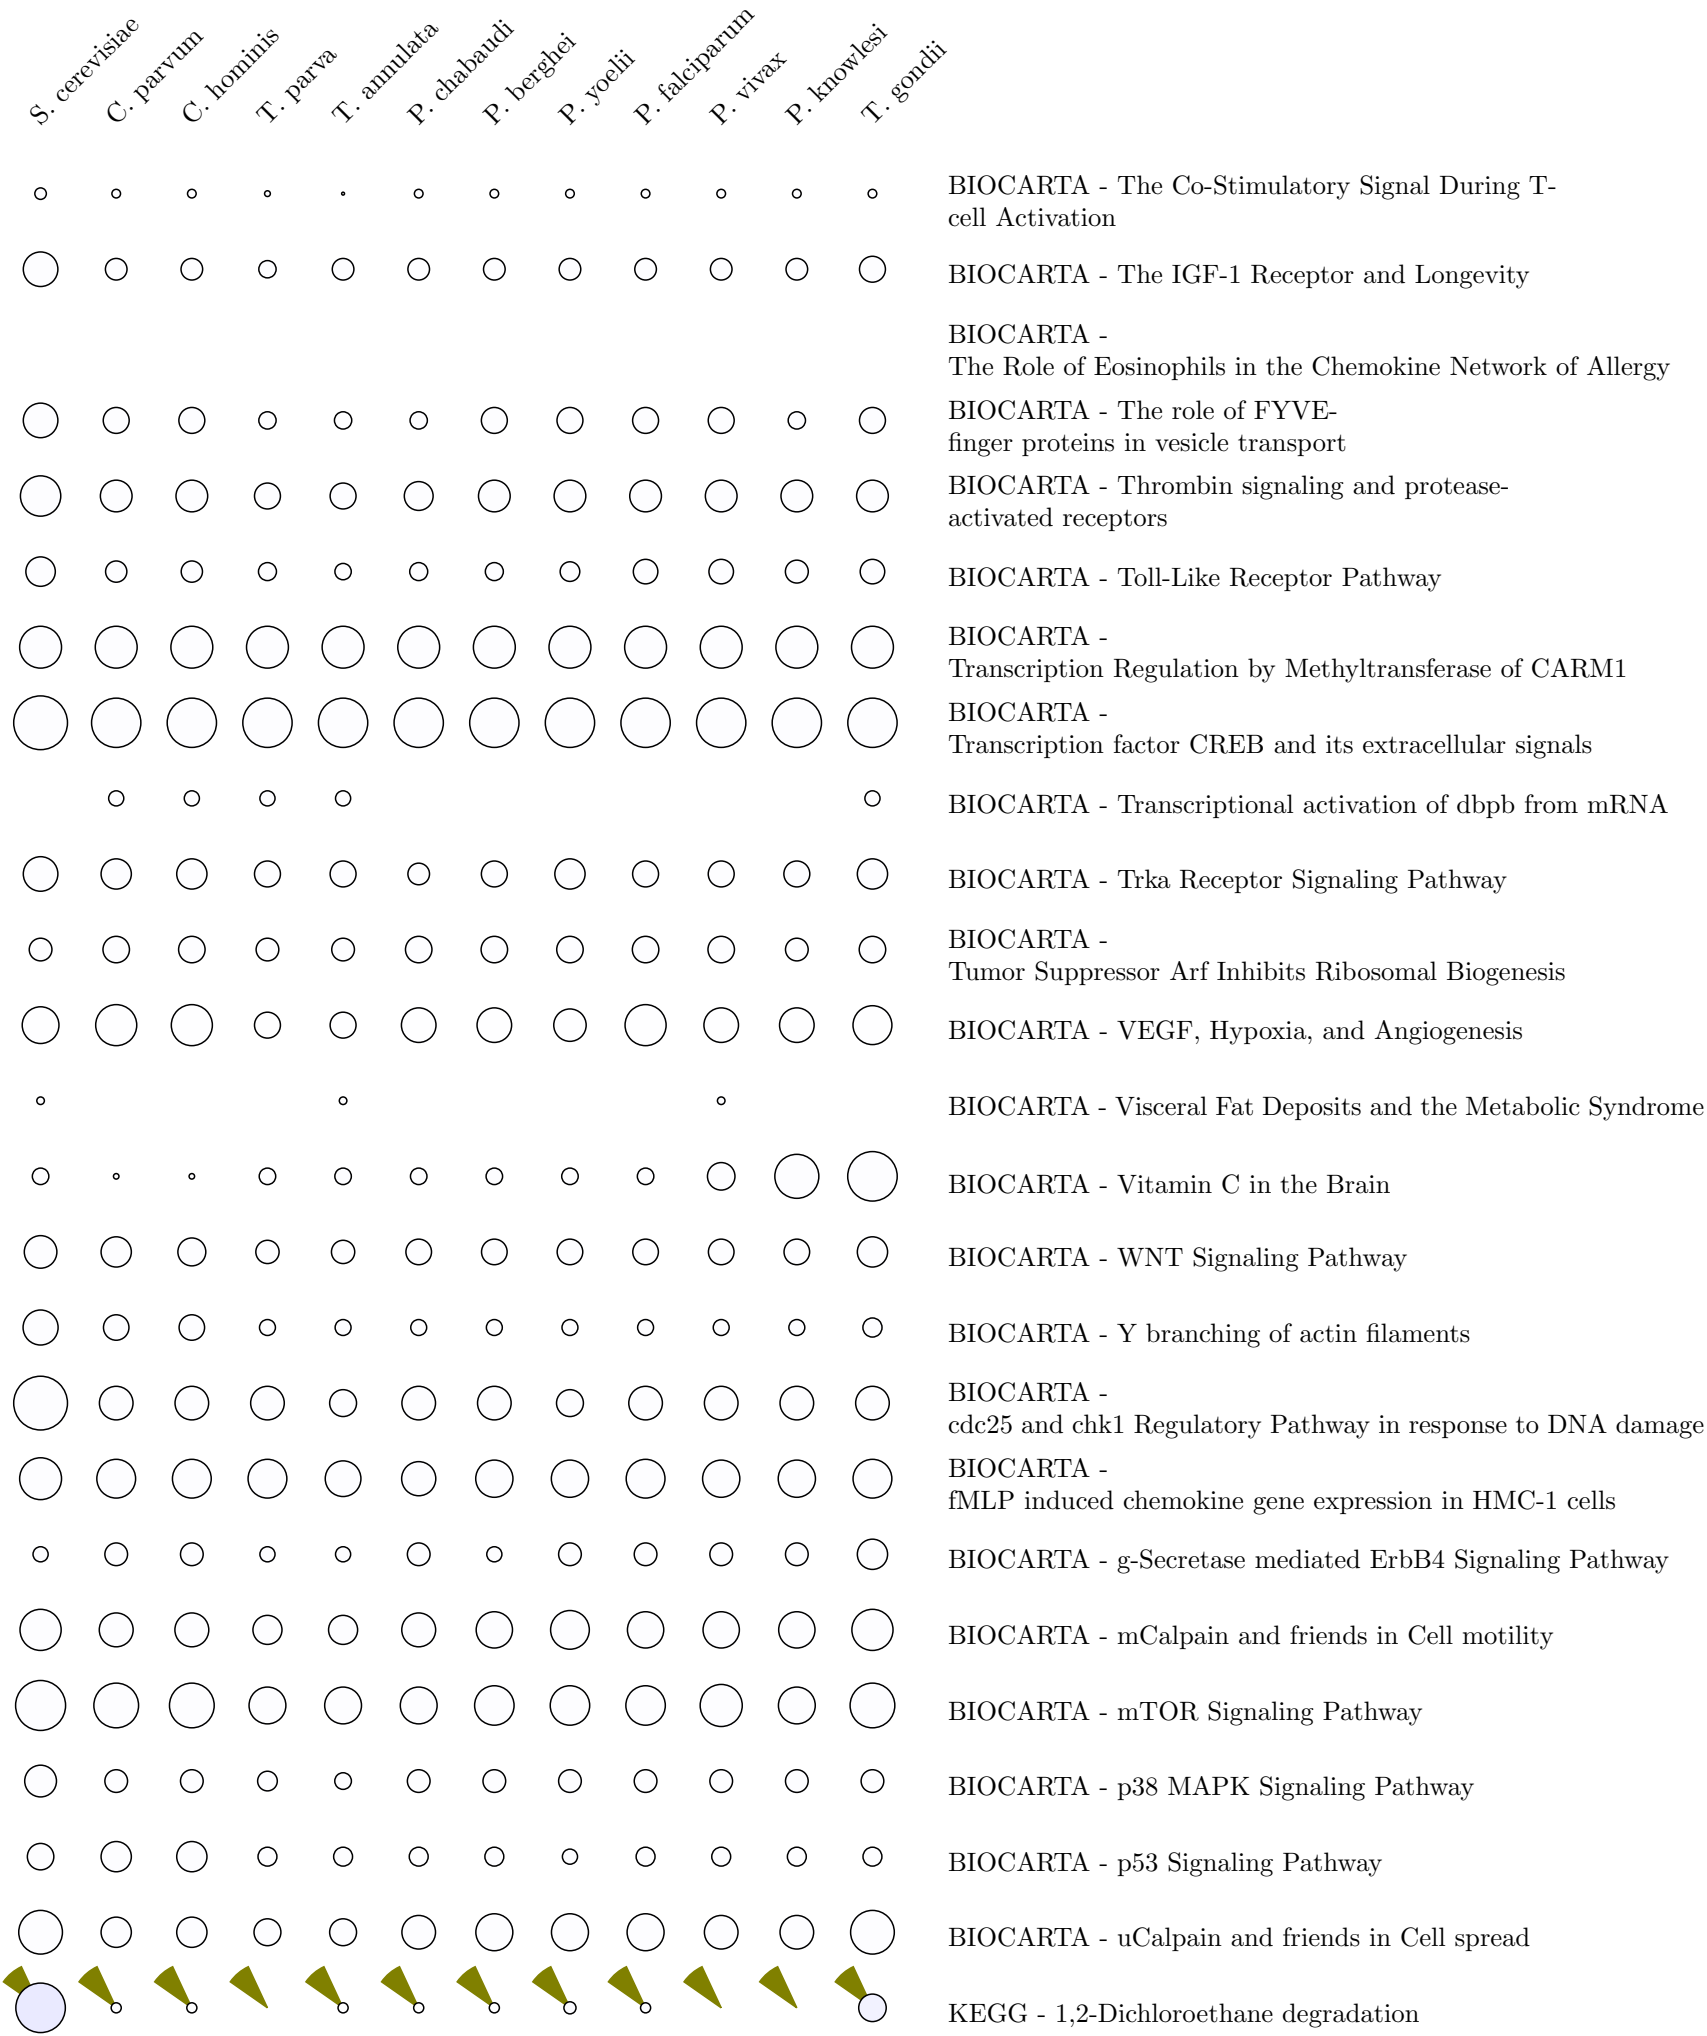



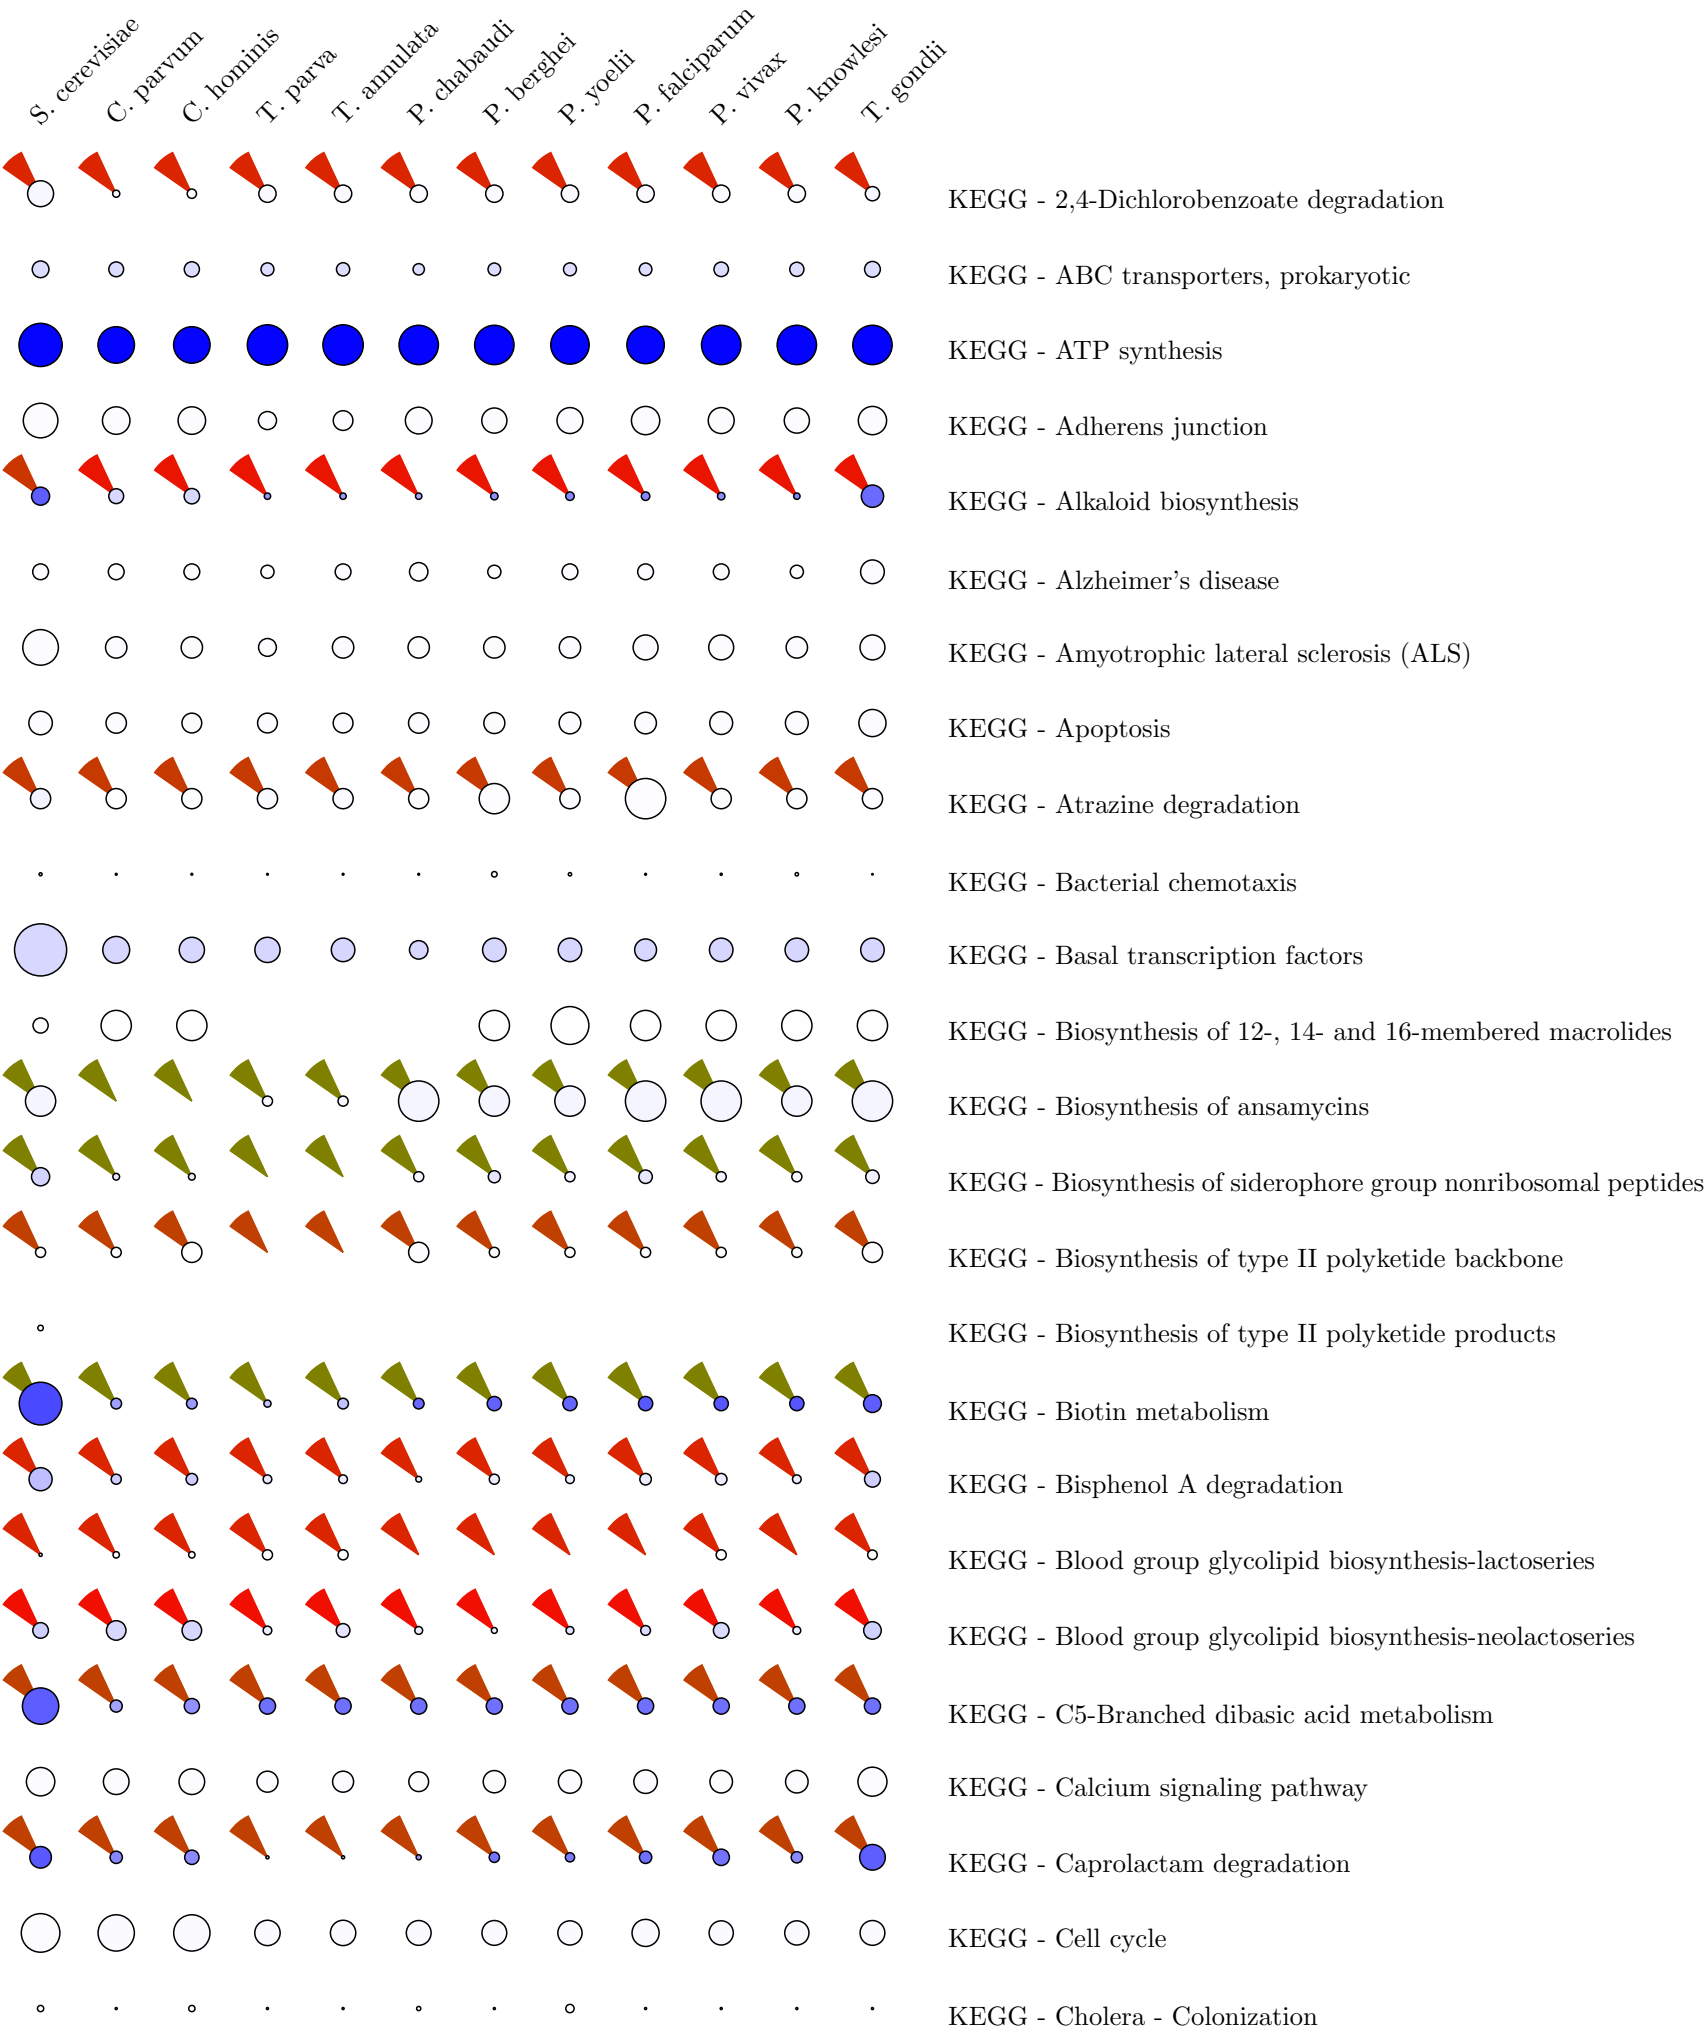

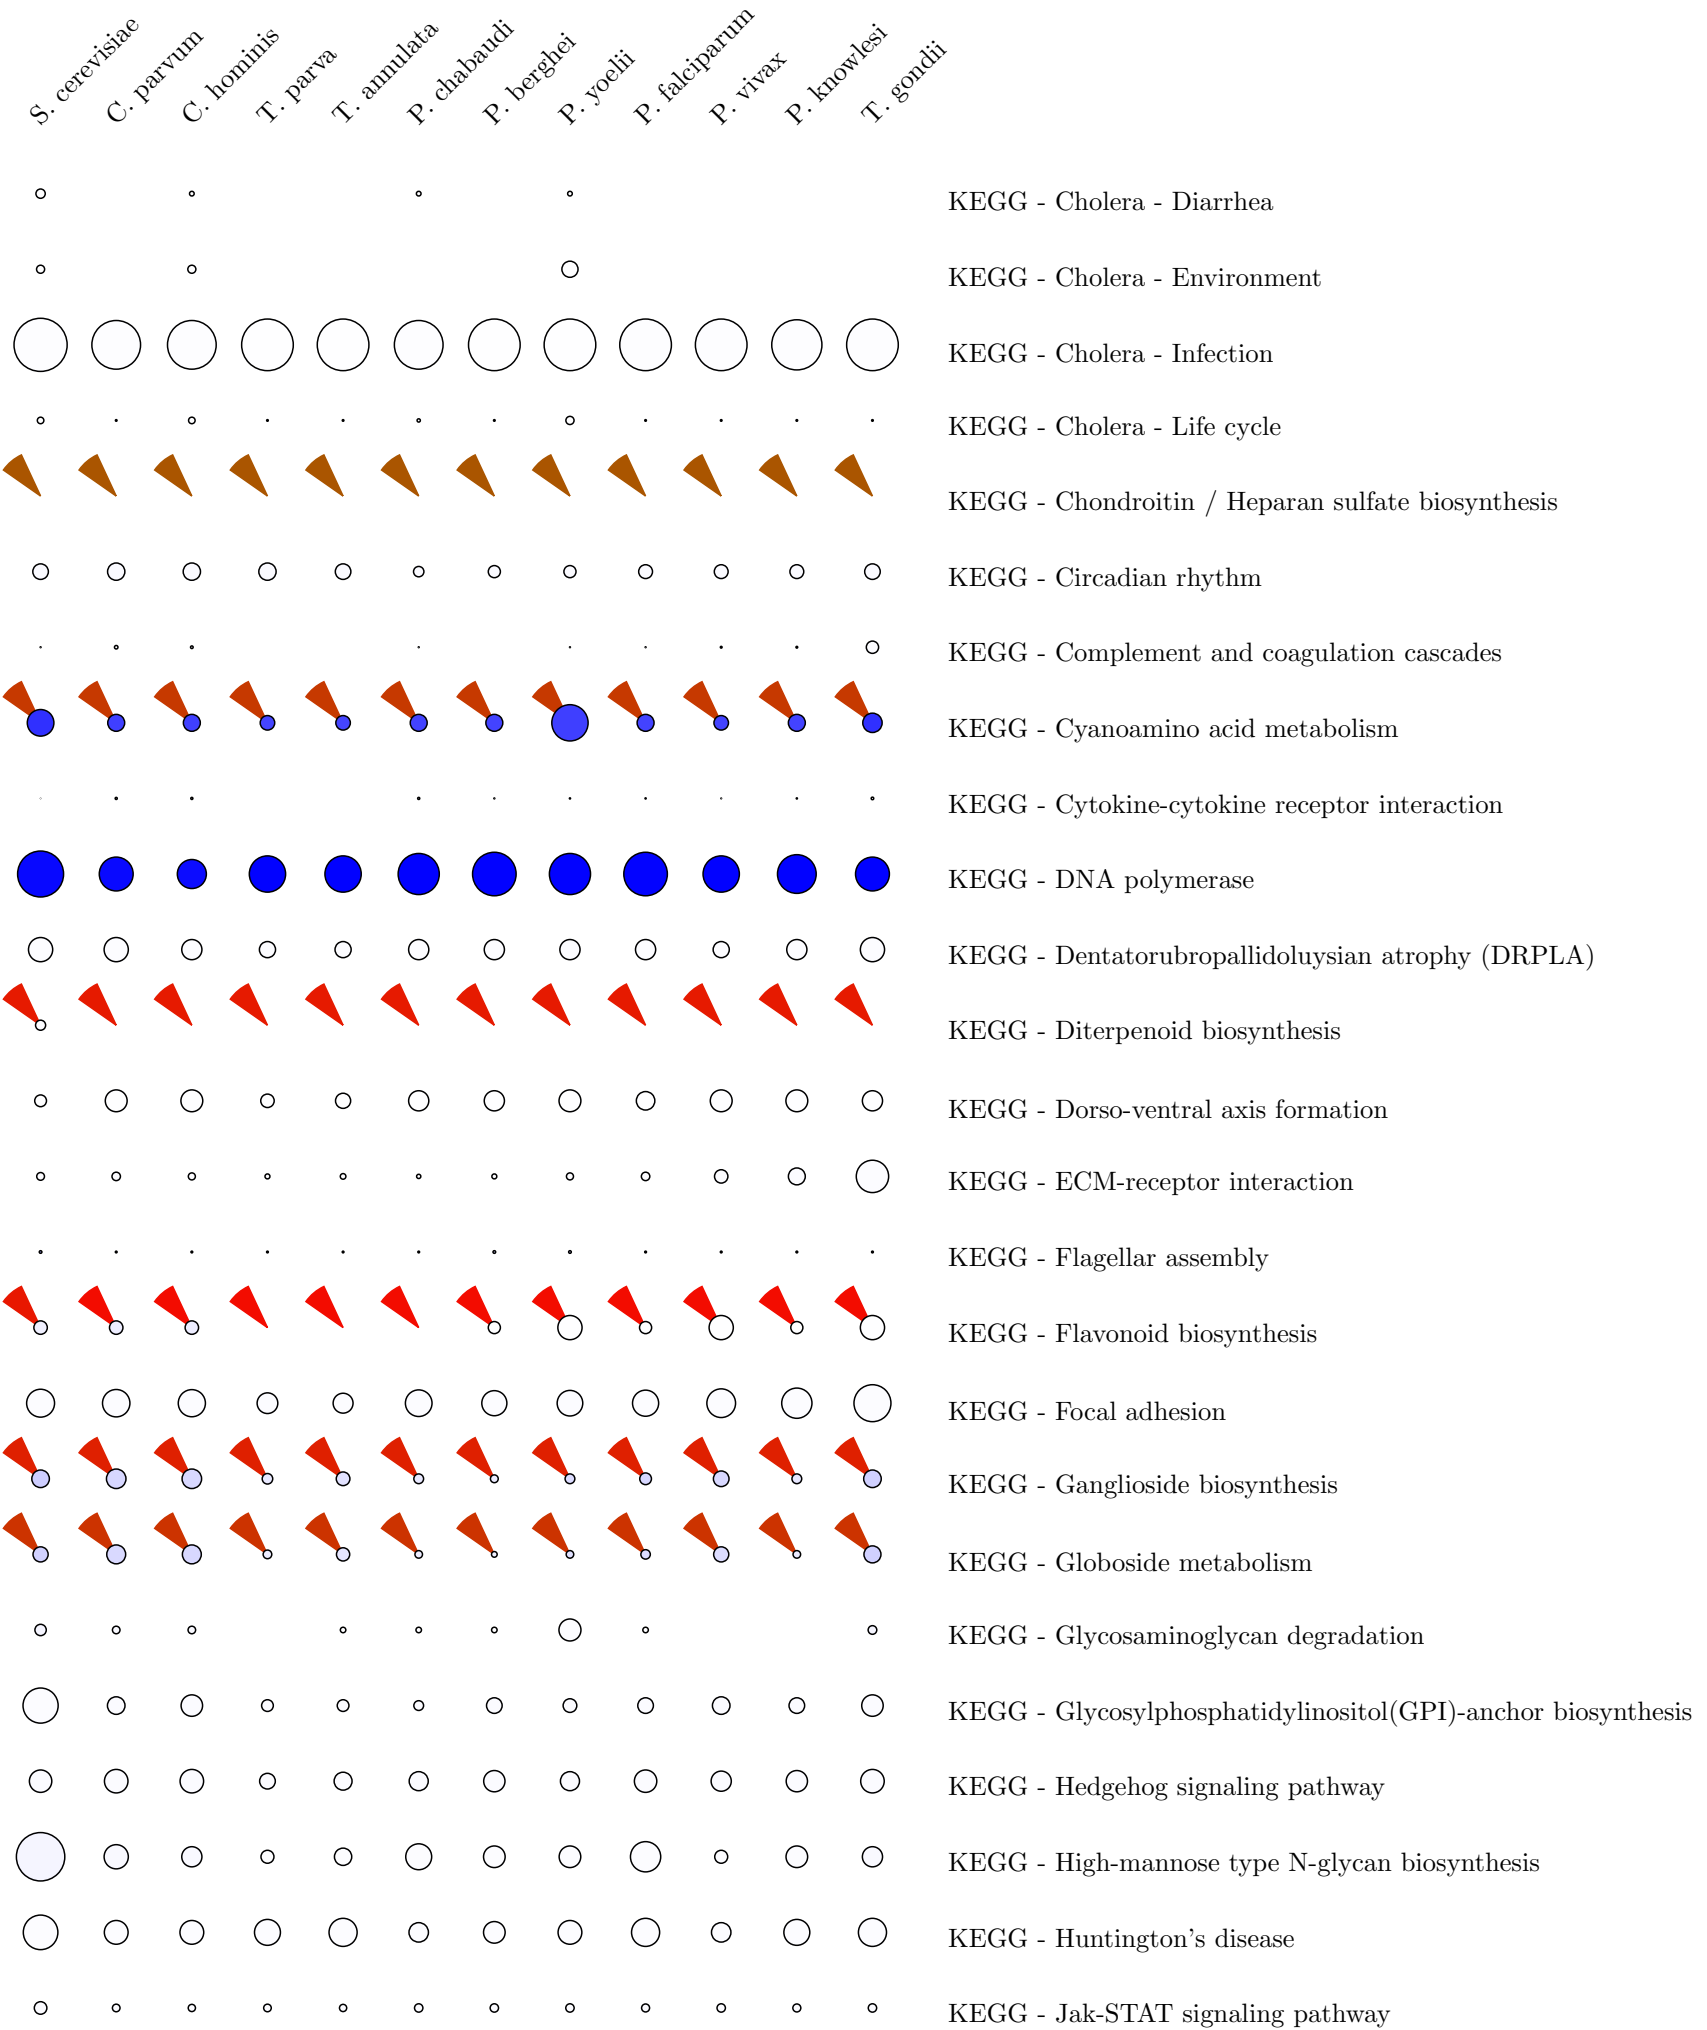

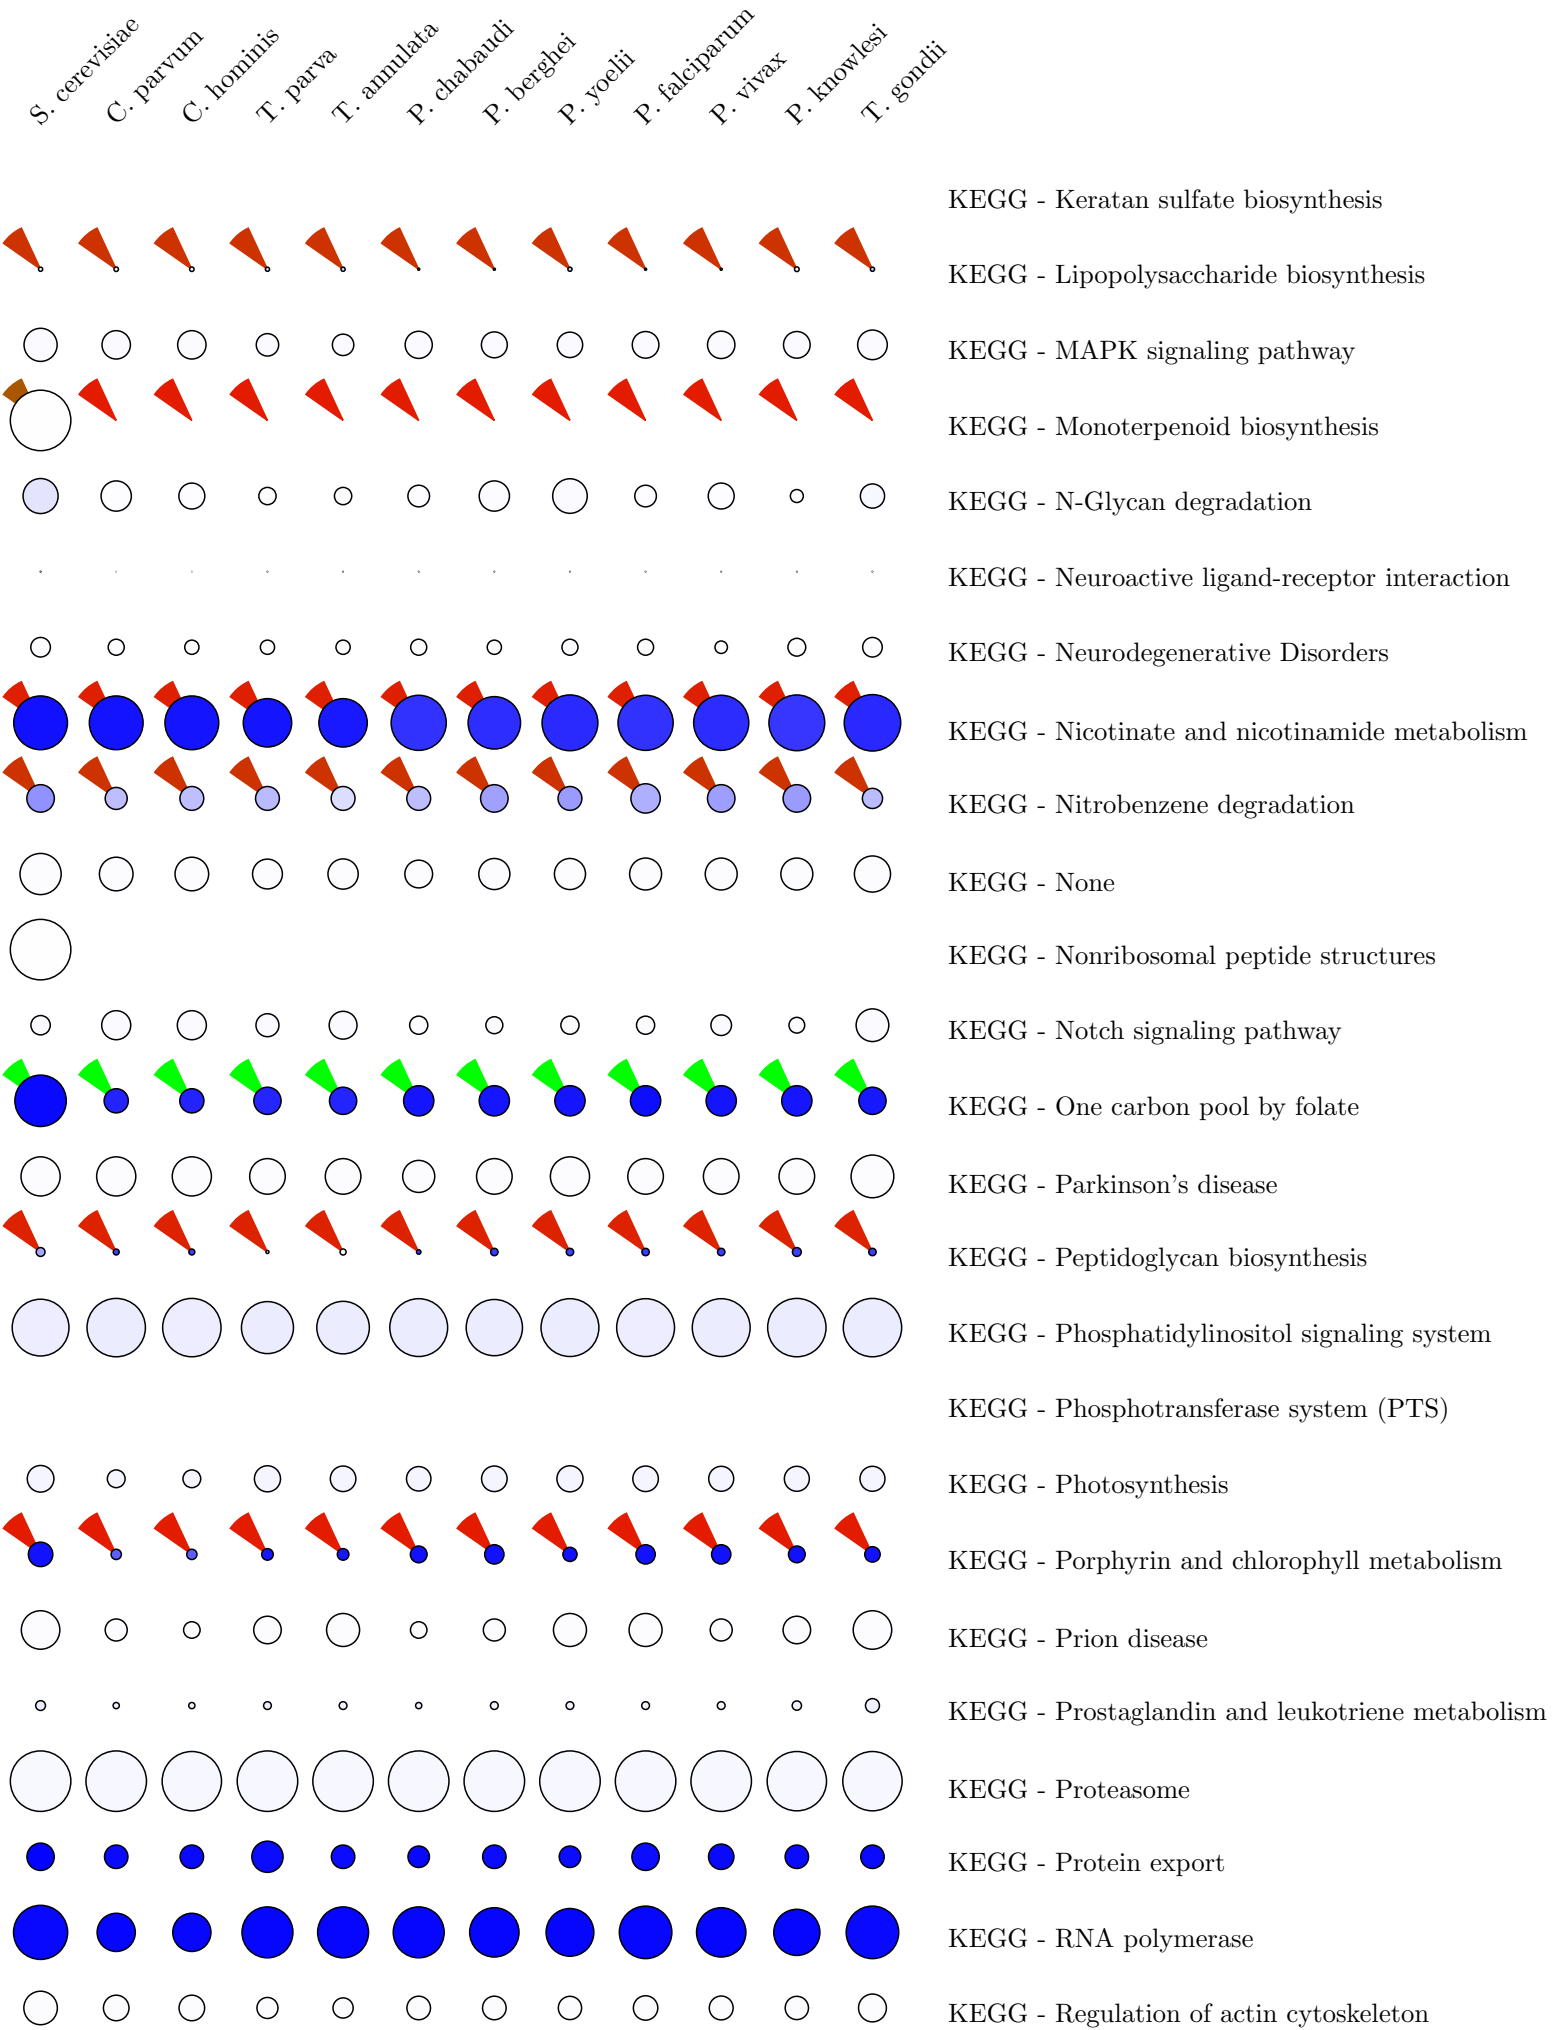

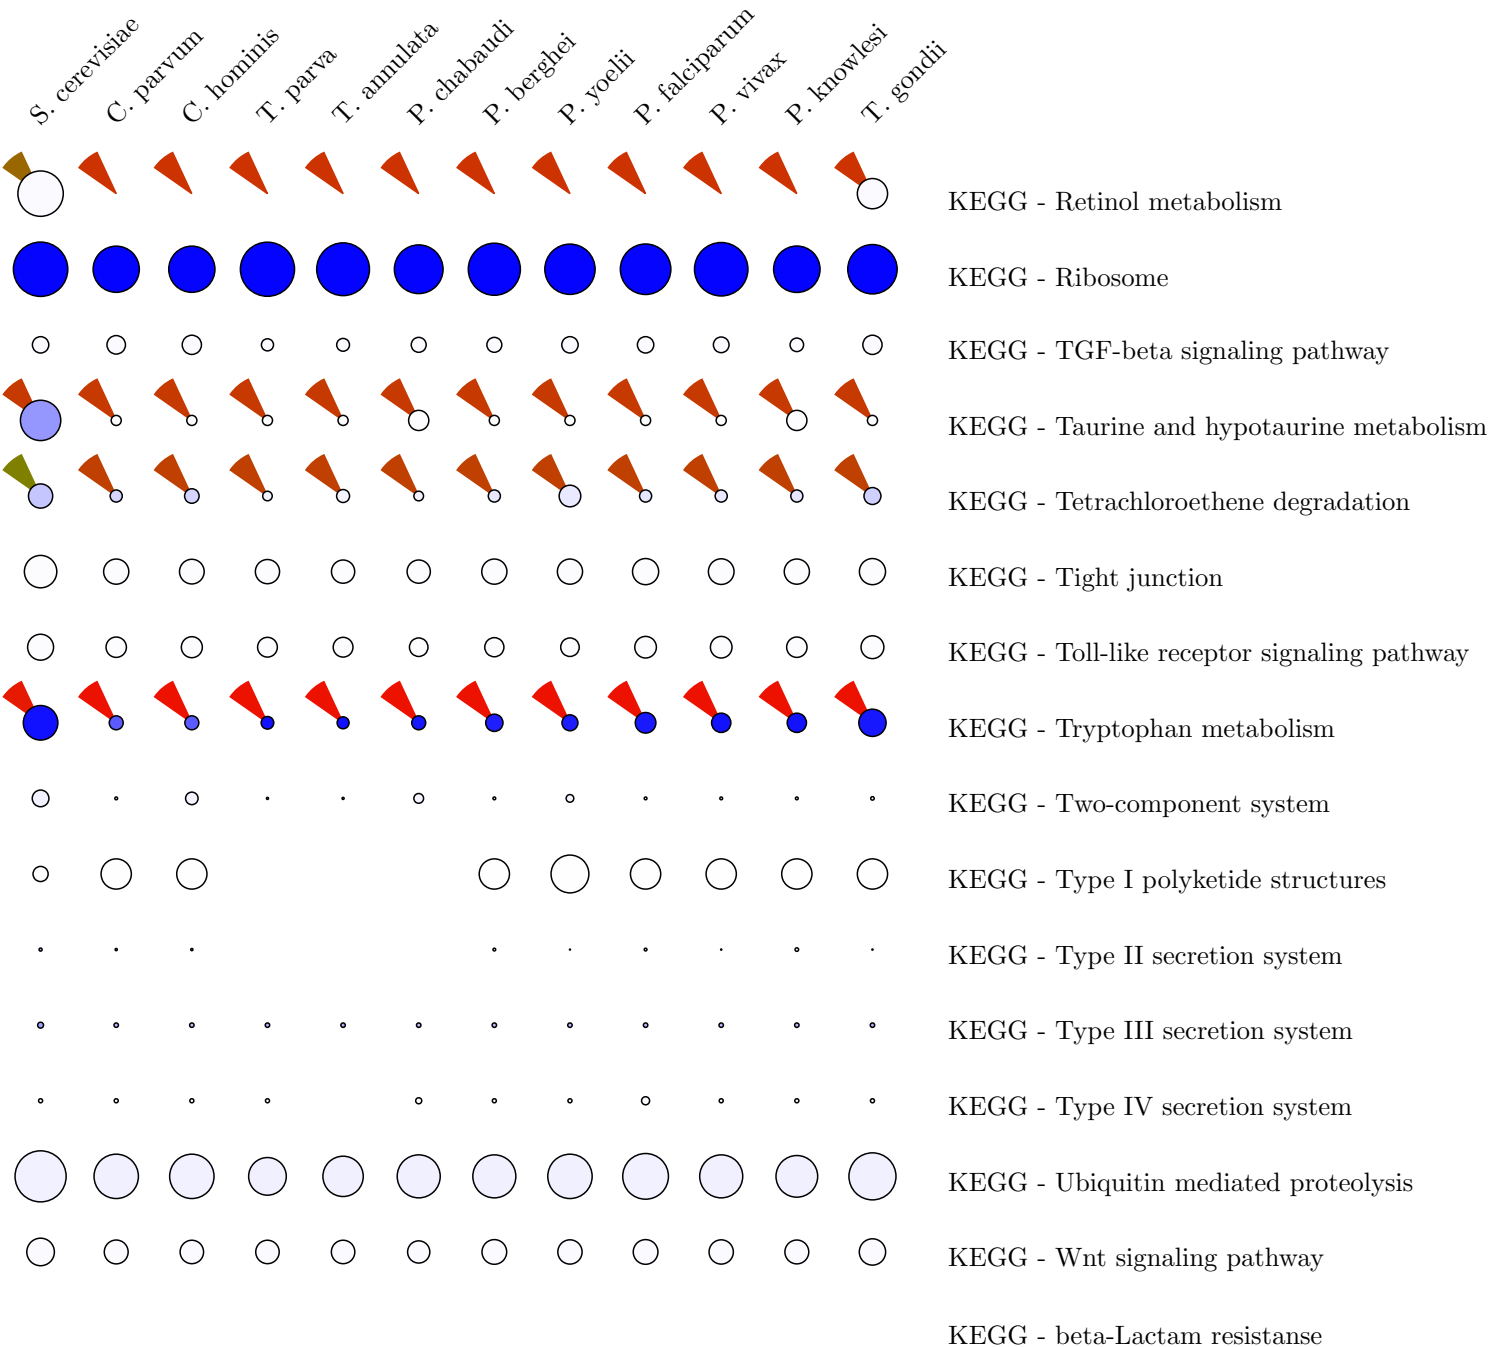

Supplement: f1 [file 832756.f1.zip]
