# Supplementary material for: Comparative Genomics of Cryptosporidium
Source: Int J Genomics. 2013 May 2;2013:832756. doi: 10.1155/2013/832756 (PMC3659464; doi:10.1155/2013/832756)
Supplement: Supplementary file 1 — Supplementary Figure 1: Synteny of Plasmodia and Cryptosporidia genus Position of the orthologs identified in the genomes of C. parvum, P. falciparum, P. knowlesi and P. vivax. For each pair of species, a green cross denotes an ortholog present in the same strand in both genomes, while a red cross denotes an inversion. Supplementary Figure 2: Genome Compactness Comparison of the genome compactness of well-studied apicomplexans, as the average number of putative paralogs per genes. Supplementary Figure 3: Pathway Scores See Figure 1. Supplementary Table 1: Chromosomes Composition Results of the statistical evaluation performed using the Fisher's exact test of the enrichment of the Plasmodia chromosomes in orthologs identified in C. parvum. Values of enrichment are given as the log2 of the ratio between the fraction of orthologs in a given Plasmodium chromosome coming from a same chromosome of C. parvum, and the fraction of orthologs in the whole Plasmodium genome coming from this C. parvum chromosome. A value of 0 (ratio of 1) means that the Plasmodium chromosome contains proportionally as many orthologs from the C. parvum chromosome considered as in the whole genome. The values obtained show that the Plasmodium chromosomes significantly retain the composition of the C. parvum chromosomes. P-values below 0.05 were discarded. Supplementary Table 2: Pathway Scores Completeness, connectedness and support scores of the inferred metabolic pathways of C. hominis and C. parvum, along with nine other apicomplexans and an external reference, S. cerevisiae (see text). Supplementary Table 3: Orthologs Sequence Comparison Results of the pairs of putative orthologs sequences comparisons. Identity: percentage of identity between the two protein sequences. dN/dS: non-synonymous on synonymous substitution rate ratio, or None if undefined (when dS equals to zero). Ti/Tv: transition on transversion ratio. Supplementary Table 4: Protein Localizations Predicted protein localization, bas [file 832756.f1.zip › supplementary_table_2-pathway_scores.xls]

## Sheet: Sheet1
Pathway	S. cerevisiae			C. parvum			C. hominis			T. parva			T. annulata			P. chabaudi			P. berghei			P. yoelii			P. falciparum			P. vivax			P. knowlesi			T. gondii
	Support	Completeness	Connectedness	Support	Completeness	Connectedness	Support	Completeness	Connectedness	Support	Completeness	Connectedness	Support	Completeness	Connectedness	Support	Completeness	Connectedness	Support	Completeness	Connectedness	Support	Completeness	Connectedness	Support	Completeness	Connectedness	Support	Completeness	Connectedness	Support	Completeness	Connectedness	Support	Completeness	Connectedness
KEGG - Citrate cycle (TCA cycle)	224	90	94.4444	166	12	22.2222	161	12	16.6667	227	58	88.8889	227	56	88.8889	227	64	94.4444	227	64	88.8889	227	66	94.4444	226	68	94.4444	227	66	94.4444	227	66	94.4444	227	68	94.4444
KEGG - Fatty acid biosynthesis	229	46.1538	96.875	216	23.0769	12.5	218	23.0769	12.5	116	20.5882	12.5	153	17.6471	12.5	221	30.7692	96.875	229	33.3333	96.875	227	25.641	96.875	224	35.8974	93.75	229	35.8974	96.875	227	33.3333	96.875	226	51.2821	96.875
KEGG - Glutathione metabolism	207	69.0476	88.8889	176	23.8095	33.3333	175	23.8095	33.3333	183	30.9524	77.7778	182	30.9524	77.7778	189	47.619	88.8889	189	59.5238	88.8889	183	52.381	88.8889	189	66.6667	88.8889	190	66.6667	88.8889	189	66.6667	88.8889	190	52.381	88.8889
KEGG - Fatty acid metabolism	203	54.5455	78.5714	192	17.0455	7.14286	192	17.0455	7.14286	140	12.5	7.14286	134	12.5	7.14286	177	15.9091	73.8095	189	21.5909	73.8095	190	18.1818	73.8095	190	20.4545	73.8095	189	22.7273	73.8095	189	20.4545	73.8095	195	43.1818	76.1905
KEGG - Polyketide sugar unit biosynthesis	80	36.3636	100	142	63.6364	100	141	54.5455	100	55	27.2727	50	56	27.2727	50	103	36.3636	50	117	54.5455	50	131	45.4545	50	114	63.6364	50	126	63.6364	50	119	54.5455	50	101	45.4545	50
KEGG - Folate biosynthesis	248	32.8125	70	206	17.1875	30	205	17.1875	30	243	18.75	40	243	18.75	40	240	20.3125	80	248	20.3125	80	245	23.4375	70	247	23.4375	80	248	20.3125	80	248	21.875	80	248	23.4375	90
KEGG - Urea cycle and metabolism of amino groups	215	74.1935	68.1818	190	22.5806	13.6364	189	22.5806	13.6364	40	7.40741	31.8182	40	7.40741	31.8182	214	35.4839	54.5455	215	41.9355	54.5455	215	45.1613	54.5455	214	38.7097	54.5455	214	45.1613	54.5455	213	38.7097	54.5455	210	45.1613	45.4545
KEGG - Glyoxylate and dicarboxylate metabolism	239	54.7619	85.7143	112	7.14286	14.2857	112	7.14286	14.2857	195	19.0476	38.0952	195	19.0476	38.0952	191	30.9524	47.619	194	26.1905	52.381	195	28.5714	47.619	199	30.9524	52.381	199	28.5714	47.619	199	28.5714	52.381	200	30.9524	61.9048
KEGG - Novobiocin biosynthesis	177	71.4286	100	0	0	33.3333	0	0	33.3333	67	35.7143	66.6667	67	35.7143	66.6667	1	25	66.6667	68	35.7143	66.6667	68	35.7143	66.6667	68	35.7143	66.6667	68	35.7143	66.6667	68	35.7143	66.6667	156	57.1429	66.6667
KEGG - Glutamate metabolism	249	84.0909	88.8889	241	22.7273	44.4444	240	22.7273	44.4444	250	34.0909	72.2222	250	34.0909	72.2222	250	38.6364	77.7778	250	45.4545	77.7778	250	47.7273	77.7778	249	47.7273	72.2222	250	47.7273	72.2222	250	47.7273	77.7778	250	52.2727	83.3333
KEGG - Streptomycin biosynthesis	198	61.1111	75	182	50	75	181	50	75	77	22.2222	25	77	22.2222	25	138	22.2222	50	157	38.8889	50	166	44.4444	50	157	50	50	165	55.5556	50	153	38.8889	50	177	44.4444	50
KEGG - Nucleotide sugars metabolism	198	33.3333	64.7059	216	25.4902	64.7059	215	25.4902	64.7059	83	11.7647	23.5294	78	11.7647	23.5294	132	7.84314	23.5294	151	13.7255	41.1765	169	15.6863	41.1765	146	15.6863	41.1765	161	15.6863	41.1765	159	13.7255	41.1765	198	25.4902	41.1765
KEGG - Thiamine metabolism	193	87.5	75	4	50	25	9	50	25	4	20	25	22	16.6667	25	14	25	50	16	12.5	50	182	37.5	75	190	62.5	75	189	62.5	50	192	75	75	22	37.5	50
KEGG - Nitrogen metabolism	213	57.1429	84.6154	199	9.52381	38.4615	197	9.52381	30.7692	91	7.14286	53.8462	95	7.14286	61.5385	217	30.9524	69.2308	216	33.3333	61.5385	215	33.3333	69.2308	215	30.9524	53.8462	216	35.7143	53.8462	216	38.0952	53.8462	216	35.7143	76.9231
KEGG - Alanine and aspartate metabolism	250	85.7143	89.4737	250	25.7143	31.5789	249	25.7143	31.5789	251	45.7143	36.8421	251	45.7143	47.3684	251	42.8571	57.8947	251	54.2857	52.6316	251	54.2857	57.8947	250	54.2857	57.8947	251	54.2857	57.8947	251	54.2857	57.8947	251	65.7143	78.9474
KEGG - Pentose phosphate pathway	246	79.0698	70.8333	221	30.2326	29.1667	220	30.2326	29.1667	244	58.1395	50	244	60.4651	50	247	69.7674	50	245	67.4419	50	247	67.4419	50	245	69.7674	58.3333	247	74.4186	50	247	67.4419	50	247	86.0465	66.6667
KEGG - Stilbene, coumarine and lignin biosynthesis	64	52.6316	38.4615	29	4.67836	38.4615	29	4.67836	38.4615	21	2.92398	15.3846	21	2.33918	15.3846	26	2.92398	15.3846	26	2.92398	15.3846	44	8.18713	15.3846	21	2.92398	15.3846	27	2.92398	15.3846	27	3.50877	15.3846	30	23.3918	15.3846
KEGG - Oxidative phosphorylation	246	53.2468	50	246	31.8182	25	246	31.8182	25	247	46.1039	25	247	48.0519	25	247	51.2987	50	247	49.3506	50	247	50.6494	50	246	48.7013	50	247	49.3506	50	247	48.0519	50	247	47.4026	50
KEGG - Sulfur metabolism	195	95.2381	75	105	25	37.5	105	25	37.5	99	18.75	12.5	85	18.75	12.5	83	18.75	12.5	105	25	12.5	171	23.8095	25	104	25	12.5	105	31.25	12.5	105	25	12.5	192	66.6667	50
KEGG - Methionine metabolism	243	81.8182	76.9231	244	36.3636	7.69231	243	36.3636	7.69231	244	36.3636	7.69231	244	36.3636	7.69231	244	40.9091	23.0769	244	40.9091	23.0769	244	40.9091	23.0769	243	40.9091	23.0769	244	40.9091	30.7692	244	40.9091	23.0769	243	54.5455	61.5385
KEGG - Starch and sucrose metabolism	236	51.25	40.9091	241	37.5	45.4545	240	37.5	45.4545	234	21.25	22.7273	234	20	22.7273	234	17.5	31.8182	236	20	31.8182	236	22.5	31.8182	234	18.75	31.8182	233	18.75	31.8182	233	18.75	31.8182	237	32.5	36.3636
KEGG - Arginine and proline metabolism	250	67.3077	76.3158	237	32.6923	31.5789	215	32.6923	31.5789	250	23.0769	34.2105	249	23.0769	34.2105	250	28.8462	47.3684	250	44.2308	50	250	46.1538	50	249	42.3077	47.3684	250	46.1538	47.3684	250	42.3077	47.3684	244	46.1538	55.2632
KEGG - Styrene degradation	60	30	21.4286	9	11.1111	7.14286	9	22.2222	7.14286	26	15	21.4286	26	15	21.4286	36	25	21.4286	34	25	21.4286	35	25	21.4286	35	25	21.4286	34	15	21.4286	34	25	21.4286	14	22.2222	21.4286
KEGG - Riboflavin metabolism	205	73.3333	100	9	33.3333	25	14	33.3333	25	15	26.6667	25	23	13.3333	25	21	20	50	21	20	50	20	26.6667	25	23	33.3333	50	22	26.6667	50	20	26.6667	25	16	33.3333	50
KEGG - Purine metabolism	250	87.3333	72	251	58.6667	24	250	54.6667	24	251	63.3333	36	251	63.3333	36	251	67.3333	36	251	68	40	251	66.6667	40	250	73.3333	36	251	68	32	251	68	40	251	73.3333	44
KEGG - O-Glycan biosynthesis	45	22.8571	14.2857	38	54.2857	28.5714	39	54.2857	28.5714	18	14.2857	14.2857	25	23.3333	14.2857	18	13.3333	14.2857	15	13.3333	14.2857	30	16.6667	14.2857	35	20	14.2857	34	26.6667	14.2857	20	16.6667	14.2857	45	54.2857	28.5714
KEGG - Ubiquinone biosynthesis	203	23.6842	50	182	10.5263	37.5	118	10.5263	37.5	195	13.1579	50	197	13.1579	50	198	21.0526	50	193	13.1579	50	194	15.7895	50	188	10.5263	50	190	13.1579	50	192	13.1579	50	190	13.1579	50
KEGG - Glycine, serine and threonine metabolism	250	60.9756	91.1765	250	21.9512	61.7647	249	21.9512	61.7647	250	18.2927	44.1176	250	17.0732	50	251	26.8293	44.1176	251	23.1707	44.1176	251	25.6098	44.1176	250	23.1707	44.1176	251	26.8293	44.1176	251	28.0488	44.1176	251	42.6829	91.1765
KEGG - Valine, leucine and isoleucine degradation	220	30.8511	63.1579	68	7.44681	10.5263	68	7.44681	10.5263	74	8.51064	5.26316	73	7.44681	5.26316	162	12.766	21.0526	167	14.8936	15.7895	174	17.0213	26.3158	173	20.2128	21.0526	168	19.1489	21.0526	168	19.1489	21.0526	222	39.3617	63.1579
KEGG - D-Arginine and D-ornithine metabolism	0	0	25	0	0	25	0	0	25	0	0	25	0	0	25	0	0	25	3	100	50	3	100	50	0	0	25	7	50	50	2	50	50	0	0	25
KEGG - Carbazole degradation	10	40	33.3333	0	0	22.2222	0	0	22.2222	0	0	33.3333	0	0	33.3333	0	0	33.3333	0	0	33.3333	0	0	33.3333	0	0	33.3333	0	0	33.3333	0	0	33.3333	0	0	33.3333
KEGG - Biphenyl degradation	5	25	30	1	33.3333	20	1	33.3333	20	0	0	30	0	0	30	0	0	30	0	0	30	0	0	30	0	0	30	0	0	30	0	0	30	3	25	30
KEGG - 1,1,1-Trichloro-2,2-bis(4-chlorophenyl)ethane (DDT) degradation	20	33.3333	20	5	50	20	5	50	20	1	50	10	1	33.3333	10	0	0	10	4	33.3333	10	3	33.3333	10	1	50	10	4	33.3333	10	2	33.3333	10	4	25	10
KEGG - Pyrimidine metabolism	250	84.6154	73.3333	251	62.6374	46.6667	250	61.5385	46.6667	251	68.1319	33.3333	251	70.3297	33.3333	251	70.3297	33.3333	251	68.1319	33.3333	251	64.8352	33.3333	250	71.4286	33.3333	251	69.2308	33.3333	251	65.9341	33.3333	251	73.6264	66.6667
KEGG - Phenylalanine, tyrosine and tryptophan biosynthesis	249	75	92.8571	250	20.4545	14.2857	249	18.1818	14.2857	250	27.2727	21.4286	250	27.2727	21.4286	250	25	21.4286	250	36.3636	21.4286	250	36.3636	21.4286	249	36.3636	21.4286	250	31.8182	21.4286	250	34.0909	21.4286	250	43.1818	42.8571
KEGG - gamma-Hexachlorocyclohexane degradation	119	85.5856	35	38	2.7027	10	39	4.5045	10	22	2.7027	15	20	4.5977	25	39	3.6036	25	39	4.5045	20	39	4.5045	20	38	4.5045	10	39	5.40541	10	38	4.5045	25	66	34.2342	25
KEGG - Toluene and xylene degradation	13	42.8571	13.6364	5	16.6667	4.54545	5	16.6667	4.54545	1	25	13.6364	2	25	13.6364	2	25	13.6364	2	25	13.6364	2	25	13.6364	0	0	13.6364	0	0	13.6364	2	25	13.6364	10	42.8571	13.6364
KEGG - D-Alanine metabolism	43	12.5	40	0	0	20	0	0	20	0	0	20	0	0	20	0	0	20	3	20	40	3	20	40	0	0	20	7	12.5	40	2	12.5	40	0	0	20
KEGG - Propanoate metabolism	242	34.5238	29.1667	220	14.2857	16.6667	210	16.6667	12.5	231	14.2857	20.8333	231	13.0952	20.8333	237	17.8571	12.5	238	20.2381	20.8333	238	21.4286	25	237	22.619	25	238	26.1905	25	238	21.4286	25	243	41.6667	33.3333
KEGG - Tyrosine metabolism	228	33.3333	17.3913	195	19.6078	17.3913	194	20.5882	17.3913	135	19.6078	8.69565	125	19.6078	8.69565	115	17.6471	8.69565	173	21.5686	8.69565	179	20.5882	8.69565	154	23.5294	8.69565	174	21.5686	8.69565	176	21.5686	8.69565	211	28.4314	17.3913
KEGG - Valine, leucine and isoleucine biosynthesis	248	75.6757	75	247	18.9189	16.6667	246	18.9189	16.6667	248	32.4324	16.6667	248	32.4324	16.6667	248	35.1351	25	248	35.1351	25	248	35.1351	25	247	32.4324	25	248	35.1351	25	248	32.4324	25	249	48.6486	33.3333
KEGG - N-Glycan biosynthesis	68	55.3191	35.7143	58	38.2979	28.5714	58	36.1702	28.5714	48	21.2766	21.4286	52	23.4043	21.4286	31	23.4043	21.4286	37	29.7872	21.4286	69	29.7872	21.4286	74	36.1702	21.4286	73	27.6596	21.4286	57	31.9149	21.4286	73	34.0426	21.4286
KEGG - Cysteine metabolism	242	81.4815	72.7273	241	25.9259	27.2727	240	25.9259	27.2727	240	33.3333	27.2727	241	33.3333	27.2727	240	25.9259	27.2727	240	33.3333	27.2727	240	40.7407	36.3636	239	33.3333	36.3636	241	33.3333	45.4545	240	33.3333	36.3636	243	66.6667	45.4545
KEGG - beta-Alanine metabolism	186	35.1852	47.619	10	10	9.52381	10	10	9.52381	3	4.7619	9.52381	2	6.66667	9.52381	114	9.25926	14.2857	141	16.6667	14.2857	136	12.963	14.2857	138	18.5185	14.2857	141	20.3704	14.2857	141	18.5185	14.2857	171	29.6296	42.8571
KEGG - Ascorbate and aldarate metabolism	133	87.2549	30.7692	65	6.31579	15.3846	65	6.31579	15.3846	22	8.82353	7.69231	19	8.82353	7.69231	14	4.21053	7.69231	20	7.84314	7.69231	19	7.84314	7.69231	20	7.84314	15.3846	19	7.84314	7.69231	20	8.82353	7.69231	97	45.098	7.69231
KEGG - Inositol phosphate metabolism	187	96	54.5455	35	95	36.3636	38	95	36.3636	29	84	36.3636	29	84	36.3636	34	96	45.4545	35	93	45.4545	38	97	45.4545	35	96	45.4545	34	96	45.4545	33	97	45.4545	139	94	36.3636
KEGG - Glycerolipid metabolism	221	56.1404	38.4615	189	24.5614	30.7692	188	24.5614	30.7692	174	12.2807	30.7692	175	15.7895	30.7692	192	17.5439	46.1538	189	21.0526	38.4615	181	21.0526	30.7692	190	21.0526	38.4615	188	22.807	38.4615	183	19.2982	38.4615	183	50.8772	38.4615
KEGG - 1,4-Dichlorobenzene degradation	22	27.2727	16.6667	11	18.1818	11.1111	11	27.2727	11.1111	9	40	16.6667	9	40	16.6667	9	20	16.6667	9	40	16.6667	9	40	16.6667	9	40	16.6667	9	40	16.6667	8	40	16.6667	1	20	16.6667
KEGG - Synthesis and degradation of ketone bodies	108	57.1429	83.3333	13	12.5	33.3333	12	12.5	33.3333	4	8.33333	33.3333	8	12.5	33.3333	101	21.4286	33.3333	107	35.7143	33.3333	106	35.7143	33.3333	107	35.7143	33.3333	107	35.7143	33.3333	107	35.7143	33.3333	109	71.4286	83.3333
KEGG - Methane metabolism	186	27.1605	50	182	8.64198	25	182	8.64198	25	179	7.40741	25	179	7.40741	25	180	7.40741	33.3333	180	7.40741	33.3333	180	7.40741	33.3333	179	7.40741	33.3333	180	7.40741	33.3333	180	7.40741	33.3333	184	16.0494	25
KEGG - Terpenoid biosynthesis	236	84	69.2308	235	40	46.1538	130	32	46.1538	235	16	46.1538	233	20	53.8462	224	16	53.8462	235	40	53.8462	147	36	53.8462	136	20	53.8462	119	24	53.8462	129	16	46.1538	183	44	46.1538
KEGG - Reductive carboxylate cycle (CO2 fixation)	214	50	36.3636	202	36.1111	81.8182	195	22.2222	36.3636	214	38.8889	36.3636	214	38.8889	36.3636	223	44.4444	63.6364	222	44.4444	63.6364	222	41.6667	63.6364	221	41.6667	63.6364	222	41.6667	63.6364	222	41.6667	63.6364	216	44.4444	36.3636
KEGG - Glycerophospholipid metabolism	242	53.1646	90.9091	225	40.5063	77.2727	223	40.5063	77.2727	238	35.443	77.2727	238	39.2405	72.7273	228	40.5063	72.7273	228	43.038	72.7273	228	40.5063	68.1818	226	41.7722	72.7273	227	41.7722	72.7273	223	39.2405	68.1818	234	48.1013	77.2727
KEGG - Aminophosphonate metabolism	163	56.4103	60	99	46.1538	30	97	46.1538	30	112	41.0256	20	75	46.1538	20	119	48.7179	30	131	48.7179	20	141	48.7179	30	117	56.4103	20	135	53.8462	20	137	53.8462	30	152	43.5897	40
KEGG - Indole and ipecac alkaloid biosynthesis	0	0	20	0	0	20	0	0	20	0	0	20	0	0	20	0	0	20	0	0	20	0	0	20	0	0	20	0	0	20	0	0	20	1	25	60
KEGG - Pentose and glucuronate interconversions	201	90.625	30.4348	141	15.625	13.0435	140	15.625	13.0435	23	55.1724	8.69565	25	51.7241	8.69565	200	37.5	8.69565	201	46.875	8.69565	202	46.875	8.69565	202	53.125	8.69565	200	50	8.69565	201	50	8.69565	201	56.25	8.69565
KEGG - Fluorene degradation	71	83.6957	20.8333	1	4.16667	8.33333	1	4.16667	8.33333	1	1.19048	12.5	1	1.19048	12.5	0	0	12.5	0	0	12.5	0	0	12.5	0	0	12.5	2	1.19048	12.5	2	2.38095	12.5	17	39.1304	12.5
KEGG - D-Glutamine and D-glutamate metabolism	29	37.5	37.5	2	25	25	1	25	25	0	0	25	0	0	25	28	37.5	25	28	37.5	37.5	28	37.5	25	29	37.5	37.5	28	37.5	25	27	37.5	25	29	37.5	37.5
KEGG - Benzoate degradation via hydroxylation	111	15.5556	19.2308	6	2.22222	7.69231	6	2.22222	7.69231	8	5.71429	11.5385	6	2.85714	11.5385	80	11.1111	11.5385	47	8.88889	11.5385	52	6.66667	11.5385	47	6.66667	11.5385	56	4.44444	11.5385	58	6.66667	11.5385	94	11.1111	11.5385
KEGG - Inositol metabolism	93	33.3333	66.6667	91	25	33.3333	91	16.6667	33.3333	91	16.6667	33.3333	91	16.6667	33.3333	91	16.6667	33.3333	91	16.6667	33.3333	91	16.6667	33.3333	91	16.6667	33.3333	91	16.6667	33.3333	91	16.6667	33.3333	93	33.3333	66.6667
KEGG - Vitamin B6 metabolism	164	58.3333	66.6667	4	40	33.3333	9	36.3636	33.3333	0	0	33.3333	1	12.5	33.3333	5	22.2222	33.3333	22	20	33.3333	27	18.1818	33.3333	29	18.1818	33.3333	39	16.6667	33.3333	25	20	33.3333	138	25	66.6667
KEGG - Glycosphingolipid metabolism	74	27.1186	55.5556	53	18.6441	22.2222	55	16.9492	22.2222	52	13.5593	22.2222	56	13.5593	22.2222	38	18.6441	22.2222	31	18.6441	22.2222	64	20.339	22.2222	74	20.339	22.2222	72	16.9492	22.2222	52	18.6441	22.2222	67	27.1186	55.5556
KEGG - 3-Chloroacrylic acid degradation	25	50	33.3333	4	33.3333	33.3333	4	33.3333	33.3333	0	0	16.6667	1	16.6667	16.6667	3	33.3333	33.3333	3	16.6667	33.3333	3	33.3333	33.3333	3	33.3333	33.3333	3	16.6667	33.3333	3	16.6667	33.3333	3	16.6667	33.3333
KEGG - Lysine degradation	230	42.1687	47.0588	221	19.2771	17.6471	220	19.2771	11.7647	219	20.4819	11.7647	219	20.4819	11.7647	228	26.506	17.6471	229	27.7108	17.6471	229	25.3012	17.6471	228	30.1205	17.6471	229	27.7108	17.6471	229	28.9157	17.6471	229	40.9639	35.2941
KEGG - Lysine biosynthesis	226	60.8696	56.25	188	13.0435	18.75	188	13.0435	18.75	188	13.0435	18.75	188	13.0435	18.75	200	17.3913	18.75	207	17.3913	25	200	17.3913	25	197	17.3913	18.75	199	17.3913	18.75	198	17.3913	18.75	228	47.8261	37.5
KEGG - Benzoate degradation via CoA ligation	210	89.2473	15.3846	121	86.0215	15.3846	122	86.0215	15.3846	182	77.4194	15.3846	184	77.4194	15.3846	197	90.3226	23.0769	203	87.0968	15.3846	200	91.3978	15.3846	199	90.3226	15.3846	196	90.3226	15.3846	198	91.3978	15.3846	208	93.5484	30.7692
KEGG - Ethylbenzene degradation	64	29.0909	40	30	26.5306	40	31	28.5714	40	38	10.9091	40	32	10.9091	40	38	12.2449	40	42	10.9091	40	45	12.7273	40	43	12.7273	40	44	12.7273	40	47	10.9091	40	62	27.2727	60
KEGG - Butanoate metabolism	238	41.3462	30.4348	194	15.3846	17.3913	193	14.4231	13.0435	213	12.5	13.0435	215	12.5	13.0435	227	15.3846	17.3913	230	21.1538	17.3913	229	19.2308	17.3913	228	25	17.3913	228	20.1923	17.3913	229	20.1923	17.3913	230	42.3077	26.087
KEGG - Aminoacyl-tRNA biosynthesis	248	97.619	8.06452	249	83.3333	4.83871	248	85.7143	4.83871	249	92.8571	4.83871	249	95.2381	4.83871	249	92.8571	8.06452	249	90.4762	8.06452	249	92.8571	8.06452	248	92.8571	8.06452	249	95.2381	8.06452	249	95.2381	8.06452	249	85.7143	4.83871
KEGG - Penicillins and cephalosporins biosynthesis	1	50	16.6667	1	20	16.6667	1	20	16.6667	1	50	16.6667	1	50	16.6667	0	0	16.6667	0	0	16.6667	0	0	16.6667	0	0	16.6667	0	0	16.6667	0	0	16.6667	15	22.2222	33.3333
KEGG - Galactose metabolism	221	54.3478	50	212	45.6522	27.7778	211	34.7826	27.7778	143	15.2174	11.1111	140	15.2174	11.1111	149	13.0435	22.2222	161	17.3913	27.7778	166	13.0435	44.4444	169	17.3913	27.7778	160	17.3913	27.7778	151	17.3913	27.7778	210	43.4783	66.6667
KEGG - Phenylalanine metabolism	201	20	22.5806	49	6.66667	16.129	46	7.77778	16.129	113	10	12.9032	112	10	12.9032	77	7.77778	12.9032	122	10	16.129	125	11.1111	16.129	119	11.1111	16.129	120	10	16.129	123	10	16.129	187	13.3333	12.9032
KEGG - Biosynthesis of steroids	191	67.3469	41.9355	140	16.3265	22.5806	142	16.3265	22.5806	218	22.449	22.5806	207	18.3673	25.8065	186	16.3265	19.3548	230	28.5714	25.8065	230	44.898	25.8065	224	20.4082	25.8065	221	24.4898	25.8065	218	20.4082	22.5806	230	32.6531	22.5806
KEGG - 1- and 2-Methylnaphthalene degradation	193	31.25	12.5	176	15.625	12.5	174	15.625	12.5	49	9.375	6.25	47	9.375	6.25	57	9.375	12.5	70	9.375	12.5	75	10.9375	12.5	69	10.9375	12.5	68	9.375	12.5	73	9.375	12.5	152	20.3125	12.5
KEGG - Aminosugars metabolism	218	52.7778	50	219	30.5556	25	217	30.5556	50	216	25	25	215	25	25	216	19.4444	50	216	22.2222	50	215	36.1111	25	214	25	25	215	25	50	217	25	50	217	30.5556	50
KEGG - Glycolysis / Gluconeogenesis	249	83.75	88.4615	247	63.75	76.9231	246	63.75	76.9231	250	66.25	76.9231	250	63.75	76.9231	250	60	76.9231	250	67.5	80.7692	250	67.5	80.7692	249	70	80.7692	250	63.75	42.3077	250	66.25	76.9231	250	86.25	88.4615
KEGG - Pantothenate and CoA biosynthesis	234	67.5	100	171	10	33.3333	171	10	33.3333	146	5	11.1111	140	5	33.3333	174	20	33.3333	184	15	33.3333	169	17.5	33.3333	186	17.5	33.3333	180	12.5	33.3333	175	10	33.3333	214	30	66.6667
KEGG - Bile acid biosynthesis	175	57.6923	33.3333	164	25	22.2222	163	26.9231	22.2222	35	16.6667	22.2222	31	14.5833	22.2222	95	13.4615	22.2222	72	13.4615	22.2222	72	14.5833	22.2222	73	16.6667	22.2222	72	20.8333	22.2222	70	18.75	22.2222	154	50	33.3333
KEGG - Selenoamino acid metabolism	244	65.9091	33.3333	244	43.1818	22.2222	243	43.1818	22.2222	245	45.4545	22.2222	245	45.4545	22.2222	245	45.4545	22.2222	245	50	22.2222	244	45.4545	22.2222	243	52.2727	22.2222	245	50	22.2222	245	50	22.2222	243	56.8182	33.3333
KEGG - C21-Steroid hormone metabolism	12	92.3077	53.8462	2	7.69231	7.69231	2	7.69231	7.69231	0	0	7.69231	1	9.09091	7.69231	0	0	7.69231	0	0	7.69231	0	0	7.69231	0	0	7.69231	3	7.69231	7.69231	0	0	7.69231	6	38.4615	15.3846
KEGG - Carbon fixation	249	68.5714	50	250	50	42.8571	249	50	42.8571	250	47.1429	42.8571	250	47.1429	42.8571	250	57.1429	42.8571	250	61.4286	42.8571	250	62.8571	42.8571	249	64.2857	42.8571	250	61.4286	42.8571	250	62.8571	42.8571	250	70	50
KEGG - Histidine metabolism	230	26.9231	28.5714	223	17.3077	14.2857	224	18.2692	14.2857	233	19.2308	14.2857	228	19.2308	14.2857	207	19.2308	14.2857	210	20.1923	14.2857	216	20.1923	14.2857	207	23.0769	14.2857	218	21.1538	14.2857	216	21.1538	14.2857	212	23.0769	21.4286
KEGG - Pyruvate metabolism	248	84.058	88.2353	245	40.5797	58.8235	244	40.5797	58.8235	248	40.5797	52.9412	248	37.6812	47.0588	248	57.971	58.8235	247	59.4203	58.8235	248	60.8696	58.8235	247	63.7681	58.8235	247	60.8696	58.8235	247	60.8696	58.8235	248	68.1159	70.5882
KEGG - Fructose and mannose metabolism	244	47.2222	75	244	34.7222	65	243	33.3333	45	240	33.3333	50	241	33.3333	50	242	30.5556	50	245	38.8889	55	241	38.8889	60	243	38.8889	50	243	38.8889	55	241	38.8889	55	244	41.6667	65
KEGG - Androgen and estrogen metabolism	54	52.8302	15	46	28.3019	10	46	26.4151	10	41	26.4151	10	29	26.4151	10	46	26.4151	10	58	30.1887	10	61	26.4151	10	46	32.0755	10	59	33.9623	10	60	30.1887	10	44	37.7358	15
KEGG - Limonene and pinene degradation	168	82.0755	15	44	13.2075	10	48	15.0943	10	62	6.60377	10	58	6.60377	10	107	7.54717	10	131	12.2642	10	131	12.2642	10	134	15.0943	10	130	16.0377	10	131	14.1509	10	140	38.6792	15
BIOCARTA - ADP-Ribosylation Factor	2	88.8889		2	83.3333		2	83.3333		2	83.3333		2	83.3333		2	33.3333		2	50		2	50		2	44.4444		2	50		2	55.5556		2	83.3333
BIOCARTA - AKAP95 role in mitosis and chromosome dynamics	2	91.6667		2	75		2	75		2	75		2	75		2	75		2	75		2	75		2	75		2	75		2	75		2	66.6667
BIOCARTA - AKT Signaling Pathway	2	63.1579		2	47.3684		2	47.3684		2	47.3684		2	47.3684		2	36.8421		2	42.1053		2	42.1053		2	47.3684		2	42.1053		2	42.1053		2	47.3684
BIOCARTA - ALK in cardiac myocytes	1	18.9189		1	13.5135		1	13.5135		1	8.10811		1	8.10811		1	13.5135		1	13.5135		1	13.5135		1	13.5135		1	10.8108		1	10.8108		1	13.5135
BIOCARTA - ATM Signaling Pathway	2	50		2	55		2	55		2	55		2	55		2	50		2	45		2	40		2	50		2	50		2	50		2	50
BIOCARTA - Acetylation and Deacetylation of RelA in The Nucleus	2	56.25		2	50		2	50		2	50		2	50		2	37.5		2	43.75		2	43.75		2	56.25		2	50		2	43.75		2	56.25
BIOCARTA - Actions of Nitric Oxide in the Heart	1	48.4848		1	60.6061		1	60.6061		1	54.5455		1	51.5152		1	60.6061		1	57.5758		1	54.5455		1	60.6061		1	54.5455		1	54.5455		1	60.6061
BIOCARTA - Activation of Csk by cAMP-dependent Protein Kinase Inhibits Signaling through the T Cell Receptor	2	41.6667		2	50		2	50		2	41.6667		2	37.5		2	50		2	50		2	50		2	50		2	50		2	50		2	50
BIOCARTA - Activation of PKC through G protein coupled receptor	2	85.7143		2	71.4286		2	71.4286		2	71.4286		2	71.4286		2	28.5714		2	57.1429		2	57.1429		2	71.4286		2	57.1429		2	57.1429		2	71.4286
BIOCARTA - Activation of Src by Protein-tyrosine phosphatase alpha	2	83.3333		2	50		2	50		2	33.3333		2	25		2	41.6667		2	41.6667		2	41.6667		2	41.6667		2	41.6667		2	41.6667		2	41.6667
BIOCARTA - Activation of cAMP-dependent protein kinase, PKA	2	66.6667		2	66.6667		2	66.6667		2	66.6667		2	66.6667		2	66.6667		2	66.6667		2	66.6667		2	66.6667		2	66.6667		2	66.6667		2	66.6667
BIOCARTA - Acute Myocardial Infarction	0	0		1	5		1	5		0	0		0	0		0	0		0	0		0	0		1	5		1	10		1	20		1	45
BIOCARTA - Adhesion Molecules on Lymphocyte	0	0		0	0		0	0		2	11.1111		2	11.1111		0	0		0	0		0	0		0	0		0	0		0	0		2	33.3333
BIOCARTA - Ahr Signal Transduction Pathway	2	25		2	50		2	50		2	25		2	25		2	50		2	50		2	50		2	50		2	50		2	50		2	50
BIOCARTA - Alpha-synuclein and Parkin-mediated proteolysis in Parkinson's disease	2	50		1	50		1	50		1	50		1	50		2	50		2	50		2	50		2	50		0	0		1	50		2	50
BIOCARTA - Alternative Complement Pathway	1	12.5		2	33.3333		2	33.3333		1	12.5		1	12.5		2	22.2222		1	12.5		2	22.2222		1	12.5		2	11.1111		1	25		2	33.3333
BIOCARTA - Angiotensin II mediated activation of JNK Pathway via Pyk2 dependent signaling	2	69.4444		2	52.7778		2	52.7778		2	44.4444		2	41.6667		2	52.7778		2	52.7778		2	52.7778		2	52.7778		2	52.7778		2	52.7778		2	52.7778
BIOCARTA - Angiotensin-converting enzyme 2 regulates heart function	2	7.69231		2	7.69231		2	7.69231		2	7.69231		2	7.69231		2	7.69231		2	7.69231		2	7.69231		2	7.69231		2	23.0769		2	46.1538		2	53.8462
BIOCARTA - Anthrax Toxin Mechanism of Action	1	100		1	100		1	100		1	100		1	100		1	100		1	100		1	100		1	100		1	100		1	100		1	100
BIOCARTA - Antigen Dependent B Cell Activation	0	0		0	0		0	0		0	0		0	0		0	0		0	0		0	0		0	0		0	0		0	0		0	0
BIOCARTA - Apoptotic DNA fragmentation and tissue homeostasis	2	50		2	50		2	50		2	40		2	40		2	40		2	40		2	40		2	40		2	40		2	40		2	50
BIOCARTA - Apoptotic Signaling in Response to DNA Damage	2	45.4545		2	31.8182		2	31.8182		2	31.8182		2	31.8182		2	36.3636		2	36.3636		2	31.8182		2	36.3636		2	36.3636		2	36.3636		2	40.9091
BIOCARTA - Aspirin Blocks Signaling Pathway Involved in Platelet Activation	1	59.0909		1	54.5455		1	54.5455		1	40.9091		1	40.9091		1	50		1	54.5455		1	54.5455		1	54.5455		1	54.5455		1	54.5455		1	63.6364
BIOCARTA - Attenuation of GPCR Signaling	2	84.6154		2	76.9231		2	76.9231		2	76.9231		2	76.9231		2	76.9231		2	76.9231		2	76.9231		2	76.9231		2	76.9231		2	76.9231		2	76.9231
BIOCARTA - B Cell Receptor Complex	0	0		0	0		0	0		0	0		0	0		0	0		0	0		0	0		0	0		0	0		0	0		0	0
BIOCARTA - B Lymphocyte Cell Surface Molecules	1	11.1111		0	0		0	0		2	9.09091		2	9.09091		0	0		0	0		0	0		0	0		0	0		0	0		1	11.1111
BIOCARTA - BCR Signaling Pathway	2	59.4595		2	54.0541		2	54.0541		2	51.3514		2	45.9459		2	51.3514		2	54.0541		2	54.0541		2	54.0541		2	54.0541		2	54.0541		2	54.0541
BIOCARTA - Basic Mechanisms of SUMOylation	2	100		2	100		2	100		2	100		2	100		2	50		2	50		2	50		2	100		2	100		2	100		2	50
BIOCARTA - Basic mechanism of action of PPARa, PPARb(d) and PPARg and effects on gene expression	0	0		0	0		0	0		0	0		0	0		0	0		0	0		0	0		0	0		0	0		0	0		0	0
BIOCARTA - Bioactive Peptide Induced Signaling Pathway	2	63.4146		2	56.0976		2	56.0976		2	53.6585		2	51.2195		2	53.6585		2	56.0976		2	56.0976		2	56.0976		2	56.0976		2	56.0976		2	56.0976
BIOCARTA - Blockade of Neurotransmitter Relase by Botulinum Toxin	1	40		1	20		1	20		1	20		1	20		0	0		1	20		1	20		1	20		1	20		1	20		1	20
BIOCARTA - Bone Remodelling	1	21.4286		1	21.4286		1	21.4286		1	21.4286		1	21.4286		1	14.2857		1	14.2857		1	14.2857		1	21.4286		1	14.2857		1	14.2857		1	21.4286
BIOCARTA - Bystander B Cell Activation	0	0		0	0		0	0		0	0		0	0		0	0		0	0		0	0		0	0		0	0		0	0		0	0
BIOCARTA - CARM1 and Regulation of the Estrogen Receptor	1	66.6667		1	56.6667		1	53.3333		1	56.6667		1	53.3333		1	50		1	53.3333		1	53.3333		1	56.6667		1	50		1	50		1	53.3333
BIOCARTA - CBL mediated ligand-induced downregulation of EGF receptors	2	38.4615		2	61.5385		2	61.5385		2	15.3846		2	15.3846		2	53.8462		2	30.7692		2	46.1538		2	46.1538		2	38.4615		2	46.1538		2	61.5385
BIOCARTA - CCR3 signaling in Eosinophils	2	82.6087		2	73.913		2	73.913		2	65.2174		2	65.2174		2	69.5652		2	73.913		2	73.913		2	73.913		2	73.913		2	73.913		2	73.913
BIOCARTA - CD40L Signaling Pathway	2	60		2	40		2	40		2	33.3333		2	33.3333		2	26.6667		2	33.3333		2	33.3333		2	46.6667		2	40		2	40		2	53.3333
BIOCARTA - CTL mediated immune response against target cells	0	0		0	0		0	0		2	6.66667		2	6.66667		0	0		0	0		0	0		0	0		0	0		0	0		1	6.66667
BIOCARTA - CXCR4 Signaling Pathway	2	70.8333		2	58.3333		2	58.3333		2	50		2	50		2	50		2	54.1667		2	54.1667		2	58.3333		2	54.1667		2	54.1667		2	58.3333
BIOCARTA - Ca++/ Calmodulin-dependent Protein Kinase Activation	2	75		2	75		2	75		2	75		2	75		2	75		2	75		2	75		2	75		2	75		2	75		2	75
BIOCARTA - Cadmium induces DNA synthesis and proliferation in macrophages	2	62.5		2	62.5		2	62.5		2	62.5		2	62.5		2	43.75		2	56.25		2	56.25		2	62.5		2	56.25		2	56.25		2	62.5
BIOCARTA - Calcium Signaling by HBx of Hepatitis B virus	2	50		2	37.5		2	37.5		2	12.5		2	12.5		2	37.5		2	37.5		2	37.5		2	37.5		2	37.5		2	37.5		2	37.5
BIOCARTA - Cardiac Protection Against ROS	1	33.3333		1	11.1111		1	11.1111		1	11.1111		1	11.1111		1	11.1111		1	11.1111		1	11.1111		1	11.1111		1	11.1111		1	11.1111		1	11.1111
BIOCARTA - Caspase Cascade in Apoptosis	2	21.7391		1	4.54545		1	4.54545		2	21.7391		2	17.3913		2	8.69565		2	8.69565		2	17.3913		2	21.7391		2	8.69565		2	17.3913		2	21.7391
BIOCARTA - Catabolic Pathways for Arginine , Histidine, Glutamate, Glutamine, and Proline	2	83.3333		0	0		0	0		0	0		0	0		2	33.3333		2	50		2	50		2	50		2	50		2	50		2	50
BIOCARTA - Catabolic Pathways for Methionine, Isoleucine, Threonine and Valine	2	80		0	0		0	0		1	20		1	20		1	20		1	20		1	20		1	20		1	20		1	20		2	80
BIOCARTA - Cell Cycle: G1/S Check Point	2	46.4286		2	53.5714		2	53.5714		2	32.1429		2	32.1429		2	32.1429		2	32.1429		2	28.5714		2	32.1429		2	32.1429		2	32.1429		2	35.7143
BIOCARTA - Cell Cycle: G2/M Checkpoint	2	70.8333		2	58.3333		2	58.3333		2	58.3333		2	50		2	50		2	50		2	41.6667		2	50		2	50		2	50		2	58.3333
BIOCARTA - Cell to Cell Adhesion Signaling	2	61.5385		2	46.1538		2	46.1538		2	30.7692		2	23.0769		2	46.1538		2	46.1538		2	46.1538		2	46.1538		2	46.1538		2	46.1538		2	46.1538
BIOCARTA - Cells and Molecules involved in local acute inflammatory response	0	0		1	5.88235		1	11.7647		1	5.88235		1	5.88235		0	0		0	0		1	5.88235		0	0		0	0		0	0		1	11.7647
BIOCARTA - Ceramide Signaling Pathway	2	54.5455		2	45.4545		2	45.4545		2	54.5455		2	50		2	45.4545		2	50		2	50		2	50		2	50		2	50		2	59.0909
BIOCARTA - ChREBP regulation by carbohydrates and cAMP	2	80		2	70		2	70		2	65		2	65		2	60		2	65		2	60		2	60		2	60		2	60		2	70
BIOCARTA - Chaperones modulate interferon Signaling Pathway	1	36.8421		1	36.8421		1	36.8421		1	31.5789		1	36.8421		1	26.3158		1	31.5789		1	31.5789		1	36.8421		1	26.3158		1	26.3158		1	36.8421
BIOCARTA - Circadian Rhythms	2	50		2	16.6667		2	16.6667		2	16.6667		2	16.6667		2	16.6667		2	16.6667		2	16.6667		2	16.6667		2	16.6667		2	16.6667		2	16.6667
BIOCARTA - Classical Complement Pathway	0	0		2	7.14286		2	7.14286		0	0		0	0		0	0		0	0		0	0		0	0		0	0		0	0		2	7.14286
BIOCARTA - Complement Pathway	1	6.25		2	10.5263		2	10.5263		1	6.25		1	6.25		1	6.25		1	6.25		1	6.25		1	6.25		1	6.25		1	6.25		2	10.5263
BIOCARTA - Control of skeletal myogenesis by HDAC & calcium/calmodulin-dependent kinase (CaMK)	2	59.375		2	53.125		2	53.125		2	46.875		2	46.875		2	53.125		2	53.125		2	53.125		2	53.125		2	53.125		2	53.125		2	53.125
BIOCARTA - Corticosteroids and cardioprotection	2	47.619		2	42.8571		2	42.8571		2	42.8571		2	38.0952		2	33.3333		2	38.0952		2	38.0952		2	47.619		2	38.0952		2	38.0952		2	42.8571
BIOCARTA - Cyclin E Destruction Pathway	2	66.6667		2	77.7778		2	77.7778		2	44.4444		2	44.4444		2	55.5556		2	55.5556		2	55.5556		2	55.5556		2	55.5556		2	55.5556		2	55.5556
BIOCARTA - Cycling of Ran in nucleocytoplasmic transport	2	100		2	80		2	80		2	80		2	80		2	80		2	80		2	80		2	80		2	80		2	80		2	80
BIOCARTA - Cyclins and Cell Cycle Regulation	2	58.3333		2	58.3333		2	62.5		2	33.3333		2	33.3333		2	29.1667		2	29.1667		2	29.1667		2	33.3333		2	29.1667		2	29.1667		2	25
BIOCARTA - Cystic fibrosis transmembrane conductance regulator and beta 2 adrenergic receptor pathway	2	66.6667		2	66.6667		2	66.6667		2	75		2	75		2	66.6667		2	75		2	75		2	75		2	66.6667		2	66.6667		2	66.6667
BIOCARTA - Cytokine Network	0	0		0	0		0	0		0	0		0	0		0	0		0	0		0	0		1	4.7619		0	0		1	4.7619		0	0
BIOCARTA - Cytokines and Inflammatory Response	0	0		0	0		0	0		0	0		0	0		0	0		0	0		0	0		0	0		0	0		0	0		0	0
BIOCARTA - D4-GDI Signaling Pathway	2	30.7692		1	8.33333		1	8.33333		2	15.3846		2	15.3846		2	15.3846		2	15.3846		2	15.3846		2	15.3846		2	15.3846		2	15.3846		2	23.0769
BIOCARTA - Degradation of the RAR and RXR by the proteasome	2	33.3333		2	33.3333		2	33.3333		2	33.3333		2	33.3333		2	33.3333		2	33.3333		2	33.3333		2	33.3333		2	33.3333		2	33.3333		2	33.3333
BIOCARTA - Dendritic cells in regulating TH1 and TH2 Development	1	18.1818		1	4.54545		1	4.54545		1	4.54545		1	9.09091		1	4.54545		1	4.54545		1	4.54545		1	4.54545		1	4.54545		1	4.54545		1	4.54545
BIOCARTA - Deregulation of CDK5 in Alzheimers Disease	2	63.6364		2	45.4545		2	45.4545		2	45.4545		2	45.4545		2	54.5455		2	54.5455		2	54.5455		2	54.5455		2	54.5455		2	54.5455		2	54.5455
BIOCARTA - Double Stranded RNA Induced Gene Expression	2	80		2	70		2	70		2	70		2	70		2	40		2	60		2	60		2	70		2	60		2	70		2	80
BIOCARTA - Downregulated of MTA-3 in ER-negative Breast Tumors	2	50		2	57.1429		2	57.1429		2	64.2857		2	64.2857		2	57.1429		2	57.1429		2	57.1429		2	57.1429		2	50		2	57.1429		2	57.1429
BIOCARTA - E2F1 Destruction Pathway	2	60		2	70		2	70		2	30		2	30		2	40		2	40		2	40		2	40		2	40		2	40		2	40
BIOCARTA - EGF Signaling Pathway	2	62.963		2	55.5556		2	55.5556		2	48.1481		2	40.7407		2	48.1481		2	48.1481		2	51.8519		2	51.8519		2	51.8519		2	51.8519		2	55.5556
BIOCARTA - EPO Signaling Pathway	2	57.8947		2	42.1053		2	42.1053		2	42.1053		2	42.1053		2	36.8421		2	42.1053		2	42.1053		2	42.1053		2	42.1053		2	42.1053		2	42.1053
BIOCARTA - Effects of calcineurin in Keratinocyte Differentiation	2	57.1429		2	52.381		2	52.381		2	42.8571		2	47.619		2	42.8571		2	42.8571		2	42.8571		2	42.8571		2	42.8571		2	42.8571		2	57.1429
BIOCARTA - Electron Transport Reaction in Mitochondria	1	81.8182		1	27.2727		1	27.2727		1	63.6364		1	72.7273		1	72.7273		1	63.6364		1	72.7273		1	63.6364		1	63.6364		1	63.6364		1	63.6364
BIOCARTA - Endocytotic role of NDK, Phosphins and Dynamin	2	85.7143		2	71.4286		2	66.6667		2	71.4286		2	61.9048		2	71.4286		2	71.4286		2	71.4286		2	66.6667		2	71.4286		2	71.4286		2	66.6667
BIOCARTA - Eph Kinases and ephrins support platelet aggregation	2	50		2	60		2	60		2	50		2	20		2	60		2	60		2	60		2	60		2	60		2	60		2	80
BIOCARTA - Erk and PI-3 Kinase Are Necessary for Collagen Binding in Corneal Epithelia	2	73.913		2	60.8696		2	60.8696		2	52.1739		2	47.8261		2	60.8696		2	60.8696		2	60.8696		2	60.8696		2	60.8696		2	60.8696		2	65.2174
BIOCARTA - Erk1/Erk2 Mapk Signaling pathway	2	56.6667		2	53.3333		2	53.3333		2	40		2	43.3333		2	53.3333		2	46.6667		2	50		2	50		2	50		2	50		2	56.6667
BIOCARTA - Erythrocyte Differentiation Pathway	1	6.66667		0	0		0	0		0	0		0	0		2	6.66667		0	0		0	0		0	0		0	0		0	0		1	6.66667
BIOCARTA - Erythropoietin mediated neuroprotection through NF-kB	2	36.3636		2	36.3636		2	36.3636		2	36.3636		2	36.3636		2	18.1818		2	27.2727		2	27.2727		2	36.3636		2	27.2727		2	27.2727		2	36.3636
BIOCARTA - Extrinsic Prothrombin Activation Pathway	0	0		2	7.69231		2	7.69231		0	0		0	0		0	0		0	0		0	0		1	7.69231		0	0		0	0		2	15.3846
BIOCARTA - FAS signaling pathway ( CD95 )	2	50		2	30		2	30		2	33.3333		2	30		2	26.6667		2	30		2	33.3333		2	36.6667		2	33.3333		2	33.3333		2	43.3333
BIOCARTA - FOSB gene expression and drug abuse	2	20		2	20		2	20		2	20		2	20		2	20		2	20		2	20		2	20		2	20		2	20		2	20
BIOCARTA - FXR and LXR Regulation of Cholesterol Metabolism	1	14.2857		2	28.5714		2	28.5714		1	14.2857		1	14.2857		1	14.2857		1	14.2857		1	14.2857		1	14.2857		1	14.2857		1	14.2857		2	28.5714
BIOCARTA - Fc Epsilon Receptor I Signaling in Mast Cells	2	60		2	55		2	55		2	52.5		2	45		2	52.5		2	55		2	55		2	55		2	55		2	55		2	55
BIOCARTA - Fibrinolysis Pathway	1	8.33333		0	0		0	0		0	0		0	0		0	0		0	0		0	0		1	8.33333		0	0		0	0		2	25
BIOCARTA - Free Radical Induced Apoptosis	2	50		2	30		2	30		2	30		2	30		2	30		2	30		2	20		2	30		2	30		2	30		2	20
BIOCARTA - Function of SLRP in Bone: An Integrated View	0	0		0	0		0	0		0	0		0	0		0	0		0	0		0	0		0	0		0	0		0	0		0	0
BIOCARTA - G-Protein Signaling Through Tubby Proteins	2	42.8571		2	28.5714		2	28.5714		2	28.5714		2	28.5714		2	14.2857		2	28.5714		2	28.5714		2	28.5714		2	28.5714		2	28.5714		2	28.5714
BIOCARTA - GATA3 participate in activating the Th2 cytokine genes expression	2	56.25		2	50		2	50		2	50		2	43.75		2	50		2	50		2	50		2	50		2	50		2	50		2	50
BIOCARTA - Gamma-aminobutyric Acid Receptor Life Cycle	2	41.6667		2	33.3333		2	33.3333		2	33.3333		2	33.3333		2	41.6667		2	41.6667		2	41.6667		2	41.6667		2	41.6667		2	41.6667		2	50
BIOCARTA - Generation of amyloid b-peptide by PS1	1	25		1	25		1	25		1	25		1	25		1	25		1	25		1	25		1	25		1	25		1	25		2	50
BIOCARTA - Glycolysis Pathway	1	90		1	90		1	90		1	90		1	90		1	90		1	90		1	80		1	90		1	80		1	90		1	90
BIOCARTA - Granzyme A mediated Apoptosis Pathway	2	36.3636		2	54.5455		2	54.5455		2	45.4545		2	54.5455		2	45.4545		2	45.4545		2	54.5455		2	54.5455		2	54.5455		2	54.5455		2	45.4545
BIOCARTA - Growth Hormone Signaling Pathway	2	59.2593		2	44.4444		2	44.4444		2	44.4444		2	44.4444		2	44.4444		2	48.1481		2	48.1481		2	48.1481		2	48.1481		2	48.1481		2	48.1481
BIOCARTA - HIV Induced T Cell Apoptosis	0	0		0	0		0	0		0	0		0	0		0	0		0	0		0	0		0	0		0	0		0	0		0	0
BIOCARTA - HIV-1 defeats host-mediated resistance by CEM15	1	33.3333		1	33.3333		1	33.3333		0	0		0	0		1	33.3333		1	33.3333		1	33.3333		1	33.3333		1	33.3333		1	33.3333		1	33.3333
BIOCARTA - HIV-I Nef: negative effector of Fas and TNF	2	41.3793		2	29.3103		2	29.3103		2	32.7586		2	32.7586		2	24.1379		2	29.3103		2	31.0345		2	34.4828		2	29.3103		2	32.7586		2	41.3793
BIOCARTA - Hemoglobin's Chaperone	1	69.2308		0	0		0	0		0	0		0	0		1	38.4615		1	53.8462		1	53.8462		1	53.8462		1	53.8462		1	53.8462		1	46.1538
BIOCARTA - Hop Pathway in Cardiac Development	2	50		0	0		0	0		0	0		0	0		0	0		0	0		0	0		0	0		0	0		0	0		0	0
BIOCARTA - How Progesterone Initiates the Oocyte Maturation	2	86.9565		2	73.913		2	73.913		2	65.2174		2	69.5652		2	69.5652		2	69.5652		2	65.2174		2	69.5652		2	69.5652		2	69.5652		2	78.2609
BIOCARTA - How does salmonella hijack a cell	1	91.6667		1	58.3333		1	58.3333		1	41.6667		1	41.6667		1	41.6667		1	41.6667		1	41.6667		1	41.6667		1	41.6667		1	41.6667		1	41.6667
BIOCARTA - Human Cytomegalovirus and Map Kinase Pathways	2	75		2	75		2	75		2	68.75		2	56.25		2	62.5		2	62.5		2	62.5		2	68.75		2	62.5		2	62.5		2	75
BIOCARTA - Hypoxia and p53 in the Cardiovascular system	1	52.1739		1	47.8261		1	47.8261		1	47.8261		1	47.8261		1	47.8261		1	47.8261		1	43.4783		1	47.8261		1	47.8261		1	47.8261		1	56.5217
BIOCARTA - Hypoxia-Inducible Factor in the Cardiovascular System	1	40		1	40		1	40		1	40		1	33.3333		1	26.6667		1	40		1	40		1	40		1	40		1	40		1	40
BIOCARTA - IFN alpha signaling pathway	2	22.2222		2	22.2222		2	22.2222		2	11.1111		0	0		2	22.2222		2	22.2222		2	22.2222		2	22.2222		2	22.2222		2	33.3333		2	22.2222
BIOCARTA - IFN gamma signaling pathway	2	33.3333		2	33.3333		2	33.3333		2	33.3333		2	16.6667		2	33.3333		2	33.3333		2	33.3333		2	33.3333		2	33.3333		2	33.3333		2	33.3333
BIOCARTA - IGF-1 Signaling Pathway	2	60		2	40		2	40		2	35		2	40		2	40		2	40		2	40		2	40		2	40		2	40		2	40
BIOCARTA - IL 17 Signaling Pathway	0	0		0	0		0	0		0	0		0	0		0	0		0	0		0	0		0	0		0	0		0	0		0	0
BIOCARTA - IL 18 Signaling Pathway	0	0		0	0		0	0		0	0		0	0		0	0		0	0		0	0		0	0		0	0		0	0		0	0
BIOCARTA - IL 2 signaling pathway	2	54.5455		2	45.4545		2	40.9091		2	31.8182		2	27.2727		2	45.4545		2	45.4545		2	45.4545		2	40.9091		2	45.4545		2	45.4545		2	45.4545
BIOCARTA - IL 3 signaling pathway	2	53.3333		2	33.3333		2	33.3333		2	33.3333		2	33.3333		2	33.3333		2	33.3333		2	33.3333		2	33.3333		2	33.3333		2	33.3333		2	33.3333
BIOCARTA - IL 4 signaling pathway	2	45.4545		2	36.3636		2	27.2727		2	27.2727		2	18.1818		2	36.3636		2	36.3636		2	36.3636		2	27.2727		2	36.3636		2	27.2727		2	36.3636
BIOCARTA - IL 5 Signaling Pathway	0	0		0	0		0	0		0	0		0	0		0	0		0	0		0	0		0	0		0	0		0	0		0	0
BIOCARTA - IL 6 signaling pathway	2	57.1429		2	38.0952		2	33.3333		2	33.3333		2	28.5714		2	38.0952		2	38.0952		2	42.8571		2	33.3333		2	38.0952		2	38.0952		2	38.0952
BIOCARTA - IL-10 Anti-inflammatory Signaling Pathway	2	15.3846		2	7.69231		2	7.69231		2	7.69231		0	0		2	7.69231		2	7.69231		2	7.69231		2	7.69231		2	7.69231		2	7.69231		2	7.69231
BIOCARTA - IL-2 Receptor Beta Chain in T cell Activation	2	40.5405		2	32.4324		2	29.7297		2	24.3243		2	21.6216		2	29.7297		2	29.7297		2	29.7297		2	27.027		2	29.7297		2	27.027		2	32.4324
BIOCARTA - IL-7 Signal Transduction	2	43.75		2	50		2	43.75		2	31.25		2	18.75		2	50		2	50		2	50		2	43.75		2	50		2	50		2	50
BIOCARTA - IL12 and Stat4 Dependent Signaling Pathway in Th1 Development	2	21.7391		2	21.7391		2	21.7391		2	17.3913		2	13.0435		2	21.7391		2	21.7391		2	21.7391		2	21.7391		2	21.7391		2	21.7391		2	21.7391
BIOCARTA - IL22 Soluble Receptor Signaling Pathway	2	30.7692		2	30.7692		2	23.0769		2	15.3846		2	7.69231		2	30.7692		2	30.7692		2	30.7692		2	23.0769		2	30.7692		2	30.7692		2	30.7692
BIOCARTA - Inactivation of Gsk3 by AKT causes accumulation of b-catenin in Alveolar Macrophages	2	40.7407		2	33.3333		2	33.3333		2	25.9259		2	25.9259		2	25.9259		2	22.2222		2	25.9259		2	29.6296		2	25.9259		2	25.9259		2	29.6296
BIOCARTA - Induction of apoptosis through DR3 and DR4/5 Death Receptors	2	24.2424		2	18.1818		2	18.1818		2	24.2424		2	24.2424		2	15.1515		2	18.1818		2	18.1818		2	21.2121		2	18.1818		2	21.2121		2	24.2424
BIOCARTA - Influence of Ras and Rho proteins on G1 to S Transition	2	69.5652		2	78.2609		2	78.2609		2	60.8696		2	60.8696		2	52.1739		2	56.5217		2	56.5217		2	60.8696		2	56.5217		2	56.5217		2	60.8696
BIOCARTA - Inhibition of Cellular Proliferation by Gleevec	2	59.0909		2	45.4545		2	45.4545		2	45.4545		2	40.9091		2	45.4545		2	45.4545		2	45.4545		2	45.4545		2	45.4545		2	45.4545		2	45.4545
BIOCARTA - Inhibition of Huntington's disease neurodegeneration by histone deacetylase inhibitors	2	50		2	50		2	50		2	50		2	50		2	50		2	50		2	50		2	50		2	50		2	50		2	50
BIOCARTA - Inhibition of Matrix Metalloproteinases	2	11.1111		2	11.1111		2	11.1111		2	11.1111		2	11.1111		2	11.1111		2	11.1111		2	11.1111		2	11.1111		2	11.1111		2	11.1111		2	22.2222
BIOCARTA - Insulin Signaling Pathway	2	61.9048		2	38.0952		2	38.0952		2	38.0952		2	38.0952		2	42.8571		2	42.8571		2	42.8571		2	42.8571		2	42.8571		2	42.8571		2	42.8571
BIOCARTA - Integrin Signaling Pathway	2	71.0526		2	52.6316		2	52.6316		2	44.7368		2	39.4737		2	52.6316		2	52.6316		2	52.6316		2	55.2632		2	52.6316		2	52.6316		2	57.8947
BIOCARTA - Intrinsic Prothrombin Activation Pathway	0	0		2	8.69565		2	4.34783		0	0		0	0		0	0		0	0		0	0		1	4.34783		2	8.69565		2	21.7391		2	47.8261
BIOCARTA - Ion Channel and Phorbal Esters Signaling Pathway	2	60		2	80		2	80		2	60		2	60		2	60		2	80		2	80		2	80		2	80		2	80		2	80
BIOCARTA - Keratinocyte Differentiation	2	63.0435		2	63.0435		2	63.0435		2	58.6957		2	52.1739		2	54.3478		2	56.5217		2	56.5217		2	58.6957		2	56.5217		2	58.6957		2	65.2174
BIOCARTA - Lck and Fyn tyrosine kinases in initiation of TCR Activation	2	23.0769		2	23.0769		2	23.0769		2	7.69231		0	0		2	23.0769		2	23.0769		2	23.0769		2	23.0769		2	23.0769		2	23.0769		2	23.0769
BIOCARTA - Lectin Induced Complement Pathway	0	0		2	8.33333		2	8.33333		0	0		0	0		0	0		0	0		0	0		0	0		0	0		0	0		2	8.33333
BIOCARTA - Leloir pathway of galactose metabolism	2	100		2	33.3333		2	33.3333		0	0		0	0		0	0		0	0		0	0		0	0		0	0		0	0		2	33.3333
BIOCARTA - Links between Pyk2 and Map Kinases	2	77.4194		2	67.7419		2	67.7419		2	61.2903		2	54.8387		2	64.5161		2	67.7419		2	67.7419		2	67.7419		2	67.7419		2	67.7419		2	67.7419
BIOCARTA - Low-density lipoprotein (LDL) pathway during atherogenesis	1	16.6667		1	16.6667		1	16.6667		0	0		0	0		1	16.6667		1	16.6667		1	16.6667		1	16.6667		1	16.6667		1	16.6667		1	33.3333
BIOCARTA - MAPKinase Signaling Pathway	2	78.1609		2	71.2644		2	71.2644		2	65.5172		2	59.7701		2	67.8161		2	68.9655		2	68.9655		2	70.1149		2	68.9655		2	70.1149		2	72.4138
BIOCARTA - METS affect on Macrophage Differentiation	2	38.8889		2	50		2	50		2	27.7778		2	27.7778		2	27.7778		2	22.2222		2	27.7778		2	33.3333		2	27.7778		2	27.7778		2	44.4444
BIOCARTA - Malate-aspartate shuttle	2	75		2	25		2	25		2	75		2	75		2	25		2	50		2	50		2	50		2	50		2	50		2	50
BIOCARTA - Map Kinase Inactivation of SMRT Corepressor	2	45.4545		2	63.6364		2	63.6364		2	36.3636		2	45.4545		2	45.4545		2	36.3636		2	45.4545		2	54.5455		2	54.5455		2	45.4545		2	63.6364
BIOCARTA - Mechanism of Acetaminophen Activity and Toxicity	2	50		0	0		0	0		0	0		0	0		0	0		0	0		0	0		0	0		0	0		0	0		1	16.6667
BIOCARTA - Mechanism of Gene Regulation by Peroxisome Proliferators via PPARa(alpha)	1	47.3684		1	43.8596		1	42.1053		1	36.8421		1	35.0877		1	33.3333		1	36.8421		1	33.3333		1	38.5965		1	35.0877		1	36.8421		1	47.3684
BIOCARTA - Mitochondrial Carnitine Palmitoyltransferase (CPT) System	2	100		2	50		2	50		2	50		2	50		2	50		2	50		2	50		2	50		2	50		2	50		2	50
BIOCARTA - Monocyte and its Surface Molecules	0	0		0	0		0	0		2	9.09091		2	9.09091		0	0		0	0		0	0		0	0		0	0		0	0		2	36.3636
BIOCARTA - Msp/Ron Receptor Signaling Pathway	0	0		2	16.6667		2	16.6667		0	0		0	0		1	16.6667		1	16.6667		1	16.6667		2	16.6667		2	16.6667		2	16.6667		2	33.3333
BIOCARTA - Multi-Drug Resistance Factors	2	83.3333		2	83.3333		2	83.3333		2	83.3333		2	83.3333		2	83.3333		2	83.3333		2	100		2	100		2	100		2	100		2	83.3333
BIOCARTA - Multi-step Regulation of Transcription by Pitx2	2	50		2	43.75		2	37.5		2	37.5		2	31.25		2	31.25		2	31.25		2	37.5		2	37.5		2	31.25		2	31.25		2	37.5
BIOCARTA - Multiple antiapoptotic pathways from IGF-1R signaling lead to BAD phosphorylation	2	66.6667		2	60		2	60		2	53.3333		2	60		2	60		2	60		2	60		2	60		2	60		2	60		2	60
BIOCARTA - NF-kB Signaling Pathway	2	43.4783		2	34.7826		2	34.7826		2	26.087		2	26.087		2	26.087		2	26.087		2	30.4348		2	39.1304		2	34.7826		2	34.7826		2	43.4783
BIOCARTA - NFAT and Hypertrophy of the heart (Transcription in the broken heart)	2	61.8182		2	56.3636		2	56.3636		2	56.3636		2	54.5455		2	56.3636		2	56.3636		2	56.3636		2	56.3636		2	56.3636		2	56.3636		2	58.1818
BIOCARTA - NFkB activation by Nontypeable Hemophilus influenzae	2	58.3333		2	50		2	50		2	41.6667		2	33.3333		2	45.8333		2	45.8333		2	45.8333		2	50		2	45.8333		2	50		2	58.3333
BIOCARTA - NO2-dependent IL 12 Pathway in NK cells	2	17.6471		2	17.6471		2	17.6471		2	11.7647		2	5.88235		2	11.7647		2	17.6471		2	17.6471		2	17.6471		2	17.6471		2	17.6471		2	17.6471
BIOCARTA - Nerve growth factor pathway (NGF)	2	52.6316		2	42.1053		2	42.1053		2	42.1053		2	42.1053		2	36.8421		2	42.1053		2	42.1053		2	42.1053		2	42.1053		2	42.1053		2	42.1053
BIOCARTA - Neuropeptides VIP and PACAP inhibit the apoptosis of activated T cells	2	68.9655		2	65.5172		2	65.5172		2	58.6207		2	58.6207		2	55.1724		2	62.069		2	62.069		2	65.5172		2	55.1724		2	58.6207		2	65.5172
BIOCARTA - Neuroregulin receptor degredation protein-1 Controls ErbB3 receptor recycling	2	20		2	80		2	80		2	20		2	20		2	40		2	20		2	40		2	40		2	40		2	40		2	80
BIOCARTA - Neutrophil and Its Surface Molecules	0	0		0	0		0	0		2	12.5		2	12.5		0	0		0	0		0	0		0	0		0	0		0	0		1	25
BIOCARTA - Nitric Oxide Signaling Pathway	2	66.6667		2	66.6667		2	62.5		2	62.5		2	62.5		2	62.5		2	66.6667		2	66.6667		2	66.6667		2	66.6667		2	66.6667		2	66.6667
BIOCARTA - Nuclear receptors coordinate the activities of chromatin remodeling complexes and coactivators to facilitate initiation of transcription in carcinoma cells	2	60		2	46.6667		2	46.6667		2	46.6667		2	46.6667		2	40		2	46.6667		2	46.6667		2	53.3333		2	46.6667		2	46.6667		2	46.6667
BIOCARTA - OX40 Signaling Pathway	0	0		0	0		0	0		0	0		0	0		0	0		0	0		0	0		0	0		0	0		0	0		0	0
BIOCARTA - Opposing roles of AIF in Apoptosis and Cell Survival	2	25		0	0		0	0		2	50		2	50		2	25		2	50		2	50		2	50		2	50		2	50		2	75
BIOCARTA - Overview of telomerase RNA component gene hTerc Transcriptional Regulation	2	83.3333		2	50		2	50		2	33.3333		2	50		2	50		2	33.3333		2	33.3333		2	33.3333		2	33.3333		2	33.3333		2	33.3333
BIOCARTA - Overview of telomerase protein component gene hTert Transcriptional Regulation	2	62.5		2	62.5		2	62.5		1	12.5		2	50		2	50		2	37.5		2	37.5		2	25		2	25		2	25		2	62.5
BIOCARTA - Oxidative Stress Induced Gene Expression Via Nrf2	2	35.7143		2	42.8571		2	42.8571		2	42.8571		2	42.8571		2	42.8571		2	42.8571		2	42.8571		2	42.8571		2	42.8571		2	42.8571		2	42.8571
BIOCARTA - PDGF Signaling Pathway	2	62.963		2	51.8519		2	51.8519		2	48.1481		2	40.7407		2	48.1481		2	48.1481		2	48.1481		2	48.1481		2	48.1481		2	48.1481		2	51.8519
BIOCARTA - PKC-catalyzed phosphorylation of inhibitory phosphoprotein of myosin phosphatase	1	86.6667		1	53.3333		1	53.3333		1	53.3333		1	53.3333		1	46.6667		1	53.3333		1	53.3333		1	53.3333		1	53.3333		1	53.3333		1	53.3333
BIOCARTA - PTEN dependent cell cycle arrest and apoptosis	2	72.2222		2	44.4444		2	44.4444		2	33.3333		2	33.3333		2	38.8889		2	38.8889		2	38.8889		2	38.8889		2	38.8889		2	38.8889		2	50
BIOCARTA - Pelp1 Modulation of Estrogen Receptor Activity	2	71.4286		2	71.4286		2	71.4286		2	71.4286		2	57.1429		2	71.4286		2	71.4286		2	71.4286		2	71.4286		2	71.4286		2	71.4286		2	71.4286
BIOCARTA - Pertussis toxin-insensitive CCR5 Signaling in Macrophage	2	45		2	45		2	45		2	40		2	40		2	40		2	45		2	45		2	45		2	45		2	45		2	45
BIOCARTA - Phosphoinositides and their downstream targets.	2	86.3636		2	72.7273		2	72.7273		2	68.1818		2	63.6364		2	68.1818		2	72.7273		2	72.7273		2	72.7273		2	72.7273		2	68.1818		2	72.7273
BIOCARTA - Phospholipase C Signaling Pathway	2	87.5		2	75		2	75		2	75		2	75		2	50		2	75		2	75		2	75		2	75		2	75		2	75
BIOCARTA - Phospholipase C d1 in phospholipid associated cell signaling	2	60		2	60		2	60		2	60		2	60		2	40		2	60		2	60		2	60		2	60		2	60		2	60
BIOCARTA - Phospholipase C-epsilon pathway	2	75		2	75		2	75		2	75		2	75		2	66.6667		2	75		2	75		2	75		2	75		2	75		2	75
BIOCARTA - Phospholipids as signalling intermediaries	2	61.5385		2	53.8462		2	53.8462		2	42.3077		2	42.3077		2	50		2	50		2	50		2	50		2	50		2	50		2	61.5385
BIOCARTA - Phosphorylation of MEK1 by cdk5/p35 down regulates the MAP kinase pathway	2	61.5385		2	61.5385		2	61.5385		2	53.8462		2	53.8462		2	61.5385		2	61.5385		2	61.5385		2	61.5385		2	53.8462		2	61.5385		2	61.5385
BIOCARTA - Presenilin action in Notch and Wnt signaling	2	28.5714		2	28.5714		2	28.5714		2	21.4286		2	28.5714		2	28.5714		2	21.4286		2	21.4286		2	21.4286		2	21.4286		2	21.4286		2	35.7143
BIOCARTA - Proepithelin Conversion to Epithelin and Wound Repair Control	0	0		0	0		0	0		0	0		0	0		0	0		0	0		0	0		0	0		0	0		0	0		1	12.5
BIOCARTA - Protein Kinase A at the Centrosome	2	86.6667		2	80		2	80		2	80		2	80		2	80		2	80		2	80		2	80		2	80		2	80		2	80
BIOCARTA - Proteolysis and Signaling Pathway of Notch	2	33.3333		2	50		2	33.3333		2	16.6667		2	33.3333		2	50		2	33.3333		2	33.3333		2	16.6667		2	16.6667		2	16.6667		2	66.6667
BIOCARTA - RB Tumor Suppressor/Checkpoint Signaling in response to DNA damage	2	76.9231		2	53.8462		2	53.8462		2	53.8462		2	46.1538		2	53.8462		2	53.8462		2	46.1538		2	53.8462		2	53.8462		2	53.8462		2	53.8462
BIOCARTA - Rab GTPases Mark Targets In The Endocytotic Machinery	2	100		2	100		2	100		2	100		2	100		2	100		2	100		2	100		2	100		2	100		2	100		2	100
BIOCARTA - Rac 1 cell motility signaling pathway	2	72.7273		2	50		2	50		2	40.9091		2	40.9091		2	50		2	45.4545		2	45.4545		2	50		2	45.4545		2	45.4545		2	50
BIOCARTA - Ras Signaling Pathway	2	72.7273		2	54.5455		2	54.5455		2	54.5455		2	54.5455		2	50		2	50		2	50		2	59.0909		2	50		2	50		2	54.5455
BIOCARTA - Ras-Independent pathway in NK cell-mediated cytotoxicity	2	40		2	35		2	35		2	25		2	25		2	35		2	35		2	35		2	35		2	35		2	35		2	40
BIOCARTA - Reelin Signaling Pathway	2	28.5714		2	57.1429		2	57.1429		2	28.5714		2	14.2857		2	28.5714		2	28.5714		2	28.5714		2	28.5714		2	28.5714		2	28.5714		2	57.1429
BIOCARTA - Regulation of BAD phosphorylation	2	40.9091		2	54.5455		2	54.5455		2	45.4545		2	50		2	54.5455		2	54.5455		2	54.5455		2	50		2	50		2	54.5455		2	54.5455
BIOCARTA - Regulation of PGC-1a	2	76.9231		2	57.6923		2	57.6923		2	61.5385		2	61.5385		2	61.5385		2	61.5385		2	61.5385		2	61.5385		2	61.5385		2	61.5385		2	61.5385
BIOCARTA - Regulation of Spermatogenesis by CREM	2	42.8571		2	28.5714		2	28.5714		2	28.5714		2	28.5714		2	28.5714		2	28.5714		2	28.5714		2	28.5714		2	28.5714		2	28.5714		2	28.5714
BIOCARTA - Regulation of cell cycle progression by Plk3	1	87.5		1	75		1	75		1	75		1	75		1	62.5		1	62.5		1	50		1	62.5		1	62.5		1	62.5		1	75
BIOCARTA - Regulation of ck1/cdk5 by type 1 glutamate receptors	2	70.5882		2	70.5882		2	70.5882		2	70.5882		2	70.5882		2	64.7059		2	70.5882		2	70.5882		2	70.5882		2	70.5882		2	70.5882		2	70.5882
BIOCARTA - Regulation of eIF2	2	100		2	100		2	100		2	100		2	100		2	90.9091		2	90.9091		2	100		2	100		2	100		2	100		2	100
BIOCARTA - Regulation of eIF4e and p70 S6 Kinase	2	83.3333		2	79.1667		2	79.1667		2	66.6667		2	70.8333		2	66.6667		2	70.8333		2	70.8333		2	70.8333		2	70.8333		2	66.6667		2	79.1667
BIOCARTA - Regulation of hematopoiesis by cytokines	0	0		0	0		0	0		0	0		0	0		0	0		0	0		0	0		0	0		0	0		0	0		0	0
BIOCARTA - Regulation of p27 Phosphorylation during Cell Cycle Progression	2	61.5385		2	61.5385		2	61.5385		2	46.1538		2	38.4615		2	46.1538		2	46.1538		2	46.1538		2	46.1538		2	46.1538		2	38.4615		2	46.1538
BIOCARTA - Regulation of transcriptional activity by PML	2	29.4118		2	23.5294		2	23.5294		2	23.5294		2	23.5294		2	29.4118		2	29.4118		2	29.4118		2	29.4118		2	29.4118		2	23.5294		2	35.2941
BIOCARTA - Repression of Pain Sensation by the Transcriptional Regulator DREAM	2	64.2857		2	64.2857		2	64.2857		2	57.1429		2	57.1429		2	64.2857		2	64.2857		2	64.2857		2	64.2857		2	64.2857		2	64.2857		2	64.2857
BIOCARTA - Reversal of Insulin Resistance by Leptin	2	80		1	50		1	50		1	30		1	30		1	30		1	30		1	30		1	30		1	30		1	30		1	50
BIOCARTA - Rho cell motility signaling pathway	2	83.871		2	45.1613		2	45.1613		2	32.2581		2	32.2581		2	38.7097		2	38.7097		2	38.7097		2	38.7097		2	38.7097		2	38.7097		2	38.7097
BIOCARTA - Rho-Selective Guanine Exchange Factor AKAP13 Mediates Stress Fiber Formation	2	72.7273		2	45.4545		2	45.4545		2	45.4545		2	45.4545		2	45.4545		2	45.4545		2	45.4545		2	54.5455		2	45.4545		2	45.4545		2	45.4545
BIOCARTA - Role of BRCA1, BRCA2 and ATR in Cancer Susceptibility	2	38.0952		2	38.0952		2	38.0952		2	42.8571		2	42.8571		2	33.3333		2	33.3333		2	28.5714		2	33.3333		2	33.3333		2	33.3333		2	33.3333
BIOCARTA - Role of EGF Receptor Transactivation by GPCRs in Cardiac Hypertrophy	2	33.3333		2	44.4444		2	44.4444		2	33.3333		2	33.3333		2	27.7778		2	27.7778		2	33.3333		2	33.3333		2	33.3333		2	33.3333		2	44.4444
BIOCARTA - Role of Erk5 in Neuronal Survival	2	76.4706		2	52.9412		2	52.9412		2	47.0588		2	47.0588		2	41.1765		2	47.0588		2	52.9412		2	47.0588		2	47.0588		2	47.0588		2	52.9412
BIOCARTA - Role of MEF2D in T-cell Apoptosis	2	56.5217		2	47.8261		2	47.8261		2	47.8261		2	47.8261		2	47.8261		2	47.8261		2	47.8261		2	52.1739		2	47.8261		2	47.8261		2	47.8261
BIOCARTA - Role of Mitochondria in Apoptotic Signaling	2	14.2857		2	9.52381		2	9.52381		2	14.2857		2	14.2857		2	9.52381		2	14.2857		2	14.2857		2	14.2857		2	14.2857		2	14.2857		2	19.0476
BIOCARTA - Role of PI3K subunit p85 in regulation of Actin Organization and Cell Migration	2	86.6667		2	66.6667		2	66.6667		2	46.6667		2	46.6667		2	53.3333		2	46.6667		2	46.6667		2	46.6667		2	46.6667		2	46.6667		2	53.3333
BIOCARTA - Role of PPAR-gamma Coactivators in Obesity and Thermogenesis	2	22.2222		2	33.3333		2	22.2222		2	22.2222		2	22.2222		2	22.2222		2	22.2222		2	22.2222		2	22.2222		2	22.2222		2	22.2222		2	22.2222
BIOCARTA - Role of Parkin in the Ubiquitin-Proteasomal Pathway	2	53.8462		2	46.1538		2	46.1538		2	46.1538		2	46.1538		2	38.4615		2	38.4615		2	38.4615		2	53.8462		2	38.4615		2	46.1538		2	38.4615
BIOCARTA - Role of Tob in T-cell activation	0	0		0	0		0	0		0	0		0	0		2	4.7619		0	0		0	0		0	0		0	0		0	0		1	4.7619
BIOCARTA - Role of nicotinic acetylcholine receptors in the regulation of apoptosis	2	46.6667		2	46.6667		2	46.6667		2	26.6667		2	26.6667		2	46.6667		2	46.6667		2	46.6667		2	46.6667		2	40		2	46.6667		2	46.6667
BIOCARTA - SARS Coronavirus Protease	1	90		1	80		1	80		1	70		1	70		1	70		1	80		1	80		1	80		1	80		1	80		1	90
BIOCARTA - SODD/TNFR1 Signaling Pathway	2	10		2	10		2	10		2	10		2	10		2	10		2	10		2	10		2	10		2	10		2	10		2	10
BIOCARTA - SREBP control of lipid synthesis	2	37.5		2	25		2	12.5		0	0		0	0		2	12.5		0	0		2	12.5		0	0		0	0		0	0		2	25
BIOCARTA - Selective expression of chemokine receptors during T-cell polarization	1	3.44828		1	3.44828		1	3.44828		1	3.44828		0	0		1	3.44828		1	3.44828		1	3.44828		1	3.44828		1	3.44828		1	3.44828		1	3.44828
BIOCARTA - Shuttle for transfer of acetyl groups from mitochondria to the cytosol	2	100		2	50		2	50		2	62.5		2	62.5		2	50		2	62.5		2	62.5		2	62.5		2	62.5		2	62.5		2	75
BIOCARTA - Signal Dependent Regulation of Myogenesis by Corepressor MITR	2	88.8889		2	44.4444		2	44.4444		2	44.4444		2	44.4444		2	44.4444		2	44.4444		2	44.4444		2	44.4444		2	44.4444		2	44.4444		2	44.4444
BIOCARTA - Signal transduction through IL1R	2	32.3529		2	32.3529		2	32.3529		2	26.4706		2	20.5882		2	26.4706		2	26.4706		2	29.4118		2	35.2941		2	32.3529		2	35.2941		2	35.2941
BIOCARTA - Signaling Pathway from G-Protein Families	2	64.8649		2	59.4595		2	59.4595		2	59.4595		2	59.4595		2	56.7568		2	59.4595		2	59.4595		2	59.4595		2	59.4595		2	59.4595		2	59.4595
BIOCARTA - Signaling of Hepatocyte Growth Factor Receptor	2	63.8889		2	50		2	50		2	36.1111		2	36.1111		2	47.2222		2	47.2222		2	47.2222		2	47.2222		2	47.2222		2	47.2222		2	55.5556
BIOCARTA - Skeletal muscle hypertrophy is regulated via AKT/mTOR pathway	2	80		2	80		2	80		2	60		2	70		2	55		2	65		2	70		2	70		2	70		2	65		2	80
BIOCARTA - Small Leucine-rich Proteoglycan (SLRP) molecules	2	83.3333		0	0		0	0		0	0		2	83.3333		0	0		0	0		0	0		1	16.6667		1	16.6667		1	16.6667		0	0
BIOCARTA - Sonic Hedgehog (SHH) Receptor Ptc1 Regulates cell cycle	2	83.3333		2	58.3333		2	58.3333		2	41.6667		2	33.3333		2	41.6667		2	41.6667		2	33.3333		2	50		2	41.6667		2	41.6667		2	41.6667
BIOCARTA - Sonic Hedgehog (Shh) Pathway	2	81.25		2	81.25		2	81.25		2	56.25		2	68.75		2	62.5		2	75		2	75		2	81.25		2	68.75		2	75		2	81.25
BIOCARTA - Sprouty regulation of tyrosine kinase signals	2	55.5556		2	44.4444		2	44.4444		2	27.7778		2	27.7778		2	38.8889		2	33.3333		2	38.8889		2	38.8889		2	38.8889		2	38.8889		2	44.4444
BIOCARTA - Stat3 Signaling Pathway	2	87.5		2	87.5		2	75		2	62.5		2	50		2	75		2	75		2	75		2	62.5		2	75		2	75		2	87.5
BIOCARTA - Stress Induction of HSP Regulation	2	26.6667		2	20		2	20		2	26.6667		2	26.6667		2	26.6667		2	26.6667		2	26.6667		2	26.6667		2	26.6667		2	26.6667		2	33.3333
BIOCARTA - T Cell Receptor Signaling Pathway	2	56.25		2	47.9167		2	47.9167		2	43.75		2	39.5833		2	41.6667		2	45.8333		2	45.8333		2	47.9167		2	45.8333		2	45.8333		2	47.9167
BIOCARTA - T Cell Receptor and CD3 Complex	0	0		0	0		0	0		0	0		0	0		0	0		0	0		0	0		0	0		0	0		0	0		0	0
BIOCARTA - T Cytotoxic Cell Surface Molecules	1	7.14286		0	0		0	0		2	7.14286		2	7.14286		0	0		0	0		0	0		0	0		0	0		0	0		1	7.14286
BIOCARTA - T Helper Cell Surface Molecules	1	7.14286		0	0		0	0		2	7.14286		2	7.14286		0	0		0	0		0	0		0	0		0	0		0	0		1	7.14286
BIOCARTA - TACI and BCMA stimulation of B cell immune responses.	2	33.3333		2	26.6667		2	26.6667		2	26.6667		2	26.6667		2	20		2	20		2	20		2	26.6667		2	20		2	26.6667		2	33.3333
BIOCARTA - TGF beta signaling pathway	2	31.5789		2	26.3158		2	26.3158		2	21.0526		2	21.0526		2	31.5789		2	31.5789		2	31.5789		2	36.8421		2	31.5789		2	26.3158		2	31.5789
BIOCARTA - TNF/Stress Related Signaling	2	56		2	48		2	48		2	48		2	36		2	40		2	44		2	44		2	52		2	48		2	48		2	56
BIOCARTA - TNFR1 Signaling Pathway	2	44.8276		2	31.0345		2	31.0345		2	34.4828		2	31.0345		2	27.5862		2	31.0345		2	34.4828		2	37.931		2	31.0345		2	34.4828		2	44.8276
BIOCARTA - TNFR2 Signaling Pathway	2	55.5556		2	38.8889		2	38.8889		2	33.3333		2	33.3333		2	27.7778		2	33.3333		2	33.3333		2	44.4444		2	38.8889		2	38.8889		2	50
BIOCARTA - TPO Signaling Pathway	2	56.5217		2	43.4783		2	43.4783		2	43.4783		2	43.4783		2	39.1304		2	43.4783		2	43.4783		2	43.4783		2	43.4783		2	43.4783		2	43.4783
BIOCARTA - TSP-1 Induced Apoptosis in Microvascular Endothelial Cell	2	28.5714		2	42.8571		2	42.8571		2	28.5714		2	14.2857		2	42.8571		2	28.5714		2	42.8571		2	42.8571		2	28.5714		2	42.8571		2	42.8571
BIOCARTA - Telomeres, Telomerase, Cellular Aging, and Immortality	2	55.5556		2	55.5556		2	55.5556		2	50		2	55.5556		2	55.5556		2	50		2	55.5556		2	55.5556		2	55.5556		2	55.5556		2	61.1111
BIOCARTA - Th1/Th2 Differentiation	0	0		0	0		0	0		0	0		0	0		0	0		0	0		0	0		0	0		0	0		0	0		0	0
BIOCARTA - The 4-1BB-dependent immune response	2	50		2	50		2	50		2	50		2	50		2	38.8889		2	44.4444		2	44.4444		2	50		2	44.4444		2	44.4444		2	50
BIOCARTA - The Co-Stimulatory Signal During T-cell Activation	2	19.0476		2	14.2857		2	14.2857		2	9.52381		2	4.7619		2	14.2857		2	14.2857		2	14.2857		2	14.2857		2	14.2857		2	14.2857		2	14.2857
BIOCARTA - The IGF-1 Receptor and Longevity	2	57.1429		2	35.7143		2	35.7143		2	28.5714		2	35.7143		2	35.7143		2	35.7143		2	35.7143		2	35.7143		2	35.7143		2	35.7143		2	42.8571
BIOCARTA - The Role of Eosinophils in the Chemokine Network of Allergy	0	0		0	0		0	0		0	0		0	0		0	0		0	0		0	0		0	0		0	0		0	0		0	0
BIOCARTA - The role of FYVE-finger proteins in vesicle transport	2	57.1429		2	42.8571		2	42.8571		1	28.5714		1	28.5714		2	28.5714		2	42.8571		2	42.8571		2	42.8571		2	42.8571		2	28.5714		2	42.8571
BIOCARTA - Thrombin signaling and protease-activated receptors	2	66.6667		2	52.381		2	52.381		2	42.8571		2	42.8571		2	47.619		2	52.381		2	52.381		2	52.381		2	52.381		2	52.381		2	52.381
BIOCARTA - Toll-Like Receptor Pathway	2	48.6486		2	35.1351		2	35.1351		2	29.7297		2	27.027		2	29.7297		2	29.7297		2	32.4324		2	40.5405		2	40.5405		2	37.8378		2	40.5405
BIOCARTA - Transcription Regulation by Methyltransferase of CARM1	2	69.2308		2	69.2308		2	69.2308		2	69.2308		2	69.2308		2	69.2308		2	69.2308		2	69.2308		2	69.2308		2	69.2308		2	69.2308		2	69.2308
BIOCARTA - Transcription factor CREB and its extracellular signals	2	88.8889		2	81.4815		2	81.4815		2	81.4815		2	81.4815		2	81.4815		2	81.4815		2	81.4815		2	81.4815		2	81.4815		2	81.4815		2	81.4815
BIOCARTA - Transcriptional activation of dbpb from mRNA	0	0		2	25		2	25		2	25		2	25		0	0		0	0		0	0		0	0		0	0		0	0		2	25
BIOCARTA - Trka Receptor Signaling Pathway	2	57.1429		2	50		2	50		2	42.8571		2	42.8571		2	35.7143		2	42.8571		2	50		2	42.8571		2	42.8571		2	42.8571		2	50
BIOCARTA - Tumor Suppressor Arf Inhibits Ribosomal Biogenesis	2	37.5		2	43.75		2	43.75		2	37.5		2	37.5		2	43.75		2	43.75		2	43.75		2	43.75		2	43.75		2	37.5		2	43.75
BIOCARTA - VEGF, Hypoxia, and Angiogenesis	1	60.7143		1	67.8571		1	67.8571		1	42.8571		1	42.8571		1	57.1429		1	57.1429		1	53.5714		1	67.8571		1	57.1429		1	57.1429		1	64.2857
BIOCARTA - Visceral Fat Deposits and the Metabolic Syndrome	2	12.5		0	0		0	0		0	0		1	12.5		0	0		0	0		0	0		0	0		2	12.5		0	0		0	0
BIOCARTA - Vitamin C in the Brain	2	27.2727		2	9.09091		2	9.09091		2	27.2727		2	27.2727		2	27.2727		2	27.2727		2	27.2727		2	27.2727		2	45.4545		2	72.7273		2	81.8182
BIOCARTA - WNT Signaling Pathway	2	53.8462		2	50		2	46.1538		2	38.4615		2	38.4615		2	42.3077		2	42.3077		2	42.3077		2	42.3077		2	42.3077		2	42.3077		2	50
BIOCARTA - Y branching of actin filaments	2	57.8947		2	42.1053		2	42.1053		2	26.3158		2	26.3158		2	26.3158		2	26.3158		2	26.3158		2	26.3158		2	26.3158		2	26.3158		2	31.5789
BIOCARTA - cdc25 and chk1 Regulatory Pathway in response to DNA damage	2	88.8889		2	55.5556		2	55.5556		2	55.5556		2	44.4444		2	55.5556		2	55.5556		2	44.4444		2	55.5556		2	55.5556		2	55.5556		2	55.5556
BIOCARTA - fMLP induced chemokine gene expression in HMC-1 cells	2	69.2308		2	64.1026		2	64.1026		2	64.1026		2	58.9744		2	56.4103		2	61.5385		2	61.5385		2	64.1026		2	61.5385		2	61.5385		2	64.1026
BIOCARTA - g-Secretase mediated ErbB4 Signaling Pathway	2	25		2	37.5		2	37.5		2	25		2	25		2	37.5		2	25		2	37.5		2	37.5		2	37.5		2	37.5		2	50
BIOCARTA - mCalpain and friends in Cell motility	2	68		2	56		2	56		2	48		2	48		2	56		2	60		2	64		2	60		2	60		2	60		2	68
BIOCARTA - mTOR Signaling Pathway	2	82.6087		2	73.913		2	73.913		2	60.8696		2	60.8696		2	60.8696		2	65.2174		2	65.2174		2	65.2174		2	69.5652		2	60.8696		2	73.913
BIOCARTA - p38 MAPK Signaling Pathway	2	52.5		2	37.5		2	37.5		2	32.5		2	27.5		2	37.5		2	37.5		2	37.5		2	37.5		2	37.5		2	37.5		2	37.5
BIOCARTA - p53 Signaling Pathway	2	43.75		2	50		2	50		2	31.25		2	31.25		2	31.25		2	31.25		2	25		2	31.25		2	31.25		2	31.25		2	31.25
BIOCARTA - uCalpain and friends in Cell spread	2	72.2222		2	50		2	50		2	44.4444		2	44.4444		2	55.5556		2	61.1111		2	61.1111		2	61.1111		2	55.5556		2	55.5556		2	72.2222
KEGG - 1,2-Dichloroethane degradation	21	81.8182	50	1	16.6667	50	1	16.6667	50	0	0	50	1	16.6667	50	1	16.6667	50	1	16.6667	50	4	20	50	1	16.6667	50	0	0	50	0	0	50	13	45.4545	50
KEGG - 2,4-Dichlorobenzoate degradation	8	42.8571	14.2857	10	11.7647	14.2857	6	15.3846	14.2857	5	28.5714	14.2857	5	28.5714	14.2857	5	28.5714	14.2857	5	28.5714	14.2857	5	28.5714	14.2857	5	28.5714	14.2857	5	28.5714	14.2857	5	28.5714	14.2857	8	23.5294	14.2857
KEGG - ABC transporters, prokaryotic	34	27.6042		34	24.4792		34	25		33	21.3542		33	21.875		33	18.75		33	20.8333		33	21.3542		33	20.8333		34	23.9583		33	23.4375		33	26.0417
KEGG - ATP synthesis	247	71.4286		248	60.3175		247	60.3175		248	66.6667		248	66.6667		248	65.0794		248	65.0794		248	63.4921		247	61.9048		248	65.0794		248	65.0794		248	65.0794
KEGG - Adherens junction	3	57.1429		3	45.4545		3	45.4545		3	29.8701		3	32.4675		3	44.1558		3	41.5584		3	42.8571		3	46.7532		3	42.8571		3	41.5584		3	46.7532
KEGG - Alkaloid biosynthesis	158	29.8246	20.8333	39	24.5614	8.33333	38	25.4545	8.33333	102	10.5263	8.33333	100	10.5263	8.33333	87	10.5263	8.33333	111	12.2807	8.33333	116	14.0351	8.33333	116	14.0351	8.33333	113	12.2807	8.33333	118	10.5263	8.33333	147	36.8421	8.33333
KEGG - Alzheimer's disease	3	26.087		3	26.087		3	26.087		3	21.7391		3	26.087		3	30.4348		3	21.7391		3	26.087		3	26.087		3	26.087		3	21.7391		3	39.1304
KEGG - Amyotrophic lateral sclerosis (ALS)	3	58.8235		3	35.2941		3	35.2941		3	29.4118		3	35.2941		3	35.2941		3	35.2941		3	35.2941		3	41.1765		3	41.1765		3	35.2941		3	41.1765
KEGG - Apoptosis	3	38.7755		3	33.6735		3	32.6531		3	32.6531		3	32.6531		3	33.6735		3	34.6939		3	35.7143		3	35.7143		3	37.7551		3	37.7551		3	44.898
KEGG - Atrazine degradation	12	33.3333	22.2222	1	33.3333	22.2222	2	33.3333	22.2222	4	33.3333	22.2222	4	33.3333	22.2222	3	33.3333	22.2222	2	50	22.2222	3	33.3333	22.2222	2	66.6667	22.2222	3	33.3333	22.2222	3	33.3333	22.2222	2	33.3333	22.2222
KEGG - Bacterial chemotaxis	70	5.08475		3	3.0303		11	3.0303		2	2.77778		2	3.0303		2	3.0303		9	9.09091		16	5.55556		2	3.0303		7	3.38983		6	5.55556		5	2.43902
KEGG - Basal transcription factors	39	86.1111		40	44.4444		39	41.6667		40	41.6667		40	38.8889		40	30.5556		40	38.8889		40	38.8889		39	36.1111		40	38.8889		40	38.8889		40	38.8889
KEGG - Biosynthesis of 12-, 14- and 16-membered macrolides	1	25		1	50		1	50		0	0		0	0		0	0		1	50		1	62.5		1	50		1	50		1	50		1	50
KEGG - Biosynthesis of ansamycins	10	50	50	0	0	50	0	0	50	6	16.6667	50	8	16.6667	50	10	66.6667	50	10	50	50	10	50	50	10	66.6667	50	10	66.6667	50	10	50	50	10	66.6667	50
KEGG - Biosynthesis of siderophore group nonribosomal peptides	43	30	50	20	11.1111	50	21	11.1111	50	0	0	50	0	0	50	9	16.6667	50	26	20	50	13	16.6667	50	24	22.2222	50	13	16.6667	50	7	16.6667	50	15	22.2222	50
KEGG - Biosynthesis of type II polyketide backbone	1	16.6667	25	1	16.6667	25	1	33.3333	25	0	0	25	0	0	25	2	33.3333	25	2	16.6667	25	2	16.6667	25	2	16.6667	25	2	16.6667	25	2	16.6667	25	2	33.3333	25
KEGG - Biosynthesis of type II polyketide products	2	9.09091		0	0		0	0		0	0		0	0		0	0		0	0		0	0		0	0		0	0		0	0		0	0
KEGG - Biotin metabolism	179	70.5882	50	94	17.6471	50	99	17.6471	50	59	11.7647	50	59	17.6471	50	148	17.6471	50	155	23.5294	50	152	23.5294	50	164	23.5294	50	165	23.5294	50	167	23.5294	50	158	29.4118	50
KEGG - Bisphenol A degradation	63	38.0952	14.2857	50	16.6667	14.2857	50	19.0476	14.2857	21	14.2857	14.2857	18	14.2857	14.2857	19	9.52381	14.2857	19	16.6667	14.2857	19	14.2857	14.2857	19	19.0476	14.2857	19	19.0476	14.2857	18	14.2857	14.2857	48	26.1905	14.2857
KEGG - Blood group glycolipid biosynthesis-lactoseries	3	5.26316	14.2857	4	10.5263	14.2857	4	10.5263	14.2857	1	16.6667	14.2857	2	16.6667	14.2857	0	0	14.2857	0	0	14.2857	0	0	14.2857	0	0	14.2857	1	16.6667	14.2857	0	0	14.2857	4	15.7895	14.2857
KEGG - Blood group glycolipid biosynthesis-neolactoseries	47	25.8065	5.88235	38	32.2581	5.88235	39	32.2581	5.88235	19	14.2857	5.88235	27	22.5806	5.88235	18	12.9032	5.88235	15	9.67742	5.88235	30	12.9032	5.88235	35	16.129	5.88235	35	25.8065	5.88235	20	12.9032	5.88235	45	29.0323	5.88235
KEGG - C5-Branched dibasic acid metabolism	160	60	25	91	20	25	108	25	25	141	26.6667	25	141	26.6667	25	141	26.6667	25	141	26.6667	25	141	26.6667	25	141	26.6667	25	141	26.6667	25	141	26.6667	25	141	26.6667	25
KEGG - Calcium signaling pathway	3	46.9388		3	42.3469		3	42.3469		3	34.6939		3	34.6939		3	32.6531		3	36.7347		3	38.2653		3	38.7755		3	37.2449		3	37.2449		3	47.9592
KEGG - Caprolactam degradation	163	35.5932	25	119	20.339	25	114	23.7288	25	51	5.08475	25	47	5.08475	25	102	8.47458	25	137	16.9492	25	131	15.2542	25	141	20.339	25	138	27.1186	25	115	18.6441	25	158	42.3729	25
KEGG - Cell cycle	3	63.8095		4	60		4	60		4	41.9048		4	41.9048		4	40.9524		4	40.9524		4	40		4	44.7619		4	40		4	40		4	40.9524
KEGG - Cholera - Colonization	1	10.3448		1	3.44828		1	10.3448		1	3.44828		1	3.44828		1	6.89655		1	3.44828		1	13.7931		1	3.44828		1	3.44828		1	3.44828		1	3.44828
KEGG - Cholera - Diarrhea	1	15.3846		0	0		1	7.69231		0	0		0	0		1	7.69231		0	0		1	7.69231		0	0		0	0		0	0		0	0
KEGG - Cholera - Environment	1	13.3333		0	0		1	13.3333		0	0		0	0		0	0		0	0		1	26.6667		0	0		0	0		0	0		0	0
KEGG - Cholera - Infection	2	87.8049		2	80.4878		2	80.4878		1	85.3659		1	85.3659		2	80.4878		1	85.3659		1	85.3659		2	85.3659		2	85.3659		2	82.9268		2	85.3659
KEGG - Cholera - Life cycle	1	10.8108		1	2.7027		1	10.8108		1	2.7027		1	2.7027		1	5.40541		1	2.7027		1	13.5135		1	2.7027		1	2.7027		1	2.7027		1	2.7027
KEGG - Chondroitin / Heparan sulfate biosynthesis	0	0	33.3333	0	0	33.3333	0	0	33.3333	0	0	33.3333	0	0	33.3333	0	0	33.3333	0	0	33.3333	0	0	33.3333	0	0	33.3333	0	0	33.3333	0	0	33.3333	0	0	33.3333
KEGG - Circadian rhythm	5	25.7143		5	28.5714		5	28.5714		5	28.5714		5	25.7143		5	17.1429		5	20		5	20		5	22.8571		5	22.8571		5	22.8571		5	25.7143
KEGG - Complement and coagulation cascades	3	1.44928		3	5.7971		3	4.34783		0	0		0	0		3	1.44928		0	0		3	1.44928		2	1.44928		3	2.89855		3	2.89855		3	20.2899
KEGG - Cyanoamino acid metabolism	204	44	22.2222	189	28	22.2222	188	28	22.2222	183	24	22.2222	183	24	22.2222	185	28	22.2222	185	28	22.2222	189	60	22.2222	185	28	22.2222	185	24	22.2222	185	28	22.2222	204	32	22.2222
KEGG - Cytokine-cytokine receptor interaction	1	0.387597		3	3.48837		3	3.48837		0	0		0	0		3	3.48837		3	1.55039		3	1.93798		3	1.93798		3	1.16279		3	1.93798		3	4.26357
KEGG - DNA polymerase	243	76		242	56		239	48		249	60		249	60		249	68		249	72		249	68		248	72		249	60		249	64		249	56
KEGG - Dentatorubropallidoluysian atrophy (DRPLA)	3	40		3	40		3	33.3333		3	26.6667		3	26.6667		3	33.3333		3	33.3333		3	33.3333		3	33.3333		3	26.6667		3	33.3333		3	40
KEGG - Diterpenoid biosynthesis	3	16.6667	10	0	0	10	0	0	10	0	0	10	0	0	10	0	0	10	0	0	10	0	0	10	0	0	10	0	0	10	0	0	10	0	0	10
KEGG - Dorso-ventral axis formation	1	19.4444		1	36.1111		1	36.1111		1	22.2222		1	25		1	33.3333		1	33.3333		1	36.1111		1	30.5556		1	36.1111		1	36.1111		1	33.3333
KEGG - ECM-receptor interaction	3	12.7907		3	13.9535		3	11.6279		3	8.13953		3	9.30233		3	6.97674		3	8.13953		3	11.6279		3	13.9535		3	22.093		3	27.907		3	53.4884
KEGG - Flagellar assembly	85	4.34783		51	2.89855		42	2.94118		59	2.89855		63	2.89855		51	2.89855		43	4.41176		46	4.41176		45	2.94118		46	2.94118		45	2.94118		55	2.94118
KEGG - Flavonoid biosynthesis	15	22.2222	9.09091	18	22.2222	4.54545	18	22.2222	4.54545	0	0	4.54545	0	0	4.54545	0	0	4.54545	1	20	4.54545	1	40	4.54545	1	20	4.54545	1	40	4.54545	1	20	4.54545	1	40	4.54545
KEGG - Focal adhesion	3	46.1538		3	45.2991		3	44.8718		3	34.188		3	32.906		3	44.0171		3	41.453		3	42.3077		3	43.1624		3	47.4359		3	50		3	61.1111
KEGG - Ganglioside biosynthesis	48	29.0323	12.5	39	32.2581	12.5	38	32.2581	12.5	22	17.3913	12.5	29	22.5806	12.5	22	16.129	12.5	19	12.9032	12.5	34	16.129	12.5	39	19.3548	12.5	38	25.8065	12.5	24	16.129	12.5	46	29.0323	12.5
KEGG - Globoside metabolism	45	25	20	37	31.25	20	38	31.25	20	18	14.2857	20	25	21.875	20	18	12.5	20	15	9.375	20	30	12.5	20	35	15.625	20	34	25	20	20	12.5	20	46	28.125	20
KEGG - Glycosaminoglycan degradation	10	18.75		6	12.5		6	12.5		0	0		1	9.09091		2	9.09091		1	9.09091		3	36.3636		1	9.09091		0	0		0	0		10	14.2857
KEGG - Glycosylphosphatidylinositol(GPI)-anchor biosynthesis	3	58.0645		4	29.0323		4	35.4839		4	19.3548		4	19.3548		4	16.129		4	25.8065		4	22.5806		4	25.8065		4	29.0323		4	25.8065		4	35.4839
KEGG - Hedgehog signaling pathway	4	37.037		4	38.8889		4	38.8889		4	25.9259		4	29.6296		4	31.4815		4	35.1852		4	31.4815		4	37.037		4	33.3333		4	35.1852		4	38.8889
KEGG - High-mannose type N-glycan biosynthesis	10	80		6	40		6	33.3333		2	21.4286		2	28.5714		3	42.8571		3	35.7143		3	35.7143		3	50		3	21.4286		3	35.7143		6	33.3333
KEGG - Huntington's disease	3	57.1429		3	39.2857		3	39.2857		3	42.8571		3	46.4286		3	32.1429		3	35.7143		3	39.2857		3	46.4286		3	32.1429		3	42.8571		3	46.4286
KEGG - Jak-STAT signaling pathway	4	20.7547		4	12.5786		4	11.9497		4	12.5786		4	11.9497		4	13.8365		4	13.8365		4	13.8365		4	13.2075		4	13.8365		4	13.2075		4	13.8365
KEGG - Keratan sulfate biosynthesis	0	0		0	0		0	0		0	0		0	0		0	0		0	0		0	0		0	0		0	0		0	0		0	0
KEGG - Lipopolysaccharide biosynthesis	17	6.89655	20	14	7.40741	20	19	7.40741	20	44	6.89655	20	39	6.89655	20	51	3.44828	20	45	3.44828	20	52	6.89655	20	44	3.44828	20	51	3.44828	20	4	7.69231	20	51	6.89655	20
KEGG - MAPK signaling pathway	4	54.7325		5	46.9136		5	46.9136		5	37.037		5	35.3909		5	44.856		5	42.7984		5	41.9753		5	44.0329		5	45.2675		5	44.0329		5	48.9712
KEGG - Monoterpenoid biosynthesis	1	100	33.3333	0	0	11.1111	0	0	11.1111	0	0	11.1111	0	0	11.1111	0	0	11.1111	0	0	11.1111	0	0	11.1111	0	0	11.1111	0	0	11.1111	0	0	11.1111	0	0	11.1111
KEGG - N-Glycan degradation	27	57.8947		2	50		2	42.8571		2	28.5714		2	28.5714		2	35.7143		3	50		4	57.1429		2	35.7143		2	42.8571		2	21.4286		8	40
KEGG - Neuroactive ligand-receptor interaction	2	1.01695		2	0.338983		3	0.338983		3	0.677966		3	0.677966		3	0.677966		3	0.677966		3	0.677966		3	0.677966		3	0.677966		3	0.677966		3	0.677966
KEGG - Neurodegenerative Disorders	3	32.3529		3	26.4706		3	23.5294		3	23.5294		3	23.5294		3	26.4706		3	23.5294		3	26.4706		3	26.4706		3	20.5882		3	29.4118		3	32.3529
KEGG - Nicotinate and nicotinamide metabolism	234	88.8889	12.5	232	88.8889	12.5	231	88.8889	12.5	231	80	12.5	226	80	12.5	202	91.1111	12.5	207	86.6667	12.5	210	92.2222	12.5	202	91.1111	12.5	208	91.1111	12.5	198	92.2222	12.5	212	93.3333	12.5
KEGG - Nitrobenzene degradation	108	45.4545	20	65	36.3636	20	63	39.3939	20	68	39.3939	20	33	39.3939	20	64	39.3939	20	94	45.4545	20	98	39.3939	20	79	48.4848	20	95	45.4545	20	99	45.4545	20	67	33.3333	20
KEGG - None	3	68.0556		3	55.5556		3	55.5556		3	49.3056		3	50		3	45.8333		3	51.3889		3	51.3889		3	52.7778		3	52.7778		3	52.7778		3	59.7222
KEGG - Nonribosomal peptide structures	1	100		0	0		0	0		0	0		0	0		0	0		0	0		0	0		0	0		0	0		0	0		0	0
KEGG - Notch signaling pathway	4	32		4	48		4	48		4	38		4	46		4	30		4	28		4	30		4	30		4	34		4	26		4	54
KEGG - One carbon pool by folate	242	85	100	217	40	100	217	40	100	215	45	100	216	45	100	231	50	100	230	50	100	231	50	100	237	50	100	231	50	100	230	50	100	227	45	100
KEGG - Parkinson's disease	3	64.7059		3	64.7059		3	64.7059		3	58.8235		3	58.8235		3	52.9412		3	58.8235		3	64.7059		3	58.8235		3	58.8235		3	58.8235		3	70.5882
KEGG - Peptidoglycan biosynthesis	87	14.6341	13.3333	189	9.7561	13.3333	188	9.7561	13.3333	4	5	13.3333	8	10	13.3333	188	7.31707	13.3333	192	12.1951	13.3333	190	12.1951	13.3333	192	12.1951	13.3333	191	12.1951	13.3333	190	14.6341	13.3333	191	12.1951	13.3333
KEGG - Phosphatidylinositol signaling system	18	93.8596		19	96.4912		18	96.4912		19	85.9649		19	86.8421		19	95.614		19	92.9825		19	95.614		18	95.614		19	95.614		19	96.4912		19	96.4912
KEGG - Phosphotransferase system (PTS)	0	0		0	0		0	0		0	0		0	0		0	0		0	0		0	0		0	0		0	0		0	0		0	0
KEGG - Photosynthesis	10	44.0367		10	29.3578		10	29.3578		10	43.1193		10	42.2018		10	40.367		10	42.2018		10	43.1193		10	42.2018		10	41.2844		10	41.2844		10	41.2844
KEGG - Porphyrin and chlorophyll metabolism	233	40.4255	11.1111	158	17.0213	11.1111	159	17.0213	11.1111	229	19.1489	11.1111	228	19.1489	11.1111	234	27.6596	11.1111	234	31.9149	11.1111	234	23.4043	11.1111	233	31.9149	11.1111	234	31.9149	11.1111	234	27.6596	11.1111	234	25.5319	11.1111
KEGG - Prion disease	3	63.6364		3	36.3636		3	27.2727		3	45.4545		3	54.5455		3	27.2727		3	36.3636		3	54.5455		3	54.5455		3	36.3636		3	45.4545		3	63.6364
KEGG - Prostaglandin and leukotriene metabolism	20	16.1765		14	10.2564		14	10.2564		15	12.8205		15	12.8205		13	10.2564		13	12.8205		13	12.8205		13	12.8205		13	12.8205		13	15.3846		15	23.0769
KEGG - Proteasome	7	100		8	100		8	98.0769		8	100		8	100		8	100		8	100		8	100		8	100		8	100		8	98.0769		8	98.0769
KEGG - Protein export	248	45.1613		241	38.7097		242	38.7097		240	51.6129		240	38.7097		243	35.4839		240	38.7097		240	35.4839		239	45.1613		242	41.9355		241	38.7097		241	38.7097
KEGG - RNA polymerase	243	89.4737		245	63.1579		244	63.1579		245	84.2105		245	84.2105		245	84.2105		245	81.5789		245	78.9474		244	86.8421		245	81.5789		245	76.3158		242	86.8421
KEGG - Regulation of actin cytoskeleton	3	55.3991		3	42.2535		3	42.2535		3	34.7418		3	33.3333		3	38.9671		3	38.9671		3	38.4977		3	40.3756		3	39.4366		3	38.4977		3	46.0094
KEGG - Retinol metabolism	4	75	40	0	0	20	0	0	20	0	0	20	0	0	20	0	0	20	0	0	20	0	0	20	0	0	20	0	0	20	0	0	20	4	50	20
KEGG - Ribosome	247	89.8876		248	76.4045		247	76.4045		248	89.5131		248	87.2659		248	80.5243		248	86.1423		248	83.1461		247	83.5206		248	88.3895		248	76.779		248	81.6479
KEGG - TGF-beta signaling pathway	4	27.0588		4	30.5882		4	31.7647		4	20		4	21.1765		4	24.7059		4	24.7059		4	27.0588		4	27.0588		4	25.8824		4	22.3529		4	31.7647
KEGG - Taurine and hypotaurine metabolism	103	66.6667	22.2222	2	16.6667	22.2222	2	16.6667	22.2222	1	16.6667	22.2222	1	16.6667	22.2222	2	33.3333	22.2222	1	16.6667	22.2222	1	16.6667	22.2222	1	16.6667	22.2222	1	16.6667	22.2222	2	33.3333	22.2222	2	16.6667	22.2222
KEGG - Tetrachloroethene degradation	56	40	50	42	20	25	42	24	25	12	15.7895	25	10	21.4286	25	13	16	25	24	20	25	22	35.7143	25	25	20	25	23	20	25	24	20	25	46	28	25
KEGG - Tight junction	3	53.6		3	41.6		3	40.8		3	40		3	38.4		3	38.4		3	41.6		3	41.6		3	43.2		3	42.4		3	41.6		3	43.2
KEGG - Toll-like receptor signaling pathway	3	42.8571		3	33.6735		3	34.6939		3	32.6531		3	32.6531		3	30.6122		3	31.6327		3	30.6122		3	35.7143		3	35.7143		3	33.6735		3	37.7551
KEGG - Tryptophan metabolism	234	57.1429	10.3448	162	23.0769	6.89655	161	23.0769	6.89655	233	20.8791	6.89655	234	19.7802	6.89655	227	23.0769	6.89655	221	28.5714	6.89655	223	26.3736	6.89655	226	34.0659	6.89655	233	31.8681	6.89655	233	31.8681	6.89655	227	45.0549	6.89655
KEGG - Two-component system	14	27.5862		5	4.5977		11	20.6897		4	3.44828		4	3.44828		11	16.092		5	4.5977		11	12.6437		5	4.5977		6	4.5977		5	4.5977		5	5.74713
KEGG - Type I polyketide structures	1	25		1	50		1	50		0	0		0	0		0	0		1	50		1	62.5		1	50		1	50		1	50		1	50
KEGG - Type II secretion system	80	5.06329		65	3.63636		65	3.63636		0	0		0	0		0	0		9	4.54545		23	1.6129		10	4.54545		15	1.88679		10	5.88235		13	1.88679
KEGG - Type III secretion system	94	9.7561		67	7.31707		62	7.31707		77	7.31707		81	7.31707		67	7.31707		67	7.31707		68	7.31707		68	7.31707		74	7.31707		71	7.31707		76	7.31707
KEGG - Type IV secretion system	2	6.66667		2	6.66667		1	6.66667		2	6.66667		0	0		3	10		5	6.66667		5	6.66667		5	13.3333		4	6.66667		2	6.66667		2	6.66667
KEGG - Ubiquitin mediated proteolysis	14	84.4444		15	73.3333		14	73.3333		15	62.2222		15	66.6667		15	71.1111		15	71.1111		15	73.3333		14	75.5556		15	71.1111		15	68.8889		15	77.7778
