# Supplementary material for: Comparative Genomics of Cryptosporidium
Source: Int J Genomics. 2013 May 2;2013:832756. doi: 10.1155/2013/832756 (PMC3659464; doi:10.1155/2013/832756)
Supplement: Supplementary file 1 — Supplementary Figure 1: Synteny of Plasmodia and Cryptosporidia genus Position of the orthologs identified in the genomes of C. parvum, P. falciparum, P. knowlesi and P. vivax. For each pair of species, a green cross denotes an ortholog present in the same strand in both genomes, while a red cross denotes an inversion. Supplementary Figure 2: Genome Compactness Comparison of the genome compactness of well-studied apicomplexans, as the average number of putative paralogs per genes. Supplementary Figure 3: Pathway Scores See Figure 1. Supplementary Table 1: Chromosomes Composition Results of the statistical evaluation performed using the Fisher's exact test of the enrichment of the Plasmodia chromosomes in orthologs identified in C. parvum. Values of enrichment are given as the log2 of the ratio between the fraction of orthologs in a given Plasmodium chromosome coming from a same chromosome of C. parvum, and the fraction of orthologs in the whole Plasmodium genome coming from this C. parvum chromosome. A value of 0 (ratio of 1) means that the Plasmodium chromosome contains proportionally as many orthologs from the C. parvum chromosome considered as in the whole genome. The values obtained show that the Plasmodium chromosomes significantly retain the composition of the C. parvum chromosomes. P-values below 0.05 were discarded. Supplementary Table 2: Pathway Scores Completeness, connectedness and support scores of the inferred metabolic pathways of C. hominis and C. parvum, along with nine other apicomplexans and an external reference, S. cerevisiae (see text). Supplementary Table 3: Orthologs Sequence Comparison Results of the pairs of putative orthologs sequences comparisons. Identity: percentage of identity between the two protein sequences. dN/dS: non-synonymous on synonymous substitution rate ratio, or None if undefined (when dS equals to zero). Ti/Tv: transition on transversion ratio. Supplementary Table 4: Protein Localizations Predicted protein localization, bas [file 832756.f1.zip › supplementary_table_3-dn_ds.xls]

## Sheet: Data
C. parvum protein		C. hominis protein		identity	dS	dN	dN/dS	Ti/Tv
Cpro.10001	hypothetical protein	Chro.10010	hypothetical protein	0.97	0.0555	0.0136	0.245045	20.9673
Cpro.10002	hypothetical protein	Chro.10011	hypothetical protein	0.97	0.0433	0.0141	0.325635	23.9434
Cpro.10003	hypothetical protein	Chro.10012	hypothetical protein	0.981	0.0489	0.0084	0.171779	8.9482
Cpro.10004	solute carrier family 35, member 2, putative	Chro.10013	solute carrier family 35, member 2	0.988	0.0626	0.0054	0.086262	8.1526
Cpro.10005	hypothetical protein	Chro.10014	hypothetical protein	0.988	0.0841	0.0049	0.058264	3.4019
Cpro.10006	putative cyclin dependent kinase A	Chro.10015	cyclin dependent kinase A	0.987	0.0997	0.0041	0.0411234	2.5766
Cpro.10007	hypothetical protein	Chro.10016	hypothetical protein	1	0.0473	0	0	4.6
Cpro.10008	hypothetical protein	Chro.10017	hypothetical protein	0.966	0.103	0.0147	0.142718	4.1769
Cpro.10009	hypothetical protein	Chro.10018	hypothetical protein	0.962	0.0378	0.0166	0.439153	6.0042
Cpro.10010	RloD	Chro.10019	hypothetical protein	0.978	0.0712	0.0099	0.139045	8.5427
Cpro.10012	hypothetical protein	Chro.10021	hypothetical protein	0.776	0.1214	0.1141	0.939868	7.6965
Cpro.10013	hypothetical protein	Chro.10022	hypothetical protein	0.791	0.136	0.09	0.661765	5.5973
Cpro.10014	hypothetical protein	Chro.10023	hypothetical protein	0.881	0.0875	0.0476	0.544	3.9833
Cpro.10015	hypothetical protein	Chro.10024	hypothetical protein	0.877	0.0438	0.0609	1.39041	2.4249
Cpro.10016	hypothetical protein	Chro.10026	hypothetical protein	0.921	0.0637	0.0274	0.430141	5.8758
Cpro.10017	hypothetical protein	Chro.10027	hypothetical protein	0.989	0.0509	0.0046	0.0903733	4.6
Cpro.10018	hypothetical protein	Chro.10028	hypothetical protein	0.964	0.0457	0.0103	0.225383	14.776
Cpro.10019	putative Fe-hydrogenase	Chro.10029	Fe-hydrogenase	0.98	0.0874	0.0086	0.0983982	11.5008
Cpro.10020	ADP-ribosylation factor-like protein 2 (ARL2)	Chro.10030	ADP-ribosylation factor-like protein 2 (ARL2)	0.987	0.0334	0.0056	0.167665	4.6
Cpro.10021	hypothetical protein	Chro.10031	hypothetical protein	0.961	0.0367	0.0182	0.495913	4.6
Cpro.10022	GPI-anchor transamidase (U32517) -related	Chro.10032	GPI-anchor transamidase (U32517) -related	0.969	0.0462	0.0137	0.296537	8.3329
Cpro.10023	ENSANGP00000013950	Chro.10033	ENSANGP00000013950	0.991	0.0426	0.0036	0.084507	4.6
Cpro.10024	hypothetical protein	Chro.10034	hypothetical protein	0.975	0.1073	0.0112	0.10438	4.6
Cpro.10025	putative ATP-dependent RNA helicase	Chro.10035	ATP-dependent RNA helicase	0.992	0.0689	0.0036	0.0522496	9.2426
Cpro.10026	hypothetical protein	Chro.10036	hypothetical protein	0.952	0.0493	0.0208	0.421907	14.9891
Cpro.10027	hypothetical protein	Chro.10038	hypothetical protein	0.988	0.0346	0.0056	0.16185	4.6
Cpro.10028	dehydrogenase/reductase (SDR family) member 7; CGI-86 protein; retinal short-chain dehydrogenase/reductase 4; 2310016E22Rik	Chro.10039	dehydrogenase/reductase (SDR family) member 7\; CGI-86 protein\; retinal short-chain dehydrogenase/reductase 4\; 2310016E22Rik	0.981	0.0415	0.0085	0.204819	10.2048
Cpro.10029	tRNA-guaninine transglycosylase, putative, putative	Chro.10040	tRNA-guaninine transglycosylase	0.994	0.065	0.0027	0.0415385	4.6
Cpro.10030	apurinic/apyrimidinic endonuclease Apn1	Chro.10041	apurinic/apyrimidinic endonuclease Apn1	0.991	0.0471	0.0036	0.0764331	3.6557
Cpro.10031	similar to oxysterol-binding protein-like protein 3 isoform a; oxysterol-binding protein-related protein 3; oxysterol-binding protein 3; OSBP-related protein 3	Chro.10042	similar to oxysterol-binding protein-like protein 3 isoform a\; oxysterol-binding protein-related protein 3\; oxysterol-binding protein 3\; OSBP-related protein 3	0.983	0.0464	0.0071	0.153017	5.0764
Cpro.10032	cell division cycle protein 48 homolog	Chro.10043	cell division cycle protein 48	0.996	0.0638	0.0025	0.039185	11.8511
Cpro.10033	hypothetical protein	Chro.10044	hypothetical protein	0.995	0.0404	0.0023	0.0569307	11.6063
Cpro.10034	MGC53361 protein	Chro.10045	hypothetical protein	0.97	0.0447	0.0128	0.286353	2.6341
Cpro.10035	hypothetical protein	Chro.10046	similar to Noc2p N-terminus	0.978	0.0508	0.0111	0.218504	6.0337
Cpro.10036	ENSANGP00000020553	Chro.10047	hypothetical protein	0.978	0.0654	0.01	0.152905	5.2798
Cpro.10038	hypothetical protein	Chro.10049	ubiquinone biosynthesis protein COQ4 (Coenzyme Q biosynthesis protein 4 ) (CGI-92)	0.974	0.0467	0.0114	0.244111	6.0396
Cpro.10039	similar to Golgi coiled coil protein GCC185	Chro.10050	GM14490p	0.996	0.043	0.0016	0.0372093	4.6
Cpro.10040	protein kinase, putative	Chro.10051	protein kinase	0.97	0.0792	0.0122	0.15404	26.0435
Cpro.10041	ubiquitin conjugating enzyme E2, putative	Chro.10052	ubiquitin conjugating enzyme E2	1	0.1099	0	0	4.6
Cpro.10042	hypothetical protein	Chro.10053	hypothetical protein	1	0.0199	0	0	4.6
Cpro.10043	20S proteasome beta subunit D2 (PBD2)	Chro.10054	20S proteasome beta subunit D2 (PBD2)	1	0.1002	0	0	1.599
Cpro.10044	hypothetical protein	Chro.10055	hypothetical protein	0.963	0.0558	0.0154	0.275986	4.1881
Cpro.10045	hypothetical protein	Chro.10056	hypothetical protein	0.961	0.0601	0.0176	0.292845	7.0759
Cpro.10046	hypothetical protein	Chro.10057	hypothetical protein	0.748	0.1836	0.1033	0.562636	4.4115
Cpro.10047	hypothetical protein	Chro.10058	hypothetical protein	0.945	0.0632	0.0265	0.419304	13.6051
Cpro.10048	hypothetical protein	Chro.10059	hypothetical protein	0.977	0.0809	0.0097	0.119901	3.7164
Cpro.10049	unknown protein	Chro.10060	hypothetical protein	0.984	0.0958	0.0067	0.0699374	7.2137
Cpro.10050	hypothetical protein	Chro.10061	hypothetical protein	0.981	0.0677	0.0077	0.113737	10.9947
Cpro.10051	vacuolar ATP synthetase, putative	Chro.10062	vacuolar ATP synthetase	1	0.0554	0	0	4.6
Cpro.10052	Vacuolar ATP synthase 16 kDa proteolipid subunit (V-ATPase 16 kDa proteolipid subunit) gi|1208770|gb|AAB67833.1| V-type ATPase 16 kDa proteolipid subunit gi|2149129|gb|AAB58498.1| vacuolar-type H(+)-ATPase	Chro.10063	vacuolar ATP synthase 16 kDa proteolipid subunit (V-ATPase 16 kDa proteolipid subunit)	0.994	0.0542	0.0024	0.0442804	4.6
Cpro.10053	hypothetical protein	Chro.10065	hypothetical protein	0.963	0.063	0.0161	0.255556	5.3256
Cpro.10054	hypothetical protein	Chro.10066	hypothetical protein	0.952	0.0876	0.0193	0.22032	3.2437
Cpro.10055	hypothetical protein	Chro.10067	hypothetical protein	0.963	0.0695	0.016	0.230216	4.6
Cpro.10056	hypothetical protein	Chro.10068	hypothetical protein	0.983	0.0852	0.0073	0.0856808	3.6872
Cpro.10057	dynamin-like protein	Chro.10069	dynactin 4 (p62)	0.996	0.096	0.0017	0.0177083	21.009
Cpro.10058	hypothetical protein	Chro.10070	hypothetical protein	0.842	0.0966	0.0577	0.597308	5.5308
Cpro.10059	putative oxoglutarate/malate translocator protein	Chro.10071	oxoglutarate/malate translocator protein	0.985	0.0673	0.0067	0.0995542	8.9064
Cpro.10060	expressed protein	Chro.10072	hypothetical protein	0.979	0.0176	0.013	0.738636	5.6945
Cpro.10061	hypothetical protein	Chro.10073	hypothetical protein	0.983	0.028	0.0073	0.260714	1.909
Cpro.10062	MAR binding filament-like protein 1 gi|7489035|pir||T07111 MAR binding filament-like protein 1 - tomato gi|1771158|emb|CAA69181.1| MFP1 protein	Chro.10074	hypothetical protein	0.886	0.0736	0.0538	0.730978	5.4948
Cpro.10063	hypothetical protein	Chro.10075	hypothetical protein	0.994	0.0706	0.0029	0.0410765	6.6927
Cpro.10064	hypothetical protein	Chro.10076	hypothetical protein	0.949	0.0595	0.0244	0.410084	8.9733
Cpro.10065	hypothetical protein	Chro.10078	hypothetical protein	0.959	0.0569	0.0173	0.304042	2.9368
Cpro.10066	hypothetical protein	Chro.10079	hypothetical protein	0.985	0.0643	0.0064	0.0995334	4.6
Cpro.10067	hypothetical protein	Chro.10080	hypothetical protein	0.993	0.0336	0.0028	0.0833333	25.2625
Cpro.10068	hypothetical protein	Chro.10081	hypothetical protein	0.811	0.1013	0.0321	0.316881	1.6967
Cpro.10069	hypothetical protein	Chro.10082	hypothetical protein	0.921	0.1382	0.033	0.238784	3.0254
Cpro.10070	ATP-binding cassette protein	Chro.10084	ATP-binding cassette protein	0.971	0.0821	0.0115	0.140073	12.4344
Cpro.10071	hypothetical protein	Chro.10086	hypothetical protein	0.972	0.0352	0.012	0.340909	3.8325
Cpro.10073	hypothetical protein	Chro.10089	hypothetical protein	0.983	0.0911	0.0068	0.0746432	0.6942
Cpro.10074	hypothetical protein	Chro.10091	hypothetical protein	0.985	0.0493	0.0063	0.127789	4.6
Cpro.10075	similar to ash2	Chro.10092	similar to ash2	0.983	0.0345	0.0074	0.214493	4.6
Cpro.10076	dynein heavy chain, putative	Chro.10094	dynein heavy chain	0.993	0.0646	0.0023	0.0356037	7.197
Cpro.10077	MAP kinase phosphatase	Chro.10095	MAP kinase phosphatase	0.961	0.0749	0.017	0.226969	7.4344
Cpro.10078	hypothetical protein	Chro.10096	hypothetical protein	0.991	0.0705	0.0042	0.0595745	4.6
Cpro.10079	hypothetical protein	Chro.10097	hypothetical protein	0.981	0.041	0.0086	0.209756	6.6139
Cpro.10080	hypothetical protein	Chro.10098	hypothetical protein	0.972	0.0616	0.0118	0.191558	6.006
Cpro.10081	Protein disulfide isomerase CG6988-PA	Chro.10099	hypothetical protein	0.955	0.0438	0.0165	0.376712	11.2271
Cpro.10082	similar to Serine/Threonine kinase 33	Chro.10100	hypothetical protein	0.993	0.0704	0.0031	0.0440341	4.223
Cpro.10083	binding protein, putative	Chro.10101	binding protein	0.992	0.0479	0.0035	0.0730689	8.5818
Cpro.10085	similar to Neurospora crassa. Related to SEN1 protein	Chro.10103	SEN1 protein	0.986	0.0666	0.0063	0.0945946	4.3439
Cpro.10087	hypothetical protein	Chro.10105	hypothetical protein	0.959	0.0835	0.0167	0.2	2.0454
Cpro.10088	Unknown (protein for MGC:73211)	Chro.10106	hypothetical protein	0.993	0.0092	0.0029	0.315217	4.6
Cpro.10089	cyclophilin homolog Ta cyp	Chro.10107	cyclophilin Ta cyp	0.986	0.0607	0.0061	0.100494	3.9237
Cpro.10090	Eukaryotic initiation factor 4A (eIF4A) (eIF-4A) gi|2150025|gb|AAB58726.1| translation initiation factor	Chro.10108	eukaryotic initiation factor 4A (eIF4A) (eIF-4A)	1	0.0644	0	0	4.6
Cpro.10091	Protein kinase domain, putative	Chro.10109	protein kinase domain	0.975	0.064	0.0109	0.170313	7.3042
Cpro.10092	similar to Arabidopsis thaliana (Mouse-ear cress). Hypothetical protein (AT4g12040/F16J13_110)	Chro.10110	zinc finger transcription factor ZFP33	0.99	0.0681	0.0045	0.0660793	4.6
Cpro.10093	actin, putative	Chro.10111	actin	0.997	0.0627	0.001	0.015949	4.6
Cpro.10094	hypothetical protein, conserved	Chro.10112	hypothetical protein	0.99	0.0652	0.0031	0.047546	3.6388
Cpro.10096	hypothetical protein	Chro.10114	hypothetical protein	0.994	0	0.0025	None	4.6
Cpro.10097	hypothetical protein	Chro.10115	transmembrane protein	0.99	0.0608	0.0044	0.0723684	8.2313
Cpro.10100	hypothetical protein	Chro.10118	hypothetical protein	0.942	0.067	0.0168	0.250746	5.6911
Cpro.10101	RNase L inhibitor-like protein	Chro.10119	RNase L inhibitor-like protein	0.998	0.0666	0.0007	0.0105105	7.0052
Cpro.10102	hypothetical protein	Chro.10120	NAD(P) transhydrogenase beta subunit	0.984	0.0572	0.0068	0.118881	16.6332
Cpro.10103	hypothetical protein	Chro.10121	hypothetical protein	0.98	0.0486	0.0086	0.176955	9.6569
Cpro.10104	hypothetical protein	Chro.10122	hypothetical protein	0.983	0.0655	0.0071	0.108397	3.7144
Cpro.10105	hypothetical protein	Chro.10123	hypothetical protein	0.971	0.0462	0.0122	0.264069	4.6
Cpro.10106	hypothetical protein	Chro.10124	hypothetical protein	0.949	0.1223	0.0324	0.264922	4.1526
Cpro.10107	hypothetical protein	Chro.10125	hypothetical protein	0.984	0.0865	0.0042	0.0485549	1.8573
Cpro.10108	hypothetical protein	Chro.10126	hypothetical protein	0.956	0.0486	0.0172	0.353909	2.8715
Cpro.10109	hypothetical protein	Chro.10127	hypothetical protein	0.966	0.0317	0.019	0.599369	4.6
Cpro.10110	RNA recognition motif, putative	Chro.10128	RNA recognition motif	0.994	0.0598	0.0026	0.0434783	4.6
Cpro.10111	hypothetical protein	Chro.10129	hypothetical protein	0.94	0.2434	0.0555	0.22802	1.0279
Cpro.10112	hypothetical protein	Chro.10130	hypothetical protein	0.974	0.0479	0.01	0.208768	6.9053
Cpro.10113	hypothetical protein Rv1835c	Chro.10131	hypothetical protein	0.998	0.0592	0.0009	0.0152027	10.026
Cpro.10115	Hypothetical protein CBG01950	Chro.10133	hypothetical protein	0.971	0.0409	0.0115	0.281174	6.5114
Cpro.10116	hypothetical protein	Chro.10134	hypothetical protein	0.967	0.0569	0.0155	0.272408	12.9391
Cpro.10117	hypothetical protein	Chro.10135	sf-assemblin-like protein	0.987	0.0647	0.0053	0.0819165	4.083
Cpro.10118	acyl-CoA binding protein	Chro.10136	similar to proteasome 26S subunit, non-ATPase, 10-related	0.985	0.0724	0.0066	0.0911602	5.5275
Cpro.10119	hypothetical protein	Chro.10137	hypothetical protein	0.937	0.0861	0.0283	0.328688	3.7002
Cpro.10120	hypothetical protein	Chro.10138	hypothetical protein	0.96	0.0285	0.0193	0.677193	17.5985
Cpro.10121	UCHL5 protein	Chro.10139	UCHL5 protein	0.989	0.0584	0.0058	0.0993151	0.9796
Cpro.10122	DNA repair protein RAD54-like	Chro.10140	DNA repair protein RAD54-like	0.985	0.0623	0.0074	0.11878	12.4591
Cpro.10123	hypothetical protein	Chro.10141	hypothetical protein	0.987	0.1033	0.0055	0.053243	7.0564
Cpro.10124	hypothetical protein	Chro.10142	hypothetical protein	0.977	0.0951	0.0099	0.104101	5.1301
Cpro.10125	CBK1	Chro.10143	CBK1	0.983	0.0707	0.0078	0.110325	31.2758
Cpro.10126	hypothetical protein	Chro.10144	hypothetical protein	0.967	0.0668	0.0154	0.230539	8.582
Cpro.10127	hypothetical protein	Chro.10145	hypothetical protein	0.993	0.0493	0.0029	0.0588235	6.6419
Cpro.10128	hypothetical protein	Chro.10146	hypothetical protein	0.975	0.0642	0.0121	0.188474	6.6409
Cpro.10129	hypothetical protein	Chro.10147	hypothetical protein	0.955	0.0365	0.0145	0.39726	5.381
Cpro.10130	hypothetical protein	Chro.10148	hypothetical protein	0.997	0.0599	0.0012	0.0200334	12.5323
Cpro.10131	hypothetical protein	Chro.10149	hypothetical protein	0.996	0.0481	0.0019	0.039501	3.5003
Cpro.10132	hypothetical protein	Chro.10150	hypothetical protein	0.989	0.0437	0.0051	0.116705	4.6
Cpro.10133	SPINDLY protein	Chro.10151	SPY protein	0.933	0.0683	0.0357	0.522694	2.9062
Cpro.10134	cleavage stimulation factor, putative	Chro.10152	cleavage stimulation factor	0.989	0.0491	0.0044	0.089613	3.9201
Cpro.10135	hypothetical protein	Chro.10153	hypothetical protein	1	0.0521	0	0	3.3183
Cpro.10136	hypothetical protein	Chro.10154	hypothetical protein	1	0.1182	0	0	14.9944
Cpro.10137	SWI/SNF-related, matrix associated, actin-dependent regulator of chromatin subfamily A containing DEAD/H box 1 (Enhancer trap locus homolog 1) (Etl-1)	Chro.10155	SWI/SNF-related, matrix associated, actin-dependent regulator of chromatin subfamily A containing DEAD/H box 1	0.989	0.043	0.0059	0.137209	9.1419
Cpro.10138	hypothetical protein	Chro.10156	hypothetical protein	0.977	0.0853	0.0115	0.134818	4.1218
Cpro.10139	abc transporter (1D44)	Chro.10157	ABC transporter (1D44)	0.981	0.0502	0.0097	0.193227	7.8753
Cpro.10140	hypothetical protein	Chro.10158	hypothetical protein	0.955	0.0683	0.0226	0.330893	6.7053
Cpro.10141	protein phosphatase 2B regulatory subunit	Chro.10159	protein phosphatase 2B regulatory subunit	0.981	0.1028	0.0085	0.0826848	21.6781
Cpro.10142	cell cycle regulator with zn-finger domain, putative	Chro.10160	cell cycle regulator with zn-finger domain	0.98	0.0405	0.009	0.222222	3.9709
Cpro.10143	hypothetical protein	Chro.10161	hypothetical protein	0.963	0.0708	0.0166	0.234463	4.6226
Cpro.10144	hypothetical protein	Chro.10162	hypothetical protein	0.99	0.0962	0.0047	0.0488565	4.6
Cpro.10145	hypothetical protein	Chro.10163	hypothetical protein	0.988	0.0598	0.0052	0.0869565	4.6
Cpro.10146	DNA repair and meiosis protein Mre11 (emb|CAB50793.1)	Chro.10164	DNA repair and meiosis protein Mre11 (emb|CAB50793.1)	0.986	0.0647	0.006	0.0927357	4.9299
Cpro.10147	hypothetical protein	Chro.10165	hypothetical protein	0.94	0.0422	0.0257	0.609005	5.4136
Cpro.10148	hypothetical protein	Chro.10166	hypothetical protein	0.948	0.0759	0.0247	0.325428	12.3094
Cpro.10149	hypothetical protein	Chro.10167	ORF MSV156 protein	0.949	0.0541	0.0237	0.438078	8.8878
Cpro.10150	hypothetical protein	Chro.10168	chloroquine resistance marker protein	0.957	0.0592	0.0196	0.331081	5.9373
Cpro.10152	hypothetical protein	Chro.10170	hypothetical protein	0.98	0.0744	0.0087	0.116935	9.4183
Cpro.10153	hypothetical protein	Chro.10171	hypothetical protein	0.965	0.0486	0.0159	0.32716	12.6626
Cpro.10154	NEK2 protein	Chro.10172	NEK2 protein	0.98	0.0601	0.0097	0.161398	9.905
Cpro.10155	hypothetical protein	Chro.10173	hypothetical protein	0.976	0.0548	0.0115	0.209854	4.7291
Cpro.10156	hypothetical protein	Chro.10174	hypothetical protein	0.989	0.0378	0.0047	0.124339	4.1452
Cpro.10157	hypothetical protein	Chro.10176	hypothetical protein	0.968	0.0882	0.0104	0.117914	2.2841
Cpro.10158	hypothetical protein	Chro.10177	hypothetical protein	0.975	0.0404	0.0113	0.279703	8.5435
Cpro.10159	dynein intermediate chain 2, cytosolic	Chro.10178	dynein intermediate chain 2, cytosolic	0.99	0.0584	0.0051	0.0873288	3.9545
Cpro.10160	hypothetical protein	Chro.10179	hypothetical protein	0.986	0.0517	0.0062	0.119923	3.8785
Cpro.10161	E2f3 protein	Chro.10180	E2f3 protein	0.987	0.0761	0.0056	0.0735874	4.6
Cpro.10162	hypothetical protein	Chro.10181	hypothetical protein	0.955	0.0616	0.0121	0.196429	6.4019
Cpro.10163	HC-23 protein	Chro.10182	HC-23 protein	0.986	0.0603	0.0065	0.107794	18.6496
Cpro.10164	hypothetical protein	Chro.10183	hypothetical protein	0.99	0.0517	0.0046	0.0889749	4.6
Cpro.10165	protein kinase C inhibitor - maize	Chro.10184	hypothetical protein	0.983	0.0479	0.0076	0.158664	4.6
Cpro.10166	hypothetical protein	Chro.10185	hypothetical protein	0.963	0.041	0.0161	0.392683	10.3146
Cpro.10167	hypothetical protein	Chro.10186	hypothetical protein	0.961	0.0442	0.0175	0.395928	7.8079
Cpro.10168	hypothetical protein	Chro.10187	hypothetical protein	0.921	0.0599	0.0362	0.604341	4.6
Cpro.10169	hypothetical protein	Chro.10189	hypothetical protein	0.969	0.0574	0.0146	0.254355	8.6172
Cpro.10170	hypothetical protein	Chro.10190	hypothetical protein	0.992	0.0495	0.0032	0.0646465	4.8897
Cpro.10171	Ribosomal protein L36e	Chro.10191	ribosomal protein L36e	1	0.0373	0	0	5.608
Cpro.10172	Unknown (protein for MGC:63889)	Chro.10192	hypothetical protein	0.88	0.1747	0.0559	0.319977	2.6164
Cpro.10173	Sporozoite developmental protein	Chro.10193	hypothetical protein	0.963	0.06	0.0117	0.195	6.847
Cpro.10174	hypothetical protein	Chro.10194	hypothetical protein	0.961	0.0556	0.017	0.305755	10.2509
Cpro.10175	similar to Leishmania major. Ppg3	Chro.10195	hypothetical protein	0.981	0.0515	0.0082	0.159223	2.8265
Cpro.10176	phosphoglycerate mutase family, putative	Chro.10196	phosphoglycerate mutase family	0.981	0.0554	0.0084	0.151625	7.4263
Cpro.10177	hypothetical protein	Chro.10198	hypothetical protein	0.966	0.0626	0.0159	0.253994	10.0781
Cpro.10178	conserved hypothetical protein	Chro.10199	hypothetical protein	0.93	0.064	0.0374	0.584375	8.6896
Cpro.10179	ENSANGP00000010471	Chro.10200	ENSANGP00000010471	0.95	0.0304	0.0261	0.858553	20.091
Cpro.10180	hypothetical protein	Chro.10201	hypothetical protein	0.965	0.0393	0.0159	0.40458	4.6823
Cpro.10181	hypothetical protein	Chro.10202	hypothetical protein	0.971	0.0416	0.0114	0.274038	2.5637
Cpro.10182	hypothetical protein	Chro.10203	hypothetical protein	0.97	0.0548	0.0139	0.25365	11.2503
Cpro.10183	zinc finger (C3HC4-type RING finger) protein family	Chro.10204	zinc finger (C3HC4-type RING finger) protein family	0.964	0.0506	0.0155	0.306324	4.3815
Cpro.10184	transducin / WD-40 repeat protein family	Chro.10205	transducin / WD-40 repeat protein family	0.978	0.0642	0.0089	0.138629	7.3701
Cpro.10185	hypothetical protein	Chro.10206	hypothetical protein	0.92	0.0775	0.0348	0.449032	3.0536
Cpro.10186	hypothetical protein	Chro.10207	hypothetical protein	0.98	0.0644	0.0083	0.128882	4.6
Cpro.10187	conserved protein, putative	Chro.10208	hypothetical protein	0.985	0.0425	0.0064	0.150588	4.6
Cpro.10188	hypothetical protein	Chro.10209	hypothetical protein	0.962	0.0435	0.0175	0.402299	10.8228
Cpro.10189	G-patch domain, putative	Chro.10210	G-patch domain	0.966	0.0647	0.0145	0.224111	3.1289
Cpro.10190	translation initiation factor EIF-2b alpha subunit, putative	Chro.10211	translation initiation factor EIF-2b alpha subunit	0.981	0.0492	0.0083	0.168699	10.9416
Cpro.10191	hypothetical protein	Chro.10212	hypothetical protein	0.975	0.0697	0.0097	0.139168	4.9683
Cpro.10192	hypothetical protein	Chro.10213	hypothetical protein	0.956	0.0564	0.0212	0.375887	4.1073
Cpro.10193	vesicle transport protein, putative	Chro.10214	vesicle transport protein	0.982	0.0382	0.0082	0.21466	4.6
Cpro.10194	hypothetical protein	Chro.10215	hypothetical protein	1	0.0443	0	0	4.6
Cpro.10195	Uracil phosphoribosyltransferase (UMP pyrophosphorylase) (UPRTase) (UPRT) gi|499106|gb|AAB60213.1| uracil phosphoribosyl transferase	Chro.10216	uracil phosphoribosyltransferase (UMP pyrophosphorylase) (UPRTase) (UPRT)	0.996	0.0557	0.0018	0.032316	4.3604
Cpro.10196	hypothetical protein	Chro.10217	hypothetical protein	0.973	0.0592	0.0122	0.206081	11.6245
Cpro.10197	hypothetical protein	Chro.10218	hypothetical protein	0.955	0.0672	0.0202	0.300595	6.7233
Cpro.10198	retinoblastoma A associated protein; RbAp48	Chro.10221	WD-40 repeat protein MSI1	0.98	0.0588	0.0095	0.161565	4.9843
Cpro.10199	wd-40 repeat protein msi3	Chro.10222	wd-40 repeat protein msi3	0.987	0.1101	0	0	3.3995
Cpro.10200	Chain A, 1.9 Angstrom Resolution Crystal Structure Of The Saccharomyces Cerevisiae Ran-Binding Protein Mog1p	Chro.10223	HSPC236	0.968	0.0458	0.0145	0.316594	8.0109
Cpro.10201	hypothetical protein	Chro.10224	hypothetical protein	0.995	0.0592	0.0021	0.035473	2.2228
Cpro.10202	hypothetical protein, conserved	Chro.10225	hypothetical protein	0.985	0.0613	0.0065	0.106036	4.6
Cpro.10203	hypothetical protein	Chro.10226	hypothetical protein	1	0.0643	0	0	4.6
Cpro.10204	farnesyltransferase, CAAX box, beta	Chro.10227	Chain B, structure of fpt bound to ggpp	0.968	0.0632	0.0148	0.234177	6.234
Cpro.10205	hypothetical protein	Chro.10228	hypothetical protein	0.976	0.0717	0.0104	0.145049	4.6
Cpro.10206	expressed protein	Chro.10229	hypothetical protein	0.944	0.0485	0.0274	0.564948	12.0693
Cpro.10207	hypothetical protein	Chro.10230	hypothetical protein	0.972	0.0496	0.0118	0.237903	13.2111
Cpro.10209	hypothetical protein	Chro.10232	hypothetical protein	0.99	0.0713	0.006	0.0841515	1.2167
Cpro.10210	hypothetical protein	Chro.10233	hypothetical protein	0.985	0.0544	0.007	0.128676	5.2542
Cpro.10211	pyruvate kinase	Chro.10234	pyruvate kinase	0.998	0.0931	0.0009	0.00966702	9.6487
Cpro.10212	hypothetical protein	Chro.10235	hypothetical protein	0.957	0.052	0.0193	0.371154	7.9846
Cpro.10213	putative Rab2 GTPase	Chro.10236	Rab2 GTPase	0.972	0.0498	0.0116	0.232932	4.6
Cpro.10214	hypothetical protein	Chro.10237	hypothetical protein	0.98	0.0576	0.009	0.15625	14.4271
Cpro.10215	hypothetical protein	Chro.10238	hypothetical protein	0.961	0.0423	0.0185	0.437352	14.6705
Cpro.10216	hypothetical protein	Chro.10239	hypothetical protein	0.965	0.0427	0.016	0.374707	5.177
Cpro.10217	SI:bZ1P14.2 (novel protein similar to glycosyltransferases)	Chro.10240	hypothetical protein	0.968	0.0506	0.0151	0.298419	9.2994
Cpro.10218	hypothetical protein AN0576.2	Chro.10241	hypothetical protein	0.973	0.0574	0.0138	0.240418	6.8893
Cpro.10219	hypothetical protein	Chro.10243	hypothetical protein	0.957	0.0505	0.0202	0.4	9.193
Cpro.10220	glutaminyl-tRNA synthetase, putative	Chro.10244	glutaminyl-tRNA synthetase	0.992	0.0765	0.0035	0.0457516	8.3127
Cpro.10221	hypothetical protein	Chro.10245	hypothetical protein	0.911	0.0824	0.0399	0.484223	6.5391
Cpro.10222	hypothetical protein	Chro.10246	hypothetical protein	0.998	0.0584	0.001	0.0171233	4.6
Cpro.10223	hypothetical protein	Chro.10247	hypothetical protein	0.991	0.079	0.004	0.0506329	7.4764
Cpro.10224	hypothetical protein L240.08	Chro.10248	hypothetical protein	0.986	0.0395	0.006	0.151899	7.0258
Cpro.10225	vesicle transfer ATPase -related	Chro.10249	vesicle transfer ATPase -related	0.956	0.0345	0.0203	0.588406	5.76
Cpro.10226	COG0475: Kef-type K+ transport systems, membrane components	Chro.10250	potassium/proton antiporter	0.991	0.0356	0.0038	0.106742	4.6
Cpro.10227	hypothetical protein	Chro.10251	hypothetical protein	0.952	0.0486	0.0207	0.425926	6.1609
Cpro.10228	hypothetical protein	Chro.10252	hypothetical protein	0.958	0.1559	0.0179	0.114817	2.175
Cpro.10229	hypothetical protein	Chro.10253	hypothetical protein	0.972	0.0648	0.0132	0.203704	9.8329
Cpro.10230	Similar to WD40 protein Ciao1	Chro.10254	WD40 protein Ciao1	0.985	0.0919	0.0065	0.0707291	7.1001
Cpro.10231	hypothetical protein	Chro.10255	AT hook motif protein	0.956	0.0564	0.0197	0.349291	18.5553
Cpro.10232	similar to expressed protein; protein id: At1g20580.1, supported by cDNA: 27792., supported by cDNA: gi_15724291, supported by cDNA: gi_20334747	Chro.10256	aspartyl protease-like	1	0.0574	0	0	4.6
Cpro.10233	RNA polymerase subunit 8c, putative	Chro.10257	RNA polymerase subunit 8c	1	0.0491	0	0	4.6
Cpro.10234	dnaj-like protein	Chro.10258	DNAJ	0.935	0.0649	0.0287	0.442219	2.6904
Cpro.10235	hypothetical protein	Chro.10259	hypothetical protein	0.986	0.0518	0.0047	0.0907336	10.556
Cpro.10236	hypothetical protein	Chro.10260	hypothetical protein	0.959	0.0544	0.0193	0.354779	8.6422
Cpro.10237	hypothetical protein	Chro.10261	hypothetical protein	0.984	0.0607	0.0076	0.125206	9.9454
Cpro.10238	hypothetical protein	Chro.10262	hypothetical protein	0.982	0.0703	0.0073	0.103841	2.1495
Cpro.10239	hypothetical protein	Chro.10263	hypothetical protein	0.989	0.0494	0.0051	0.103239	5.1857
Cpro.10240	hypothetical protein	Chro.10264	hypothetical protein	0.95	0.0542	0.0219	0.404059	9.497
Cpro.10241	protein phosphatase 4 (formerly X), catalytic subunit; Protein phosphatase 4, catalytic subunit	Chro.10265	protein phosphatase 4 (formerly X), catalytic subunit\; Protein phosphatase 4, catalytic subunit	0.997	0.0337	0.0014	0.041543	4.6
Cpro.10242	ENSANGP00000009305	Chro.10266	ENSANGP00000009305	0.972	0.037	0.0127	0.343243	5.5061
Cpro.10243	hypothetical protein	Chro.10267	hypothetical protein	0.966	0.0741	0.016	0.215924	9.9547
Cpro.10244	hypothetical protein	Chro.10268	hypothetical protein	0.977	0.0252	0.0102	0.404762	4.6
Cpro.10245	hypothetical protein	Chro.10269	hypothetical protein	0.914	0.0835	0.0387	0.463473	6.5425
Cpro.10246	DNA repair-recombination protein	Chro.10270	RAD50 DNA repair protein -related	0.961	0.0348	0.021	0.603448	9.1381
Cpro.10247	RAD50 homolog	Chro.10271	RAD50	0.977	0.0499	0.0099	0.198397	3.206
Cpro.10248	conserved hypothetical protein	Chro.10272	hypothetical protein	0.969	0.0509	0.0135	0.265226	5.3686
Cpro.10249	unnamed protein product	Chro.10273	similar to actin related protein M1	0.99	0.0791	0.0042	0.0530973	5.0621
Cpro.10250	Caenorhabditis elegans C21ORF80, putative	Chro.10274	hypothetical protein	0.963	0.0538	0.0167	0.310409	24.0689
Cpro.10251	hypothetical protein	Chro.10275	hypothetical protein	0.983	0.0621	0.0073	0.117552	3.035
Cpro.10252	hypothetical protein	Chro.10276	hypothetical protein	0.979	0.0777	0.0093	0.119691	4.6
Cpro.10253	phosphotyrosyl phosphatase activator protein -related	Chro.10277	phosphotyrosyl phosphatase activator protein -related	0.991	0.0868	0.0042	0.0483871	7.2502
Cpro.10254	hypothetical protein	Chro.10278	hypothetical protein	0.972	0.0627	0.0115	0.183413	2.0575
Cpro.10255	Proteasome subunit beta type 1 (20S proteasome alpha subunit F) (20S proteasome subunit beta-6) gi|3608485|gb|AAC35983.1| proteasome beta subunit	Chro.10279	proteasome subunit beta type 1 (20S proteasome alpha subunit F) (20S proteasome subunit beta-6)	0.991	0.1296	0.0039	0.0300926	2.941
Cpro.10256	ENSANGP00000013416	Chro.10280	signal recognition particle 68	0.967	0.0474	0.0153	0.322785	19.7407
Cpro.10257	hypothetical protein	Chro.10281	hypothetical protein	0.986	0.0648	0.0064	0.0987654	9.6989
Cpro.10258	hypothetical protein	Chro.10282	hypothetical protein	0.953	0.1003	0.0191	0.190429	1.3111
Cpro.10259	hypothetical protein	Chro.10284	hypothetical protein	0.966	0.0649	0.0153	0.235747	8.7406
Cpro.10260	hypothetical protein	Chro.10285	hypothetical protein	0.96	0.0581	0.0185	0.318417	4.6167
Cpro.10261	hypothetical protein	Chro.10286	hypothetical protein	0.971	0.0881	0.0123	0.139614	3.8229
Cpro.10262	probable mitochondrial import receptor subunit tom40 homolog	Chro.10287	mitochondrial import receptor subunit tom40	0.984	0.0587	0.0071	0.120954	7.6143
Cpro.10263	hypothetical protein	Chro.10288	hypothetical protein	0.969	0.0537	0.0136	0.253259	7.337
Cpro.10264	hypothetical protein	Chro.10289	hypothetical protein	0.984	0.0504	0.007	0.138889	4.6
Cpro.10265	expressed protein	Chro.10290	hypothetical protein	0.984	0.0822	0.0086	0.104623	5.4607
Cpro.10266	TAF5	Chro.10291	transcription initiation factor TFIID subunit	0.973	0.0599	0.0118	0.196995	12.2627
Cpro.10268	hypothetical protein	Chro.10294	hypothetical protein	0.955	0.0593	0.0198	0.333895	5.5466
Cpro.10269	calcium antiporter, putative	Chro.10296	calcium antiporter	0.998	0.0741	0.0009	0.0121457	4.6
Cpro.10270	Pkb-activating Kinase Homologue; Pkh1p	Chro.10297	hypothetical protein	0.963	0.0318	0.0159	0.5	4.6
Cpro.10271	putative APC11 anaphase-promoting complex subunit	Chro.10298	hypothetical protein	0.969	0.0957	0.0137	0.143156	4.6
Cpro.10272	Unknown (protein for MGC:55590)	Chro.10299	hypothetical protein	0.986	0.0446	0.006	0.134529	5.3818
Cpro.10273	ENSANGP00000020842	Chro.10300	ENSANGP00000020842	1	0.0687	0	0	5.1689
Cpro.10274	hypothetical protein	Chro.10301	hypothetical protein	0.989	0.0799	0.0046	0.057572	4.6
Cpro.10275	hypothetical protein	Chro.10302	ankyrin-related protein	0.984	0.0718	0.0071	0.0988858	8.1956
Cpro.10276	s-adenosylmethionine-dependent methyltransferase, putative	Chro.10303	s-adenosylmethionine-dependent methyltransferase	0.986	0.0962	0.0062	0.0644491	2.6851
Cpro.10277	hypothetical protein ( related to snRNP protein SMX3	Chro.10304	hypothetical protein	0.985	0.042	0.0066	0.157143	4.6
Cpro.10278	methionine aminopeptidase, type I, putative	Chro.10305	methionine aminopeptidase 1 (MetAP 1) (MAP 1) (Peptidase M 1)	0.988	0.066	0.0052	0.0787879	3.5593
Cpro.10279	conjugation stage-specific protein, putative	Chro.10306	conjugation stage-specific protein	0.992	0.0518	0.0035	0.0675676	1.4181
Cpro.10280	hypothetical protein	Chro.10307	hypothetical protein	0.987	0.0462	0.0055	0.119048	14.4414
Cpro.10281	ENSANGP00000010643	Chro.10308	RNA-binding protein SiahBP	0.993	0.039	0.0029	0.074359	5.2353
Cpro.10282	centromere protein ZW10	Chro.10309	centromere protein ZW10	0.983	0.0667	0.0079	0.118441	4.2108
Cpro.10283	hypothetical protein	Chro.10310	hypothetical protein	0.974	0.0643	0.0113	0.175739	3.6887
Cpro.10284	conserved GTP-binding protein, putative	Chro.10311	GTP-binding protein	0.997	0.0508	0.0012	0.023622	18.7934
Cpro.10285	DNA-directed RNA polymerase I polypeptide 2 (RNA polymerase I subunit 2) gi|7493960|pir||T30515 DNA-directed RNA polymerase (EC 2.7.7.6) I 135K chain - Neurospora crassa gi|3668171|dbj|BAA33445.1| RNA polymerase I second-largest subunit	Chro.10312	DNA-directed RNA polymerase I polypeptide 2 (RNA polymerase I subunit 2)	0.995	0.0764	0.0024	0.0314136	10.993
Cpro.10286	hypothetical protein	Chro.10313	hypothetical protein	0.976	0.0981	0.0107	0.109072	3.0481
Cpro.10287	Hypothetical protein CBG12253	Chro.10314	hypothetical protein	0.972	0.0882	0.0122	0.138322	1.3639
Cpro.10288	OSJNBa0084K01.4	Chro.10315	OSJNBa0084K01.4	0.977	0.0454	0.0105	0.231278	4.6
Cpro.10289	hypothetical protein	Chro.10316	hypothetical protein	0.986	0.0754	0.0059	0.0782493	11.5408
Cpro.10290	syntaxin 5, putative	Chro.10317	syntaxin 5	0.994	0.073	0.0014	0.0191781	28.8374
Cpro.10291	ENSANGP00000003051	Chro.10318	ENSANGP00000003051	0.979	0.0666	0.0093	0.13964	4.513
Cpro.10292	hypothetical protein	Chro.10319	protein kinase domain	0.969	0.0861	0.0139	0.16144	11.0615
Cpro.10293	co-enzyme Q deficient; Coq5p	Chro.10320	hypothetical protein	0.986	0.0547	0.0037	0.0676417	1.4904
Cpro.10294	cg1 protein	Chro.10321	cg1 protein	0.964	0.0657	0.0168	0.255708	8.2195
Cpro.10295	probable WD-repeat membrane protein	Chro.10322	WD-repeat membrane protein	0.976	0.0554	0.0111	0.200361	15.347
Cpro.10296	hypothetical protein	Chro.10323	hypothetical protein	0.978	0.0732	0.0103	0.14071	5.7275
Cpro.10297	similar to Arabidopsis thaliana (Mouse-ear cress). Similarity to small nuclear ribonucleoprotein (Unknown protein) (Hypothetical 27.0 kDa protein)	Chro.10324	similarity to small nuclear ribonucleoprotein	0.978	0.0519	0.0089	0.171484	4.6
Cpro.10298	Golgi SNARE protein, putative	Chro.10325	Golgi SNARE protein	0.995	0.0245	0.002	0.0816327	4.6
Cpro.10299	hypothetical protein	Chro.10326	hypothetical protein	0.985	0.0648	0.0063	0.0972222	2.5293
Cpro.10300	ORF2	Chro.10327	hypothetical protein, conserved	0.973	0.0387	0.0115	0.297158	4.6
Cpro.10301	CG12259-PA	Chro.10328	CG12259-PA	0.977	0.0649	0.01	0.154083	5.1111
Cpro.10302	Protein kinase domain, putative	Chro.10329	protein kinase domain	0.993	0.0436	0.0031	0.0711009	24.4247
Cpro.10303	DNAJ-like molecular chaperone protein, putative	Chro.10330	DNAJ-like molecular chaperone protein	0.995	0.0919	0.0011	0.0119695	3.407
Cpro.10304	Unknown (protein for MGC:77351)	Chro.10331	hypothetical protein	0.983	0.0566	0.007	0.123675	4.6
Cpro.10305	hypothetical protein	Chro.10332	hypothetical protein	0.942	0.0632	0.025	0.39557	4.6218
Cpro.10306	ribosomal protein L27, putative	Chro.10333	ribosomal protein L27	0.993	0.0244	0.0032	0.131148	4.6
Cpro.10307	ER lumen protein retaining receptor-like protein, putative	Chro.10334	ER lumen protein retaining receptor-like protein	0.996	0.0653	0.0016	0.0245023	6.9773
Cpro.10308	fructose-1,6-bisphosphate aldolase	Chro.10335	fructose-1,6-bisphosphate aldolase	0.989	0.0418	0.005	0.119617	4.6
Cpro.10309	CG7609-PB	Chro.10336	MGC47001	0.987	0.054	0.0058	0.107407	6.4578
Cpro.10310	triose-phosphate isomerase	Chro.10337	triose-phosphate isomerase	0.984	0.0649	0.0072	0.11094	6.672
Cpro.10311	zinc transporter	Chro.10338	zinc transporter	0.983	0.0545	0.0075	0.137615	3.3103
Cpro.10312	peptidoglycan N-acetylglucosamine deacetylase A	Chro.10339	hypothetical protein	0.902	0.2179	0.0689	0.3162	1.9235
Cpro.10313	hypothetical protein	Chro.10340	hypothetical protein	0.925	0.0102	0.0444	4.35294	4.6
Cpro.10314	hypothetical protein	Chro.10343	hypothetical protein	0.94	0.0728	0.0206	0.282967	4.3688
Cpro.10315	19096-22891	Chro.10345	hypothetical protein	0.976	0.0454	0.0098	0.215859	5.0579
Cpro.10316	hypothetical protein	Chro.10346	hypothetical protein	0.956	0.0634	0.0165	0.260252	4.0427
Cpro.10318	hypothetical protein	Chro.10348	hypothetical protein	0.977	0.0463	0.0101	0.218143	7.4219
Cpro.10319	clp protease ATP binding subunit	Chro.10349	hypothetical protein	0.973	0.0421	0.0131	0.311164	16.3593
Cpro.10320	hypothetical protein	Chro.10350	hypothetical protein	0.983	0.0464	0.0074	0.159483	6.2759
Cpro.10321	hypothetical protein	Chro.10351	hypothetical protein	0.985	0.0594	0.0068	0.114478	4.6
Cpro.10322	1500001L15Rik protein	Chro.10352	similar to CG11030-PA	0.984	0.0346	0.0073	0.210983	9.6356
Cpro.10324	hypothetical protein	Chro.10354	hypothetical protein	0.993	0.0783	0.0028	0.0357599	2.6602
Cpro.10325	hypothetical protein	Chro.10355	hypothetical protein	0.876	0.0759	0.0431	0.567852	4.8673
Cpro.10326	hypothetical protein	Chro.10356	hypothetical protein	0.974	0.0584	0.0106	0.181507	1.5394
Cpro.10327	hypothetical protein	Chro.10357	hypothetical protein	0.969	0.0342	0.0136	0.397661	11.1846
Cpro.10328	hypothetical protein	Chro.10358	hypothetical protein	0.973	0.0884	0.0109	0.123303	3.0148
Cpro.10329	hypothetical protein	Chro.10359	hypothetical protein	0.956	0.0613	0.0164	0.267537	4.2344
Cpro.10330	hypothetical protein	Chro.10360	hypothetical protein	0.983	0.0674	0.0057	0.0845697	6.0218
Cpro.10332	erythrocyte membrane-associated antigen	Chro.10362	erythrocyte membrane-associated antigen	0.957	0.0486	0.0146	0.300412	4.4127
Cpro.10333	putative protein kinase	Chro.10363	hypothetical protein	0.865	0.1031	0.0281	0.272551	8.8128
Cpro.10334	hypothetical protein	Chro.10364	hypothetical protein	0.964	0.0344	0.0173	0.502907	7.94
Cpro.10335	hypothetical protein	Chro.10365	hypothetical protein	0.938	0.0863	0.0156	0.180765	5.3343
Cpro.10336	hypothetical protein	Chro.10366	hypothetical protein	0.945	0.0728	0.0189	0.259615	3.9285
Cpro.10340	Ylr118cp	Chro.10371	carboxylesterase	0.947	0.1145	0.0265	0.231441	8.9005
Cpro.10341	transcription/repair factor TFIIH subunit Tfb3	Chro.10372	transcription/repair factor TFIIH subunit Tfb3	0.997	0.1107	0.0013	0.0117435	14.8057
Cpro.10342	cyclin, putative	Chro.10373	hypothetical protein	0.989	0.0167	0.0044	0.263473	2.1511
Cpro.10343	ring finger protein	Chro.10374	hypothetical protein	0.968	0.0426	0.0128	0.300469	5.1779
Cpro.10344	hypothetical protein	Chro.10375	hypothetical protein	0.979	0.0766	0.0089	0.116188	9.399
Cpro.10345	predicted hydrolase	Chro.10376	ht-1080 protein	0.993	0.0534	0.0026	0.0486891	10.728
Cpro.10346	hypothetical protein	Chro.10377	hypothetical protein	0.988	0.1356	0.0045	0.0331858	1.82
Cpro.10347	hypothetical protein	Chro.10378	hypothetical protein	0.982	0.1157	0.0072	0.0622299	4.6
Cpro.10349	phosphatidylinositol-glycan-class c	Chro.10380	phosphatidylinositol-glycan-class c	0.993	0.0622	0.0031	0.0498392	4.6
Cpro.10350	putative AAA-family ATPase	Chro.10381	AAA-family ATPase	0.993	0.0555	0.0009	0.0162162	7.2065
Cpro.10351	hypothetical protein	Chro.10382	hypothetical protein	0.966	0.0806	0.0083	0.102978	2.4238
Cpro.10352	CCAAT-box DNA binding protein subunit B	Chro.10383	CCAAT-box DNA binding protein subunit B	0.971	0.0562	0.0081	0.144128	2.6152
Cpro.10353	ENSANGP00000019228	Chro.10384	ENSANGP00000019228	0.995	0.0566	0.002	0.0353357	2.2365
Cpro.10354	hypothetical protein	Chro.10385	hypothetical protein	0.979	0.0209	0.008	0.382775	4.6
Cpro.10355	hypothetical protein	Chro.10386	hypothetical protein	0.938	0.0889	0.0254	0.285714	1.2576
Cpro.10356	hypothetical protein	Chro.10387	hypothetical protein	0.986	0.1197	0.0052	0.0434419	6.5455
Cpro.10357	unknown protein, putative	Chro.10388	hypothetical protein	0.982	0.0394	0.0055	0.139594	12.525
Cpro.10358	hypothetical protein	Chro.10389	hypothetical protein	0.971	0.0595	0.0113	0.189916	6.1036
Cpro.10359	thrombospondin related adhesive protein	Chro.10390	thrombospondin related adhesive protein	0.961	0.0771	0.0148	0.191958	15.9545
Cpro.10360	TSP1 domain-containing protein TSP3 precursor	Chro.10391	TSP1 domain-containing protein TSP3 precursor	0.921	0.1079	0.0414	0.383689	4.2066
Cpro.10361	ERYTHROCYTE MEMBRANE PROTEIN PFEMP3	Chro.10392	erythrocyte membrane protein PFEMP3	0.984	0.0763	0.0066	0.0865007	4.7032
Cpro.10362	putative single stranded G-strand telomeric DNA-binding protein	Chro.10393	single stranded G-strand telomeric DNA-binding protein	1	0.0078	0	0	4.6
Cpro.10363	hypothetical protein	Chro.10394	hypothetical protein	0.969	0.0563	0.0135	0.239787	3.9407
Cpro.10364	hypothetical protein	Chro.10395	hypothetical protein	0.989	0.0414	0.0045	0.108696	4.6
Cpro.10365	hypothetical protein	Chro.10397	hypothetical protein	0.968	0.1088	0.0057	0.0523897	4.3172
Cpro.10366	hypothetical protein	Chro.10398	hypothetical protein	1	0	0	None	4.6
Cpro.10369	hypothetical protein	Chro.10401	hypothetical protein	0.957	0.2675	0.0198	0.0740187	1.1743
Cpro.10370	hypothetical protein	Chro.10402	hypothetical protein	0.917	0.1153	0.0285	0.247181	12.93
Cpro.10371	hypothetical protein	Chro.10403	hypothetical protein	0.955	0.0631	0.02	0.316957	5.0451
Cpro.10372	hypothetical protein	Chro.10404	hypothetical protein	0.985	0.0773	0.0064	0.0827943	10.5115
Cpro.10373	hypothetical protein	Chro.10406	hypothetical protein	0.954	0.1009	0.018	0.178394	7.6695
Cpro.10374	hypothetical protein	Chro.10407	hypothetical protein	0.984	0.0639	0.0069	0.107981	7.8085
Cpro.10375	hypothetical protein	Chro.10408	hypothetical protein	0.96	0.0615	0.015	0.243902	10.0097
Cpro.10377	hypothetical protein	Chro.10410	hypothetical protein	0.968	0.0878	0.0124	0.14123	29.9588
Cpro.10378	hypothetical protein	Chro.10411	hypothetical protein	0.937	0.065	0.0303	0.466154	9.6033
Cpro.10379	expressed protein	Chro.10412	hypothetical protein	0.98	0.0811	0.0083	0.102343	4.6
Cpro.10380	chromodomain-helicase-DNA-binding protein, CHD-1-related	Chro.10413	chromodomain-helicase-DNA-binding protein, CHD-1-related	0.962	0.0632	0.0103	0.162975	5.4239
Cpro.10382	notch homolog 5	Chro.10415	hypothetical protein	0.95	0.0791	0.0167	0.211125	6.5599
Cpro.10383	aspartyl (acid) protease, putative	Chro.10416	aspartyl (acid) protease	0.971	0.0769	0.0111	0.144343	4.6112
Cpro.10384	cell cycle switch protein	Chro.10417	cell cycle switch protein	0.998	0.066	0.001	0.0151515	42.3863
Cpro.10385	Acetyl-coenzyme A synthetase (Acetate--CoA ligase) (Acyl-activating enzyme) gi|886027|gb|AAC47128.1| acetyl-CoA synthetase	Chro.10418	acetyl-coenzyme a synthetase (acetate--coa ligase) (acyl-activating enzyme)	0.988	0.0748	0.0052	0.0695187	5.9659
Cpro.10386	mannosyltransferase-related	Chro.10419	mannosyltransferase-related	0.994	0.0541	0.0027	0.0499076	4.7042
Cpro.10387	glucosamine-fructose-6-phosphate aminotransferase	Chro.10420	glucosamine-fructose-6-phosphate aminotransferase	1	0.0791	0	0	2.1545
Cpro.10388	hypothetical protein AN8767.2	Chro.10421	hypothetical protein	0.984	0.0551	0.0069	0.125227	4.1336
Cpro.10389	Unknown (protein for MGC:75683)	Chro.10422	hypothetical protein	0.996	0.068	0.0017	0.025	4.6
Cpro.10390	hypothetical protein	Chro.10423	hypothetical protein	0.952	0.052	0.0185	0.355769	6.9139
Cpro.10391	hypothetical protein-signal peptide prediction	Chro.10424	hypothetical protein	0.931	0.0635	0.0323	0.508661	8.4719
Cpro.10392	hypothetical protein	Chro.10425	hypothetical protein	0.949	0.0549	0.0197	0.358834	7.6678
Cpro.10393	hypothetical protein	Chro.10426	hypothetical protein	1	0.0703	0	0	8.1897
Cpro.10394	hypothetical protein	Chro.10427	hypothetical protein	0.917	0.1335	0.0401	0.300375	6.1451
Cpro.10396	hypothetical protein	Chro.10429	hypothetical protein	0.968	0.0557	0.0144	0.258528	7.0323
Cpro.10397	hypothetical protein	Chro.10430	hypothetical protein	0.903	0.0423	0.0484	1.14421	4.6
Cpro.10398	hypothetical protein	Chro.10431	hypothetical protein	0.949	0.1194	0.024	0.201005	3.4168
Cpro.10399	hypothetical protein	Chro.10432	hypothetical protein	0.786	0.1619	0.1109	0.684991	4.9239
Cpro.10400	hypothetical protein	Chro.10433	hypothetical protein	0.904	0.1397	0.0428	0.306371	10.7578
Cpro.20002	heat shock protein	Chro.20010	heat shock protein	0.993	0.0712	0.0006	0.00842697	6.3636
Cpro.20003	molybdenum cofactor sulfurase	Chro.20011	molybdenum cofactor sulfurase	0.978	0.0935	0.0085	0.0909091	8.8244
Cpro.20004	dna-(apurinic or apyrimidinic site) lyase	Chro.20012	dna-(apurinic or apyrimidinic site) lyase	0.964	0.0593	0.0136	0.229342	6.8226
Cpro.20005	Hypothetical protein CBG09590	Chro.20013	hypothetical protein	0.994	0.0567	0.0025	0.0440917	39.966
Cpro.20006	hypothetical protein	Chro.20014	hypothetical protein	0.981	0.0514	0.0067	0.13035	6.2379
Cpro.20009	hypothetical protein	Chro.20017	hypothetical protein	0.977	0.1127	0.0088	0.0780834	6.646
Cpro.20011	DEAD box ATP-dependent RNA helicase	Chro.20019	hypothetical protein	1	0.1305	0	0	4.6
Cpro.20012	acidic ribosomal protein P2	Chro.20020	acidic ribosomal protein P2	0.991	0.0222	0.0041	0.184685	4.6
Cpro.20013	hypothetical protein	Chro.20021	hypothetical protein	0.934	0.039	0.0251	0.64359	4.958
Cpro.20014	RNA processing factor 1 (45.2 kD) (2J285)	Chro.20022	hypothetical protein	0.977	0.088	0.0097	0.110227	4.6
Cpro.20015	40S ribosomal subunit protein S24, putative	Chro.20023	40S ribosomal subunit protein S24	1	0.0196	0	0	4.6
Cpro.20016	hypothetical protein	Chro.20024	hypothetical protein	0.942	0.0552	0.0308	0.557971	4.6
Cpro.20017	hypothetical protein	Chro.20025	CGI-141 protein	0.918	0.1815	0.0478	0.263361	1.3806
Cpro.20018	hypothetical protein	Chro.20026	hypothetical protein	0.972	0.0668	0.003	0.0449102	17.8083
Cpro.20020	glycerol-3-phosphate dehydrogenase, putative	Chro.20028	glycerol-3-phosphate dehydrogenase	0.993	0.0594	0.003	0.0505051	16.8264
Cpro.20021	Gas41 homologue, putative	Chro.20029	Gas41	0.971	0.0603	0.0081	0.134328	10.6065
Cpro.20022	hypothetical protein MG04549.4	Chro.20030	hypothetical protein	0.976	0.09	0.0099	0.11	8.3171
Cpro.20023	ubiquitin-conjugating enzyme e2-17 kDa	Chro.20031	hypothetical protein	0.972	0.0884	0.0101	0.114253	4.6
Cpro.20024	vacuolar ATP synthase subunit g, putative	Chro.20032	vacuolar ATP synthase subunit g	0.992	0.0832	0.0035	0.0420673	2.9853
Cpro.20025	hypothetical protein	Chro.20033	hypothetical protein	0.968	0.0952	0.0145	0.152311	4.6
Cpro.20026	eukaryotic translation initiation factor 3 subunit 7, putative	Chro.20034	eukaryotic translation initiation factor 3 subunit 7	0.998	0.0831	0.0008	0.00962696	67.6332
Cpro.20027	60S RIBOSOMAL PROTEIN L15-2 gi|2982318|gb|AAC32144.1| probable 60S ribosomal protein L15	Chro.20035	60S ribosomal protein L15-2	1	0.0376	0	0	4.6
Cpro.20028	hypothetical protein	Chro.20036	hypothetical protein	0.956	0.0601	0.0182	0.302829	4.6
Cpro.20029	hypothetical protein	Chro.20037	hypothetical protein	1	0.0538	0	0	4.6
Cpro.20030	hypothetical protein	Chro.20038	hypothetical protein	0.976	0.048	0.0114	0.2375	8.3409
Cpro.20031	nucleoside transporter family protein	Chro.20039	CG31911-PA	0.984	0.0534	0.0064	0.11985	1.1984
Cpro.20032	notchless	Chro.20040	notchless	0.987	0.0555	0.0056	0.100901	3.3183
Cpro.20033	hypothetical protein	Chro.20041	hypothetical protein	0.953	0.0521	0.022	0.422265	14.8841
Cpro.20035	hypothetical protein	Chro.20043	hypothetical protein	0.997	0.0498	0.0012	0.0240964	6.4991
Cpro.20036	hypothetical protein	Chro.20044	hypothetical protein	0.996	0.0565	0.0015	0.0265487	4.6
Cpro.20037	COG0237: Dephospho-CoA kinase	Chro.20045	COG0237: dephospho-CoA kinase	1	0.1268	0	0	4.6
Cpro.20038	hypothetical protein	Chro.20046	hypothetical protein	0.813	0.0768	0.1003	1.30599	2.4374
Cpro.20039	hypothetical protein	Chro.20047	hypothetical protein	0.825	0.1612	0.0917	0.568859	3.8204
Cpro.20040	hypothetical protein	Chro.20048	hypothetical protein	0.829	0.09	0.0878	0.975556	6.0519
Cpro.20041	hypothetical protein	Chro.20049	hypothetical protein	0.572	0.1542	0.2372	1.53826	7.5818
Cpro.20042	hypothetical protein	Chro.20050	hypothetical protein	0.714	0.1686	0.1475	0.874852	5.8087
Cpro.20043	hypothetical protein	Chro.20051	hypothetical protein	0.778	0.0309	0.1041	3.36893	5.305
Cpro.20044	hypothetical protein	Chro.20052	hypothetical protein	0.79	0.1948	0.0982	0.504107	4.1177
Cpro.20046	hypothetical protein	Chro.20054	hypothetical protein	0.925	0.0654	0.0224	0.342508	6.8198
Cpro.20047	hypothetical protein	Chro.20055	hypothetical protein	0.933	0.0542	0.015	0.276753	14.5501
Cpro.20048	hypothetical protein	Chro.20056	hypothetical protein	0.965	0.0697	0.0086	0.123386	6.0801
Cpro.20049	hypothetical protein	Chro.20057	hypothetical protein	0.981	0.0557	0.0085	0.152603	10.7551
Cpro.20050	hypothetical protein	Chro.20058	hypothetical protein	0.984	0	0.0069	None	4.6
Cpro.20051	hypothetical protein	Chro.20059	hypothetical protein	0.967	0.0451	0.0113	0.250554	4.2507
Cpro.20052	PfMPC	Chro.20060	PfMPC	0.971	0.0513	0.0119	0.231969	4.474
Cpro.20053	putative proteasome component	Chro.20061	proteasome component	0.995	0.0737	0.002	0.027137	8.4429
Cpro.20054	hypothetical protein	Chro.20062	hypothetical protein	0.923	0.0733	0.0169	0.230559	6.4948
Cpro.20055	MPU1p	Chro.20063	MPU1p	0.996	0.0582	0.0019	0.032646	4.6
Cpro.20056	hypothetical protein	Chro.20064	hypothetical protein	0.965	0.0419	0.0141	0.336516	3.5034
Cpro.20057	OBP33pep like protein	Chro.20065	OBP33pep like protein	0.972	0.0662	0.009	0.135952	3.5849
Cpro.20058	hypothetical protein	Chro.20066	hypothetical protein	0.968	0.0811	0.0118	0.145499	4.4248
Cpro.20059	putative UDP N-acetylglucosamine transporter	Chro.20067	nucleotide-sugar transporter (2A681)	0.991	0.0532	0.004	0.075188	4.3082
Cpro.20060	t-complex protein 1, alpha subunit, putative	Chro.20068	t-complex protein 1, alpha subunit	0.996	0.0592	0.0016	0.027027	6.3703
Cpro.20061	hypothetical protein	Chro.20069	hypothetical protein	0.982	0.0411	0.0091	0.221411	23.7246
Cpro.20062	hypothetical protein	Chro.20070	hypothetical protein	0.958	0.0511	0.0102	0.199609	6.0975
Cpro.20063	hypothetical protein	Chro.20071	hypothetical protein	0.993	0.0525	0.0029	0.0552381	4.6
Cpro.20064	hypothetical protein	Chro.20073	hypothetical protein	0.956	0.0403	0.0175	0.434243	8.2827
Cpro.20065	hypothetical protein	Chro.20074	hypothetical protein	0.986	0.0476	0.0059	0.12395	11.5157
Cpro.20066	hypothetical protein	Chro.20075	hypothetical protein	0.968	0.0639	0.0145	0.226917	5.9558
Cpro.20067	similar to Dictyostelium discoideum (Slime mold). Interaptin	Chro.20077	hypothetical protein	0.935	0.0726	0.0162	0.22314	6.1639
Cpro.20069	hypothetical protein	Chro.20079	hypothetical protein	0.78	0.0835	0.0153	0.183234	11.5332
Cpro.20070	DNA mismatch repair protein, C-terminal domain, putative	Chro.20080	DNA mismatch repair protein, C-terminal domain	0.916	0.067	0.035	0.522388	6.2791
Cpro.20071	hypothetical protein	Chro.20081	hypothetical protein	0.989	0.0742	0.0045	0.0606469	5.7511
Cpro.20072	hypothetical protein	Chro.20082	hypothetical protein	1	0.0999	0	0	7.3505
Cpro.20073	hypothetical protein	Chro.20083	hypothetical protein	0.995	0.0465	0.0023	0.0494624	23.3697
Cpro.20074	cut up CG6998-PA	Chro.20085	cut up CG6998-PA	1	0.0386	0	0	4.6
Cpro.20075	Hypothetical protein CBG20696	Chro.20086	hypothetical protein	0.974	0.0547	0.012	0.219378	7.9749
Cpro.20076	SNAP protein (soluble N-ethylmaleimide-sensitive factor Attachment Protein), putative	Chro.20087	SNAP protein (soluble N-ethylmaleimide-sensitive factor Attachment Protein)	0.988	0.0366	0.0055	0.150273	5.885
Cpro.20077	hypothetical protein	Chro.20088	hypothetical protein	0.962	0.0548	0.0188	0.343066	23.7017
Cpro.20078	hypothetical protein	Chro.20089	hypothetical protein	0.995	0.0844	0.0022	0.0260664	3.0639
Cpro.20079	scavenger receptor protein TgSR1 precursor	Chro.20090	scavenger receptor protein TgSR1 precursor	0.995	0.0496	0.002	0.0403226	6.8717
Cpro.20080	hypothetical protein	Chro.20091	hypothetical protein	0.977	0.0343	0.0109	0.317784	22.2253
Cpro.20081	calmodulin	Chro.20092	calmodulin	1	0.0641	0	0	4.6
Cpro.20082	translation initiation factor SUI1	Chro.20093	translation initiation factor SUI1	1	0.0112	0	0	4.6
Cpro.20083	Hypothetical FAM18-like protein gi|28829725|gb|AAO52232.1| similar to Mus musculus (Mouse). 1810036I24Rik protein	Chro.20094	FAM18-like protein	0.991	0.0577	0.0036	0.0623917	2.495
Cpro.20084	similar to Homo sapiens (Human). NPD010	Chro.20095	NPD010	0.977	0.085	0.0097	0.114118	4.6
Cpro.20085	hypothetical protein	Chro.20096	hypothetical protein	0.997	0.0482	0.0014	0.0290456	8.9882
Cpro.20086	proteasome B type subunit	Chro.20097	proteasome B type subunit	0.99	0.0519	0.0041	0.0789981	1.9302
Cpro.20087	hypothetical protein BC013949	Chro.20098	ENSANGP00000014638	0.992	0.0587	0.0035	0.0596252	5.1076
Cpro.20088	hypothetical protein	Chro.20099	hypothetical protein	0.954	0.0507	0.0228	0.449704	6.989
Cpro.20089	hypothetical protein	Chro.20100	hypothetical protein	0.967	0.026	0.0154	0.592308	19.2765
Cpro.20090	hypothetical protein	Chro.20101	hypothetical protein	0.991	0.0499	0.0041	0.0821643	29.0281
Cpro.20091	hypothetical protein MG08547.4	Chro.20102	hypothetical protein	0.979	0.0538	0.0094	0.174721	8.016
Cpro.20092	involved in a-factor processing; Ste23p	Chro.20103	involved in a-factor processing\; Ste23p	0.978	0.0579	0.0096	0.165803	6.3869
Cpro.20093	ENSANGP00000016000	Chro.20104	ENSANGP00000016000	0.98	0.0725	0.0087	0.12	31.6473
Cpro.20094	hypothetical protein	Chro.20105	hypothetical protein	0.934	0.0811	0.0286	0.352651	4.103
Cpro.20095	hypothetical protein	Chro.20106	hypothetical protein	0.973	0.0574	0.0115	0.200348	7.5434
Cpro.20096	hypothetical protein	Chro.20107	hypothetical protein	0.97	0.0413	0.0116	0.280872	3.7877
Cpro.20097	hypothetical protein	Chro.20108	hypothetical protein	0.972	0.0824	0.0123	0.149272	3.0743
Cpro.20098	DNA-directed RNA polymerase 2, putative	Chro.20109	DNA-directed RNA polymerase 2	1	0.0447	0	0	2.7327
Cpro.20099	hypothetical protein	Chro.20110	hypothetical protein	0.978	0.0382	0.01	0.26178	4.0894
Cpro.20100	RNA recognition motif, putative	Chro.20111	RNA recognition motif	0.987	0.0344	0.0031	0.0901163	16.8639
Cpro.20101	p68-like protein.	Chro.20112	similar to RNA-dependent helicase p68 (DEAD-box protein p68) (DEAD-box protein 5)	0.995	0.0217	0.0023	0.105991	4.6
Cpro.20102	hypothetical protein	Chro.20113	hypothetical protein	0.912	0.1309	0.0383	0.29259	2.1337
Cpro.20103	26S proteasome subunit P40.5, putative	Chro.20114	26S proteasome subunit P40.5	0.986	0.0495	0.0066	0.133333	9.8691
Cpro.20104	putative mitochondrial carrier protein	Chro.20115	mitochondrial carrier protein	0.994	0.0732	0.0027	0.0368852	4.022
Cpro.20105	similar to Homo sapiens (Human). Flavohemoprotein b5+b5R (DJ676J13.1) (Flavohemoprotein b5+b5R cytochrome b-type NAD(P)H oxidoreductase)	Chro.20116	Flavohemoprotein b5+b5R (DJ676J13.1) (Flavohemoprotein b5+b5R cytochrome b-type NAD(P)H oxidoreductase)	0.99	0.063	0.0046	0.0730159	3.558
Cpro.20106	hypothetical protein	Chro.20117	hypothetical protein	0.951	0.0322	0.0234	0.726708	9.425
Cpro.20107	CDPK2	Chro.20118	CDPK2	0.985	0.0449	0.0065	0.144766	3.4156
Cpro.20108	Hypothetical protein CBG09459	Chro.20119	hypothetical protein	1	0.0669	0	0	1.4493
Cpro.20109	hypothetical protein	Chro.20120	hypothetical protein	0.957	0.0461	0.0199	0.43167	9.0453
Cpro.20110	acyl-CoA:diacylglycerol acyltransferase 1-related enzyme	Chro.20121	acyl-CoA:diacylglycerol acyltransferase 1-related enzyme	0.998	0.0381	0.0009	0.023622	17.1508
Cpro.20111	hypothetical protein T12C22.19	Chro.20122	DNA replication licensing factor MCM2	0.997	0.0561	0.0014	0.0249554	4.99
Cpro.20112	similar to Mus musculus (Mouse). Silencer-associated factor	Chro.20123	silencer-associated factor	0.972	0.0637	0.0126	0.197802	8.089
Cpro.20113	molybdopterin synthase sulphurylase	Chro.20124	ENSANGP00000008492	0.993	0.0582	0.0028	0.04811	23.4594
Cpro.20114	hypothetical protein	Chro.20125	hypothetical protein	0.96	0.0181	0.02	1.10497	7.626
Cpro.20115	syntaxin, putative	Chro.20126	syntaxin	0.994	0.0561	0.004	0.0713012	4.6
Cpro.20116	unnamed protein product	Chro.20127	hypothetical protein	0.997	0.0349	0.0013	0.0372493	4.6
Cpro.20117	Drosophila melanogaster RE21692p, putative	Chro.20128	RE21692p	0.988	0.0596	0.0046	0.0771812	3.6078
Cpro.20118	zinc finger protein-related	Chro.20129	zinc finger protein-related	0.997	0.0574	0.0014	0.0243902	12.8679
Cpro.20119	hypothetical protein	Chro.20130	zinc-finger protein zpr1	1	0.0837	0	0	4.6
Cpro.20120	CLL-associated antigen KW-2	Chro.20131	CLL-associated antigen KW-2	0.955	0.0683	0.0196	0.286969	11.503
Cpro.20121	Hypothetical protein CBG11196	Chro.20132	hypothetical protein	0.984	0.0406	0.0072	0.17734	8.018
Cpro.20122	CG33057-PA	Chro.20133	CG33057-PA	0.976	0.0492	0.0098	0.199187	7.7537
Cpro.20123	hypothetical protein	Chro.20134	hypothetical protein	0.977	0.0351	0.0101	0.287749	5.3851
Cpro.20124	hypothetical protein	Chro.20135	hypothetical protein	0.976	0.0629	0.0104	0.165342	16.1695
Cpro.20125	hypothetical protein	Chro.20136	hypothetical protein	0.974	0.031	0.0113	0.364516	3.1946
Cpro.20126	DNA replication licensing factor, putative	Chro.20137	DNA replication licensing factor	0.984	0.0527	0.0072	0.136622	18.7625
Cpro.20127	hypothetical protein	Chro.20138	hypothetical protein	0.985	0.0361	0.0066	0.182825	7.0515
Cpro.20128	adenylyl cyclase	Chro.20139	hypothetical protein	0.982	0.0403	0.0079	0.19603	9.1078
Cpro.20129	hypothetical protein	Chro.20140	hypothetical protein	0.982	0.0629	0.0074	0.117647	14.3655
Cpro.20130	hypothetical protein	Chro.20141	hypothetical protein	0.979	0.0413	0.0086	0.208232	5.5184
Cpro.20131	calcium-dependent protein kinase	Chro.20142	calcium-dependent protein kinase	0.982	0.0536	0.0083	0.154851	5.9063
Cpro.20132	hypothetical protein	Chro.20143	hypothetical protein	0.979	0.079	0.01	0.126582	4.298
Cpro.20133	hypothetical protein	Chro.20144	hypothetical protein	0.95	0.0404	0.0227	0.561881	4.6
Cpro.20134	Pfj1	Chro.20145	Pfj1	0.978	0.0228	0.0098	0.429825	4.6
Cpro.20135	hypothetical protein; hypothetical protein, conserved	Chro.20146	hypothetical protein	0.993	0.0507	0.0033	0.0650888	7.8389
Cpro.20136	26S protease subunit regulatory subunit 6a, putative	Chro.20147	26S protease subunit regulatory subunit 6a	1	0.0613	0	0	7.4058
Cpro.20137	ATP synthase beta chain, mitochondrial precursor, putative	Chro.20148	ATP synthase beta chain, mitochondrial precursor	0.988	0.0982	0.0052	0.0529532	5.6701
Cpro.20138	F0F1-type ATP synthase beta subunit	Chro.20149	ATP synthase F1 sector beta subunit	0.978	0.1077	0.0098	0.0909935	4.4244
Cpro.20139	hypothetical protein, expressed	Chro.20150	hypothetical protein	0.984	0.0562	0.0072	0.128114	19.0197
Cpro.20140	hypothetical protein	Chro.20151	hypothetical protein	0.929	0.026	0.033	1.26923	11.0265
Cpro.20141	hypothetical protein	Chro.20152	hypothetical protein	0.985	0.0483	0.0066	0.136646	3.3015
Cpro.20142	hypothetical protein	Chro.20153	hypothetical protein	0.962	0.0439	0.0168	0.382688	6.8746
Cpro.20143	CG15432-PA	Chro.20154	CG15432-PA	0.93	0.0676	0.0355	0.525148	3.1258
Cpro.20144	hypothetical protein	Chro.20155	hypothetical protein	0.996	0.0511	0.0016	0.0313112	6.5211
Cpro.20145	hypothetical protein	Chro.20156	hypothetical protein	0.947	0.0631	0.0245	0.388273	5.7649
Cpro.20146	unnamed protein product	Chro.20157	dynamin-like protein	0.957	0.0813	0.0185	0.227552	7.5831
Cpro.20147	Proteasome subunit alpha type 7 (Proteasome component DD5) gi|347511|gb|AAA33234.1| proteasome	Chro.20158	proteasome subunit alpha type 7 (Proteasome component DD5)	1	0.0495	0	0	19.1762
Cpro.20148	hypothetical protein	Chro.20159	transporter	0.986	0.0486	0.0063	0.12963	14.3949
Cpro.20149	Similar to SUMO-1 activating enzyme subunit 2	Chro.20160	SUMO-1 activating enzyme subunit 2	0.976	0.0482	0.0102	0.211618	4.545
Cpro.20150	hypothetical protein	Chro.20161	hypothetical protein	0.989	0.0659	0.0048	0.0728376	4.6
Cpro.20151	U2 snRNP auxiliary factor, putative	Chro.20162	U2 snRNP auxiliary factor	0.982	0.0346	0.0077	0.222543	5.2449
Cpro.20152	hypothetical protein	Chro.20163	hypothetical protein	0.994	0.0685	0.0027	0.0394161	8.2458
Cpro.20153	hypothetical protein	Chro.20164	hypothetical protein	0.969	0.069	0.0157	0.227536	2.106
Cpro.20154	hypothetical protein	Chro.20165	hypothetical protein	0.959	0.0365	0.0193	0.528767	12.3948
Cpro.20155	hypothetical protein	Chro.20166	hypothetical protein	0.997	0.0505	0.0015	0.029703	31.6784
Cpro.20156	CG9104-PA	Chro.20167	CG9104-PA	0.993	0.09	0.0034	0.0377778	12.4462
Cpro.20157	hypothetical protein MG00143.4	Chro.20168	hypothetical protein	0.98	0.0552	0.0084	0.152174	4.6
Cpro.20158	similar to Homo sapiens (Human). Origin recognition complex subunit 4	Chro.20169	hypothetical protein	0.992	0.0707	0.0038	0.0537482	10.75
Cpro.20159	transmembrane protein 15; cDNA sequence BC026973	Chro.20170	transmembrane protein 15\; cDNA sequence BC026973	0.992	0.0353	0.0036	0.101983	5.5574
Cpro.20160	Hbeta58/Vps26 protein homolog, putative	Chro.20171	vps26 protein	1	0.0772	0	0	4.6
Cpro.20161	fibrillin 2; syndatyly ems	Chro.20173	fibrillin 2\; syndatyly ems	0.982	0.0467	0.0081	0.173448	15.1616
Cpro.20162	probable replication licensing factor MCM3	Chro.20174	replication origin activator 2	0.986	0.0748	0.0061	0.0815508	19.2138
Cpro.20163	Protein kinase domain, putative	Chro.20175	protein kinase domain	0.994	0.0595	0.0025	0.0420168	4.252
Cpro.20164	hypothetical protein	Chro.20176	hypothetical protein	0.972	0.0583	0.0119	0.204117	4.3296
Cpro.20165	protein serine/threonine phosphatase alpha	Chro.20178	protein serine/threonine phosphatase alpha	0.972	0.0729	0.0131	0.179698	9.3475
Cpro.20166	dolichyl-di-phosphooligosaccharide-protein glycotransferase (oligosaccharyltransferase)-related	Chro.20179	dolichyl-di-phosphooligosaccharide-protein glycotransferase (oligosaccharyltransferase)-related	0.976	0.0645	0.0103	0.15969	15.4913
Cpro.20167	cyclophilin-like protein	Chro.20180	cyclophilin-like protein	0.988	0.0758	0.0051	0.0672823	4.6
Cpro.20168	hypothetical protein	Chro.20181	hypothetical protein	0.966	0.0336	0.0156	0.464286	6.2956
Cpro.20169	hypothetical protein	Chro.20182	hypothetical protein	0.952	0.0667	0.023	0.344828	7.5921
Cpro.20170	hypothetical protein	Chro.20183	hypothetical protein	1	0.0488	0	0	4.6
Cpro.20171	calmodulin	Chro.20184	calmodulin	1	0.0374	0	0	4.6
Cpro.20172	hypothetical protein	Chro.20185	hypothetical protein	0.953	0.0734	0.0212	0.288828	2.9957
Cpro.20173	hypothetical protein	Chro.20186	hypothetical protein	0.948	0.0174	0.0222	1.27586	8.099
Cpro.20174	hypothetical protein	Chro.20187	hypothetical protein	0.976	0.0515	0.0112	0.217476	23.755
Cpro.20175	hypothetical protein	Chro.20188	hypothetical protein	0.955	0.0445	0.0201	0.451685	5.1854
Cpro.20176	ERYTHROCYTE MEMBRANE PROTEIN PFEMP3	Chro.20189	erythrocyte membrane protein PFEMP3	0.964	0.0612	0.0144	0.235294	6.0927
Cpro.20177	Drosophila melanogaster LD09551p	Chro.20190	CG12099-PB	0.971	0.0609	0.0131	0.215107	13.8657
Cpro.20178	homeobox-containing protein	Chro.20191	homeobox-containing protein	0.976	0.086	0.0096	0.111628	1.3787
Cpro.20179	GDP-mannose pyrophosphorylase (4N40)	Chro.20192	GDP-mannose pyrophosphorylase (4N40)	0.974	0.0541	0.0112	0.207024	4.6
Cpro.20180	hypothetical protein	Chro.20193	hypothetical protein	0.984	0.0464	0.0084	0.181034	6.4879
Cpro.20181	hypothetical protein	Chro.20194	hypothetical protein	0.956	0.0378	0.022	0.582011	3.6041
Cpro.20182	heat shock 40 kDa protein, putative	Chro.20195	heat shock 40 kDa protein	1	0.0435	0	0	4.2512
Cpro.20183	hypothetical protein	Chro.20196	hypothetical protein	0.986	0.0232	0.0059	0.25431	4.6
Cpro.20184	CysQ protein	Chro.20197	CysQ protein	0.99	0.0427	0.0043	0.100703	4.6
Cpro.20185	probable protein kinase cot-1 (EC 2.7.1.-) - Neurospora crassa	Chro.20198	hypothetical protein	0.987	0.0834	0.0055	0.0659472	2.7049
Cpro.20186	hypothetical protein	Chro.20199	hypothetical protein	0.975	0.052	0.0101	0.194231	1.8121
Cpro.20187	hypothetical protein	Chro.20200	hypothetical protein	0.963	0.0664	0.0166	0.25	8.6436
Cpro.20188	stress-induced protein sti1-like protein	Chro.20201	stress-induced protein sti1-like protein	0.997	0.0651	0.0015	0.0230415	8.6222
Cpro.20189	hypothetical protein	Chro.20202	hypothetical protein	0.966	0.0658	0.0153	0.232523	12.5984
Cpro.20190	guanine nucleotide-binding protein, putative	Chro.20203	guanine nucleotide-binding protein	1	0.0462	0	0	4.6
Cpro.20191	protein kinase, putative	Chro.20204	protein kinase	0.983	0.0985	0.0072	0.0730964	2.7449
Cpro.20192	hypothetical protein	Chro.20205	hypothetical protein	0.953	0.1172	0.0202	0.172355	6.4102
Cpro.20193	dTDP-glucose 4-6-dehydratase-like protein	Chro.20206	dTDP-glucose 4-6-dehydratase-like protein	0.967	0.0857	0.0154	0.179697	14.7474
Cpro.20194	hypothetical protein	Chro.20207	hypothetical protein	0.974	0.045	0.0111	0.246667	9.0972
Cpro.20195	hypothetical protein	Chro.20208	hypothetical protein	0.931	0.067	0.0337	0.502985	2.7156
Cpro.20196	hypothetical protein	Chro.20210	hypothetical protein	0.982	0.052	0.0081	0.155769	9.8444
Cpro.20197	hypothetical protein	Chro.20211	hypothetical protein	0.986	0.0912	0.0066	0.0723684	4.6
Cpro.20198	hypothetical protein	Chro.20212	LD27861p	0.97	0.048	0.0139	0.289583	9.6638
Cpro.20199	mitogen-activated protein kinase 1, serine/threonine protein kinase	Chro.20213	mitogen-activated protein kinase 1, serine/threonine protein kinase	0.98	0.0807	0.0086	0.106568	3.8698
Cpro.20200	hypothetical protein	Chro.20214	hypothetical protein	0.926	0.0468	0.0152	0.324786	14.5868
Cpro.20201	hypothetical protein	Chro.20215	hypothetical protein	0.962	0.0582	0.0174	0.298969	4.923
Cpro.20202	hypothetical protein	Chro.20216	hypothetical protein	0.966	0.056	0.0166	0.296429	3.6782
Cpro.20203	hypothetical protein	Chro.20217	hypothetical protein	0.989	0.0604	0.0046	0.0761589	3.5823
Cpro.20204	hypothetical protein	Chro.20218	hypothetical protein	0.993	0.0826	0.0033	0.0399516	7.5126
Cpro.20205	hypothetical protein	Chro.20219	hypothetical protein	0.99	0.0787	0.0044	0.0559085	4.6
Cpro.20206	hypothetical protein	Chro.20220	hypothetical protein	0.984	0.0222	0.0073	0.328829	4.6
Cpro.20207	hypothetical protein	Chro.20221	hypothetical protein	0.97	0.0939	0.0141	0.15016	6.1261
Cpro.20208	proteasome A type subunit	Chro.20222	proteasome A type subunit	0.977	0.0654	0.0098	0.149847	2.9456
Cpro.20209	Drosophila melanogaster LD30622p-related	Chro.20223	hypothetical protein	0.94	0.0505	0.0257	0.508911	5.8395
Cpro.20210	translation elongation factor EF-1, subunit alpha, putative	Chro.20224	translation elongation factor EF-1, subunit alpha	0.984	0.0768	0.0075	0.0976562	20.5722
Cpro.20211	hypothetical protein	Chro.20225	hypothetical protein	0.958	0.0319	0.0181	0.567398	4.6
Cpro.20212	probable mitotic control protein dis3	Chro.20227	mitotic control protein dis3	0.975	0.0697	0.0108	0.15495	5.3411
Cpro.20213	hypothetical protein	Chro.20228	hypothetical protein	0.978	0.0385	0.0101	0.262338	7.3717
Cpro.20214	hypothetical protein	Chro.20229	hypothetical protein	0.984	0.0686	0.0069	0.100583	7.4353
Cpro.20215	high mobility group protein	Chro.20230	high mobility group protein	0.989	0	0.0048	None	4.6
Cpro.20216	hypothetical protein	Chro.20231	hypothetical protein	0.992	0.083	0.0037	0.0445783	4.1783
Cpro.20217	hypothetical protein	Chro.20232	hypothetical protein	0.983	0.0437	0.0081	0.185355	10.1572
Cpro.20218	hypothetical protein	Chro.20233	hypothetical protein	0.963	0.0655	0.0168	0.256489	5.2762
Cpro.20219	nucleolar GTPase	Chro.20234	1i973-prov protein	0.971	0.08	0.0117	0.14625	3.8756
Cpro.20220	hypothetical protein	Chro.20235	hypothetical protein	0.974	0.0536	0.0112	0.208955	4.6
Cpro.20221	DHHC1 protein; Golgi apparatus-specific protein with DHHC zinc finger domain	Chro.20236	DHHC1 protein\; Golgi apparatus-specific protein with DHHC zinc finger domain	0.98	0.0221	0.0076	0.343891	4.3797
Cpro.20222	Ribosomal protein L37e, putative	Chro.20237	ribosomal protein L37e	1	0.0989	0	0	11.8196
Cpro.20223	26S proteasome regulatory subunit (RPN7), putative	Chro.20238	hypothetical protein	0.972	0.0728	0.0119	0.163462	2.2588
Cpro.20224	hypothetical protein	Chro.20239	hypothetical protein	0.958	0.0468	0.0226	0.482906	8.8909
Cpro.20225	similar to Sestrin 1 (p53-regulated protein PA26)	Chro.20240	similar to Sestrin 1 (p53-regulated protein PA26)	0.977	0.0577	0.0106	0.183709	11.5281
Cpro.20226	hypothetical protein	Chro.20241	hypothetical protein	0.98	0.0583	0.0097	0.166381	7.2556
Cpro.20227	zuotin related factor-1	Chro.20242	zuotin related factor-1	0.95	0.0616	0.0205	0.332792	8.68
Cpro.20228	hypothetical protein	Chro.20243	hypothetical protein	0.968	0.0572	0.0143	0.25	5.0495
Cpro.20229	hypothetical protein	Chro.20244	hypothetical protein	0.971	0.0546	0.0133	0.24359	6.9177
Cpro.20230	PREG-like protein	Chro.20245	PREG-like protein	0.945	0.0388	0.0264	0.680412	23.4095
Cpro.20231	Glutamate 5-kinase (Gamma-glutamyl kinase) (GK)	Chro.20246	glutamate 5-kinase (gamma-glutamyl kinase) (GK)	0.984	0.0488	0.0069	0.141393	5.9722
Cpro.20232	Protein kinase domain, putative	Chro.20247	hypothetical protein	0.969	0.0503	0.0131	0.260437	5.7943
Cpro.20233	similar to Plasmodium berghei heat shock related protein, encoded by GenBank Accession Number L04508, and Trypanosoma cruzi heat shock protein 70, Swiss-Prot Accession Number P05456-related	Chro.20248	heat shock protein DNAJ pfj4	0.988	0.0616	0.0054	0.0876623	7.4181
Cpro.20234	hypothetical protein	Chro.20249	hypothetical protein	0.952	0.0493	0.0203	0.411765	5.5012
Cpro.20235	starch associated protein R1	Chro.20251	R1	0.97	0.0561	0.0126	0.224599	4.2117
Cpro.20236	hypothetical protein, conserved	Chro.20252	hypothetical protein	0.975	0.0507	0.0039	0.0769231	4.6
Cpro.20237	unnamed protein product	Chro.20253	hypothetical protein	0.967	0.0587	0.0145	0.247019	5.169
Cpro.20238	hypothetical protein	Chro.20254	hypothetical protein	0.91	0.0645	0.0384	0.595349	7.8754
Cpro.20239	hypothetical protein	Chro.20255	hypothetical protein	0.903	0.0356	0.0452	1.26966	10.728
Cpro.20240	hypothetical protein	Chro.20256	hypothetical protein	0.953	0.0509	0.0214	0.420432	2.1958
Cpro.20241	ATPas, class II, type 9B; ATPase, class 2, member b; ATPase 9B, p type; ATPase 9B, class II	Chro.20257	ATPas, class II, type 9B\; ATPase, class 2, member b\; ATPase 9B, p type\; ATPase 9B, class II	0.98	0.0781	0.0089	0.113956	5.5671
Cpro.20242	seroreactive antigen BMN1-9B-related	Chro.20258	hypothetical protein	0.987	0.0103	0.0055	0.533981	2.2106
Cpro.20243	Hypothetical ORF; Ydl036cp	Chro.20259	N-terminal part related to RNA:pseudouridine (psi)-synthases C-terminal portion contains the deaminase domain implicated in Riboflavin synthesis\; Rib2p	0.967	0.0553	0.0149	0.269439	11.1457
Cpro.20244	hypothetical protein	Chro.20260	hypothetical protein	0.97	0.0733	0.0131	0.178718	4.6
Cpro.20245	hypothetical protein	Chro.20261	hypothetical protein	1	0.1372	0	0	4.6
Cpro.20246	hypothetical protein	Chro.20262	hypothetical protein	0.936	0.0927	0.0291	0.313916	4.3932
Cpro.20247	methionine aminopeptidase, type II, putative	Chro.20263	methionine aminopeptidase, type II	0.994	0.0549	0.0028	0.0510018	22.3067
Cpro.20248	hypothetical protein	Chro.20264	hypothetical protein	0.942	0.0603	0.0273	0.452736	6.355
Cpro.20249	hypothetical protein	Chro.20265	hypothetical protein	0.956	0.0609	0.0203	0.333333	28.8922
Cpro.20250	glucose-methanol-choline (GMC) oxidoreductase family	Chro.20266	alcohol oxidase 2	0.98	0.0513	0.0086	0.167641	12.2219
Cpro.20251	hypothetical protein	Chro.20267	hypothetical protein	0.942	0.0605	0.0249	0.41157	6.1502
Cpro.20252	hypothetical protein	Chro.20268	hypothetical protein	0.901	0.0881	0.0484	0.549376	9.5692
Cpro.20253	hypothetical protein	Chro.20269	hypothetical protein	1	0.0857	0	0	3.2458
Cpro.20254	glutaredoxin	Chro.20270	glutaredoxin	1	0.066	0	0	4.6
Cpro.20255	hypothetical protein	Chro.20272	hypothetical protein	0.912	0.1086	0.0385	0.354512	6.2601
Cpro.20256	hypothetical protein	Chro.20273	hypothetical protein	0.721	0.2015	0.1568	0.778164	5.8962
Cpro.20257	hypothetical protein	Chro.20274	hypothetical protein	0.883	0.1482	0.0617	0.416329	9.4691
Cpro.20259	hypothetical protein	Chro.20276	hypothetical protein	0.964	0.0686	0.0156	0.227405	4.2388
Cpro.20260	hypothetical protein	Chro.20277	hypothetical protein	0.896	0.0986	0.0424	0.43002	3.7575
Cpro.20261	hypothetical protein	Chro.20278	hypothetical protein	0.98	0.0584	0.0091	0.155822	8.7736
Cpro.20262	hypothetical protein	Chro.20279	hypothetical protein	0.972	0.0748	0.0141	0.188503	7.3716
Cpro.20263	hypothetical protein	Chro.20280	hypothetical protein	0.964	0.0744	0.0166	0.223118	9.2498
Cpro.20264	hypothetical protein	Chro.20281	hypothetical protein	0.978	0.0986	0.0091	0.0922921	4.6
Cpro.20265	hypothetical protein	Chro.20282	hypothetical protein	0.942	0.034	0.0268	0.788235	10.0512
Cpro.20266	solute carrier family 35 (UDP-N-acetylglucosamine (UDP-GlcNAc) transporter), member A3; solute carrier family 35 (UDP-N-acetylglucosamine (UDP-GlcNAc) transporter), member 3	Chro.20283	solute carrier family 35 (UDP-N-acetylglucosamine (UDP-GlcNAc) transporter), member A3\; solute carrier family 35 (UDP-N-acetylglucosamine (UDP-GlcNAc) transporter), member 3	0.981	0.0811	0.0082	0.10111	4.3296
Cpro.20267	solute carrier family 35 (UDP-N-acetylglucosamine (UDP-GlcNAc) transporter), member 3	Chro.20284	solute carrier family 35 (UDP-N-acetylglucosamine (UDP-GlcNAc) transporter), member 3	0.981	0.0518	0.009	0.173745	6.6218
Cpro.20268	Hypothetical protein CBG24344	Chro.20285	hypothetical protein	0.969	0.0567	0.0151	0.266314	6.69
Cpro.20269	Hypothetical protein CBG04495	Chro.20286	hypothetical protein	0.985	0.073	0.0067	0.0917808	4.1442
Cpro.20270	similar to yeast nuclear segregation protein Bfr1 involved in Mitosis and Vesicular transport	Chro.20287	similar to yeast nuclear segregation protein Bfr1 involved in mitosis and vesicular transport	0.998	0.0985	0.0009	0.00913706	4.6
Cpro.20271	unnamed protein product	Chro.20288	hypothetical protein	0.966	0.0721	0.0166	0.230236	11.2252
Cpro.20272	hypothetical protein	Chro.20289	hypothetical protein	0.985	0.0421	0.0065	0.154394	6.4003
Cpro.20273	hypothetical protein	Chro.20290	hypothetical protein	0.972	0.0769	0.0129	0.16775	8.7906
Cpro.20274	Xenopus 14s cohesin smc1 subunit homolog	Chro.20291	Xenopus 14s cohesin smc1 subunit	0.975	0.0554	0.0118	0.212996	10.6716
Cpro.20275	hypothetical protein	Chro.20292	hypothetical protein	0.968	0.0647	0.0143	0.22102	3.7322
Cpro.20276	ENSANGP00000013875	Chro.20293	hypothetical protein	0.972	0.0636	0.0119	0.187107	6.7537
Cpro.20277	dCMP deaminase; Dcd1p	Chro.20294	dCMP deaminase\; Dcd1p	0.968	0.0576	0.0156	0.270833	8.1917
Cpro.20278	hypothetical protein	Chro.20295	hypothetical protein	0.991	0.0687	0.0037	0.0538574	2.8357
Cpro.20279	expressed protein	Chro.20296	hypothetical protein	0.961	0.0642	0.0189	0.294393	16.7849
Cpro.20280	CG12343-PA	Chro.20297	CG12343-PA	0.948	0.068	0.0225	0.330882	8.6541
Cpro.20281	ubiG	Chro.20298	Coenzyme Q3 , methyltransferase	0.954	0.0666	0.02	0.3003	4.409
Cpro.20282	hypothetical protein	Chro.20299	Chain S, Cryo-Em structure of the heavy meromyosin	0.974	0.0491	0.0113	0.230143	4.5452
Cpro.20283	hypothetical protein	Chro.20300	hypothetical protein	0.949	0.0336	0.021	0.625	9.0193
Cpro.20284	hypothetical protein	Chro.20301	hypothetical protein	0.968	0.0902	0.0117	0.129712	5.0613
Cpro.20285	Hypothetical protein CBG09206	Chro.20302	WD-40 repeat protein	0.952	0.073	0.0206	0.282192	3.1088
Cpro.20286	putative transcriptional repressor of the biotin operon birA	Chro.20303	transcriptional repressor of the biotin operon birA	0.987	0.0846	0.0054	0.0638298	0.9514
Cpro.20287	hypothetical protein	Chro.20304	hypothetical protein	0.877	0.0601	0.0618	1.02829	6.5077
Cpro.20288	WD repeat protein	Chro.20305	WD repeat protein	0.98	0.0606	0.0089	0.146865	9.3293
Cpro.20289	er lumen protein retaining receptor 1, putative	Chro.20306	er lumen protein retaining receptor 1	1	0.0516	0	0	4.6
Cpro.20290	predicted cytoskeletal protein	Chro.20307	cytoskeletal protein	0.98	0.0604	0.0092	0.152318	18.2163
Cpro.20291	hypothetical protein	Chro.20308	hypothetical protein	0.979	0.054	0.0107	0.198148	23.4249
Cpro.20292	unknown	Chro.20309	hypothetical protein	0.984	0.0386	0.0086	0.222798	4.6
Cpro.20293	phospho protein phosphatase -related	Chro.20310	phospho protein phosphatase -related	0.992	0.0569	0.0033	0.0579965	5.7156
Cpro.20294	hypothetical protein	Chro.20311	hypothetical protein	0.967	0.0643	0.0146	0.227061	5.0953
Cpro.20295	60s ribosomal protein L13	Chro.20312	60s ribosomal protein L13	0.989	0.0345	0.0052	0.150725	4.6
Cpro.20296	40S ribosomal protein S16	Chro.20313	40S ribosomal protein S16	0.993	0.0177	0.0032	0.180791	4.6
Cpro.20297	N-ethylmaleimide-sensitive factor; NSF; Sec18p	Chro.20314	N-ethylmaleimide-sensitive factor\; NSF\; Sec18p	0.986	0.0578	0.0064	0.110727	6.4132
Cpro.20298	hypothetical protein	Chro.20315	hypothetical protein	0.977	0.0776	0.0104	0.134021	6.1113
Cpro.20299	hypothetical protein	Chro.20317	hypothetical protein	0.961	0.0476	0.0173	0.363445	13.7048
Cpro.20300	hypothetical protein	Chro.20318	hypothetical protein	0.994	0.0881	0.0026	0.0295119	2.4224
Cpro.20301	hypothetical protein	Chro.20320	hypothetical protein	0.951	0.0598	0.021	0.351171	3.04
Cpro.20302	hypothetical protein	Chro.20321	hypothetical protein	0.968	0.051	0.0128	0.25098	2.0496
Cpro.20303	Similar to high mobility group box 1	Chro.20322	high mobility group box 1	1	0.0433	0	0	2.3126
Cpro.20304	TSP1 domain-containing protein TSP10 precursor	Chro.20323	TSP1 domain-containing protein TSP10 precursor	0.972	0.0601	0.0124	0.206323	3.4921
Cpro.20305	hypothetical protein	Chro.20324	hypothetical protein	0.933	0.0609	0.0335	0.550082	12.2181
Cpro.20306	hypothetical protein	Chro.20325	hypothetical protein	0.978	0.0504	0.0126	0.25	7.5524
Cpro.20307	hypothetical protein	Chro.20326	hypothetical protein	0.934	0.0908	0.0284	0.312775	9.5044
Cpro.20308	hypothetical protein	Chro.20327	hypothetical protein	0.936	0.0976	0.0271	0.277664	5.0166
Cpro.20310	hypothetical protein	Chro.20329	hypothetical protein	0.857	0.1967	0.0572	0.290798	2.3095
Cpro.20311	hypothetical protein - Arabidopsis thaliana gi|2244899|emb|CAB10321.1| UFD1 like protein	Chro.20330	hypothetical protein	0.968	0.0346	0.0126	0.364162	15.474
Cpro.20312	hypothetical protein	Chro.20331	hypothetical protein	0.971	0.0568	0.0117	0.205986	4.6
Cpro.20313	hypothetical protein B11B22.30	Chro.20332	hypothetical protein	0.978	0.0637	0.0094	0.147567	6.5968
Cpro.20314	replication factor C subunit 5, putative	Chro.20333	replication factor C subunit 5	0.995	0.0748	0.0021	0.0280749	4.6
Cpro.20315	replication factor C - like	Chro.20334	LD06837p	0.986	0.0398	0.006	0.150754	4.6
Cpro.20316	protein kinase (EC 2.7.1.-) p46XlEg22 - African clawed frog gi|609280|emb|CAA78914.1| p46XlEg22	Chro.20335	protein kinase (EC 2.7.1.-) p46XlEg22	0.997	0.0718	0.0012	0.0167131	1.5495
Cpro.20317	glucose-6-phosphate isomerase	Chro.20336	glucose-6-phosphate isomerase	0.989	0.109	0.0045	0.0412844	4.4095
Cpro.20318	hypothetical protein	Chro.20337	hypothetical protein	0.97	0.0409	0.0168	0.410758	8.614
Cpro.20319	Unknown (protein for MGC:55673)	Chro.20338	alphaSNBP(A)	0.989	0.0661	0.0044	0.0665658	5.7568
Cpro.20320	heat shock protein DnaJ homologue Pfj2	Chro.20339	heat shock protein DnaJ Pfj2	0.987	0.0561	0.0036	0.0641711	2.7077
Cpro.20321	ARF GAP-like zinc finger-containing protein (ZIGA2)	Chro.20341	beta 7 subunit of 20S proteasome	0.986	0.05	0.0065	0.13	8.2809
Cpro.20322	unnamed protein product	Chro.20342	hypothetical protein	0.979	0.0583	0.009	0.154374	8.9663
Cpro.20323	phosphoglucomutase -related	Chro.20343	hypothetical protein	0.977	0.1311	0.01	0.0762777	20.9899
Cpro.20325	hypothetical protein	Chro.20345	hypothetical protein	0.932	0.1031	0.0249	0.241513	4.5904
Cpro.20326	Unknown (protein for IMAGE:5604109)	Chro.20346	hypothetical protein	0.948	0.075	0.0175	0.233333	5.2234
Cpro.20327	hypothetical protein	Chro.20347	hypothetical protein	0.959	0.0433	0.0166	0.383372	4.7848
Cpro.20328	Homo sapiens P3ECSL-related	Chro.20348	P3ECSL-related	0.958	0.0677	0.0141	0.208272	16.3644
Cpro.20329	putative HSP protein	Chro.20349	HSP protein	0.983	0.0639	0.0074	0.115806	5.8605
Cpro.20330	PABP1-dependent poly A-specific ribonuclease subunit PAN3; PABP-dependent poly(A) nuclease 3	Chro.20350	PABP1-dependent poly A-specific ribonuclease subunit PAN3\; PABP-dependent poly(A) nuclease 3	0.97	0.0688	0.0079	0.114826	7.0388
Cpro.20331	hypothetical protein	Chro.20351	hypothetical protein	0.997	0.1053	0.0014	0.0132953	1.4853
Cpro.20332	involved intracellular protein transport, coiled-coil protein necessary for protein transport from ER to Golgi; Uso1p	Chro.20353	hypothetical protein	0.961	0.0637	0.0177	0.277865	3.8021
Cpro.20334	RIKEN cDNA 2810485I05	Chro.20355	RIKEN cDNA 2810485I05	0.983	0.0448	0.0078	0.174107	5.8326
Cpro.20335	hypothetical protein	Chro.20356	hypothetical protein	0.976	0.0325	0.0101	0.310769	2.1804
Cpro.20336	dynamin protein, putative	Chro.20357	dynamin-related protein	0.972	0.0691	0.0133	0.192475	4.5719
Cpro.20338	hypothetical protein	Chro.20360	hypothetical protein	1	0.0436	0	0	4.6
Cpro.20339	Pdcd2-prov protein	Chro.20361	Pdcd2-prov protein	0.983	0.056	0.008	0.142857	4.6
Cpro.20340	programmed cell death 2	Chro.20362	programmed cell death 2	0.972	0.0415	0.0129	0.310843	11.6416
Cpro.20341	Mystery 45A CG8070-PA	Chro.20363	severe depolymerization of actin\; Sda1p	0.966	0.1052	0.0161	0.153042	4.6733
Cpro.20342	telomerase reverse transcriptase	Chro.20365	telomerase reverse transcriptase	0.972	0.0401	0.0112	0.279302	16.3732
Cpro.20343	ubiquitin specific protease 66	Chro.20366	ubiquitin specific protease 66	0.992	0.0577	0.0034	0.0589255	4.6
Cpro.20344	hypothetical protein	Chro.20367	hypothetical protein	0.961	0.0699	0.0184	0.263233	6.1311
Cpro.20345	hypothetical protein	Chro.20368	hypothetical protein	0.963	0.0333	0.0162	0.486486	10.4603
Cpro.20346	hypothetical protein	Chro.20369	hypothetical protein	0.973	0.0405	0.0129	0.318519	5.5508
Cpro.20347	hypothetical protein	Chro.20370	hypothetical protein	0.954	0.0763	0.0136	0.178244	10.0668
Cpro.20348	hypothetical protein	Chro.20371	hypothetical protein	0.963	0.0573	0.0136	0.237347	4.6549
Cpro.20349	spliceosome associated protein - like	Chro.20372	spliceosome associated protein - like	0.962	0.078	0.0091	0.116667	16.0773
Cpro.20350	hypothetical protein	Chro.20373	hypothetical protein	0.832	0.1591	0.0781	0.490886	8.3753
Cpro.20352	hypothetical protein	Chro.20375	hypothetical protein	0.787	0.0921	0.0478	0.519001	7.8832
Cpro.20353	hypothetical protein	Chro.20376	hypothetical protein	0.966	0.0734	0.013	0.177112	20.0491
Cpro.20354	hypothetical protein	Chro.20379	hypothetical protein	0.953	0.0609	0.0082	0.134647	1.285
Cpro.20356	Uncharacterized protein family UPF0034, putative	Chro.20381	uncharacterized protein family UPF0034	0.949	0.0688	0.0122	0.177326	2.5076
Cpro.20357	hypothetical protein	Chro.20382	hypothetical protein	0.957	0.0739	0.0159	0.215156	4.1558
Cpro.20358	hypothetical protein	Chro.20383	hypothetical protein	0.949	0.0925	0.0174	0.188108	5.782
Cpro.20359	hypothetical protein	Chro.20385	hypothetical protein	0.967	0.0419	0.0128	0.305489	8.6759
Cpro.20360	hypothetical protein F10M10.50 - Arabidopsis thaliana gi|4455173|emb|CAB36705.1| putative protein	Chro.20386	hypothetical protein	0.978	0.0816	0.0076	0.0931373	7.4506
Cpro.20361	hypothetical protein	Chro.20387	hypothetical protein	0.963	0.1072	0.0154	0.143657	1.9596
Cpro.20362	hypothetical protein	Chro.20388	hypothetical protein	0.939	0.0554	0.0284	0.512635	6.9956
Cpro.20363	ABC transporter	Chro.20389	ABC transporter	0.986	0.0524	0.0066	0.125954	6.2536
Cpro.20364	hypothetical protein	Chro.20390	hypothetical protein	0.966	0.055	0.0134	0.243636	3.7578
Cpro.20365	hypothetical protein	Chro.20392	hypothetical protein	0.973	0.0414	0.0103	0.248792	6.9851
Cpro.20366	Eukaryotic Ribosome Biogenesis; Erb1p	Chro.20393	eukaryotic ribosome biogenesis\; Erb1p	0.983	0.0689	0.0074	0.107402	14.2339
Cpro.20367	hypothetical protein	Chro.20394	hypothetical protein	0.946	0.0715	0.0212	0.296503	7.1666
Cpro.20368	Brg1p	Chro.20395	SNF2 domain/helicase domain-containing protein	0.966	0.0746	0.0174	0.233244	3.8914
Cpro.20369	hypothetical protein	Chro.20396	hypothetical protein	0.992	0.0566	0.0033	0.0583039	11.8166
Cpro.20370	hypothetical protein	Chro.20397	hypothetical protein	0.969	0.1105	0.0152	0.137557	5.4377
Cpro.20371	hypothetical protein	Chro.20398	hypothetical protein	0.97	0.0534	0.0137	0.256554	5.4481
Cpro.20372	hypothetical protein	Chro.20399	hypothetical protein	0.961	0.1184	0.0156	0.131757	3.117
Cpro.20373	hypothetical protein	Chro.20400	hypothetical protein	0.93	0.1214	0.0285	0.234761	5.7063
Cpro.20374	expressed protein	Chro.20401	hypothetical protein	0.98	0.1021	0.0085	0.0832517	4.0486
Cpro.20375	hypothetical protein	Chro.20402	hypothetical protein	0.976	0.0541	0.0104	0.192237	14.3248
Cpro.20376	hypothetical protein	Chro.20403	hypothetical protein	0.94	0.1554	0.0233	0.149936	3.2045
Cpro.20377	PC20A	Chro.20404	PC20A	0.942	0.1166	0.0306	0.262436	8.0976
Cpro.20379	hypothetical protein	Chro.20406	hypothetical protein	0.93	0.0663	0.0231	0.348416	7.8103
Cpro.20380	hypothetical protein	Chro.20407	hypothetical protein	0.979	0.092	0.0097	0.105435	3.1627
Cpro.20381	hypothetical protein	Chro.20409	hypothetical protein	0.976	0.0158	0.0097	0.613924	4.6
Cpro.20383	hypothetical protein	Chro.20411	RNA recognition motif	0.935	0.0661	0.0153	0.231467	7.109
Cpro.20384	zinc finger protein, putative	Chro.20412	zinc finger protein	0.99	0.0766	0.0038	0.0496084	4.6
Cpro.20386	hypothetical protein	Chro.20414	hypothetical protein	0.988	0	0.0045	None	4.6
Cpro.20387	ENSANGP00000018666	Chro.20415	hypothetical protein	0.97	0.0188	0.0112	0.595745	9.0075
Cpro.20388	hypothetical protein	Chro.20417	hypothetical protein	0.969	0.1127	0.0108	0.0958296	3.2401
Cpro.20389	hypothetical protein	Chro.20418	hypothetical protein	1	0.0321	0	0	4.6
Cpro.20390	Plasmodium falciparum asparagine-rich protein	Chro.20419	asparagine-rich protein	0.94	0.1256	0.02	0.159236	4.8997
Cpro.20391	deoxyhypusine synthase	Chro.20420	deoxyhypusine synthase	0.982	0.0834	0.0083	0.0995204	4.6
Cpro.20392	hypothetical protein	Chro.20421	hypothetical protein	0.984	0.0312	0.0066	0.211538	2.0399
Cpro.20393	hypothetical protein	Chro.20422	hypothetical protein	0.978	0.1726	0.0088	0.0509849	4.6
Cpro.20394	elongation factor 1 (EF-1); putative	Chro.20423	elongation factor 1 (EF-1)\;	0.993	0.0498	0	0	4.6
Cpro.20395	vacuolar ATP synthase subunit h, putative	Chro.20424	vacuolar ATP synthase subunit h	0.994	0.0567	0.0009	0.015873	4.6
Cpro.20397	MYB-related transcription factor (CCA1)	Chro.20426	MYB-related transcription factor (CCA1)	0.968	0.0647	0.0119	0.183926	4.5565
Cpro.20398	calumenin	Chro.20427	membrane-associated calcum-binding protein	0.984	0.0708	0.0068	0.0960452	8.2375
Cpro.20399	ATPase involved in DNA repair	Chro.20428	hypothetical protein	0.993	0.0756	0.0028	0.037037	4.6
Cpro.20400	hypothetical protein	Chro.20429	hypothetical protein	0.898	0.0619	0.0408	0.659128	15.6716
Cpro.20401	hypothetical protein	Chro.20430	hypothetical protein	0.966	0.0661	0.0132	0.199697	5.1363
Cpro.20402	hypothetical protein F11P17.13	Chro.20431	hypothetical protein	0.966	0.0773	0.0076	0.0983182	44.2359
Cpro.20403	hypothetical protein MG05933.4	Chro.20432	hypothetical protein	0.981	0.0449	0.0081	0.180401	12.0175
Cpro.20404	hypothetical protein	Chro.20433	hypothetical protein	0.892	0.151	0.0601	0.398013	1.046
Cpro.20405	hypothetical protein	Chro.20434	hypothetical protein	0.972	0.1001	0.0118	0.117882	3.1584
Cpro.20406	replication protein A2; CpRPA2	Chro.20435	replication protein A2\; CpRPA2	0.992	0.0292	0.0036	0.123288	15.9878
Cpro.20407	putative GTP-binding protein	Chro.20436	GTP-binding protein	0.982	0.059	0.0063	0.10678	12.2346
Cpro.20408	hypothetical protein	Chro.20437	hypothetical protein	1	0	0	None	4.6
Cpro.20409	hypothetical protein	Chro.20438	hypothetical protein	0.987	0	0.0055	None	4.6
Cpro.20410	hypothetical protein	Chro.20439	hypothetical protein	0.989	0.0134	0.0051	0.380597	4.6
Cpro.20411	hypothetical protein	Chro.20440	similar to odorant receptor	0.965	0.0513	0.0157	0.306043	5.3412
Cpro.20412	hypothetical protein	Chro.20441	20k cyclophilin	1	0.0388	0	0	3.4842
Cpro.20413	hypothetical protein PH0283	Chro.20442	ORF 73, contains large complex repeat CR 73	0.965	0.0455	0.0153	0.336264	2.6119
Cpro.20414	mitochondrial import inner membrane translocase subunit tim17	Chro.20443	mitochondrial import inner membrane translocase subunit tim17	0.975	0.0378	0.0106	0.280423	5.4308
Cpro.20415	hypothetical protein	Chro.20444	hypothetical protein	1	0.0274	0	0	15.4602
Cpro.20416	hemolysin	Chro.20445	hemolysin	0.987	0.0537	0.0053	0.0986965	3.9948
Cpro.20417	hypothetical protein	Chro.20446	hypothetical protein	0.958	0.0354	0.0188	0.531073	5.9174
Cpro.20418	hypothetical protein	Chro.20447	hypothetical protein	1	0.0279	0	0	4.6
Cpro.20419	DNA helicase HEL308	Chro.20448	DNA helicase HEL308	0.972	0.0497	0.0124	0.249497	12.505
Cpro.20421	unnamed protein product	Chro.20450	hypothetical protein	0.973	0.0564	0.0118	0.20922	7.8407
Cpro.20422	hypothetical protein	Chro.20451	CTCL tumor antigen se2-1	0.973	0.0962	0.0086	0.0893971	2.4632
Cpro.20423	hypothetical protein	Chro.20452	hypothetical protein	0.953	0.0553	0.0212	0.383363	4.7473
Cpro.20425	hypothetical protein	Chro.20455	hypothetical protein	0.966	0.1023	0.015	0.146628	4.6
Cpro.20426	hypothetical protein	Chro.20456	hypothetical protein	0.986	0.0502	0.0063	0.125498	10.2092
Cpro.20427	hypothetical protein	Chro.20457	hypothetical protein	0.973	0.0728	0.0121	0.166209	11.0026
Cpro.20428	Ribosomal protein S6e, putative	Chro.20458	ribosomal protein S6e	1	0.0283	0	0	4.6
Cpro.20429	hypothetical protein	Chro.20459	hypothetical protein	0.976	0.0439	0.0109	0.248292	14.0439
Cpro.20430	hypothetical protein	Chro.20460	hypothetical protein	0.996	0.0568	0.0019	0.0334507	12.0627
Cpro.20431	hypothetical protein	Chro.20461	hypothetical protein	0.971	0.0754	0.0123	0.16313	11.1545
Cpro.20432	Unknown protein	Chro.20462	hypothetical protein	0.981	0.066	0.0082	0.124242	4.2528
Cpro.20433	hypothetical protein	Chro.20463	hypothetical protein	0.932	0.0325	0.0317	0.975385	8.6798
Cpro.20434	putative thioredoxin reductase	Chro.20464	thioredoxin reductase	0.996	0.0778	0.0017	0.0218509	5.7899
Cpro.20435	mitogen-activated protein kinase 2	Chro.20465	mitogen-activated protein kinase 2	0.984	0.0465	0.0053	0.113978	7.6668
Cpro.20436	CG11212-PA	Chro.20466	F55F8.1	0.979	0.0934	0.0088	0.0942184	4.03
Cpro.20437	hypothetical protein	Chro.20467	hypothetical protein	0.931	0.0875	0.0351	0.401143	3.0897
Cpro.20438	hypothetical protein	Chro.20468	hypothetical protein	0.78	0.0963	0.1171	1.21599	5.5407
Cpro.30001	hypothetical protein	Chro.30010	hypothetical protein	0.833	0.1547	0.0805	0.520362	5.3113
Cpro.30002	hypothetical protein	Chro.30011	hypothetical protein	0.963	0.0923	0.0166	0.179848	3.3475
Cpro.30003	hypothetical protein	Chro.30012	hypothetical protein	0.952	0.0723	0.022	0.304288	4.2646
Cpro.30004	putative casein kinase I	Chro.30013	casein kinase I	0.988	0.0699	0.0054	0.0772532	26.6331
Cpro.30005	ZW18 protein	Chro.30014	ZW18 protein	0.979	0.0716	0.0088	0.122905	11.7966
Cpro.30006	hypothetical protein	Chro.30015	hypothetical protein	0.96	0.0241	0.0189	0.784232	14.1316
Cpro.30007	hypothetical protein	Chro.30016	hypothetical protein	0.977	0.0907	0.0101	0.111356	4.6
Cpro.30008	adenosylhomocysteinase	Chro.30017	adenosylhomocysteinase	0.992	0.0667	0.0034	0.0509745	6.2057
Cpro.30009	hypothetical protein	Chro.30018	erythrocyte membrane-associated antigen	0.973	0.0451	0.0118	0.261641	15.7246
Cpro.30010	hypothetical protein	Chro.30019	hypothetical protein	0.932	0.0378	0.0311	0.822751	7.9529
Cpro.30011	HCV NS3-transactivated protein 1	Chro.30020	asparagine synthase	0.976	0.0516	0.013	0.251938	18.5666
Cpro.30012	hypothetical protein	Chro.30021	hypothetical protein	0.987	0.0448	0.0058	0.129464	3.6135
Cpro.30013	developmentally regulated GTP-binding protein 2	Chro.30022	developmentally regulated GTP-binding protein 2	0.995	0.0582	0.0025	0.0429553	18.245
Cpro.30014	ENSANGP00000010707	Chro.30023	hypothetical protein	0.948	0.0314	0.0264	0.840764	4.4962
Cpro.30015	hypothetical protein	Chro.30024	hypothetical protein	0.99	0.0531	0.0046	0.086629	13.8719
Cpro.30016	hypothetical protein	Chro.30025	hypothetical protein	0.986	0.0826	0.0061	0.0738499	10.4468
Cpro.30017	hypothetical protein MG06938.4	Chro.30026	hypothetical protein	0.966	0.0313	0.0144	0.460064	4.6
Cpro.30018	hypothetical protein	Chro.30027	hypothetical protein	0.988	0.0514	0.0052	0.101167	7.0458
Cpro.30019	hypothetical protein	Chro.30028	hypothetical protein	1	0.0789	0	0	4.6
Cpro.30020	Ci-META1	Chro.30029	latent transforming growth factor beta binding protein like (3F865)	0.986	0.0843	0.0058	0.0688019	3.9175
Cpro.30021	hypothetical protein	Chro.30030	hypothetical protein	0.964	0	0.0123	None	6.4655
Cpro.30022	hypothetical protein	Chro.30031	hypothetical protein	1	0.044	0	0	4.6
Cpro.30023	hypothetical protein	Chro.30032	hypothetical protein	0.971	0.0655	0.0117	0.178626	14.1432
Cpro.30024	hypothetical protein	Chro.30033	hypothetical protein	1	0.0485	0	0	4.6
Cpro.30025	hypothetical protein	Chro.30034	hypothetical protein	0.976	0.0654	0.0128	0.195719	5.2856
Cpro.30026	hypothetical protein	Chro.30037	hypothetical protein	0.959	0.0602	0.0182	0.302326	16.4902
Cpro.30027	protein serine/threonine phosphatase	Chro.30038	protein serine/threonine phosphatase alpha	0.991	0.0655	0.0028	0.0427481	5.0075
Cpro.30028	hypothetical protein	Chro.30039	hypothetical protein	0.986	0.086	0.0062	0.072093	3.2337
Cpro.30029	hypothetical protein	Chro.30041	hypothetical protein	0.956	0.1601	0.0167	0.10431	9.9903
Cpro.30030	putative DEAD/DEAH box helicase	Chro.30042	DEAD/DEAH box helicase	0.948	0.1046	0.0077	0.0736138	2.9788
Cpro.30031	hypothetical protein	Chro.30043	hypothetical protein	0.922	0.0687	0.0113	0.164483	2.0405
Cpro.30032	hypothetical protein	Chro.30045	hypothetical protein	0.969	0.0576	0.0127	0.220486	4.8143
Cpro.30033	hect domain and RLD 2	Chro.30046	hect domain and RLD 2	0.991	0.0546	0.0037	0.0677656	12.1123
Cpro.30034	Homo sapiens N-myristoyltransferase 2	Chro.30047	N-myristoyltransferase	0.981	0.0818	0.0091	0.111247	3.2638
Cpro.30035	scully CG7113-PA	Chro.30048	scully CG7113-PA	0.993	0.0792	0.003	0.0378788	4.6
Cpro.30036	hypothetical protein	Chro.30049	hypothetical protein	0.984	0.0466	0.0075	0.160944	4.6
Cpro.30037	hypothetical protein	Chro.30050	hypothetical protein	0.986	0.0545	0.0059	0.108257	4.6
Cpro.30038	hypothetical protein	Chro.30052	hypothetical protein	0.993	0.0494	0.0031	0.062753	4.6
Cpro.30039	hypothetical protein	Chro.30053	hypothetical protein	0.93	0.0607	0.0395	0.650741	15.3387
Cpro.30041	similar to Homo sapiens (Human). Dentin sialophosphoprotein precursor	Chro.30055	hypothetical protein	0.943	0.0767	0.0245	0.319426	8.2755
Cpro.30042	DNA helicase (recQl3)	Chro.30056	DNA helicase (recQl3)	0.985	0.05	0.0072	0.144	6.0138
Cpro.30043	hypothetical protein	Chro.30057	hypothetical protein	0.963	0.0561	0.0179	0.319073	8.1635
Cpro.30044	hypothetical protein	Chro.30058	ATP-binding cassette protein 2	0.974	0.0578	0.0109	0.188581	7.6012
Cpro.30045	hypothetical protein	Chro.30059	hypothetical protein	0.975	0.0394	0.0112	0.284264	12.8007
Cpro.30046	hypothetical protein AN5579.2	Chro.30060	vacuolar protein sorting-associated protein	0.973	0.0526	0.0116	0.220532	11.0634
Cpro.30047	hypothetical protein	Chro.30061	hypothetical protein	0.967	0.0886	0.0121	0.136569	3.5914
Cpro.30048	hypothetical protein	Chro.30062	hypothetical protein	0.994	0.0559	0.0027	0.0483005	4.6
Cpro.30049	glutathione peroxidase	Chro.30063	glutathione peroxidase	0.995	0.1126	0.0023	0.0204263	7.8585
Cpro.30050	Transmembrane amino acid transporter protein, putative	Chro.30064	transmembrane amino acid transporter protein,	0.987	0.0722	0.0062	0.0858726	7.0565
Cpro.30051	hypothetical protein	Chro.30065	hypothetical protein	0.973	0.0957	0.0117	0.122257	2.4441
Cpro.30052	hypothetical protein	Chro.30069	GDP-fucose transporter 1\; multispan transmembrane protein fuct1	0.995	0.0412	0.0021	0.0509709	4.6
Cpro.30056	hypothetical protein	Chro.30070	hypothetical protein	0.984	0.0905	0.007	0.0773481	5.5605
Cpro.30057	hypothetical protein	Chro.30071	hypothetical protein	0.954	0.0603	0.0172	0.28524	7.4722
Cpro.30058	hypothetical protein	Chro.30072	hypothetical protein	0.996	0.0742	0.0017	0.0229111	1.6982
Cpro.30059	hypothetical protein	Chro.30073	hypothetical protein	0.978	0.096	0.0108	0.1125	9.3153
Cpro.30060	hypothetical protein	Chro.30074	hypothetical protein	0.985	0.0496	0.0064	0.129032	5.8459
Cpro.30061	hypothetical protein	Chro.30075	hypothetical protein	0.964	0.0173	0.0185	1.06936	7.6644
Cpro.30062	hypothetical protein	Chro.30076	hypothetical protein	0.967	0.052	0.0145	0.278846	4.0628
Cpro.30063	hypothetical protein	Chro.30077	hypothetical protein	0.984	0.0557	0.0073	0.131059	26.265
Cpro.30064	hypothetical protein	Chro.30078	hypothetical protein	0.99	0.0675	0.0045	0.0666667	7.7393
Cpro.30065	hypothetical protein	Chro.30079	hypothetical protein	0.992	0.0929	0.0023	0.0247578	50.0331
Cpro.30066	hypothetical protein	Chro.30080	hypothetical protein	0.881	0	0.0084	None	4.6
Cpro.30067	hypothetical protein	Chro.30081	hypothetical protein	0.934	0.0687	0.0244	0.355167	8.9489
Cpro.30069	hypothetical protein	Chro.30082	hypothetical protein, conserved	0.9	0.0641	0.0304	0.474259	4.6
Cpro.30070	putative acyl-CoA synthetase	Chro.30084	acyl-CoA synthetase	0.991	0.0731	0.0034	0.0465116	8.7758
Cpro.30071	hypothetical protein	Chro.30086	hypothetical protein	0.967	0.0781	0.015	0.192061	4.3342
Cpro.30072	hypothetical protein	Chro.30087	hypothetical protein	0.963	0.0536	0.0162	0.302239	21.559
Cpro.30073	hypothetical protein	Chro.30088	hypothetical protein	0.991	0.0427	0.0037	0.0866511	4.6
Cpro.30075	hypothetical protein	Chro.30090	hypothetical protein	0.991	0.0564	0.0043	0.0762411	8.745
Cpro.30076	hypothetical protein	Chro.30091	hypothetical protein	0.811	0.1817	0.0446	0.24546	1.8347
Cpro.30079	hypothetical protein	Chro.30095	hypothetical protein	0.742	0.2725	0.2034	0.746422	2.5356
Cpro.30080	hypothetical protein	Chro.30096	hypothetical protein	0.981	0.0739	0.0087	0.117727	6.6853
Cpro.30081	RIKEN cDNA 1110065L07	Chro.30101	RIKEN cDNA 1110065L07	0.962	0.0699	0.0184	0.263233	12.4789
Cpro.30082	hypothetical protein	Chro.30102	hypothetical protein	0.989	0.0497	0.0049	0.0985915	4.4086
Cpro.30083	hypothetical protein	Chro.30103	hypothetical protein	0.974	0.0574	0.0102	0.1777	0.5837
Cpro.30084	hypothetical protein	Chro.30104	hypothetical protein	0.99	0.0544	0.0047	0.0863971	4.6
Cpro.30085	Nucleolar protein, possibly involved in ribosomal RNA pseudouridinylation, in association with snRNAs	Chro.30105	nucleolar protein, possibly involved in ribosomal RNA pseudouridinylation, in association with snRNAs	1	0.0344	0	0	4.6
Cpro.30086	hypothetical protein	Chro.30106	hypothetical protein	0.969	0.0488	0.0141	0.288934	14.7912
Cpro.30087	hypothetical protein, conserved	Chro.30107	hypothetical protein	0.954	0.1853	0.0236	0.127361	0.7072
Cpro.30088	hypothetical protein	Chro.30108	hypothetical protein	0.971	0.0657	0.0135	0.205479	4.4297
Cpro.30089	POP4 (processing of precursor , S. cerevisiae) homolog	Chro.30109	POP4 (processing of precursor , S. cerevisiae)	0.937	0.0514	0.0298	0.579767	13.9731
Cpro.30090	hypothetical protein	Chro.30110	hypothetical protein	0.953	0.0643	0.0197	0.306376	11.0304
Cpro.30091	hypothetical protein	Chro.30111	hypothetical protein	0.887	0.0654	0.0517	0.79052	4.0328
Cpro.30092	60S ribosomal protein L35 (RPL35C)	Chro.30112	60S ribosomal protein L35 (RPL35C)	1	0.0269	0	0	4.6
Cpro.30093	SWI/SNF-related matrix-associated actin-dependent regulator of chromatin d3; Rsc6p; mammalian chromatin remodeling complex BRG1-associated factor 60C; Swp73-like protein; chromatin remodeling complex BAF60C subunit; SWI/SNF complex 60 kDa subunit C	Chro.30113	SWI/SNF-related matrix-associated actin-dependent regulator of chromatin d3\; Rsc6p	0.989	0.0659	0.0058	0.0880121	3.9768
Cpro.30094	hypothetical protein	Chro.30114	hypothetical protein	0.984	0.0835	0.0072	0.0862275	4.6
Cpro.30095	ADP ribosylation factor 1	Chro.30115	ADP ribosylation factor 1	0.995	0.0392	0.0024	0.0612245	4.6
Cpro.30096	Flavoprotein, putative	Chro.30116	flavoprotein	1	0.0683	0	0	4.6
Cpro.30097	hypothetical protein	Chro.30117	hypothetical protein	1	0.0665	0	0	11.9882
Cpro.30098	cell division - like protein	Chro.30118	cell division protein	0.982	0.0661	0.0074	0.111952	4.2362
Cpro.30099	hypothetical protein	Chro.30119	hypothetical protein	0.972	0.0443	0.0121	0.273138	7.2883
Cpro.30100	hypothetical protein	Chro.30120	hypothetical protein	0.993	0.0663	0.0031	0.0467572	16.4295
Cpro.30101	hypothetical protein	Chro.30121	hypothetical protein	0.991	0.054	0.0038	0.0703704	2.7558
Cpro.30103	hypothetical protein	Chro.30124	hypothetical protein	0.97	0.0659	0.0127	0.192716	4.6
Cpro.30104	hypothetical protein	Chro.30125	hypothetical protein	0.971	0.0462	0.0127	0.274892	4.6
Cpro.30105	hypothetical protein	Chro.30126	hypothetical protein	0.966	0.0634	0.0148	0.233438	4.3283
Cpro.30106	hypothetical protein	Chro.30127	hypothetical protein	0.957	0.0529	0.0185	0.349716	6.1923
Cpro.30107	hypothetical protein	Chro.30128	hypothetical protein	0.981	0.0625	0.0078	0.1248	4.6
Cpro.30108	hypothetical protein	Chro.30129	hypothetical protein	1	0.1044	0	0	20.8235
Cpro.30109	hypothetical protein	Chro.30130	hypothetical protein	0.987	0.0223	0.0056	0.251121	4.6
Cpro.30110	hypothetical protein	Chro.30131	hypothetical protein	1	0.0595	0	0	3.8944
Cpro.30111	hypothetical protein	Chro.30132	hypothetical protein	0.936	0.0769	0.0301	0.391417	14.8184
Cpro.30112	putative cytoplasmic protein of ancient origin (92.4 kD) (3D707)	Chro.30133	cytoplasmic protein of ancient origin (92.4 kD) (3D707)	0.985	0.048	0.0065	0.135417	4.6
Cpro.30113	histone-binding protein n1/n2	Chro.30134	hypothetical protein	0.942	0.0656	0.0097	0.147866	11.9355
Cpro.30115	expressed sequence AW742551	Chro.30136	hypothetical protein	0.969	0.0466	0.0141	0.302575	27.5046
Cpro.30116	hypothetical protein, conserved	Chro.30137	hypothetical protein	0.975	0.0288	0.009	0.3125	4.6
Cpro.30117	hypothetical protein	Chro.30138	hypothetical protein, conserved	0.984	0.0383	0.0078	0.203655	4.6
Cpro.30119	hypothetical protein	Chro.30140	hypothetical protein	0.826	0.0485	0.0467	0.962887	8.4635
Cpro.30120	guanylyl cyclase-related	Chro.30141	guanylyl cyclase-related	0.964	0.0676	0.0152	0.224852	6.6926
Cpro.30121	hypothetical protein	Chro.30142	hypothetical protein	0.962	0.019	0.0192	1.01053	6.6527
Cpro.30122	myb family transcription factor (MYB4R1)	Chro.30143	myb-related transcription factor	0.976	0.0648	0.0108	0.166667	12.3247
Cpro.30123	hypothetical protein	Chro.30144	hypothetical protein	0.974	0.1593	0.0085	0.0533584	0.5594
Cpro.30124	hypothetical protein	Chro.30145	hypothetical protein	0.925	0.0768	0.0351	0.457031	10.151
Cpro.30125	hypothetical protein	Chro.30146	hypothetical protein	0.702	0.1995	0.1655	0.829574	4.3192
Cpro.30126	hypothetical protein	Chro.30147	hypothetical protein	0.848	0.1068	0.0753	0.705056	11.0431
Cpro.30127	hypothetical protein	Chro.30148	hypothetical protein	0.87	0.1482	0.0576	0.388664	7.354
Cpro.30129	hypothetical protein	Chro.30151	hypothetical protein	0.946	0.5868	0.3603	0.614008	1.1506
Cpro.30130	Unknown (protein for MGC:66282)	Chro.30152	hypothetical protein	0.983	0.0858	0.0072	0.0839161	4.6
Cpro.30131	hypothetical protein	Chro.30153	hypothetical protein	0.983	0.0707	0.0075	0.106082	3.5837
Cpro.30132	hypothetical protein	Chro.30154	hypothetical protein	0.972	0.0406	0.0117	0.288177	2.0861
Cpro.30133	hypothetical protein	Chro.30155	coronin binding protein	0.981	0.0331	0.0074	0.223565	0.6665
Cpro.30134	hypothetical protein	Chro.30156	hypothetical protein	0.978	0.0341	0.0111	0.325513	17.9808
Cpro.30135	60S RIBOSOMAL PROTEIN L14 gi|2760015|emb|CAA11176.1| 60S ribosomal protein L14	Chro.30157	60S ribosomal protein L14	0.99	0.0717	0.0044	0.0613668	4.6
Cpro.30136	B1045D11.20	Chro.30158	B1045D11.20	0.985	0.0402	0.0068	0.169154	6.0597
Cpro.30137	centrin, putative	Chro.30159	centrin	0.995	0.0739	0.0021	0.0284168	2.6244
Cpro.30138	Myosin II heavy chain, non muscle gi|84128|pir||A26655 myosin heavy chain	Chro.30160	myosin II heavy chain, non muscle	0.962	0.0426	0.0196	0.460094	17.292
Cpro.30139	14-3-3-LIKE PROTEIN B (14-3-3B) gi|7435024|pir||T04406 14-3-3b protein - barley gi|1070354|emb|CAA63658.1| Hv14-3-3b	Chro.30161	14-3-3-like protein B (14-3-3B)	0.996	0.0428	0.0018	0.0420561	11.8485
Cpro.30140	probable 60s ribosomal protein l12	Chro.30162	60s ribosomal protein l12	1	0.0236	0	0	4.6
Cpro.30141	hypothetical protein	Chro.30163	hypothetical protein	0.971	0.0671	0.0131	0.195231	14.3066
Cpro.30142	hypothetical protein	Chro.30164	hypothetical protein	0.98	0.0629	0.0087	0.138315	4.3583
Cpro.30143	hypothetical protein	Chro.30165	hypothetical protein	0.935	0.1274	0.0093	0.0729984	2.5183
Cpro.30144	putative Upf1p-interacting protein; Nmd3p	Chro.30166	Upf1p-interacting protein\; Nmd3p	0.991	0.0527	0.0037	0.0702087	15.3118
Cpro.30145	hypothetical protein	Chro.30167	hypothetical protein	0.966	0.0641	0.0152	0.237129	8.9494
Cpro.30146	P0700D12.13	Chro.30168	P0700D12.13	0.993	0.0691	0.0028	0.040521	1.6792
Cpro.30147	hypothetical protein	Chro.30169	hypothetical protein	0.984	0.0878	0.0079	0.0899772	12.5159
Cpro.30148	hypothetical protein	Chro.30170	hypothetical protein	0.98	0.0533	0.0089	0.166979	8.2602
Cpro.30149	hypothetical protein	Chro.30171	hypothetical protein	0.984	0.0541	0.0078	0.144177	20.7864
Cpro.30150	pyrophosphate-dependent phosphofructokinase	Chro.30172	pyrophosphate-dependent phosphofructokinase	0.974	0.0534	0.0116	0.217228	12.5192
Cpro.30151	unknown protein	Chro.30173	hypothetical protein	0.944	0.0722	0.0227	0.314404	2.2015
Cpro.30152	hypothetical protein	Chro.30174	hypothetical protein	0.973	0.0597	0.0121	0.20268	4.6
Cpro.30153	replication factor c subunit 4	Chro.30175	replication factor c subunit 4	0.997	0.04	0.0013	0.0325	4.6
Cpro.30154	hypothetical protein	Chro.30176	hypothetical protein	0.989	0.0379	0.0043	0.113456	6.2227
Cpro.30155	dual specificity protein phosphatase, putative	Chro.30177	dual specificity protein phosphatase	0.984	0.0958	0.0073	0.0762004	7.2198
Cpro.30156	hypothetical protein	Chro.30178	hypothetical protein	0.984	0.0389	0.0075	0.192802	10.427
Cpro.30158	hypothetical protein	Chro.30180	hypothetical protein	0.97	0.1139	0.0131	0.115013	3.2929
Cpro.30159	hypothetical protein	Chro.30181	hypothetical protein	0.982	0.0368	0.008	0.217391	2.9332
Cpro.30160	cyclin-dependent kinase 3	Chro.30182	cyclin-dependent kinase 3	0.997	0.0536	0.0014	0.0261194	5.0809
Cpro.30161	hypothetical protein	Chro.30183	hypothetical protein	0.959	0.0109	0.0174	1.59633	4.6
Cpro.30162	hypothetical protein	Chro.30184	hypothetical protein	0.98	0.0592	0.008	0.135135	2.258
Cpro.30163	hypothetical protein	Chro.30186	hypothetical protein	0.982	0.1081	0.0074	0.0684551	2.7324
Cpro.30164	hypothetical protein	Chro.30187	hypothetical protein	0.959	0.102	0.0142	0.139216	7.6218
Cpro.30165	hypothetical protein	Chro.30188	hypothetical protein	1	0.0442	0	0	4.6
Cpro.30166	sporozoite antigen, 19K - Eimeria acervulina gi|405637|emb|CAA81335.1| 19 kDa sporozoite antigen	Chro.30189	sporozoite antigen, 19K	0.981	0.1242	0.0084	0.0676329	6.1296
Cpro.30167	glucosidase II	Chro.30190	glucosidase II	0.992	0.0564	0.0019	0.0336879	6.5325
Cpro.30168	Unknown (protein for MGC:33209)	Chro.30193	hypothetical protein	0.991	0.0597	0.0044	0.0737018	5.114
Cpro.30169	hypothetical protein	Chro.30194	hypothetical protein	0.974	0.0859	0.0102	0.118743	4.1608
Cpro.30170	hypothetical protein	Chro.30195	hypothetical protein	0.95	0.0615	0.0213	0.346341	12.8312
Cpro.30171	ribonuclease P (30kD)	Chro.30196	ribonuclease P (30kD)	0.988	0.0767	0.005	0.065189	6.3414
Cpro.30172	hypothetical protein, conserved	Chro.30197	hypothetical protein	0.994	0.0562	0.0027	0.0480427	4.6
Cpro.30173	hypothetical protein	Chro.30198	hypothetical protein	0.973	0.0499	0.0123	0.246493	12.4532
Cpro.30174	eukaryotic translation initiation factor 2 gamma subunit, putative	Chro.30199	translation initiation factor eIF-2	0.998	0.0474	0.001	0.021097	30.7898
Cpro.30175	hypothetical protein	Chro.30200	hypothetical protein	0.957	0.0528	0.0207	0.392045	20.2567
Cpro.30177	hypothetical protein	Chro.30201	hypothetical protein, conserved	0.883	0.1095	0.0593	0.541553	4.4479
Cpro.30177	hypothetical protein	Chro.30202	hypothetical protein	0.884	0.1095	0.0593	0.541553	4.4479
Cpro.30178	hypothetical protein	Chro.30203	hypothetical protein	0.756	0.1064	0.1341	1.26034	4.8061
Cpro.30179	hypothetical protein	Chro.30204	hypothetical protein	0.925	0.0739	0.0353	0.477673	9.4092
Cpro.30180	hypothetical protein	Chro.30205	hypothetical protein	0.857	0.0738	0.0706	0.95664	4.0616
Cpro.30181	hypothetical protein	Chro.30206	hypothetical protein	0.948	0.0604	0.0246	0.407285	3.5665
Cpro.30182	hypothetical protein	Chro.30207	hypothetical protein	0.879	0.0476	0.0567	1.19118	3.8406
Cpro.30183	hypothetical protein	Chro.30208	hypothetical protein	0.85	0.0618	0.0646	1.04531	24.981
Cpro.30184	hypothetical protein	Chro.30209	hypothetical protein	0.887	0.0805	0.058	0.720497	6.1001
Cpro.30185	hypothetical protein	Chro.30210	hypothetical protein	0.799	0.1183	0.1011	0.854607	6.7409
Cpro.30186	hypothetical protein	Chro.30211	hypothetical protein	0.755	0.1596	0.1334	0.83584	4.762
Cpro.30187	hypothetical protein	Chro.30212	hypothetical protein	0.829	0.0719	0.0777	1.08067	7.9981
Cpro.30188	Similar to cellular apoptosis susceptibility gene product	Chro.30213	cellular apoptosis susceptibility gene product	0.983	0.0684	0.0082	0.119883	14.9143
Cpro.30189	hypothetical protein	Chro.30214	hypothetical protein	0.984	0.037	0.0073	0.197297	4.5747
Cpro.30190	casein kinase i	Chro.30215	casein kinase i	0.988	0.0731	0.0052	0.0711354	6.7944
Cpro.30191	transport protein	Chro.30216	transport protein	0.997	0.0534	0.0012	0.0224719	11.8584
Cpro.30192	hypothetical protein	Chro.30217	hypothetical protein	0.97	0.0515	0.0131	0.254369	6.8033
Cpro.30193	hypothetical protein	Chro.30218	hypothetical protein	0.968	0.0573	0.0146	0.254799	4.0219
Cpro.30194	protein kinase Ck2-beta	Chro.30219	protein kinase Ck2-beta	0.991	0.0409	0.0039	0.0953545	3.8341
Cpro.30195	ENSANGP00000004359	Chro.30220	ENSANGP00000004359	0.977	0.0992	0.0099	0.0997984	4.4012
Cpro.30196	DNA-directed RNA polymerase 2 subunit, putative	Chro.30221	DNA-directed RNA polymerase 2 subunit	1	0.0746	0	0	6.3215
Cpro.30197	RNA-binding protein, putative	Chro.30222	RNA-binding protein	0.966	0.0493	0.0162	0.3286	9.7239
Cpro.30198	transmembrane phosphatase with tensin homology isoform C	Chro.30223	transmembrane phosphatase with tensin y isoform C	0.984	0.0416	0.0078	0.1875	7.4826
Cpro.30199	hypothetical protein	Chro.30224	hypothetical protein	0.99	0.0754	0.0046	0.061008	3.739
Cpro.30200	hypothetical protein	Chro.30225	CG32297-PA	0.968	0.081	0.0128	0.158025	4.5735
Cpro.30201	hypothetical protein	Chro.30226	hypothetical protein	0.969	0.0303	0.0139	0.458746	4.6
Cpro.30202	hypothetical protein	Chro.30227	hypothetical protein	0.963	0.0414	0.0171	0.413043	6.8401
Cpro.30203	histamine-releasing factor, putative	Chro.30228	histamine-releasing factor	0.994	0.0256	0.0028	0.109375	4.6
Cpro.30204	hypothetical protein	Chro.30229	hypothetical protein	0.979	0.0339	0.0099	0.292035	8.2624
Cpro.30205	hypothetical protein	Chro.30230	hypothetical protein	0.983	0.0627	0.0074	0.118022	2.0649
Cpro.30208	hypothetical protein	Chro.30233	hypothetical protein	0.981	0.0662	0.0087	0.13142	9.1744
Cpro.30209	hypothetical protein	Chro.30234	hypothetical protein	0.985	0.0611	0.0061	0.0998363	6.383
Cpro.30210	hypothetical protein	Chro.30235	hypothetical protein	0.963	0.0459	0.0166	0.361656	7.4053
Cpro.30211	hypothetical protein	Chro.30236	hypothetical protein	0.994	0.0539	0.0026	0.0482375	8.2322
Cpro.30212	hypothetical protein	Chro.30237	hypothetical protein	0.988	0.0543	0.0051	0.0939227	18.5647
Cpro.30213	protein phosphatase 1G (formerly 2C), magnesium-dependent, gamma isoform; fibroblast growth factor inducible 13; prprotein phosphatase 1G (formerly 2C), magnesium-dependent, gamma isoform	Chro.30238	Ppm1g-prov protein	0.989	0.068	0.0047	0.0691176	2.6852
Cpro.30215	choline kinase GmCK2p-like protein, putative	Chro.30240	choline kinase GmCK2p-like protein	0.995	0.0476	0.0022	0.0462185	4.6
Cpro.30216	tRNA adenylyltransferase -related	Chro.30241	tRNA adenylyltransferase -related	0.983	0.0434	0.0075	0.172811	3.6733
Cpro.30217	hypothetical protein	Chro.30242	gene_id:MJM18.3~	0.99	0.0827	0.0055	0.0665054	3.6037
Cpro.30218	hypothetical protein	Chro.30243	hypothetical protein	0.977	0.0416	0.0136	0.326923	4.8552
Cpro.30219	hypothetical protein	Chro.30244	hypothetical protein	0.962	0.0421	0.0171	0.406176	7.2615
Cpro.30220	Ion transport protein, putative	Chro.30245	ion transport protein	0.976	0.0574	0.0116	0.202091	8.7811
Cpro.30221	putative ribosomal protein S2	Chro.30246	ribosomal protein S2	1	0.0469	0	0	4.3379
Cpro.30222	phosphatidylserine decarboxylase	Chro.30247	phosphatidylserine decarboxylase	1	0.0838	0	0	4.6
Cpro.30223	nucleolar protein NOP5, putative	Chro.30248	snoRNA binding domain	0.994	0.0818	0.0019	0.0232274	5.5625
Cpro.30224	hypothetical protein	Chro.30249	hypothetical protein	0.989	0.0613	0.0044	0.0717781	4.1217
Cpro.30225	hypothetical protein	Chro.30250	hypothetical protein	0.991	0.0342	0.0041	0.119883	4.6
Cpro.30226	hypothetical protein	Chro.30251	hypothetical protein	0.964	0.0421	0.0153	0.36342	2.4824
Cpro.30227	similar to NM_072339 T15B7	Chro.30252	similar to NM_072339 T15B7	0.992	0.0495	0.0038	0.0767677	8.4074
Cpro.30228	DKFZP547N043 protein	Chro.30253	DKFZP547N043 protein	0.955	0.0675	0.0214	0.317037	10.3369
Cpro.30229	20S proteasome subunit PAA1	Chro.30254	20S proteasome subunit PAA1	0.99	0.0558	0.0045	0.0806452	4.6
Cpro.30230	Proteasome subunit alpha type 6 (20S proteasome alpha subunit A) (20S proteasome subunit alpha-1) (Proteasome iota subunit) gi|7435869|pir||T06142 C 3.4.25.1 proteasome endopeptidase complex () iota chain - soybean gi|3377794|gb|AAC28135.1| proteasome IOTA subunit	Chro.30255	proteasome subunit alpha type 6 (20S proteasome alpha subunit A) (20S proteasome subunit alpha-1) (Proteasome iota subunit)	0.983	0.0463	0.0078	0.168467	4.6
Cpro.30232	type I fatty acid synthase homolog - Cryptosporidium parvum gi|4092069|gb|AAC99407.1| type I fatty acid synthase	Chro.30900	type I fatty acid synthase	0.98	0.0805	0.0085	0.10559	4.2618
Cpro.30233	hypothetical protein	Chro.30259	hypothetical protein	0.982	0.042	0.0085	0.202381	11.8388
Cpro.30234	Proteasome subunit alpha type 3 gi|1408304|gb|AAB03671.1| PrtD	Chro.30260	proteasome subunit alpha type 3	0.984	0.0812	0.0072	0.08867	11.8006
Cpro.30235	replication protein A large subunit	Chro.30261	replication protein A large subunit	0.992	0.0941	0.0035	0.0371945	1.217
Cpro.30236	ubiquitin-conjugating enzyme, putative	Chro.30262	ubiquitin-conjugating enzyme	0.993	0.0695	0.0056	0.0805755	4.6
Cpro.30237	O1, putative	Chro.30263	O1	0.981	0.1214	0.0076	0.062603	1.5708
Cpro.30238	hypothetical protein	Chro.30264	hypothetical protein	0.975	0.0522	0.0114	0.218391	3.4084
Cpro.30239	hypothetical protein	Chro.30265	hypothetical protein	0.986	0.0356	0.0066	0.185393	4.6
Cpro.30240	Flj12787-prov protein	Chro.30266	Flj12787-prov protein	0.964	0.0453	0.0161	0.355408	16.2218
Cpro.30241	hypothetical protein	Chro.30267	hypothetical protein	0.96	0.0474	0.0181	0.381857	9.5123
Cpro.30242	hypothetical protein	Chro.30268	hypothetical protein	0.937	0.0758	0.0318	0.419525	9.948
Cpro.30243	cGMP phosphodiesterase A4, putative	Chro.30269	cGMP phosphodiesterase A4	0.991	0.0462	0.004	0.0865801	15.6632
Cpro.30244	hypothetical protein	Chro.30272	hypothetical protein	0.939	0.0612	0.0273	0.446078	4.6
Cpro.30245	hypothetical protein	Chro.30271	hypothetical protein	0.933	0.0166	0.0335	2.01807	5.1511
Cpro.30246	hypothetical protein F22K20.13	Chro.30274	hypothetical protein	0.966	0.0621	0.015	0.241546	3.9803
Cpro.30247	type ii proteins geranylgeranyltransferase beta subunit	Chro.30275	type ii proteins geranylgeranyltransferase beta subunit	0.971	0.0886	0.012	0.13544	1.0219
Cpro.30248	nucleoporin 98	Chro.30276	hypothetical protein	0.983	0.0688	0.0077	0.111919	4.6
Cpro.30249	F12A21.14	Chro.30277	F12A21.14	0.962	0.0606	0.0166	0.273927	4.6
Cpro.30250	nuclear DNA-binding protein G2p -related	Chro.30278	nuclear DNA-binding protein G2p -related	0.992	0.0835	0.0034	0.0407186	2.9162
Cpro.30251	CG9351-PA	Chro.30279	CG9351-PA	0.979	0.0519	0.0091	0.175337	8.208
Cpro.30252	hypothetical protein	Chro.30280	hypothetical protein	0.971	0.0391	0.0133	0.340153	4.6
Cpro.30253	hypothetical protein	Chro.30281	hypothetical protein	0.978	0.0667	0.0095	0.142429	5.9237
Cpro.30254	hypothetical protein	Chro.30282	hypothetical protein	0.99	0.0149	0.0041	0.275168	4.2086
Cpro.30255	ribosomal protein S18	Chro.30283	ribosomal protein S18	1	0.0786	0	0	4.6
Cpro.30256	hypothetical protein	Chro.30284	hypothetical protein	0.951	0.0785	0.021	0.267516	8.6361
Cpro.30257	UbiA prenyltransferase family member (3I27)	Chro.30285	UbiA prenyltransferase family member (3I27)	0.958	0.1095	0.0193	0.176256	8.4894
Cpro.30258	hypothetical protein	Chro.30286	hypothetical protein	0.972	0.0356	0.0108	0.303371	4.6
Cpro.30259	hypothetical protein	Chro.30287	hypothetical protein	0.968	0.0386	0.0138	0.357513	4.378
Cpro.30260	hypothetical protein	Chro.30288	hypothetical protein	0.982	0.0498	0.0077	0.154618	3.9792
Cpro.30261	thioredoxin-like protein	Chro.30289	hypothetical protein	0.959	0.0618	0.0179	0.289644	4.8763
Cpro.30262	hypothetical protein	Chro.30290	hypothetical protein	0.986	0.0549	0.0062	0.112933	4.6
Cpro.30263	Hypothetical ORF; Ydr026cp	Chro.30291	Ydr026cp	0.972	0.0661	0.0124	0.187595	5.9142
Cpro.30264	hypothetical protein	Chro.30292	subunit of the anaphase-promoting complex/cyclosome (APC/C), which is a ubiquitin-protein ligase required for degradation of anaphase inhibitors, including mitotic cyclins, during the metaphase/anaphase transition\; required for sporulation\; Cdc16p	0.963	0.0868	0.0164	0.18894	5.0812
Cpro.30265	putative proteasome component precursor	Chro.30293	proteasome component precursor	0.989	0.0964	0.0046	0.0477178	4.6
Cpro.30266	hypothetical protein	Chro.30294	hypothetical protein	1	0.0091	0	0	4.6
Cpro.30267	TBC domain, putative	Chro.30295	TBC domain	0.984	0.0463	0.0074	0.159827	8.3698
Cpro.30268	hypothetical protein	Chro.30296	hypothetical protein	0.967	0.0829	0.0139	0.167672	4.8226
Cpro.30269	probable RNA-binding protein	Chro.30297	RNA-binding protein	0.987	0.0694	0.0054	0.0778098	3.7112
Cpro.30270	kinesin-related protein K2	Chro.30298	kinesin-related protein K2	0.98	0.0455	0.0099	0.217582	6.9524
Cpro.30271	hypothetical protein	Chro.30299	hypothetical protein	0.947	0.064	0.0243	0.379688	5.4593
Cpro.30272	hypothetical protein	Chro.30300	hypothetical protein	0.974	0.0533	0.0115	0.21576	4.2091
Cpro.30273	DNA-directed RNA polymerase (EC 2.7.7.6) II largest chain	Chro.30301	DNA-directed RNA polymerase (EC 2.7.7.6) II largest chain	0.994	0.0994	0.0028	0.028169	8.5393
Cpro.30274	diacylglycerol kinase protein DgkA	Chro.30302	SgcA	0.973	0.0446	0.0119	0.266816	8.9752
Cpro.30276	hypothetical protein	Chro.30304	hypothetical protein	0.933	0.1009	0.0302	0.299306	2.0897
Cpro.30277	hypothetical protein	Chro.30305	hypothetical protein, conserved	0.978	0.0691	0.0099	0.143271	4.6
Cpro.30278	probable microsomal signal peptidase 22 kDa subunit, putative	Chro.30306	hypothetical protein	0.983	0.0584	0.0077	0.131849	4.6
Cpro.30279	hypothetical protein	Chro.30307	hypothetical protein	0.972	0.0179	0.0132	0.73743	11.3999
Cpro.30280	hypothetical protein	Chro.30308	hypothetical protein	0.989	0.0621	0.0047	0.0756844	4.6
Cpro.30281	hypothetical protein	Chro.30309	hypothetical protein	0.963	0.0476	0.0165	0.346639	6.125
Cpro.30282	ATPase, aminophospholipid transporter-like, class I, type 8A, member 2; ATPase, class 1, member a; ATPase 8A2, p type; ATPase 8A2, class I	Chro.30311	ATPase, aminophospholipid transporter-like, class I, type 8A, member 2\; ATPase, class 1, member a\; ATPase 8A2, p type\; ATPase 8A2, class I	0.986	0.07	0.0058	0.0828571	7.2952
Cpro.30283	Krox-like protein	Chro.30312	Krox-like protein	0.961	0.0717	0.0178	0.248257	5.8267
Cpro.30284	hypothetical protein	Chro.30313	hypothetical protein	0.938	0.053	0.0304	0.573585	18.2409
Cpro.30285	hypothetical protein	Chro.30314	hypothetical protein	0.933	0.0345	0.0322	0.933333	5.5718
Cpro.30286	hypothetical protein	Chro.30315	hypothetical protein	0.863	0.1964	0.0593	0.301935	1.932
Cpro.30287	hypothetical protein	Chro.30316	hypothetical protein	0.98	0.0747	0.0085	0.113788	6.3065
Cpro.30288	ENSANGP00000021534	Chro.30317	hypothetical protein	0.966	0.0477	0.0175	0.366876	4.6
Cpro.30289	hypothetical protein	Chro.30318	hypothetical protein	0.954	0.0483	0.0209	0.432712	14.0522
Cpro.30290	hypothetical protein	Chro.30319	chaperone protein - related	0.951	0.0557	0.0217	0.389587	7.0201
Cpro.30291	Unknown protein	Chro.30320	hypothetical protein	0.972	0.0822	0.012	0.145985	3.6561
Cpro.30292	hypothetical protein	Chro.30321	hypothetical protein	0.958	0.103	0.0177	0.171845	4.0073
Cpro.30293	hypothetical protein	Chro.30322	hypothetical protein	0.93	0.0377	0.0302	0.801061	6.6345
Cpro.30294	hypothetical protein	Chro.30323	hypothetical protein	0.948	0.0492	0.0223	0.453252	4.6
Cpro.30295	hypothetical protein	Chro.30324	hypothetical protein	0.984	0.0894	0.007	0.0782998	5.8542
Cpro.30296	Aa2-050	Chro.30325	hypothetical protein	0.982	0.0851	0.0081	0.0951821	9.4667
Cpro.30298	Leucine Rich Repeat, putative	Chro.30327	hypothetical protein	0.994	0.0818	0.0026	0.0317848	4.6
Cpro.30299	ENSANGP00000005722	Chro.30328	ENSANGP00000005722	0.994	0.0641	0.0024	0.0374415	5.7138
Cpro.30300	putative protein Roco7	Chro.30329	protein Roco7	0.973	0.0459	0.0117	0.254902	5.2149
Cpro.30301	hypothetical protein	Chro.30330	hypothetical protein	0.973	0.0779	0.0114	0.146341	2.1418
Cpro.30302	hypothetical protein	Chro.30331	hypothetical protein	0.977	0.0643	0.0101	0.157076	10.0009
Cpro.30303	mitochondrial import inner membrane translocase, putative	Chro.30332	mitochondrial import inner membrane translocase	0.962	0.0418	0.0166	0.397129	5.7734
Cpro.30304	cardiolipin synthetase, putative	Chro.30333	cardiolipin synthetase	0.972	0.0465	0.0127	0.273118	18.9175
Cpro.30305	strong similarity to yeast cell division and spore germination protein Krr1p	Chro.30334	hypothetical protein	0.982	0.0353	0.0081	0.229462	3.4696
Cpro.30306	hypothetical protein	Chro.30335	hypothetical protein	0.969	0.0684	0.0147	0.214912	4.8688
Cpro.30307	hypothetical protein	Chro.30337	hypothetical protein	0.97	0.0707	0.0127	0.179632	4.0391
Cpro.30308	Similar to cDNA sequence BC020002	Chro.30338	ENSANGP00000011856	0.969	0.0531	0.0142	0.26742	16.296
Cpro.30309	hypothetical protein	Chro.30339	hypothetical protein	0.976	0.0631	0.0109	0.172742	4.7369
Cpro.30310	hypothetical protein, conserved	Chro.30340	hypothetical protein	0.974	0.0684	0.0117	0.171053	3.641
Cpro.30311	hypothetical protein	Chro.30341	hypothetical protein	0.953	0.0509	0.0209	0.410609	7.1269
Cpro.30312	guanine nucleotide exchange factor eIF-2B delta chain, long form - mouse	Chro.30342	guanine nucleotide exchange factor eIF-2B delta chain, long form - mouse	0.997	0.0608	0.0013	0.0213816	14.8823
Cpro.30313	putative MAPK	Chro.30343	MAPK	0.991	0.0715	0.004	0.0559441	10.2354
Cpro.30314	protein kinase (EC 2.7.1.37), cAMP-dependent, catalytic chain - Plasmodium yoelii gi|1089793|dbj|BAA08284.1| cAMP-dependent protein kinase catalytic subunit	Chro.30344	protein kinase (EC 2.7.1.37), cAMP-dependent, catalytic chain	0.995	0.0408	0.0022	0.0539216	4.6
Cpro.30315	hypothetical protein	Chro.30345	hypothetical protein	0.938	0.0452	0.0293	0.64823	15.6542
Cpro.30316	crm1 protein	Chro.30346	exportin 1 (chromosome region maintenance protein 1) (caffeine resistance protein 2)	0.986	0.0564	0.0064	0.113475	16.8722
Cpro.30317	hypothetical protein	Chro.30347	hypothetical protein	0.951	0.0897	0.0222	0.247492	7.6031
Cpro.30318	P0426D06.17	Chro.30349	smu-1	0.943	0.0665	0.0264	0.396992	15.2469
Cpro.30319	hypothetical protein	Chro.30350	hypothetical protein	0.951	0.0777	0.0202	0.259974	3.4251
Cpro.30320	similar to hypothetical protein FLJ37300	Chro.30351	similar to protein FLJ37300	0.972	0.0358	0.0123	0.343575	4.926
Cpro.30321	hypothetical protein, conserved	Chro.30352	hypothetical protein	0.998	0.0505	0.001	0.019802	3.4531
Cpro.30322	W43325 comes from this gene., putative	Chro.30353	hypothetical protein	0.981	0.0616	0.0085	0.137987	5.7211
Cpro.30323	alternative oxidase	Chro.30354	alternative oxidase	0.97	0.0544	0.0143	0.262868	4.952
Cpro.30324	hypothetical protein	Chro.30355	hypothetical protein	0.991	0.0371	0.0038	0.102426	2.2134
Cpro.30325	hypothetical protein	Chro.30356	hypothetical protein	0.991	0.0538	0.0039	0.0724907	4.6
Cpro.30326	Rab5	Chro.30357	Rab5	0.991	0.027	0.004	0.148148	4.6
Cpro.30327	hypothetical protein	Chro.30358	hypothetical protein	0.965	0.0711	0.0164	0.230661	8.0641
Cpro.30328	replication factor C3	Chro.30359	replication factor C3	0.987	0.0815	0.0057	0.0699387	2.8531
Cpro.30329	hypothetical protein	Chro.30360	hypothetical protein	0.984	0.06	0.0074	0.123333	19.5806
Cpro.30330	histone acetyltransferase	Chro.30361	histone acetyltransferase	0.989	0.0656	0.0046	0.070122	4.7758
Cpro.30331	hypothetical protein	Chro.30362	hypothetical protein	0.99	0.1136	0.0044	0.0387324	3.9651
Cpro.30332	hypothetical protein	Chro.30363	hypothetical protein	0.982	0.0571	0.0079	0.138354	11.7356
Cpro.30333	hypothetical protein	Chro.30364	hypothetical protein	0.975	0.0963	0.0053	0.0550363	4.6
Cpro.30334	hypothetical protein	Chro.30365	hypothetical protein	0.986	0.0407	0.0063	0.154791	4.6
Cpro.30335	PV1H14080_P	Chro.30366	PV1H14080_P	0.988	0.061	0.0057	0.0934426	5.2159
Cpro.30336	putative actin-related complex protein	Chro.30367	actin-related complex protein	0.978	0.0858	0.009	0.104895	10.8938
Cpro.30337	Ser/Thr protein kinase, putative	Chro.30368	hypothetical protein	0.972	0.0442	0.011	0.248869	6.1295
Cpro.30338	hypothetical protein PH1820	Chro.30369	hypothetical protein	0.986	0.0755	0.006	0.0794702	4.6
Cpro.30340	OSJNBa0013K16.9	Chro.30371	hypothetical protein	0.992	0.1239	0.0037	0.0298628	6.8684
Cpro.30341	hypothetical protein	Chro.30372	hypothetical protein	0.681	0.4138	0.2159	0.52175	1.0968
Cpro.30342	protein ad-004	Chro.30373	protein ad-004	0.994	0.0818	0.0025	0.0305623	4.6
Cpro.30343	hypothetical protein	Chro.30374	hypothetical protein	0.983	0.0886	0.0058	0.0654628	1.9416
Cpro.30344	hypothetical protein	Chro.30375	hypothetical protein	0.988	0.0829	0.0049	0.0591074	2.1282
Cpro.30345	similar to CGI-125 protein	Chro.30376	similar to CGI-125 protein	0.983	0.0391	0.0081	0.207161	4.6
Cpro.30346	hypothetical protein	Chro.30377	hypothetical protein	0.93	0.052	0.0268	0.515385	6.0779
Cpro.30347	phenylalanyl-trna synthetase - like protein	Chro.30378	phenylalanyl-trna synthetase - like protein	0.986	0.054	0.0061	0.112963	5.6371
Cpro.30348	hypothetical protein	Chro.30379	hypothetical protein	0.981	0.0501	0.0083	0.165669	4.2991
Cpro.30349	SECIS binding protein 2	Chro.30380	SECIS binding protein 2	0.977	0.0708	0.0094	0.132768	5.0077
Cpro.30350	streptococcal hemagglutinin protein	Chro.30381	hypothetical protein	0.964	0.049	0.0172	0.35102	28.6958
Cpro.30351	hypothetical protein	Chro.30382	hypothetical protein	0.966	0.0586	0.0153	0.261092	8.633
Cpro.30352	hypothetical protein	Chro.30383	hypothetical protein	0.932	0.0882	0.0345	0.391156	4.9776
Cpro.30353	ENSANGP00000021948	Chro.30384	ENSANGP00000021948	0.979	0.0616	0.0102	0.165584	4.8721
Cpro.30354	synthetic antigen of P.falciparum, putative	Chro.30385	synthetic antigen	0.96	0.0491	0.0185	0.376782	8.3903
Cpro.30355	hypothetical protein	Chro.30386	hypothetical protein	0.94	0.0497	0.0253	0.509054	13.4704
Cpro.30356	hypothetical protein	Chro.30387	hypothetical protein	0.97	0.0354	0.0119	0.336158	5.396
Cpro.30357	amiloride binding protein 1	Chro.30388	amiloride binding protein 1	0.988	0.0639	0.0046	0.0719875	4.9654
Cpro.30358	dnaK-type molecular chaperone hsp70, organellar - Eimeria tenella gi|603814|emb|CAA87086.1| organellar heat shock protein	Chro.30389	dnaK-type molecular chaperone hsp70, organellar	0.991	0.0464	0.0038	0.0818966	8.5612
Cpro.30359	hypothetical protein	Chro.30390	hypothetical protein	0.961	0.0655	0.0217	0.331298	6.2182
Cpro.30360	hypothetical protein	Chro.30391	hypothetical protein	0.981	0.0625	0.0083	0.1328	10.4691
Cpro.30361	proliferating cell nuclear antigen	Chro.30392	proliferating cell nuclear antigen	0.992	0.0774	0.003	0.0387597	1.9521
Cpro.30362	putative protein transport protein; with sec7 domain	Chro.30393	hypothetical protein	0.981	0.0444	0.0079	0.177928	4.5549
Cpro.30363	hypothetical protein	Chro.30394	hypothetical protein	0.973	0.0534	0.0114	0.213483	8.94
Cpro.30364	hypothetical protein	Chro.30395	hypothetical protein	0.971	0.0791	0.012	0.151707	6.1273
Cpro.30365	hypothetical protein	Chro.30396	hypothetical protein	0.95	0.1019	0.0229	0.22473	8.5807
Cpro.30366	cation exchanger, putative (CAX11)	Chro.30397	cation exchanger (CAX11)	0.983	0.0696	0.0069	0.0991379	6.4076
Cpro.30367	hypothetical protein	Chro.30398	hypothetical protein	0.986	0.0828	0.0058	0.0700483	4.6
Cpro.30368	hypothetical protein	Chro.30399	hypothetical protein	0.96	0.0401	0.0161	0.401496	4.6
Cpro.30369	hypothetical protein	Chro.30400	hypothetical protein	0.948	0.0626	0.0206	0.329073	0.9711
Cpro.30370	hypothetical protein	Chro.30401	hypothetical protein	1	0.0709	0	0	4.6
Cpro.30371	similar to Mus musculus (Mouse). 13 days embryo heart cDNA, RIKEN full-length enriched library, clone:D330046B13 product:minichromosome maintenance deficient (S. cerevisiae) 3-associated protein, full insert sequence (Fragment)	Chro.30403	hypothetical protein	0.961	0.0643	0.0166	0.258165	3.529
Cpro.30372	GTP-binding-like protein	Chro.30404	GTP-binding-like protein	1	0.0542	0	0	23.8025
Cpro.30373	hypothetical protein	Chro.30405	hypothetical protein	0.969	0.0722	0.0136	0.188366	4.6
Cpro.30374	hypothetical protein	Chro.30406	hypothetical protein	0.939	0.0627	0.0273	0.435407	8.917
Cpro.30375	hypothetical protein	Chro.30407	hypothetical protein	0.994	0.0486	0.0032	0.0658436	11.9633
Cpro.30376	Unknown (protein for MGC:55944)	Chro.30408	hypothetical protein	0.987	0.0872	0.0062	0.0711009	4.4794
Cpro.30377	hypothetical protein	Chro.30409	hypothetical protein	0.864	0.1552	0.0356	0.229381	4.1235
Cpro.30378	hypothetical protein	Chro.30410	hypothetical protein	0.988	0.0536	0	0	4.6
Cpro.30379	hypothetical protein	Chro.30412	hypothetical protein	0.959	0.1414	0.0229	0.161952	1.5326
Cpro.30380	hypothetical protein	Chro.30413	hypothetical protein	0.935	0.0836	0.0287	0.343301	2.6787
Cpro.30381	Yersinia pestis BolA-like protein	Chro.30414	Yersinia pestis BolA-like protein	0.965	0.1102	0.0185	0.167877	0.6587
Cpro.30383	Mus musculus RIKEN cDNA 2310047O13 gene	Chro.30416	hypothetical protein	0.964	0.0864	0.0062	0.0717593	1.0263
Cpro.30384	U5 snRNP 100 kD protein	Chro.30417	U5 snRNP 100 kD protein	0.979	0.1116	0.0107	0.0958781	1.8548
Cpro.30386	hypothetical protein	Chro.30420	hypothetical protein	0.942	0.1107	0.0245	0.221319	3.5186
Cpro.30387	hypothetical protein	Chro.30421	hypothetical protein	0.974	0.0604	0.0094	0.155629	17.5527
Cpro.30388	hypothetical protein	Chro.30422	hypothetical protein	0.915	0.1585	0.0426	0.26877	1.2082
Cpro.30389	hypothetical protein	Chro.30423	hypothetical protein, conserved	0.969	0.053	0.0132	0.249057	4.6
Cpro.30390	hypothetical protein	Chro.30424	P-type ATPase 2	0.849	0.3166	0.0673	0.212571	0.3597
Cpro.30392	multiprotein bridging factor type 1	Chro.30426	multiprotein bridging factor type 1	0.993	0.0535	0.0028	0.0523364	2.6215
Cpro.30393	heat shock protein 83 - Trypanosoma brucei	Chro.30427	heat shock protein 83	1	0.0306	0	0	4.6
Cpro.30394	hypothetical protein	Chro.30428	hypothetical protein	0.977	0.0563	0.0103	0.182948	4.9226
Cpro.30395	60S ribosomal protein L19, putative	Chro.30429	60S ribosomal protein L19	0.993	0.0626	0.003	0.0479233	4.6
Cpro.30396	hypothetical protein	Chro.30430	hypothetical protein	0.985	0.1024	0.0058	0.0566406	4.9811
Cpro.30398	DNA LIGASE I (POLYDEOXYRIBONUCLEOTIDE SYNTHASE	Chro.30432	hypothetical protein	0.967	0.122	0.0155	0.127049	1.0613
Cpro.30399	hypothetical protein	Chro.30433	hypothetical protein	0.986	0.0414	0.0064	0.154589	7.1026
Cpro.30400	isoleucine-tRNA synthetase	Chro.30434	isoleucine-tRNA synthetase	0.98	0.0332	0.0035	0.105422	7.5034
Cpro.30401	hypothetical protein, conserved	Chro.30435	hypothetical protein	0.992	0.078	0.004	0.0512821	4.2048
Cpro.30402	hypothetical protein	Chro.30436	hypothetical protein	0.99	0.061	0.0048	0.0786885	7.4402
Cpro.30403	hypothetical protein, conserved	Chro.30437	hypothetical protein	1	0.0764	0	0	4.6
Cpro.30405	hypothetical protein	Chro.30440	hypothetical protein	0.957	0.0886	0.0192	0.216704	3.9008
Cpro.30406	hypothetical protein	Chro.30441	hypothetical protein	0.957	0.0499	0.0152	0.304609	8.8952
Cpro.30407	DEAD/DEAH box ATP-dependent RNA helicase, putative	Chro.30442	DEAD/DEAH box ATP-dependent RNA helicase	0.992	0.0914	0.0031	0.0339168	11.558
Cpro.30408	ribosomal protein L22	Chro.30443	ribosomal protein L22	0.978	0.0161	0.0094	0.583851	1.8186
Cpro.30409	hypothetical protein	Chro.30444	hypothetical protein	0.986	0.0942	0.0055	0.0583864	15.7111
Cpro.30410	expressed protein	Chro.30445	hypothetical protein	0.99	0.0432	0.0046	0.106481	3.7637
Cpro.30411	hypothetical protein	Chro.30446	hypothetical protein	0.964	0.0866	0.0148	0.170901	3.4261
Cpro.30412	uncharacterized domain 2, putative	Chro.30448	uncharacterized domain 2	1	0.0687	0	0	9.8484
Cpro.30413	hypothetical protein	Chro.30449	hypothetical protein	0.918	0.093	0.0291	0.312903	5.5225
Cpro.30414	hypothetical protein	Chro.30450	hypothetical protein	0.961	0.06	0.0179	0.298333	11.6958
Cpro.30415	hypothetical protein	Chro.30451	hypothetical protein	0.95	0.0749	0.021	0.280374	4.6
Cpro.30416	similar to calcyclin binding protein	Chro.30452	similar to calcyclin binding protein	0.992	0.0607	0.0035	0.0576606	4.6
Cpro.30417	CG10306-PA	Chro.30453	CG10306-PA	0.987	0.085	0.0054	0.0635294	1.522
Cpro.30418	PP1201 protein	Chro.30454	Grina-prov protein	0.968	0.0425	0.016	0.376471	11.1571
Cpro.30419	hypothetical protein	Chro.30455	hypothetical protein	0.954	0.1133	0.0087	0.0767873	5.5013
Cpro.30420	mitotic cyclin-CYC2	Chro.30456	mitotic cyclin-CYC2	0.985	0.0516	0.0064	0.124031	4.7035
Cpro.30421	expressed protein	Chro.30457	membrane nuclease, lipoprotein	0.972	0.0803	0.0122	0.15193	4.5829
Cpro.30422	monosaccharide transporter, putative	Chro.30458	hexose transporter	0.993	0.0561	0.0031	0.0552585	17.5615
Cpro.30423	AI196514 protein	Chro.30459	AI196514 protein	0.97	0.0646	0.0131	0.202786	8.1787
Cpro.30424	P0434B04.11	Chro.30460	hypothetical protein	0.963	0.052	0.0168	0.323077	8.4656
Cpro.30425	Similar to RIKEN cDNA 5730427N09 gene	Chro.30461	RIKEN cDNA 5730427N09 gene	1	0.0549	0	0	4.6
Cpro.30426	hypothetical protein	Chro.30462	hypothetical protein	0.99	0.1602	0.0042	0.0262172	4.6
Cpro.30427	hypothetical protein	Chro.30463	hypothetical protein	0.982	0.04	0.0079	0.1975	4.6
Cpro.30428	hypothetical protein	Chro.30464	hypothetical protein	0.972	0.0772	0.014	0.181347	4.9719
Cpro.30429	Hypothetical ORF; Yor291wp	Chro.30465	Yor291wp	0.962	0.0772	0.0184	0.238342	9.579
Cpro.30430	similar to Nectria haematococca. Cutinase negative acting protein	Chro.30466	cutinase negative acting protein	0.947	0.1002	0.0256	0.255489	4.1802
Cpro.30431	Cp22.4.1 protein	Chro.30467	Cp22.4.1 protein	0.939	0.0543	0.0101	0.186004	3.8437
Cpro.30432	insulin degrading enzyme	Chro.30468	insulin degrading enzyme	0.97	0.074	0.0137	0.185135	13.9598
Cpro.30433	insulin-degrading enzyme	Chro.30469	integral membrane protein	0.926	0.0639	0.0241	0.377152	8.0218
Cpro.30434	hypothetical protein	Chro.30470	hypothetical protein	0.913	0.1025	0.0408	0.398049	6.1016
Cpro.30436	peptidase, M16 family	Chro.30474	peptidase, M16 family	0.979	0.0525	0.0101	0.192381	14.0431
Cpro.30437	peptidase, insulinase family	Chro.30475	peptidase, insulinase family	0.969	0.0578	0.0147	0.254325	15.4283
Cpro.30438	hypothetical protein	Chro.30476	hypothetical protein	0.942	0.0809	0.0278	0.343634	6.9603
Cpro.30440	insulysin; insulinase	Chro.30478	hypothetical protein	0.913	0.0877	0.0296	0.337514	12.8034
Cpro.30441	hypothetical protein	Chro.30479	zinc protease	0.854	0.2503	0.0731	0.29205	4.045
Cpro.30442	hypothetical protein	Chro.30479	zinc protease	0.771	0.3084	0.1284	0.416342	5.4166
Cpro.30443	hypothetical protein	Chro.30482	hypothetical protein	0.967	0.1212	0.0165	0.136139	3.8148
Cpro.30444	type I DNA polymerase alpha	Chro.30484	DNA polymerase alpha, DNAPol alpha	0.975	0.0764	0.0116	0.151832	5.6041
Cpro.30445	hypothetical protein	Chro.30485	hypothetical protein	0.968	0.0516	0.014	0.271318	4.418
Cpro.30446	sexual stage-specific protein kinase	Chro.30486	sexual stage-specific protein kinase	0.943	0.0774	0.0213	0.275194	5.9457
Cpro.30447	ENSANGP00000013430	Chro.30487	ENSANGP00000013430	0.966	0.0873	0.0147	0.168385	7.9456
Cpro.30448	hypothetical protein	Chro.30488	hypothetical protein	0.941	0.0851	0.026	0.305523	4.427
Cpro.30449	hypothetical protein	Chro.30489	hypothetical protein	0.97	0.0467	0.0131	0.280514	5.8443
Cpro.30450	hypothetical protein	Chro.30490	hypothetical protein	0.885	0.1227	0.0541	0.440913	8.3668
Cpro.40001	hypothetical protein	Chro.40010	hypothetical protein	0.869	0.0919	0.0592	0.644178	7.0744
Cpro.40003	hypothetical protein	Chro.40012	hypothetical protein	0.8	0.2944	0.1309	0.444633	1.2657
Cpro.40004	hypothetical protein	Chro.40013	hypothetical protein	0.972	0.0916	0.012	0.131004	7.3851
Cpro.40005	hypothetical protein	Chro.40014	hypothetical protein	0.849	0.0222	0.0746	3.36036	9.0889
Cpro.40006	hypothetical protein	Chro.40015	hypothetical protein	0.944	0.0686	0.0258	0.376093	14.1619
Cpro.40007	hypothetical protein	Chro.40016	hypothetical protein	0.933	0.1332	0.0224	0.168168	4.6
Cpro.40008	Hypothetical protein CBG06001	Chro.40017	hypothetical protein	0.974	0.0922	0.0119	0.129067	10.8289
Cpro.40009	hypothetical protein	Chro.40018	hypothetical protein	0.989	0.1552	0.0043	0.0277062	1.809
Cpro.40010	cysteine repeat modular protein 1 PbCRM1	Chro.40019	hypothetical protein	0.975	0.0728	0.0104	0.142857	3.9635
Cpro.40011	hepatocellular carcinoma-associated antigen 56A	Chro.40020	hypothetical protein	0.962	0.0625	0.0164	0.2624	5.1789
Cpro.40012	hypothetical protein, conserved	Chro.40021	hypothetical protein	0.976	0.0647	0.0111	0.171561	13.6921
Cpro.40015	hypothetical protein	Chro.40024	hypothetical protein	0.974	0.0716	0.0111	0.155028	11.9317
Cpro.40016	Hypothetical protein CBG21312	Chro.40025	hypothetical protein	0.976	0.0648	0.0102	0.157407	3.8055
Cpro.40017	hypothetical protein	Chro.40027	hypothetical protein	0.961	0.0433	0.0143	0.330254	8.0503
Cpro.40018	DNA repair protein rhp16, putative	Chro.40028	DNA repair protein rhp16	0.978	0.0724	0.0077	0.106354	4.7494
Cpro.40019	Putative snoRNA binding domain, putative	Chro.40029	snoRNA binding domain	0.995	0.0589	0.002	0.0339559	4.6
Cpro.40020	hypothetical protein	Chro.40030	hypothetical protein	0.949	0.0932	0.0249	0.267167	4.154
Cpro.40021	hypothetical protein	Chro.40031	hypothetical protein	0.972	0.0181	0.0114	0.629834	3.9473
Cpro.40022	hypothetical protein	Chro.40032	hypothetical protein	0.973	0.0666	0.013	0.195195	9.5184
Cpro.40023	hypothetical protein	Chro.40033	hypothetical protein	0.962	0.0617	0.0186	0.301459	3.4064
Cpro.40024	similar to Entamoeba histolytica. Myosin heavy chain	Chro.40034	myosin heavy chain	0.93	0.1158	0.0173	0.149396	4.4656
Cpro.40025	ubiquitin-conjugating enzyme, putative	Chro.40035	ubiquitin-conjugating enzyme	1	0.036	0	0	4.6
Cpro.40026	hypothetical protein	Chro.40036	hypothetical protein	0.974	0.0487	0.0117	0.240246	4.6
Cpro.40027	hypothetical protein	Chro.40037	hypothetical protein	1	0.0482	0	0	4.6
Cpro.40028	glycogen synthase kinase homolog - malaria parasite (Plasmodium falciparum)	Chro.40038	hypothetical protein	0.997	0.0344	0.0012	0.0348837	24.4988
Cpro.40029	proteasome subunit, putative	Chro.40039	proteasome subunit	0.992	0.0342	0.0032	0.0935673	4.6
Cpro.40030	hypothetical protein, conserved	Chro.40040	hypothetical protein	0.987	0.0577	0.0053	0.0918544	24.1397
Cpro.40031	hypothetical protein	Chro.40041	hypothetical protein	0.979	0.0913	0.0098	0.107338	11.3258
Cpro.40032	unnamed protein product	Chro.40042	hypothetical protein	0.978	0.0741	0.0092	0.124157	3.8202
Cpro.40034	Lipase (lipP-2)	Chro.40044	hypothetical protein	1	0.1006	0	0	4.6
Cpro.40035	hypothetical protein	Chro.40045	hypothetical protein	0.964	0.0449	0.0147	0.327394	5.2268
Cpro.40036	Rab11	Chro.40046	Rab11	1	0.0892	0	0	4.6
Cpro.40037	hypothetical protein	Chro.40047	hypothetical protein	0.987	0.0373	0.0058	0.155496	4.6
Cpro.40038	hypothetical protein	Chro.40048	hypothetical protein	0.967	0.0462	0.0155	0.335498	6.3572
Cpro.40039	hypothetical protein	Chro.40049	hypothetical protein	0.989	0.046	0.0049	0.106522	5.8547
Cpro.40040	hypothetical protein	Chro.40050	hypothetical protein	0.991	0.0586	0.0042	0.0716724	12.6218
Cpro.40041	hypothetical protein	Chro.40051	SET domain	0.944	0.104	0.0315	0.302885	1.4441
Cpro.40042	hypothetical protein	Chro.40052	hypothetical protein	0.995	0.0182	0.0022	0.120879	4.6
Cpro.40043	hypothetical protein MG03690.4	Chro.40053	hypothetical protein	0.964	0.0534	0.0161	0.301498	6.3894
Cpro.40044	FK506-binding protein FKBP51	Chro.40054	FK506-binding protein FKBP51	0.988	0.0671	0.005	0.0745156	8.2535
Cpro.40045	similar to ORF YJR070C from S. cerevisiae	Chro.40055	hypothetical protein	0.99	0.0443	0.0045	0.10158	28.4148
Cpro.40046	CG4196-PC	Chro.40056	CG4196-PC	0.989	0.052	0.0048	0.0923077	4.6
Cpro.40047	hypothetical protein	Chro.40057	hypothetical protein	0.974	0.0319	0.0117	0.366771	5.9795
Cpro.40048	RAD2	Chro.40058	RAD2	0.947	0.0852	0.0162	0.190141	10.5831
Cpro.40049	hypothetical protein	Chro.40060	hypothetical protein	0.975	0.0587	0.009	0.153322	4.58
Cpro.40050	hypothetical protein	Chro.40061	hypothetical protein	0.986	0.0758	0.0049	0.0646438	3.0092
Cpro.40051	Eukaryotic ribosomal protein L18, putative	Chro.40062	eukaryotic ribosomal protein L18	0.989	0.0336	0.0049	0.145833	4.6
Cpro.40052	KIAA0866 protein	Chro.40063	hypothetical protein	0.97	0.0605	0.0148	0.244628	7.916
Cpro.40053	hypothetical protein	Chro.40064	PE_PGRS	0.981	0.0728	0.0073	0.100275	6.5459
Cpro.40055	hypothetical protein	Chro.40066	oocyst wall protein 7 precursor	0.986	0.097	0.0056	0.057732	7.9135
Cpro.40056	hypothetical protein	Chro.40067	hypothetical protein	0.951	0.0953	0.0157	0.164743	4.8377
Cpro.40057	hypothetical protein	Chro.40068	hypothetical protein	0.974	0.0455	0.0098	0.215385	3.8141
Cpro.40058	probable 26S proteasome non-ATPase chain S5a	Chro.40069	26S proteasome regulatory subunit S5A	0.987	0.0525	0.0056	0.106667	6.9817
Cpro.40059	vacuolar ATP synthase, putative	Chro.40070	vacuolar ATP synthase	0.993	0.0502	0.0031	0.061753	3.7084
Cpro.40060	hypothetical protein	Chro.40071	hypothetical protein	0.964	0.0574	0.017	0.296167	4.574
Cpro.40061	hypothetical protein	Chro.40072	hypothetical protein	0.958	0.0695	0.0174	0.25036	4.4031
Cpro.40062	ubiquitin-conjugating enzyme	Chro.40073	ubiquitin-conjugating enzyme	1	0.0362	0	0	4.6
Cpro.40063	hypothetical protein	Chro.40074	hypothetical protein	0.979	0.0667	0.01	0.149925	12.9815
Cpro.40064	Nuclear transport factor 2 (NTF-2) gi|5360221|dbj|BAA81910.1| nuclear transport factor 2 (NTF2)	Chro.40075	nuclear transport factor 2 (NTF-2)	1	0.0549	0	0	3.774
Cpro.40065	hypothetical protein	Chro.40076	hypothetical protein	0.959	0.0499	0.0072	0.144289	4.2047
Cpro.40066	Hypothetical protein CBG12063	Chro.40077	hypothetical protein	0.964	0.0617	0.0161	0.26094	5.5236
Cpro.40067	hypothetical protein	Chro.40078	hypothetical protein	0.96	0.0784	0.0179	0.228316	0.71
Cpro.40068	hypothetical protein	Chro.40079	hypothetical protein	0.993	0.0907	0.003	0.0330761	4.6
Cpro.40069	hypothetical protein	Chro.40080	hypothetical protein	0.946	0.1018	0.0258	0.253438	6.9266
Cpro.40070	hypothetical protein	Chro.40082	bromodomain	0.977	0.0681	0.0104	0.152717	7.7082
Cpro.40071	unnamed protein product	Chro.40084	hypothetical protein	1	0.0867	0	0	15.3167
Cpro.40072	oocyst wall protein 3 precursor	Chro.40085	oocyst wall protein 3 precursor	0.953	0.1119	0.0269	0.240393	4.1328
Cpro.40073	hypothetical protein	Chro.40086	hypothetical protein	0.982	0.0604	0.0075	0.124172	8.5032
Cpro.40074	Pyruvate dehydrogenase	Chro.40087	pyruvate dehydrogenase	0.996	0.0608	0.0016	0.0263158	17.7306
Cpro.40075	bll4978	Chro.40088	bll4978	0.984	0.047	0.0069	0.146809	13.0691
Cpro.40076	MGC52939 protein	Chro.40089	hypothetical protein	0.957	0.0791	0.0201	0.254109	4.6
Cpro.40077	nucleosome assembly protein	Chro.40090	nucleosome assembly protein	0.979	0.071	0.0091	0.128169	7.4263
Cpro.40078	hypothetical protein	Chro.40091	hypothetical protein	0.984	0.0515	0.0082	0.159223	10.4928
Cpro.40079	hypothetical protein	Chro.40092	hypothetical protein	0.95	0.0562	0.0216	0.384342	4.3009
Cpro.40080	thioredoxin peroxidase	Chro.40093	thioredoxin peroxidase	1	0.0342	0	0	4.6
Cpro.40081	serine proteinase inhibitor	Chro.40094	hypothetical protein	0.985	0.0469	0.0064	0.136461	15.2938
Cpro.40082	anti-silencing factor 1 CG9383-PA	Chro.40095	asf1	0.995	0.0606	0.0021	0.0346535	4.6
Cpro.40083	hypothetical protein	Chro.60041	hypothetical protein	0.253	3.61	0.7175	0.198753	1.0182
Cpro.40084	DNA topoisomerase II, putative	Chro.40097	DNA topoisomerase II	0.964	0.0776	0.0094	0.121134	5.042
Cpro.40085	hypothetical protein	Chro.40098	hypothetical protein	1	0	0	None	4.6
Cpro.40086	CG12404-PA	Chro.40099	CG12404-PA	0.995	0.0298	0.0022	0.0738255	4.6
Cpro.40087	UDP-N-acetylglucosamine pyrophosphorylase; Qri1p	Chro.40100	UDP-N-acetylglucosamine pyrophosphorylase\; Qri1p	0.957	0.116	0.012	0.103448	9.6559
Cpro.40088	Cstf1-prov protein	Chro.40101	Cstf1-prov protein	0.975	0.0475	0.0094	0.197895	2.0822
Cpro.40089	hypothetical protein	Chro.40102	hypothetical protein	0.975	0.057	0.0102	0.178947	13.359
Cpro.40090	Ribosomal protein L24e, putative	Chro.40103	ribosomal protein L24e	1	0.029	0	0	4.6
Cpro.40091	hypothetical protein	Chro.40104	hypothetical protein	0.966	0.0594	0.014	0.23569	6.583
Cpro.40092	hypothetical protein	Chro.40105	hypothetical protein	0.957	0.0532	0.0184	0.345865	8.693
Cpro.40093	hypothetical protein	Chro.40106	hypothetical protein	0.977	0.0592	0.0097	0.163851	4.715
Cpro.40094	hypothetical protein - Arabidopsis thaliana gi|2244998|emb|CAB10418.1| transcriptional adaptor like protein	Chro.40107	ADA2-like protein	0.988	0.0767	0.0043	0.0560626	2.0567
Cpro.40095	similar to Arabidopsis thaliana (Mouse-ear cress). WD40-repeat protein	Chro.40109	similar to transducin beta-like 3\; WD-repeat protein SAZD	0.983	0.0973	0.0051	0.0524152	2.6905
Cpro.40096	acid phosphatase-1	Chro.40110	hypothetical protein	0.973	0.1335	0.0105	0.0786517	6.7978
Cpro.40097	hypothetical protein	Chro.40111	hypothetical protein	0.777	0.7157	0.1159	0.161939	5.7261
Cpro.40098	poly(A) polymerase PAP, putative	Chro.40112	hypothetical protein	0.968	0.1114	0.0073	0.0655296	2.2515
Cpro.40099	hypothetical protein	Chro.40113	hypothetical protein	0.983	0.0335	0.0072	0.214925	12.5927
Cpro.40100	will die slowly CG17437-PA	Chro.40114	will die slowly CG17437-PA	0.978	0.0667	0.0093	0.13943	5.3833
Cpro.40101	unnamed protein product	Chro.40115	hypothetical protein	0.986	0.0485	0.006	0.123711	4.6
Cpro.40102	minichromosome maintenance protein mcm7p	Chro.40117	minichromosome maintenance protein mcm7p	0.987	0.0637	0.0054	0.0847724	5.4629
Cpro.40103	hypothetical protein	Chro.40118	hypothetical protein	0.98	0.0512	0.0088	0.171875	5.3497
Cpro.40104	receptor-related serine threonine kinase	Chro.40119	hypothetical protein	0.884	0.2023	0.0611	0.302027	2.4166
Cpro.40106	hypothetical protein	Chro.40121	hypothetical protein	0.947	0.0732	0.0204	0.278689	4.6
Cpro.40107	hypothetical protein	Chro.40122	hypothetical protein	0.901	0.1248	0.0212	0.169872	6.9876
Cpro.40108	eukaryotic translation initiation factor, putative	Chro.40123	eukaryotic translation initiation factor	0.989	0.085	0.0044	0.0517647	8.1984
Cpro.40109	hypothetical protein	Chro.40124	hypothetical protein	0.987	0.1173	0.0051	0.0434783	11.3814
Cpro.40111	MYND finger domain protein	Chro.40126	MYND finger domain protein	0.992	0.0154	0.0033	0.214286	4.6
Cpro.40112	protein disulphide isomerase	Chro.40127	protein disulphide isomerase	1	0.0637	0	0	19.1554
Cpro.40113	hypothetical protein	Chro.40128	hypothetical protein	0.977	0.0678	0.0096	0.141593	7.6517
Cpro.40114	hypothetical protein	Chro.40129	hypothetical protein	0.959	0.0668	0.0168	0.251497	12.3683
Cpro.40116	hypothetical protein	Chro.40131	hypothetical protein	0.955	0.0579	0.0155	0.267703	12.9794
Cpro.40117	hypothetical protein	Chro.40132	hypothetical protein	0.969	0.075	0.0147	0.196	3.025
Cpro.40119	hypothetical protein	Chro.40135	hypothetical protein	0.956	0.0909	0.0183	0.20132	1.9877
Cpro.40120	hypothetical protein	Chro.40136	hypothetical protein	0.988	0.0276	0.0049	0.177536	4.6
Cpro.40121	expressed protein	Chro.40137	hypothetical protein	0.98	0.0744	0.0094	0.126344	7.5759
Cpro.40122	26S proteasome AAA-ATPase subunit RPT2a	Chro.40138	26S proteasome AAA-ATPase subunit RPT2a	1	0.0879	0	0	4.6
Cpro.40123	hypothetical protein	Chro.40139	hypothetical protein	0.973	0.0137	0.0118	0.861314	4.6
Cpro.40124	hypothetical protein	Chro.40140	hypothetical protein	1	0.0429	0	0	4.6
Cpro.40125	ubiquitin fusion degradation (UFD) protein, putative	Chro.40141	hypothetical protein	0.993	0.0851	0.003	0.0352526	4.6
Cpro.40126	transcription or splicing factor-like protein, putative	Chro.40142	transcription or splicing factor-like protein	0.979	0.0634	0.0081	0.12776	10.4275
Cpro.40127	similar to Mus musculus (Mouse). Ribosome biogenesis regulatory protein homolog	Chro.40143	hypothetical protein	0.977	0.0999	0.0113	0.113113	8.2377
Cpro.40128	60S ribosomal protein L28 gi|11245768|gb|AAG32533.1| ribosomal protein L28	Chro.40144	60S ribosomal protein L28	0.976	0.0084	0.0116	1.38095	4.6
Cpro.40129	hypothetical protein	Chro.40145	hypothetical protein	0.952	0.0686	0.0252	0.367347	19.538
Cpro.40130	hypothetical protein	Chro.40146	possible tRNA-INTRON ENDONUCLEASE	0.967	0.0886	0.0128	0.14447	4.6
Cpro.40131	hypothetical protein	Chro.40147	hypothetical protein	0.978	0.068	0.0091	0.133824	33.1969
Cpro.40132	hypothetical protein	Chro.40148	hypothetical protein	0.906	0.4236	0.0447	0.105524	0.6032
Cpro.40133	hypothetical protein	Chro.40149	hypothetical protein	0.712	0.2243	0.0825	0.367811	4.0122
Cpro.40134	hypothetical protein	Chro.40150	hypothetical protein	0.97	0.0795	0.0118	0.148428	6.2731
Cpro.40135	hypothetical protein	Chro.40151	hypothetical protein	0.984	0.0793	0.0064	0.0807062	8.8658
Cpro.40137	hypothetical protein with bromodomain	Chro.40153	hypothetical protein	0.661	0.4794	0.1871	0.39028	1.0752
Cpro.40138	Regulator of chromosome condensation, putative	Chro.40154	regulator of chromosome condensation	0.899	0.0651	0.0198	0.304147	4.047
Cpro.40139	hypothetical protein C0740c - malaria parasite (Plasmodium falciparum)	Chro.40155	C0740c	0.974	0.0731	0.0092	0.125855	11.5735
Cpro.40140	ABC transporter, putative	Chro.40156	hypothetical protein	0.977	0.0796	0.0104	0.130653	4.9093
Cpro.40141	ABC multidrug or ion efflux transporter	Chro.40157	ABC multidrug or ion efflux transporter	0.977	0.0733	0.0106	0.144611	9.8359
Cpro.40142	glutathione-conjugate transporter AtMRP4	Chro.40158	ATP-binding cassette protein 1	0.974	0.0548	0.0114	0.208029	7.5015
Cpro.40143	inorganic pyrophosphatase - like protein	Chro.40159	inorganic pyrophosphatase precursor	0.992	0.1369	0.0033	0.0241052	2.8176
Cpro.40144	hypothetical protein	Chro.40160	hypothetical protein	0.987	0.0734	0.0055	0.0749319	4.6
Cpro.40146	hypothetical protein	Chro.40162	hypothetical protein	0.97	0.0469	0.0082	0.17484	9.8812
Cpro.40147	hypothetical protein	Chro.40163	hypothetical protein	0.966	0.0514	0.0136	0.264591	4.6
Cpro.40148	hypothetical protein	Chro.40164	hypothetical protein	0.982	0.0502	0.0085	0.169323	9.5117
Cpro.40149	hypothetical protein	Chro.40165	hypothetical protein	0.953	0.0775	0.0106	0.136774	16.7105
Cpro.40150	hypothetical protein	Chro.40166	hypothetical protein	0.986	0.0623	0.0059	0.094703	4.6
Cpro.40151	vacuolar proton translocating ATPase 116 kDa subunit a isoform 1	Chro.40167	vacuolar proton translocating ATPase 116 kDa subunit a isoform 1	0.997	0.0317	0.001	0.0315457	14.2052
Cpro.40152	hypothetical protein	Chro.40169	hypothetical protein	0.992	0.0435	0.0033	0.0758621	4.6
Cpro.40153	small subunit DNA primase	Chro.40170	small subunit DNA primase	0.995	0.02	0.0019	0.095	4.6
Cpro.40156	ENSANGP00000021112	Chro.40174	ENSANGP00000021112	0.963	0.06	0.0122	0.203333	14.5944
Cpro.40157	hypothetical protein	Chro.40175	hypothetical protein	0.96	0.07	0.0126	0.18	5.3488
Cpro.40159	hypothetical serine-rich repeat protein	Chro.40177	hypothetical protein	1	0.1139	0	0	4.6
Cpro.40160	hypothetical protein	Chro.40178	hypothetical protein	1	0.0653	0	0	4.6
Cpro.40161	hypothetical protein	Chro.40179	hypothetical protein	0.953	0.0523	0.0157	0.300191	11.1774
Cpro.40163	methyltransferase, putative	Chro.40181	FtsJ cell division protein	0.992	0.0566	0.0036	0.0636042	18.5702
Cpro.40164	RIKEN cDNA A730019I05 gene	Chro.40182	RIKEN cDNA A730019I05 gene	0.974	0.0687	0.011	0.160116	21.481
Cpro.40165	GYF domain, putative	Chro.40183	hypothetical protein	0.971	0.0768	0.0128	0.166667	3.4986
Cpro.40166	protein kinase, putative	Chro.40184	hypothetical protein	0.938	0.1426	0.0226	0.158485	3.191
Cpro.40167	hypothetical protein	Chro.40185	hypothetical protein	0.98	0.0295	0.0091	0.308475	4.6
Cpro.40168	hypothetical protein	Chro.40186	hypothetical protein	0.984	0.0342	0.0066	0.192982	4.6
Cpro.40169	hypothetical protein	Chro.40187	hypothetical protein	0.931	0.0742	0.0157	0.21159	12.2046
Cpro.40170	thioredoxin; Trx1p	Chro.40188	thioredoxin\; Trx1p	0.986	0.1528	0.0067	0.0438482	7.332
Cpro.40171	hypothetical protein	Chro.40189	hypothetical protein	0.899	0.137	0.0276	0.20146	11.6974
Cpro.40172	hypothetical protein AN7182.2	Chro.40190	hypothetical protein	0.976	0.0827	0.0087	0.1052	3.479
Cpro.40173	putative myosin heavy chain	Chro.40191	hypothetical protein	0.746	0.2497	0.0289	0.115739	4.6
Cpro.40174	putative GTP-binding protein	Chro.40193	hypothetical protein	0.995	0.0687	0.0019	0.0276565	4.6
Cpro.40175	hypothetical protein	Chro.40194	hypothetical protein	0.97	0.0482	0.0121	0.251037	4.7891
Cpro.40176	CCAAT-box DNA binding protein subunit B	Chro.40195	CCAAT-box DNA binding protein subunit B	0.983	0.0576	0.0068	0.118056	5.4723
Cpro.40177	cell division control protein 48, AAA family (cdc48-1)	Chro.40196	ATPases of the AAA+ class	0.983	0.0614	0.0055	0.0895765	7.4859
Cpro.40181	hypothetical protein	Chro.40200	hypothetical protein	0.97	0.0366	0.0116	0.31694	10.3488
Cpro.40182	hypothetical protein	Chro.40201	hypothetical protein	0.996	0.0715	0.0017	0.0237762	2.6768
Cpro.40184	hypothetical protein	Chro.40203	hypothetical protein	0.975	0.0304	0.0071	0.233553	9.4949
Cpro.40185	hypothetical protein	Chro.40204	hypothetical protein	0.986	0.0642	0.0059	0.0919003	3.7663
Cpro.40186	hypothetical protein	Chro.40205	hypothetical protein	0.99	0.0679	0.0041	0.0603829	3.5252
Cpro.40187	dynein light chain Tctex1 - Chlamydomonas reinhardtii gi|3170164|gb|AAC18035.1| dynein light chain Tctex1	Chro.40206	dynein light chain Tctex1	1	0.0954	0	0	2.6857
Cpro.40188	CG8611-PB	Chro.40207	CG8611-PB	0.99	0.064	0.004	0.0625	3.5327
Cpro.40189	hypothetical protein C0850c - malaria parasite (Plasmodium falciparum)	Chro.40208	C0850c	0.979	0.0643	0.009	0.139969	5.7828
Cpro.40190	hypothetical protein	Chro.40209	hypothetical protein	0.979	0.0539	0.0093	0.172542	6.7874
Cpro.40191	hypothetical protein	Chro.40210	hypothetical protein	0.973	0.0366	0.0115	0.314208	4.6
Cpro.40192	hypothetical protein	Chro.40212	hypothetical protein	0.98	0.069	0.008	0.115942	6.593
Cpro.40193	AMP deaminase homolog	Chro.40214	AMP deaminase	0.993	0.054	0.003	0.0555556	4.6982
Cpro.40194	hypothetical protein	Chro.40215	hypothetical protein	0.951	0.0189	0.0221	1.16931	9.077
Cpro.40195	expressed protein	Chro.40216	hypothetical protein	0.99	0.0515	0.0051	0.0990291	7.6406
Cpro.40196	hypothetical protein	Chro.40217	hypothetical protein	0.992	0.0371	0.0035	0.0943396	9.1398
Cpro.40197	origin recognition complex protein	Chro.40218	origin recognition complex protein	0.986	0.0578	0.0067	0.115917	7.6822
Cpro.40198	putative nucleoside diphosphate kinase	Chro.40219	nucleoside diphosphate kinase	0.993	0.0424	0.003	0.0707547	4.6
Cpro.40199	expressed protein	Chro.40220	hypothetical protein	0.967	0.0824	0.0148	0.179612	3.959
Cpro.40200	Hypothetical protein CBG11977	Chro.40221	hypothetical protein	0.969	0.0858	0.0136	0.158508	8.5362
Cpro.40201	hypothetical protein	Chro.40222	hypothetical protein	0.957	0.1215	0.0037	0.0304527	1.3472
Cpro.40202	plant adhesion molecule -related	Chro.40223	hypothetical protein	0.986	0.068	0.0057	0.0838235	2.0433
Cpro.40203	NNP-1/Nop52, novel nuclear protein 1	Chro.40224	NNP-1/Nop52, novel nuclear protein 1	0.972	0.0299	0.0142	0.474916	23.6296
Cpro.40204	hypothetical protein	Chro.40225	CP15/60	0.955	0.0241	0.0208	0.863071	14.8729
Cpro.40205	similar to unknown protein; protein id: At3g22590.1, supported by cDNA: gi_17529301	Chro.40226	similar to \; protein id: At3g22590.1, supported by cDNA: gi_17529301	0.975	0.0822	0.0111	0.135036	3.6815
Cpro.40206	hypothetical protein MG03859.4	Chro.40227	hypothetical protein	0.991	0.0702	0.0033	0.0470085	15.3756
Cpro.40207	hypothetical protein	Chro.40229	hypothetical protein	0.987	0.0847	0.0059	0.0696576	6.2161
Cpro.40208	235 kDa rhoptry protein	Chro.40230	235 kDa rhoptry protein	0.969	0.0728	0.0129	0.177198	5.1563
Cpro.40209	hypothetical protein	Chro.40231	hypothetical protein	0.98	0.0887	0.0087	0.0980834	4.6
Cpro.40210	Ycf2	Chro.40232	hypothetical protein	0.97	0.0735	0.013	0.176871	5.1015
Cpro.40211	unnamed protein product	Chro.40233	hypothetical protein	0.985	0.0524	0.0063	0.120229	4.409
Cpro.40212	hypothetical protein	Chro.40234	hypothetical protein	0.983	0.061	0.0078	0.127869	15.6238
Cpro.40213	hypothetical protein	Chro.40235	hypothetical protein	0.931	0.0268	0.0334	1.24627	4.6
Cpro.40214	n-acetylglucosaminyl-phosphatidylinositol biosynthetic protein, putative	Chro.40236	n-acetylglucosaminyl-phosphatidylinositol biosynthetic protein	0.989	0.0818	0.0049	0.0599022	9.1755
Cpro.40215	hypothetical protein	Chro.40238	hypothetical protein	0.975	0.0548	0.0101	0.184307	1.8477
Cpro.40216	preprocathepsin c precursor, putative	Chro.40239	preprocathepsin c precursor	0.983	0.0487	0.0077	0.158111	13.2858
Cpro.40217	hypothetical protein	Chro.40240	hypothetical protein	0.978	0.0523	0.0096	0.183556	5.4258
Cpro.40218	hypothetical protein	Chro.40241	hypothetical protein	0.991	0.0485	0.004	0.0824742	9.3338
Cpro.40220	hypothetical protein	Chro.40243	hypothetical protein	0.99	0.0751	0.0045	0.0599201	42.4403
Cpro.40221	hypothetical protein	Chro.40244	hypothetical protein	0.963	0.0395	0.0171	0.432911	7.7384
Cpro.40222	similar to Ribonuclease HI large subunit (RNase HI large subunit)	Chro.40245	similar to ribonuclease HI large subunit (RNase HI large subunit)	0.979	0.0612	0.0083	0.135621	1.911
Cpro.40223	ribonuclease H1 large subunit, putative	Chro.40246	ribonuclease H1 large subunit	0.963	0.0672	0.0168	0.25	4.6
Cpro.40224	hypothetical protein	Chro.40247	hypothetical protein	0.963	0.07	0.018	0.257143	4.0977
Cpro.40225	hypothetical protein	Chro.40248	hypothetical protein	0.945	0.0451	0.0248	0.549889	6.8084
Cpro.40226	aspartyl protease-like	Chro.40249	hypothetical protein	0.945	0.0336	0.0268	0.797619	7.2999
Cpro.40227	SMC2 protein	Chro.40250	SMC2 protein	0.977	0.0623	0.0102	0.163724	4.6082
Cpro.40228	epsilon-adaptin, putative-related	Chro.40252	hypothetical protein	0.939	0.0577	0.0267	0.462738	5.7244
Cpro.40229	apoptosis-related protein	Chro.40253	apoptosis-related protein	0.977	0.0734	0.01	0.13624	4.6
Cpro.40230	hypothetical protein	Chro.40254	hypothetical protein	0.985	0.0829	0.0063	0.0759952	5.2605
Cpro.40231	hypothetical protein	Chro.40255	hypothetical protein	0.964	0.047	0.0162	0.344681	9.8166
Cpro.40232	ENSANGP00000013327	Chro.40256	ENSANGP00000013327	0.974	0.068	0.0117	0.172059	9.7244
Cpro.40233	ribosomal P protein	Chro.40257	ribosomal P protein	0.994	0.0491	0.0031	0.0631365	22.7169
Cpro.40234	oxidoreductase, short-chain dehydrogenase family, putative	Chro.40258	ENSANGP00000010899	0.966	0.0671	0.0163	0.242921	19.6316
Cpro.40235	hypothetical protein	Chro.40259	hypothetical protein	0.984	0.0641	0.0068	0.106084	4.8349
Cpro.40236	Ubiquitin-activating enzyme E1 2 gi|170684|gb|AAA34265.1| ubiquitin activating enyme	Chro.40260	ubiquitin-activating enzyme e1	0.99	0.0817	0.0051	0.0624235	8.0871
Cpro.40237	hypothetical protein	Chro.40261	hypothetical protein	0.943	0.0415	0.0247	0.595181	2.9924
Cpro.40238	Arabidopsis thaliana At3g18860/MCB22_3	Chro.40262	At3g18860/MCB22_3	0.972	0.0758	0.0115	0.151715	2.4632
Cpro.40239	hypothetical protein	Chro.40263	hypothetical protein	0.971	0.1163	0.0127	0.1092	4.6
Cpro.40240	hypothetical protein	Chro.40264	hypothetical protein	0.973	0.0465	0.012	0.258065	6.501
Cpro.40241	hypothetical protein	Chro.40265	hypothetical protein	0.852	0.2915	0.0949	0.325557	0.4936
Cpro.40242	Required with RAD23 for duplication of the spindle pole body; Dsk2p	Chro.40266	required with RAD23 for duplication of the spindle pole body\; Dsk2p	0.963	0.097	0.0149	0.153608	9.6016
Cpro.40243	Kars protein	Chro.40267	Kars protein	0.996	0.051	0.0017	0.0333333	7.0268
Cpro.40244	hypothetical protein	Chro.40268	hypothetical protein	0.98	0.0421	0.009	0.213777	6.212
Cpro.40245	Drosophila melanogaster CG11926 gene product, putative	Chro.40269	CG11926 gene product	0.972	0.0458	0.0148	0.323144	9.2967
Cpro.40246	putative vacuolar sorting protein 35	Chro.40270	vacuolar sorting protein 35	0.993	0.0445	0.0035	0.0786517	11.5382
Cpro.40247	hypothetical protein	Chro.40271	hypothetical protein	0.955	0.0711	0.0189	0.265823	7.2554
Cpro.40248	Chain A, 4ank: A Designed Ankyrin Repeat Protein With Four Identical Consensus Repeats	Chro.40272	Chain A, 4ank	0.978	0.062	0.0093	0.15	23.598
Cpro.40249	similar to Plasmodium falciparum (isolate 3D7). Hypothetical protein	Chro.40273	hypothetical protein	0.954	0.0908	0.0176	0.193833	2.7185
Cpro.40250	hypothetical protein	Chro.40274	hypothetical protein	0.985	0.0667	0.0085	0.127436	5.2828
Cpro.40251	similar to RIKEN cDNA 2810055C19	Chro.40275	similar to RIKEN cDNA 2810055C19	0.959	0.0429	0.0224	0.522145	10.8395
Cpro.40252	hypothetical protein	Chro.40276	hypothetical protein	0.977	0.0836	0.0106	0.126794	10.1841
Cpro.40253	hypothetical protein	Chro.40277	hypothetical protein	0.97	0.0836	0.0134	0.160287	3.5675
Cpro.40254	hypothetical protein	Chro.40278	hypothetical protein	0.97	0.1362	0.0135	0.0991189	7.1033
Cpro.40255	hypothetical protein	Chro.40279	hypothetical protein	0.983	0.0798	0.0079	0.0989975	2.3962
Cpro.40256	hypothetical protein	Chro.40280	hypothetical protein	0.956	0.0797	0.02	0.250941	12.1676
Cpro.40257	hypothetical protein	Chro.40281	hypothetical protein	0.877	0.0556	0.0583	1.04856	8.4386
Cpro.40258	hypothetical protein	Chro.40282	hypothetical protein	0.934	0.0503	0.0295	0.586481	26.0576
Cpro.40259	hypothetical protein	Chro.40283	hypothetical protein	0.952	0.0965	0.0204	0.211399	1.6794
Cpro.40260	26S proteasome AAA-ATPase subunit RPT3	Chro.40284	26S proteasome AAA-ATPase subunit RPT3	0.99	0.0487	0.0043	0.0882957	7.175
Cpro.40261	putative farnesyl pyrophosphate synthase	Chro.40285	farnesyl pyrophosphate synthase	0.983	0.0596	0.0076	0.127517	8.2151
Cpro.40262	hypothetical protein	Chro.40286	hypothetical protein	0.973	0.1059	0.012	0.113314	6.0564
Cpro.40264	Similar to phospholipase C, delta	Chro.40288	phospholipase C, delta	0.985	0.0488	0.0061	0.125	20.7924
Cpro.40265	Involved in Processing ITS2; Ynl182cp	Chro.40289	Involved in Processing ITS2\; Ynl182cp	0.966	0.0636	0.015	0.235849	9.0753
Cpro.40266	oxysterol binding protein-like 1A	Chro.40290	RIKEN cDNA C130070J12 gene	0.983	0.0477	0.0078	0.163522	21.1427
Cpro.40267	glycerophosphodiester phosphodiesterase -related	Chro.40291	glycerophosphodiester phosphodiesterase -related	0.974	0.0611	0.0123	0.201309	2.9703
Cpro.40268	UDP-glucose 4-epimerase	Chro.40292	UDP-glucose 4-epimerase	0.994	0.0686	0.0025	0.0364431	6.52
Cpro.40269	hypothetical protein	Chro.40293	hypothetical protein	0.991	0.0479	0.0038	0.0793319	4.6
Cpro.40270	hypothetical protein	Chro.40294	hypothetical protein	0.941	0.0531	0.0264	0.497175	27.1076
Cpro.40271	hypothetical protein	Chro.40295	hypothetical protein	0.962	0.0488	0.0166	0.340164	5.7993
Cpro.40272	hypothetical protein	Chro.40296	hypothetical protein	0.952	0.0707	0.0229	0.323904	9.124
Cpro.40273	hypothetical protein	Chro.40297	hypothetical protein	0.987	0.0622	0.0053	0.085209	5.0943
Cpro.40274	Similar to hypothetical protein MGC13096	Chro.40298	MGC13096	0.964	0.0578	0.0152	0.262976	8.5428
Cpro.40275	ataxia telangiectasia and Rad3-related protein	Chro.40301	ataxia telangiectasia and Rad3-related protein	0.989	0.0614	0.0047	0.0765472	10.198
Cpro.40276	CG3814-PA	Chro.40302	N-methyl-D-aspartate receptor-associated protein CG3798-PC	0.976	0.0267	0.0109	0.40824	4.6
Cpro.40277	component of a complex guanine nucleotide exchange activity for the ADP-ribosylation factor ARF; Gea1p	Chro.40303	hypothetical protein	0.99	0.0673	0.0032	0.0475483	5.1634
Cpro.40278	Nitric-oxide synthase (NOS) gi|7522082|pir||T31331 nitric-oxide synthase (EC 1.14.13.39) - Anopheles stephensi gi|3790537|gb|AAC68577.1| nitric oxide synthase	Chro.40304	Nitric-oxide synthase (NOS)	0.974	0.0527	0.0118	0.223909	13.4368
Cpro.40279	ENSANGP00000016613	Chro.40305	ENSANGP00000016613	1	0.1208	0	0	4.6
Cpro.40280	ATPase homolog - Cryptosporidium parvum gi|1513210|gb|AAC47833.1| P-ATPase	Chro.40306	ATPase	0.986	0.071	0.0062	0.0873239	10.4817
Cpro.40281	hypothetical protein	Chro.40307	interaptin	0.971	0.0604	0.0132	0.218543	6.8755
Cpro.40282	putative U3 snoRNP protein IMP4	Chro.40308	U3 snoRNP protein IMP4	0.965	0.045	0.0155	0.344444	9.3702
Cpro.40283	hypothetical protein	Chro.40309	hypothetical protein	0.977	0.0771	0.0103	0.133593	9.7693
Cpro.40284	hypothetical protein	Chro.40310	hypothetical protein	0.955	0.0686	0.02	0.291545	4.6
Cpro.40286	hypothetical protein	Chro.40312	hypothetical protein	0.978	0.0695	0.0107	0.153957	6.5847
Cpro.40287	DNAJ domain protein, putative	Chro.40313	DnaJ	0.986	0.0699	0.0062	0.0886981	13.9582
Cpro.40288	ethanolaminephosphotransferase, putative	Chro.40314	ethanolaminephosphotransferase	0.967	0.0546	0.0159	0.291209	7.5032
Cpro.40289	hypothetical protein	Chro.40315	hypothetical protein	0.987	0.0593	0.0059	0.0994941	6.3065
Cpro.40290	hypothetical protein	Chro.40316	hypothetical protein	0.979	0.0402	0.0093	0.231343	16.9076
Cpro.40291	hypothetical protein	Chro.40317	hypothetical protein	0.945	0.0515	0.0249	0.483495	5.2021
Cpro.40293	ribosome biogenesis protein nep1 homologue, putative	Chro.40319	ribosome biogenesis protein nep1	0.983	0.0304	0.0076	0.25	4.1088
Cpro.40294	hypothetical protein	Chro.40320	hypothetical protein	0.978	0.054	0.0103	0.190741	7.2977
Cpro.40295	hypothetical protein	Chro.40321	hypothetical protein	0.931	0.0397	0.0394	0.992443	9.6267
Cpro.40296	alpha-tubulin	Chro.40322	alpha-tubulin	1	0.0743	0	0	22.781
Cpro.40297	putative sugar transporter	Chro.40323	facilitative hexose transporter	0.953	0.0651	0.0271	0.416283	1.9098
Cpro.40298	chromosome assembly protein homolog	Chro.40324	chromosome assembly protein	0.979	0.0543	0.0094	0.173112	5.9367
Cpro.40299	hypothetical protein	Chro.40325	hypothetical protein	0.957	0.0283	0.0203	0.717314	4.9178
Cpro.40300	polyketide synthase	Chro.40900	polyketide synthase	0.97	0.0669	0.013	0.19432	6.5928
Cpro.40301	aminopeptidase	Chro.40331	aminopeptidase	0.981	0.0564	0.0085	0.150709	9.1403
Cpro.40302	hypothetical protein	Chro.40332	hypothetical protein	0.981	0.0341	0.0084	0.246334	4.7586
Cpro.40303	ARE1-like protein, 78992-73047	Chro.40334	Vps52 / Sac2 family protein	0.95	0.0497	0.0235	0.472837	13.2745
Cpro.40304	hypothetical protein	Chro.40336	hypothetical protein	0.986	0.0547	0.006	0.109689	6.3873
Cpro.40305	DNA repair endonuclease subunit	Chro.40337	repair endonuclease (gb|AAF01274.1)	0.982	0.0596	0.0081	0.135906	11.194
Cpro.40306	UV endonuclease; Rad1p	Chro.40338	UV endonuclease\; Rad1p	0.97	0.0258	0.0128	0.496124	13.9182
Cpro.40307	rhoGAP protein	Chro.40339	rhoGAP protein	0.976	0.0553	0.0042	0.0759494	6.0403
Cpro.40308	putative glycosyl transferase	Chro.40340	glycosyl transferase	0.969	0.0495	0.0155	0.313131	10.3712
Cpro.40309	DEAD box polypeptide, Y chromosome-related	Chro.40341	DEAD box polypeptide, Y chromosome-related	0.99	0.0681	0.0044	0.0646109	4.1031
Cpro.40310	hypothetical protein	Chro.40342	hypothetical protein	0.977	0.0572	0.0109	0.190559	4.6
Cpro.40311	COG1196: Chromosome segregation ATPases	Chro.40343	COG1196: chromosome segregation ATPases	0.967	0.0453	0.0144	0.317881	5.6547
Cpro.40312	hypothetical protein	Chro.40344	hypothetical protein	0.966	0.0382	0.0172	0.450262	10.7883
Cpro.40313	hypothetical protein	Chro.40345	hypothetical protein	0.97	0.0742	0.0134	0.180593	5.1286
Cpro.40314	NifS-like protein	Chro.40346	NifS-like protein	0.998	0.0922	0.001	0.010846	10.2554
Cpro.40315	hypothetical protein	Chro.40347	hypothetical protein	0.956	0.1051	0.0206	0.196004	6.1005
Cpro.40316	hypothetical protein	Chro.40349	hypothetical protein	0.972	0.0391	0.0138	0.352941	8.2988
Cpro.40317	40s ribosomal protein S27a	Chro.40350	ubiquitin	0.974	0.0553	0.012	0.216998	4.598
Cpro.40318	oocyst wall protein 6 precursor	Chro.40351	oocyst wall protein 6 precursor	0.993	0.0856	0.0033	0.0385514	7.904
Cpro.40319	Dictyostelium discoideum SgcA	Chro.40352	SgcA	0.991	0.0669	0.0036	0.0538117	3.6193
Cpro.40321	similar to GDP-fucose transporter 1; multispan transmembrane protein fuct1	Chro.40354	GDP-fucose transporter 1	0.973	0.0656	0.0119	0.181402	7.5781
Cpro.40323	dolichyl-P-Glc:Man9GlcNAc2-PP-dolichylglucosyltransferase; Man(9)GlcNAc(2)-PP-Dol alpha-1,3-glucosyltransferase; asparagine-linked glycosylation 6 homolog (yeast, alpha-1,3,-glucosyltransferase)	Chro.40356	glucosyltransferase	0.97	0.0355	0.0137	0.385915	8.1218
Cpro.40324	eukaryotic translation initiation factor 6-like protein	Chro.40357	eukaryotic translation initiation factor 6-like protein	0.996	0.0856	0.0017	0.0198598	2.1321
Cpro.40325	ENSANGP00000010898	Chro.40358	ENSANGP00000010898	0.974	0.0579	0.0123	0.212435	11.5686
Cpro.40326	cullin 1 protein -related	Chro.40359	cullin 1 protein -related	0.971	0.0488	0.0143	0.293033	8.6032
Cpro.40327	40S ribosomal protein S3A, putative	Chro.40360	40S ribosomal protein S3A	0.992	0.061	0.0034	0.0557377	4.6
Cpro.40328	hypothetical protein	Chro.40361	hypothetical protein	0.974	0.0712	0.0106	0.148876	2.0782
Cpro.40329	DEAD box protein	Chro.40362	DEAD box protein	0.986	0.0446	0.0063	0.141256	10.6073
Cpro.40330	small nuclear ribonucleoprotein, putative	Chro.40363	small nuclear ribonucleoprotein	1	0.0863	0	0	4.6
Cpro.40331	hypothetical protein	Chro.40364	hypothetical protein	0.98	0.082	0.0093	0.113415	4.6
Cpro.40332	hypothetical protein	Chro.40365	hypothetical protein	0.978	0.0658	0.0101	0.153495	4.9935
Cpro.40333	H3 histone, family 2; histone 2, H3ca1	Chro.40366	H3 histone, family 2\; histone 2, H3ca1	1	0.03	0	0	4.6
Cpro.40334	hypothetical protein	Chro.40367	hypothetical protein	0.991	0.0475	0.0038	0.08	9.6945
Cpro.40335	ENSANGP00000011443	Chro.40368	ENSANGP00000011443	0.98	0.057	0.0091	0.159649	12.0529
Cpro.40336	N2,N2-dimethylguanosine tRNA methyltransferase	Chro.40369	ENSANGP00000010185	0.974	0.0941	0.011	0.116897	3.7192
Cpro.40337	heat shock 105kD; heat shock 105kD alpha; heat shock 105kD beta; heat shock 105kDa protein 1	Chro.40370	heat shock 105kD\; heat shock 105kD alpha\; heat shock 105kD beta\; heat shock 105kDa protein 1	0.996	0.0485	0.0017	0.0350515	7.5908
Cpro.40338	hypothetical protein	Chro.40371	hypothetical protein	0.963	0.0677	0.0154	0.227474	4.6693
Cpro.40339	membrane skeletal protein IMC1	Chro.40372	membrane skeletal protein IMC1	1	0.0349	0	0	3.6185
Cpro.40340	hypothetical protein	Chro.40373	hypothetical protein	1	0.0444	0	0	4.6
Cpro.40341	phosphoacetylglucosamine mutase	Chro.40374	hypothetical protein	0.969	0.0548	0.0139	0.25365	6.3379
Cpro.40342	hypothetical protein	Chro.40375	hypothetical protein	0.957	0.0308	0.0194	0.62987	4.6
Cpro.40343	hypothetical protein	Chro.40376	hypothetical protein	0.977	0.0642	0.0102	0.158879	10.9222
Cpro.40344	hypothetical protein	Chro.40377	hypothetical protein	0.995	0.0575	0.0022	0.0382609	6.0465
Cpro.40345	hypothetical protein	Chro.40378	41 Kd oocyst wall protein	0.985	0.0718	0.0062	0.086351	1.9553
Cpro.40346	hypothetical protein	Chro.40379	hypothetical protein	0.995	0.0432	0.0023	0.0532407	7.5324
Cpro.40347	hypothetical protein	Chro.40380	hypothetical protein	0.972	0.0286	0.0159	0.555944	4.6
Cpro.40348	hypothetical protein	Chro.40381	hypothetical protein	0.918	0.097	0.0337	0.347423	3.06
Cpro.40349	Unknown (protein for MGC:76117)	Chro.40382	hypothetical protein	0.983	0.0806	0.0072	0.08933	3.9202
Cpro.40350	hypothetical protein	Chro.40383	hypothetical protein	0.97	0.0417	0.0135	0.323741	7.6919
Cpro.40351	hypothetical protein	Chro.40384	hypothetical protein	0.963	0.091	0.0155	0.17033	4.4379
Cpro.40352	hypothetical protein	Chro.40385	hypothetical protein	0.983	0.0629	0.008	0.127186	3.9092
Cpro.40353	long chain fatty acid synthetase	Chro.40386	long chain fatty acid synthetase	0.984	0.0526	0.0075	0.142586	6.7194
Cpro.40354	hypothetical protein	Chro.40387	RNA binding protein	0.974	0.0542	0.0095	0.175277	6.1342
Cpro.40356	ENSANGP00000011444	Chro.40389	ENSANGP00000011444	0.976	0.0344	0.0103	0.299419	4.5157
Cpro.40357	putative	Chro.40391	hypothetical protein	0.973	0.0742	0.0103	0.138814	9.6213
Cpro.40358	hypothetical protein	Chro.40392	hypothetical protein	0.979	0.0409	0.0091	0.222494	9.644
Cpro.40359	hypothetical protein	Chro.40393	hypothetical protein	0.985	0.0393	0.0076	0.193384	14.3282
Cpro.40360	hypothetical protein	Chro.40395	hypothetical protein	0.924	0.0832	0.0329	0.395433	11.8963
Cpro.40361	hypothetical protein	Chro.40396	hypothetical protein	0.955	0.0512	0.0195	0.380859	9.744
Cpro.40362	hypothetical protein	Chro.40397	hypothetical protein	0.965	0.0615	0.0141	0.229268	5.5822
Cpro.40363	hypothetical protein	Chro.40398	hypothetical protein	0.962	0.0777	0.0169	0.217503	5.1376
Cpro.40364	hypothetical protein	Chro.40399	hypothetical protein	0.975	0.0912	0.0101	0.110746	6.061
Cpro.40365	hypothetical protein	Chro.40400	hypothetical protein	0.906	0.0275	0.046	1.67273	15.2221
Cpro.40366	hypothetical protein	Chro.40401	hypothetical protein	0.981	0.0787	0.0096	0.121982	4.6
Cpro.40367	hypothetical protein	Chro.40402	hypothetical protein	0.896	0.114	0.0317	0.27807	13.2341
Cpro.40368	hypothetical protein	Chro.40403	hypothetical protein	0.962	0.0979	0.0173	0.176711	7.6183
Cpro.40369	hypothetical protein	Chro.40404	hypothetical protein	0.971	0.0537	0.0125	0.232775	3.9633
Cpro.40370	agrin	Chro.40405	T13C2.5	0.88	0.1122	0.0286	0.254902	4.6678
Cpro.40372	Protein cigB gi|1513302|gb|AAB06791.1| CigB	Chro.40407	hypothetical protein	0.959	0.0573	0.0165	0.287958	8.1474
Cpro.40373	hypothetical protein	Chro.40408	hypothetical protein	0.967	0.102	0.0132	0.129412	4.0699
Cpro.40374	hypothetical protein	Chro.40409	hypothetical protein	0.973	0.0841	0.0106	0.12604	9.0333
Cpro.40375	hypothetical protein	Chro.40410	hypothetical protein	0.959	0.0774	0.0186	0.24031	3.9416
Cpro.40376	hypothetical protein	Chro.40411	hypothetical protein	0.982	0.0344	0.0083	0.241279	4.6
Cpro.40377	hypothetical protein	Chro.40412	hypothetical protein	0.96	0.0568	0.0185	0.325704	38.4994
Cpro.40379	immunodominant antigen Cp23	Chro.40414	immunodominant antigen Cp23	0.973	0.0389	0.0133	0.341902	2.5107
Cpro.40380	hypothetical protein	Chro.40415	hypothetical protein	0.688	0.1877	0.104	0.554076	6.9007
Cpro.40381	hypothetical protein	Chro.40416	hypothetical protein	0.87	0.201	0.054	0.268657	6.9588
Cpro.40382	hypothetical protein	Chro.40417	hypothetical protein	0.83	0.0684	0.0928	1.35673	13.7117
Cpro.40383	hypothetical protein	Chro.40418	hypothetical protein	0.829	0.0452	0.0745	1.64823	6.6345
Cpro.40384	hypothetical protein	Chro.40419	hypothetical protein	0.677	0.4134	0.2206	0.533624	5.7964
Cpro.40385	hypothetical protein	Chro.40420	hypothetical protein	0.874	0.1135	0.0589	0.518943	4.3295
Cpro.40386	hypothetical protein	Chro.40421	hypothetical protein	0.719	0.1464	0.0635	0.433743	5.0462
Cpro.40387	hypothetical protein	Chro.40422	hypothetical protein	0.937	0.0387	0.0254	0.656331	8.2128
Cpro.40388	Serine/threonine protein kinase mph1 gi|11359342|pir||T43539 spindle checkpoint protein kinase Mps1 homolog	Chro.40423	serine/threonine protein kinase mph1	0.989	0.0671	0.0043	0.0640835	4.3888
Cpro.40389	ankyrin-related protein	Chro.40424	hypothetical protein	0.991	0.0902	0.0035	0.0388027	2.8112
Cpro.40390	hypothetical protein	Chro.40426	hypothetical protein	1	0	0	None	4.6
Cpro.40391	hypothetical protein	Chro.40427	hypothetical protein	0.993	0.0311	0.0032	0.102894	4.6
Cpro.40392	unknown protein	Chro.40428	hypothetical protein	0.976	0.0752	0.0104	0.138298	7.5901
Cpro.40393	hypothetical protein	Chro.40429	hypothetical protein	0.936	0.0335	0.0292	0.871642	43.781
Cpro.40394	eukaryotic translation initiation factor 3 subunit 8	Chro.40430	eukaryotic translation initiation factor 3 subunit 8	0.987	0.0768	0.0051	0.0664062	8.8482
Cpro.40395	hypothetical protein	Chro.40431	hypothetical protein	0.975	0.0374	0.0107	0.286096	4.6
Cpro.40396	hypothetical protein	Chro.40432	hypothetical protein	0.991	0.0135	0.0039	0.288889	4.6
Cpro.40397	expressed protein	Chro.40433	hypothetical protein	0.949	0.0437	0.0223	0.510297	32.0096
Cpro.40398	transcription initiation factor iie, alpha subunit, putative	Chro.40434	transcription initiation factor iie, alpha subunit	0.974	0.0659	0.0103	0.156297	5.728
Cpro.40399	hypothetical protein	Chro.40435	hypothetical protein	0.959	0.0846	0.0152	0.179669	3.4789
Cpro.40400	COG0666: FOG: Ankyrin repeat	Chro.40436	hypothetical protein	0.983	0.0637	0.0076	0.119309	10.7273
Cpro.40401	CNPV310 ankyrin repeat protein	Chro.40437	hypothetical protein	0.961	0.0148	0.0196	1.32432	0.8376
Cpro.40402	CCT chaperonin gamma subunit	Chro.40439	CCT chaperonin gamma subunit	0.998	0.0471	0.0008	0.0169851	25.9447
Cpro.40403	T-complex protein 1	Chro.40440	T-complex protein 1	0.998	0.0582	0.0008	0.0137457	6.9651
Cpro.40404	hypothetical protein	Chro.40442	hypothetical protein	0.988	0.0803	0.0037	0.0460772	3.8361
Cpro.40405	similar to tyrosyl-tRNA synthetase	Chro.40444	similar to tyrosyl-tRNA synthetase	0.978	0.052	0.0059	0.113462	8.7118
Cpro.40406	hypothetical protein	Chro.40445	hypothetical protein	0.979	0.0745	0.0066	0.0885906	4.4797
Cpro.40407	hypothetical protein	Chro.40446	hypothetical protein	0.988	0.0549	0.0047	0.0856102	2.3394
Cpro.40408	hypothetical protein	Chro.40447	hypothetical protein	0.929	0.1853	0.0299	0.16136	2.2675
Cpro.40409	hypothetical protein	Chro.40448	hypothetical protein	0.961	0.1026	0.0151	0.147173	20.4885
Cpro.40411	Hypothetical protein CBG01825	Chro.40450	exosome complex exonuclease RRP41	0.993	0.3561	0.0026	0.00730132	4.6
Cpro.40412	hypothetical protein	Chro.40451	hypothetical protein	0.922	0.1135	0.0167	0.147137	4.565
Cpro.40413	PSMD1 protein	Chro.40452	PSMD1 protein	0.98	0.0519	0.0086	0.165703	30.2806
Cpro.40414	hypothetical protein	Chro.40453	hypothetical protein	0.987	0.0356	0.0057	0.160112	4.4851
Cpro.40415	hypothetical protein	Chro.40454	hypothetical protein	0.85	0.2075	0.0529	0.25494	4.6712
Cpro.40416	ORF MSV156 hypothetical protein	Chro.40455	hypothetical protein	0.977	0.0318	0.0076	0.238994	7.754
Cpro.40419	Vacuolar protein sorting 11	Chro.40458	vacuolar protein sorting 11	0.986	0.0414	0.0053	0.128019	3.0933
Cpro.40421	ribosomal protein S5	Chro.40460	ribosomal protein S5	1	0.0445	0	0	4.6
Cpro.40422	p47 protein isoform a	Chro.40461	hypothetical protein	0.99	0.0575	0.0039	0.0678261	4.6
Cpro.40423	putative GTPase	Chro.40462	GTPase	0.983	0.0747	0.0077	0.103079	16.6821
Cpro.40424	RIKEN cDNA 1200003O06	Chro.40463	RIKEN cDNA 1200003O06	0.997	0.0521	0.0013	0.024952	21.8941
Cpro.40425	Krueppel-like protein	Chro.40464	hypothetical protein	0.98	0.0614	0.0083	0.135179	10.4669
Cpro.40426	rabGDI protein	Chro.40465	hypothetical protein	1	0.1043	0	0	4.6
Cpro.40429	hypothetical protein, conserved	Chro.40468	hypothetical protein	0.997	0.0898	0.0013	0.0144766	4.6
Cpro.40430	hypothetical protein	Chro.40469	hypothetical protein	0.994	0.1071	0.0029	0.0270775	33.7554
Cpro.40431	hypothetical protein, conserved	Chro.40470	hypothetical protein	0.885	0.0551	0.0131	0.23775	1.9069
Cpro.40432	hypothetical protein	Chro.40471	hypothetical protein	0.964	0.0465	0.0139	0.298925	10.2648
Cpro.40436	hypothetical protein	Chro.40476	hypothetical protein	0.958	0.0524	0.0083	0.158397	4.6
Cpro.40436	hypothetical protein	Chro.40477	hypothetical protein, conserved	0.958	0.0524	0.0083	0.158397	4.6
Cpro.40439	hypothetical protein	Chro.40479	hypothetical protein	0.953	0.0508	0.0124	0.244094	6.8232
Cpro.40440	hypothetical protein	Chro.40480	hypothetical protein	0.969	0.0717	0.0128	0.178522	8.9691
Cpro.40441	hypothetical protein	Chro.40481	hypothetical protein	0.968	0.0294	0.0152	0.517007	5.7646
Cpro.40442	Putative ATP-dependent RNA helicase cdc28	Chro.40482	HelD protein-related	0.954	0.0804	0.0154	0.191542	13.116
Cpro.40443	hypothetical protein	Chro.40483	hypothetical protein	0.937	0.072	0.0258	0.358333	5.7071
Cpro.40444	hypothetical protein	Chro.40484	hypothetical protein	0.989	0.0544	0.0048	0.0882353	4.6
Cpro.40445	hypothetical protein	Chro.40485	hypothetical protein	0.971	0.0404	0.0116	0.287129	0.6988
Cpro.40446	hypothetical protein	Chro.40486	hypothetical protein	0.89	0.1001	0.0454	0.453546	1.8088
Cpro.40447	hypothetical protein	Chro.40487	hypothetical protein	0.971	0.0662	0.0125	0.188822	6.0302
Cpro.40448	hypothetical protein	Chro.40488	hypothetical protein	0.972	0.0569	0.0135	0.237258	10.0135
Cpro.40449	Hypothetical protein CBG09822	Chro.40489	adapter-related protein complex 1 beta 1 subunit (Beta-adaptin 1) (Adaptor protein complex AP-1 beta-1 subunit) (Golgi adaptor HA1/AP1 adaptin beta subunit) (Clathrin assembly protein complex 1 beta large chain)	0.99	0.0827	0.0041	0.0495768	8.3482
Cpro.40450	asparagine-rich protein	Chro.40490	asparagine-rich protein	0.965	0.1006	0.0117	0.116302	3.6517
Cpro.40451	origin recognition complex 1 protein	Chro.40491	origin recognition complex subunit 1	0.977	0.0793	0.0094	0.118537	8.3019
Cpro.40452	hypothetical protein	Chro.40492	hypothetical protein	0.983	0.0426	0.007	0.164319	37.9068
Cpro.40453	hypothetical protein	Chro.40493	hypothetical protein	1	0.057	0	0	7.2169
Cpro.40454	hypothetical protein	Chro.40494	hypothetical protein	0.986	0.0612	0.0048	0.0784314	2.5175
Cpro.40455	hypothetical protein	Chro.40495	hypothetical protein	0.945	0.0747	0.0254	0.340027	7.6125
Cpro.40456	hypothetical protein	Chro.40496	hypothetical protein	0.975	0.0678	0.0151	0.222714	7.0514
Cpro.40457	hypothetical protein	Chro.40497	hypothetical protein	0.987	0.068	0.0057	0.0838235	7.8131
Cpro.40458	hypothetical protein	Chro.40498	hypothetical protein	0.99	0.0763	0.0043	0.0563565	4.6
Cpro.40459	hypothetical protein	Chro.40499	hypothetical protein	1	0.074	0	0	4.6
Cpro.40460	similar to KIAA1542 protein	Chro.40500	KIAA1453 protein	0.964	0.0561	0.0161	0.286988	7.307
Cpro.40461	hypothetical protein	Chro.40501	hypothetical protein	0.968	0.0612	0.0156	0.254902	6.8567
Cpro.40462	SD17927p	Chro.40502	hypothetical protein	1	0.1401	0	0	4.6
Cpro.40463	ATP-binding cassette protein 2	Chro.40503	hypothetical protein	0.949	0.0503	0.0235	0.467197	8.1444
Cpro.40464	hypothetical protein AN4477.2	Chro.40505	hypothetical protein	0.979	0.0845	0.0091	0.107692	3.9543
Cpro.40465	Chain A, Crystal Structure Of Dhfr-Ts From Cryptosporidium Hominis gi|39654757|pdb|1QZF|B Chain B, Crystal Structure Of Dhfr-Ts From Cryptosporidium Hominis gi|39654758|pdb|1QZF|C Chain C, Crystal Structure Of Dhfr-Ts From Cryptosporidium Hominis gi|39654759|pdb|1QZF|D Chain D, Crystal Structure Of Dhfr-Ts From Cryptosporidium Hominis gi|39654760|pdb|1QZF|E Chain E, Crystal Structure Of Dhfr-Ts F…	Chro.40506	Chain A, crystal structure of Dhfr	0.979	0.0809	0.0092	0.113721	6.8633
Cpro.40466	hypothetical protein	Chro.40507	hypothetical protein	0.944	0.1015	0.0238	0.234483	6.3236
Cpro.40467	hypothetical protein	Chro.40508	hypothetical protein	0.892	0.1166	0.0519	0.445111	4.6458
Cpro.40469	hypothetical protein	Chro.40510	hypothetical protein	0.869	0.07	0.0377	0.538571	2.3139
Cpro.40470	hypothetical protein	Chro.40511	hypothetical protein	0.82	0.1541	0.0904	0.586632	5.3545
Cpro.50001	finger protein (clone XlcOF7.1) - African clawed frog (fragment)	Chro.50010	hypothetical protein	0.637	0.4493	0.1883	0.419096	1.8903
Cpro.50002	hypothetical protein	Chro.50012	hypothetical protein	0.938	0.0818	0.0289	0.353301	3.4255
Cpro.50003	sbmA	Chro.50013	sbmA	0.971	0.0793	0.0133	0.167718	9.2991
Cpro.50004	hypothetical protein	Chro.50014	sensitivity to microcin B17, possibly envelop protein	0.988	0.1139	0.0051	0.0447761	5.2133
Cpro.50005	hypothetical protein	Chro.50015	hypothetical protein	0.983	0.0889	0.0079	0.0888639	4.161
Cpro.50006	FLJ20303 protein	Chro.50016	FLJ20303 protein	0.987	0.0792	0.0066	0.0833333	8.5312
Cpro.50007	glycolipid transfer protein, putative	Chro.50017	glycolipid transfer protein	0.939	0.0954	0.0278	0.291405	7.8229
Cpro.50008	transcription factor IIIb subunit, putative	Chro.50018	transcription factor IIIb subunit	0.986	0.0445	0.0068	0.152809	16.6583
Cpro.50009	protein with DNAJ domain, dnj1/sis1 family	Chro.50019	protein with DNAJ domain, dnj1/sis1 family	0.994	0.0628	0.0024	0.0382166	4.6
Cpro.50010	chaperone, putative	Chro.50020	chaperone	0.991	0.0507	0.0039	0.0769231	4.6
Cpro.50011	co-chaperone GrpE, putative	Chro.50021	co-chaperone GrpE	0.996	0.0752	0.0019	0.025266	5.8569
Cpro.50012	hypothetical protein MG01634.4	Chro.50022	hypothetical protein	0.983	0.0801	0.0065	0.0811486	11.3178
Cpro.50013	hypothetical protein	Chro.50023	hypothetical protein	0.896	0.1079	0.0501	0.464319	8.0498
Cpro.50014	hypothetical protein	Chro.50024	hypothetical protein	0.986	0.0948	0.0062	0.0654008	5.2139
Cpro.50015	blr4459	Chro.50025	blr4459	0.975	0.0396	0.011	0.277778	4.892
Cpro.50016	RIKEN cDNA 4933425L06	Chro.50026	RIKEN cDNA 4933425L06	0.993	0.0768	0.0035	0.0455729	9.4685
Cpro.50017	hypothetical protein MG02660.4	Chro.50027	hypothetical protein	0.99	0.0541	0.0046	0.0850277	11.1568
Cpro.50018	CG3061-PA	Chro.50028	CG3061-PA	0.993	0.0835	0.0029	0.0347305	2.9516
Cpro.50019	TSP1 domain-containing protein TSP2 precursor	Chro.50029	TSP1 domain-containing protein TSP2 precursor	0.992	0.0942	0.0034	0.0360934	4.6
Cpro.50020	hypothetical protein	Chro.50030	hypothetical protein	0.974	0.076	0.0123	0.161842	6.829
Cpro.50021	mitochondrial processing peptidase beta subunit	Chro.50031	mitochondrial processing peptidase beta subunit	0.984	0.0217	0.0068	0.313364	9.6559
Cpro.50022	hypothetical protein	Chro.50032	hypothetical protein	0.989	0.0424	0.0045	0.106132	4.6
Cpro.50023	hypothetical protein	Chro.50033	hypothetical protein	0.939	0.0404	0.025	0.618812	1.5458
Cpro.50024	hypothetical protein	Chro.50034	hypothetical protein	0.909	0.0748	0.0355	0.474599	6.1991
Cpro.50025	hypothetical protein	Chro.50036	hypothetical protein	0.973	0.0734	0.0119	0.162125	9.6346
Cpro.50026	type 2 adenylate kinase	Chro.50037	type 2 adenylate kinase	0.995	0.123	0.0018	0.0146341	1.1381
Cpro.50027	20k cyclophilin - Toxoplasma gondii (fragment) gi|436959|gb|AAA17998.1| 20 kDa cyclophilin precursor	Chro.50038	hypothetical protein	0.982	0.0606	0.0073	0.120462	0.9715
Cpro.50028	ATP synthase (C/AC39) subunit, putative	Chro.50039	ATP synthase (C/AC39) subunit	0.997	0.0346	0.0011	0.0317919	4.6
Cpro.50029	similar to XM_028438 CGI-101 protein in Homo sapiens	Chro.50040	similar to XM_028438 CGI-101	1	0.0423	0	0	4.6
Cpro.50030	hypothetical protein	Chro.50041	hypothetical protein	0.991	0.0423	0.004	0.0945626	4.6
Cpro.50031	similar to Homo sapiens (Human). Hypothetical protein FLJ20624	Chro.50042	hypothetical protein	0.947	0.1182	0.0226	0.191201	7.4617
Cpro.50032	hypothetical protein	Chro.50043	hypothetical protein	0.964	0.0705	0.013	0.184397	5.1937
Cpro.50034	hypothetical protein	Chro.50045	hypothetical protein	0.963	0.0484	0.0157	0.32438	0.7393
Cpro.50035	RNA recognition motif (RRM)-containing protein	Chro.50046	RNA recognition motif (RRM)-containing protein	0.985	0.1165	0.0062	0.0532189	3.7287
Cpro.50036	hypothetical protein	Chro.50047	hypothetical protein	0.988	0.1441	0.0054	0.037474	4.6
Cpro.50037	hypothetical protein	Chro.50048	hypothetical protein	0.957	0.1401	0.0157	0.112063	2.5738
Cpro.50038	superoxide dismutase	Chro.50049	superoxide dismutase	0.991	0.0975	0.0058	0.0594872	2.0393
Cpro.50039	beta 7 subunit of 20S proteasome	Chro.50050	beta tubulin	1	0.0559	0	0	9.0078
Cpro.50040	rhoptry protein	Chro.50051	hypothetical protein	0.953	0.0644	0.0255	0.395963	8.9571
Cpro.50041	long-chain fatty acid CoA ligase, putative	Chro.50052	long-chain fatty acid CoA ligase	0.972	0.0606	0.0121	0.19967	8.1023
Cpro.50042	hypothetical protein	Chro.50053	hypothetical protein	0.983	0.0464	0.0074	0.159483	6.704
Cpro.50043	hypothetical protein	Chro.50054	hypothetical protein	0.979	0.0607	0.0012	0.0197694	4.6
Cpro.50044	histone H2B	Chro.50055	histone H2B	1	0.0194	0	0	4.6
Cpro.50045	ACTIN gi|323089|pir||A45634 actin - Cryptosporidium parvum gi|156695|gb|AAA28295.1| actin	Chro.50056	actin	0.995	0.0509	0.0023	0.0451866	9.2279
Cpro.50046	putative glycan synthetase	Chro.50057	glycan synthetase	0.982	0.0416	0.0085	0.204327	9.5844
Cpro.50047	hypothetical protein	Chro.50058	hypothetical protein	0.983	0.0629	0.0067	0.106518	13.6333
Cpro.50048	hypothetical protein	Chro.50061	hypothetical protein	0.975	0.0859	0.0086	0.100116	14.0015
Cpro.50049	a large protein with a conserved N-terminal domain, a central AAA ATPase domain (with similarity to dynein) composed of 6 tandem AAA protomers, and a C-terminal M-domain containing MIDAS (Metal Ion Dependent Adhesion Site) sequence motifs.; Mdn1p	Chro.50062	hypothetical protein	0.97	0.0739	0.0106	0.143437	4.6675
Cpro.50050	hypothetical protein	Chro.50063	hypothetical protein	0.981	0.0446	0.0081	0.181614	8.2043
Cpro.50051	N-acetyltransferase, putative	Chro.50064	N-acetyltransferase	0.981	0.0781	0.0081	0.103713	4.8071
Cpro.50052	hypothetical protein	Chro.50065	hypothetical protein	0.988	0.0366	0	0	4.6
Cpro.50053	hypothetical protein	Chro.50066	hypothetical protein	0.959	0.0725	0.0132	0.182069	8.7875
Cpro.50054	similar to Dictyostelium discoideum (Slime mold). cAMP-regulated D2 protein precursor	Chro.50067	slr8023	0.991	0.0658	0.0035	0.0531915	19.0178
Cpro.50055	hypothetical protein	Chro.50068	hypothetical protein	0.965	0.1201	0.0128	0.106578	1.6115
Cpro.50056	hypothetical protein	Chro.50069	hypothetical protein	0.966	0.1262	0.014	0.110935	4.6
Cpro.50057	40S ribosomal protein S7 homologue, putative	Chro.50070	40S ribosomal protein S7	1	0.0347	0	0	4.6
Cpro.50058	hypothetical protein	Chro.50071	hypothetical protein	0.938	0.0718	0.0209	0.291086	2.9664
Cpro.50059	hypothetical protein	Chro.50072	hypothetical protein	0.962	0.0702	0.0174	0.247863	11.9853
Cpro.50060	hypothetical protein	Chro.50073	hypothetical protein	0.975	0.0863	0.0093	0.107764	7.688
Cpro.50061	similar to Protein required for cell viability; Yjl010cp	Chro.50074	similar to protein required for cell viability\; Yjl010cp	0.983	0.0499	0.0071	0.142285	7.6844
Cpro.50062	u5 small nuclear ribonucleoprotein helicase (2N18)	Chro.50075	hypothetical protein	0.957	0.0457	0.0187	0.40919	7.3576
Cpro.50064	U5 small nuclear ribonucleoprotein helicase, putative	Chro.50077	hypothetical protein	0.976	0.0983	0.0104	0.105799	8.3404
Cpro.50065	Unknown (protein for MGC:63563)	Chro.50078	hypothetical protein	0.935	0.0384	0.0294	0.765625	6.8053
Cpro.50066	hypothetical protein	Chro.50079	hypothetical protein	0.97	0.0342	0.0111	0.324561	8.5512
Cpro.50067	hypothetical protein	Chro.50080	hypothetical protein	0.981	0.059	0.0083	0.140678	10.5515
Cpro.50068	SNF2domain/helicase domain-containing protein	Chro.50081	hypothetical protein	0.881	0.1398	0.0688	0.492132	3.8307
Cpro.50069	Possible maltodextrin glucosidase	Chro.50900	alpha amylase	0.988	0.1206	0.0048	0.039801	1.9947
Cpro.50070	hypothetical protein	Chro.50083	hypothetical protein	0.993	0.0558	0.0028	0.0501792	22.6274
Cpro.50071	hypothetical protein	Chro.50084	hypothetical protein	0.942	0.0625	0.0266	0.4256	26.0841
Cpro.50072	pre-mRNA cleavage complex ii protein clp1-related	Chro.50085	pre-mRNA cleavage complex ii protein clp1-related	0.967	0.0814	0.0098	0.120393	7.3618
Cpro.50073	hypothetical protein	Chro.50086	D13	0.972	0.0815	0.0114	0.139877	6.0772
Cpro.50074	hypothetical protein	Chro.50088	hypothetical protein	0.966	0.0464	0.0118	0.25431	2.6339
Cpro.50075	hypothetical protein	Chro.50089	hypothetical protein	0.878	0.1032	0.0243	0.235465	6.5963
Cpro.50076	hypothetical protein	Chro.50090	hypothetical protein	0.928	0.0339	0.0284	0.837758	2.5709
Cpro.50077	hypothetical protein	Chro.50091	hypothetical protein	0.988	0.0614	0.005	0.0814332	4.6
Cpro.50078	hypothetical protein	Chro.50092	hypothetical protein	0.966	0.037	0.0138	0.372973	5.7127
Cpro.50079	hypothetical protein	Chro.50093	hypothetical protein	0.952	0.039	0.0205	0.525641	2.7758
Cpro.50080	hypothetical protein	Chro.50094	hypothetical protein	0.984	0.0546	0.0065	0.119048	4.0403
Cpro.50081	actin depolymerizing factor -related	Chro.50095	actin depolymerizing factor -related	0.993	0.0454	0.0035	0.0770925	4.6
Cpro.50082	AAA family ATPase, putative	Chro.50096	AAA family ATPase	0.989	0.0515	0.0047	0.0912621	5.2264
Cpro.50083	ribosomal protein S10	Chro.50097	ribosomal protein S10	1	0.0232	0	0	4.6
Cpro.50084	ADP-ribosylation factor, putative	Chro.50098	ADP-ribosylation factor	0.989	0.0492	0.0049	0.0995935	2.7983
Cpro.50086	similar to Oryza sativa (japonica cultivar-group). Putative histone acetyltransferase	Chro.50100	hypothetical protein	0.97	0.0434	0.0145	0.334101	6.3407
Cpro.50087	hypothetical protein	Chro.50101	hypothetical protein	0.979	0.0614	0.0093	0.151466	6.6143
Cpro.50088	hypothetical protein	Chro.50102	hypothetical protein	0.976	0.0436	0.0098	0.224771	4.6
Cpro.50089	hypothetical protein	Chro.50103	hypothetical protein	0.949	0.0461	0.023	0.498915	6.403
Cpro.50090	hypothetical protein	Chro.50105	hypothetical protein	0.962	0.0666	0.0156	0.234234	5.9559
Cpro.50091	hypothetical protein	Chro.50106	hypothetical protein	0.983	0.0463	0.0089	0.192225	4.6
Cpro.50092	hypothetical protein	Chro.50107	hypothetical protein	0.943	0.0568	0.0299	0.526408	9.3347
Cpro.50093	hypothetical protein	Chro.50108	hypothetical protein	0.977	0.0664	0.0097	0.146084	14.8386
Cpro.50094	hypothetical protein	Chro.50109	hypothetical protein	0.975	0.0687	0.0101	0.147016	13.7191
Cpro.50095	ENSANGP00000000281	Chro.50110	ENSANGP00000000281	0.992	0.0484	0.0036	0.0743802	3.337
Cpro.50096	hypothetical protein	Chro.50111	hypothetical protein	0.981	0.0422	0.0081	0.191943	8.7437
Cpro.50097	hypothetical protein	Chro.50112	hypothetical protein	0.956	0.0512	0.0159	0.310547	8.9115
Cpro.50098	similar to RIKEN cDNA 1500016H10	Chro.50113	similar to RIKEN cDNA 1500016H10	0.981	0.0873	0.007	0.0801833	4.4657
Cpro.50099	hypothetical protein	Chro.50114	hypothetical protein	0.985	0.0431	0.0076	0.176334	8.6336
Cpro.50100	similar to Bifidobacterium longum NCC2705. Hypothetical protein possibly in the phosphoglycerate mutase family	Chro.50115	NCC2705	0.992	0.0373	0.0022	0.0589812	4.6
Cpro.50101	leucine aminopeptidase, putative	Chro.50116	leucine aminopeptidase	0.987	0.0791	0.0058	0.0733249	10.0163
Cpro.50103	dolichyl phosphate glucosyltransferase	Chro.50118	dolichyl phosphate glucosyltransferase	0.975	0.0592	0.0111	0.1875	6.862
Cpro.50104	hypothetical protein	Chro.50120	hypothetical protein	0.955	0.0696	0.0219	0.314655	10.2804
Cpro.50105	hypothetical protein	Chro.50121	hypothetical protein	0.981	0.0528	0.0085	0.160985	4.6
Cpro.50106	Unknown (protein for MGC:66301)	Chro.50122	hypothetical protein	0.989	0.0667	0.0048	0.071964	9.8541
Cpro.50107	ubiquitin B	Chro.50123	ubiquitin B	1	0.0559	0	0	4.6
Cpro.50108	hypothetical protein	Chro.50124	hypothetical protein	0.962	0.0785	0.0164	0.208917	5.1963
Cpro.50109	hypothetical protein	Chro.50125	hypothetical protein	0.99	0.0496	0.0047	0.0947581	17.2243
Cpro.50110	hypothetical protein	Chro.50126	hypothetical protein	0.986	0.1494	0.0057	0.0381526	1.2382
Cpro.50111	cdc2-like protein kinase	Chro.50127	cdc2-like protein kinase	1	0.0198	0	0	4.6
Cpro.50112	ubiquitin specific protease 9, X chromosome; fats facets protein related, X; EST AA407302	Chro.50128	USP31 protein	0.97	0.051	0.0145	0.284314	6.9345
Cpro.50113	expressed protein	Chro.50129	hypothetical protein	0.981	0.0755	0.0076	0.100662	0.7723
Cpro.50114	hypothetical protein	Chro.50130	hypothetical protein	0.98	0.0504	0.007	0.138889	20.892
Cpro.50115	similar to CG14544 gene product, putative	Chro.50131	similar to CG14544 gene product	0.99	0.0615	0.0028	0.0455285	4.6
Cpro.50116	hypothetical protein	Chro.50132	hypothetical protein	0.962	0.0995	0.0097	0.0974874	2.4349
Cpro.50117	hypothetical protein	Chro.50133	hypothetical protein	0.966	0.0456	0.0157	0.344298	6.0164
Cpro.50118	Unknown (protein for MGC:76275)	Chro.50134	hypothetical protein	0.968	0.0589	0.0138	0.234295	6.1337
Cpro.50120	hypothetical protein	Chro.50136	hypothetical protein	0.941	0.0915	0.0164	0.179235	6.7811
Cpro.50121	hypothetical protein	Chro.50137	hypothetical protein	0.946	0.0847	0.0219	0.25856	5.3881
Cpro.50122	hypothetical protein	Chro.50138	hypothetical protein	0.96	0.0536	0.0171	0.31903	6.1156
Cpro.50123	hypothetical protein	Chro.50139	hypothetical protein	0.97	0.0762	0.0129	0.169291	5.653
Cpro.50124	hypothetical protein	Chro.50140	hypothetical protein	0.981	0.0581	0.0081	0.139415	6.2413
Cpro.50125	acidic ribosomal protein P1 - hydromedusa (Polyorchis penicillatus) gi|227678|prf||1709160A acidic ribosomal protein A1	Chro.50141	acidic ribosomal protein P1	0.984	0.036	0	0	6.3671
Cpro.50126	Homo sapiens proteasome (prosome, macropain) 26S subunit, non-ATPase, 9	Chro.50142	proteasome (prosome, macropain) 26S subunit, non-ATPase, 9	0.966	0.0651	0.0148	0.227343	8.614
Cpro.50127	Ubiquitin Carboxyl-terminal Hydrolase-like zinc finger protein	Chro.50143	hypothetical protein	0.984	0.0554	0.0053	0.0956679	5.3688
Cpro.50128	hypothetical protein	Chro.50144	hypothetical protein	0.955	0.0962	0.0207	0.215177	4.9752
Cpro.50129	hypothetical protein	Chro.50145	hypothetical protein	0.971	0.0556	0.0129	0.232014	23.135
Cpro.50130	ARP1 actin-related protein 1 homolog A, centractin alpha; ARP1 (actin-related protein 1, yeast) homolog A (centractin alpha); centractin alpha; actin-RPV; centrosome-associated actin homolog; ARP1, yeast homolog A	Chro.50146	ARP1 actin-related protein 1 A, centractin alpha	0.997	0.0677	0.0011	0.0162482	33.7073
Cpro.50131	SPFH domain / Band 7 family, putative	Chro.50147	SPFH domain / Band 7 family	0.989	0.0807	0.0047	0.0582404	4.6
Cpro.50132	similar to KIAA0700 protein	Chro.50148	transcriptional regulatory - like protein	0.982	0.061	0.0083	0.136066	7.916
Cpro.50133	defender against cell death protein -related	Chro.50149	defender against cell death protein	0.985	0.0575	0.0066	0.114783	4.6
Cpro.50134	hypothetical protein	Chro.50150	hypothetical protein	0.978	0.0682	0.0098	0.143695	8.5495
Cpro.50136	unnamed protein product	Chro.50152	maternal embryonic leucine zipper kinase	0.982	0.0594	0.0079	0.132997	5.789
Cpro.50138	hypothetical protein	Chro.50155	hypothetical protein	0.944	0.0684	0.0221	0.323099	3.8584
Cpro.50139	putative UDP-GlcNAc:dolichol phosphate N-acetylglucosamine-1-phosphate transferase	Chro.50156	N-acetylglucosamine-1-phosphate transferase	0.991	0.0407	0.0041	0.100737	4.6
Cpro.50140	transmembrane protein 17	Chro.50157	transmembrane protein 17	0.981	0.1227	0.0048	0.0391198	4.8331
Cpro.50141	small nuclear ribonucleoprotein smd1	Chro.50158	small nuclear ribonucleoprotein smd1	0.968	0.1102	0.0123	0.111615	0.6587
Cpro.50142	40S RIBOSOMAL PROTEIN S13 gi|419802|pir||S30146 ribosomal protein S13, cytosolic - maize gi|288059|emb|CAA44311.1| cytoplasmatic ribosomal protein S13	Chro.50159	40S ribosomal protein S13	1	0.0092	0	0	4.6
Cpro.50143	hypothetical protein	Chro.50160	RNA-binding protein	0.975	0.0695	0.0111	0.159712	13.6287
Cpro.50144	endonuclease G-like 1	Chro.50161	endonuclease G-like 1	0.992	0.0556	0.0036	0.0647482	4.6
Cpro.50145	hypothetical protein	Chro.50162	hypothetical protein	0.839	0.3176	0.0584	0.183879	11.5588
Cpro.50146	hypothetical protein	Chro.50163	hypothetical protein	0.976	0.0586	0.0101	0.172355	4.6
Cpro.50147	hypothetical protein	Chro.50164	hypothetical protein	0.975	0.0757	0.0109	0.143989	13.7573
Cpro.50148	hypothetical protein	Chro.50165	hypothetical protein	0.971	0.0439	0.0153	0.348519	4.5487
Cpro.50149	Pdd1p	Chro.50166	Pdd1p	0.965	0.0708	0.0166	0.234463	7.0096
Cpro.50150	hypothetical protein	Chro.50167	hypothetical protein	0.966	0.0611	0.0064	0.104746	4.6
Cpro.50151	hypothetical protein, conserved	Chro.50168	hypothetical protein	0.992	0.0564	0.0033	0.0585106	1.5939
Cpro.50152	DNA methyltransferase PMT1 - like protein	Chro.50169	DNA methyltransferase PMT1 - like protein	0.975	0.0538	0.0115	0.213755	6.3687
Cpro.50153	Arabidopsis thaliana BRAHMA ortholog	Chro.50170	hypothetical protein	0.978	0.0547	0.0104	0.190128	9.8719
Cpro.50154	hypothetical protein	Chro.50171	hypothetical protein	0.972	0.0538	0.0121	0.224907	4.5644
Cpro.50155	DEAD/DEAH box helicase, putative	Chro.50172	DEAD/DEAH box helicase	0.987	0.0621	0.0059	0.0950081	4.9442
Cpro.50156	hypothetical protein	Chro.50173	hypothetical protein	0.968	0.0733	0.0144	0.196453	12.338
Cpro.50157	expressed protein	Chro.50174	similar to RIKEN cDNA 5730484M20	0.968	0.0515	0.0151	0.293204	16.9027
Cpro.50158	dolichyl-phosphate b-D-mannosyltransferase, putative	Chro.50175	dolichyl-phosphate b-D-mannosyltransferase	0.986	0.1217	0.006	0.0493016	5.7307
Cpro.50159	unknown protein	Chro.50176	hypothetical protein	0.975	0.0469	0.0112	0.238806	4.6
Cpro.50160	Cysteine-rich secretory protein-3 precursor (CRISP-3) gi|2388785|emb|CAA04729.1| cysteine-rich secretory protein-3	Chro.50177	cysteine-rich secretory protein-3 precursor (CRISP-3)	0.988	0.0707	0.0052	0.0735502	7.7906
Cpro.50161	AAA ATPase	Chro.50178	AAA ATPase	0.987	0.0881	0.0055	0.0624291	9.4517
Cpro.50162	extragenic suppressor of the bimD6 mutation-related	Chro.50179	extragenic suppressor of the bimD6 mutation-related	0.972	0.0707	0.0126	0.178218	9.8418
Cpro.50163	hypothetical protein	Chro.50180	hypothetical protein	0.946	0.0485	0.025	0.515464	8.4274
Cpro.50164	hypothetical protein	Chro.50181	hypothetical protein	0.969	0.0639	0.0134	0.209703	3.231
Cpro.50165	hypothetical protein	Chro.50182	hypothetical protein	0.965	0.0581	0.0161	0.277108	10.7063
Cpro.50166	expressed protein	Chro.50183	hypothetical protein	1	0.0828	0	0	4.6
Cpro.50167	enolase	Chro.50184	enolase	0.984	0.0938	0.0048	0.0511727	30.5378
Cpro.50168	hypothetical protein	Chro.50185	hypothetical protein	0.979	0.0727	0.009	0.123796	3.5332
Cpro.50169	erythrocyte membrane-associated giant protein antigen 332	Chro.50186	hypothetical protein	0.862	0.1569	0.0585	0.372849	2.8069
Cpro.50170	hypothetical protein	Chro.50187	hypothetical protein	0.981	0.032	0.0095	0.296875	2.5802
Cpro.50171	hypothetical protein	Chro.50188	hypothetical protein	1	0.0667	0	0	1.9551
Cpro.50172	hypothetical protein	Chro.50189	hypothetical protein	1	0.0856	0	0	2.8736
Cpro.50173	Arabidopsis thaliana At4g21800/F17L22_260	Chro.50190	XPA binding protein 1	0.986	0.0476	0.006	0.12605	4.6
Cpro.50174	hypothetical protein	Chro.50191	hypothetical protein	0.967	0.1017	0.0148	0.145526	5.073
Cpro.50175	hypothetical protein	Chro.50192	hypothetical protein	0.981	0.0824	0.0083	0.100728	6.0188
Cpro.50176	chaperonin containing TCP-1 delta subunit	Chro.50193	chaperonin containing TCP-1 delta subunit	0.994	0.0351	0.0025	0.0712251	8.6132
Cpro.50177	hypothetical protein	Chro.50194	hypothetical protein	0.97	0.0841	0.0134	0.159334	9.4134
Cpro.50178	hypothetical protein	Chro.50195	GLP_382_1054_2538	0.949	0.0563	0.0219	0.388988	6.0582
Cpro.50179	related to N-acetylglucosaminyl-phosphatidylinositol biosynthetic protein gpi1	Chro.50196	hypothetical protein	0.976	0.043	0.0104	0.24186	5.1746
Cpro.50180	hypothetical protein	Chro.50197	hypothetical protein	0.97	0.0512	0.0145	0.283203	9.2121
Cpro.50181	hypothetical protein	Chro.50198	zf-CCCH zinc finger protein	0.977	0.049	0.0104	0.212245	14.5412
Cpro.50182	proteasome subunit alpha type 5	Chro.50200	proteasome subunit alpha type 5	0.989	0.0297	0.0047	0.158249	4.6
Cpro.50183	hypothetical protein	Chro.50201	hypothetical protein	0.966	0.044	0.015	0.340909	3.5612
Cpro.50184	hypothetical protein	Chro.50202	hypothetical protein	0.961	0.0713	0.018	0.252454	3.5629
Cpro.50185	hypothetical protein	Chro.50203	hypothetical protein	0.964	0.0299	0.0167	0.558528	7.3052
Cpro.50186	hypothetical protein, conserved	Chro.50204	hypothetical protein	0.978	0.0567	0.0097	0.171076	11.5079
Cpro.50187	GTPase, putative	Chro.50205	GTPase	0.995	0.0549	0.0024	0.0437158	13.3831
Cpro.50188	snornp protein gar1	Chro.50206	small nucleolar RNP proteins\; Gar1p	0.978	0.0766	0.0096	0.125326	3.3254
Cpro.50189	essential protein for meiotic synapsis	Chro.50207	essential protein for meiotic synapsis	0.99	0.1136	0.0043	0.0378521	2.3272
Cpro.50190	unnamed protein product	Chro.50208	hypothetical protein	0.976	0.0498	0.0099	0.198795	20.2475
Cpro.50191	hypothetical protein	Chro.50209	hypothetical protein	0.968	0.1058	0.0145	0.137051	3.9174
Cpro.50192	hypothetical protein	Chro.50210	hypothetical protein	0.928	0.1111	0.0308	0.277228	4.6
Cpro.50193	CTP synthase	Chro.50211	Last step in pyrimidine biosynthesis pathway\; Ura8p	0.994	0.0641	0.0025	0.0390016	2.3705
Cpro.50194	expressed protein	Chro.50212	hypothetical protein	0.961	0.0724	0.0158	0.218232	7.31
Cpro.50195	unknown protein	Chro.50213	hypothetical protein	0.982	0.06	0.0091	0.151667	6.9589
Cpro.50196	hypothetical protein	Chro.50214	ENSANGP00000021996	0.962	0.0385	0.0175	0.454545	12.7848
Cpro.50197	hypothetical protein	Chro.50215	hypothetical protein	1	0.0655	0	0	4.6
Cpro.50198	hypothetical protein	Chro.50216	hypothetical protein	0.967	0.1719	0.0141	0.0820244	3.3912
Cpro.50199	hypothetical protein	Chro.50217	hypothetical protein	0.902	0.0745	0.0434	0.58255	8.9421
Cpro.50200	Drosophila melanogaster CG1349 gene product	Chro.50218	CG1349 gene product	0.978	0.0745	0.0094	0.126174	5.6865
Cpro.50201	MORN repeat protein	Chro.50219	MORN repeat protein	0.997	0.0802	0.0014	0.0174564	3.1775
Cpro.50202	hypothetical protein	Chro.50220	hypothetical protein	0.974	0.0645	0.013	0.20155	28.3273
Cpro.50203	hypothetical protein	Chro.50221	hypothetical protein	0.953	0.0615	0.0228	0.370732	12.5344
Cpro.50204	hypothetical protein	Chro.50222	hypothetical protein	0.972	0.0517	0.0127	0.245648	8.1218
Cpro.50205	Initiation factor 2 subunit family, putative	Chro.50223	hypothetical protein	0.995	0.0244	0.0021	0.0860656	4.6
Cpro.50206	hypothetical protein	Chro.50224	hypothetical protein	0.96	0.0469	0.0176	0.375267	4.6
Cpro.50207	hypothetical protein	Chro.50225	hypothetical protein	0.997	0.0619	0.0016	0.0258481	12.209
Cpro.50208	ribosomal protein L3, putative	Chro.50226	hypothetical protein	0.973	0.0182	0.0121	0.664835	4.6
Cpro.50209	terbinafine resistance locus protein YIP1	Chro.50227	terbinafine resistance locus protein YIP1	0.99	0.0459	0.0043	0.0936819	1.2206
Cpro.50210	hypothetical protein	Chro.50228	hypothetical protein	0.947	0.0508	0.0257	0.505906	7.681
Cpro.50211	hypothetical protein	Chro.50230	hypothetical protein	0.985	0.052	0.0056	0.107692	4.5324
Cpro.50212	hypothetical protein	Chro.50231	hypothetical protein	0.971	0.1061	0.0125	0.117813	5.5639
Cpro.50213	hypothetical protein	Chro.50232	hypothetical protein	0.91	0.0249	0.041	1.64659	3.2643
Cpro.50214	hypothetical protein	Chro.50233	hypothetical protein	0.967	0.037	0.0121	0.327027	3.1183
Cpro.50215	hypothetical protein	Chro.50234	hypothetical protein	0.97	0.0605	0.0147	0.242975	1.1488
Cpro.50216	hypothetical protein	Chro.50235	hypothetical protein	0.98	0.0597	0.0096	0.160804	14.3968
Cpro.50217	hypothetical protein	Chro.50236	hypothetical protein	0.972	0.0655	0.0124	0.189313	9.3722
Cpro.50218	putative nucleoside-diphosphate kinase	Chro.50237	nucleoside-diphosphate kinase	0.955	0.0481	0.0202	0.419958	11.0445
Cpro.50219	hypothetical protein	Chro.50238	hypothetical protein	0.969	0.0584	0.0129	0.22089	8.8113
Cpro.50220	hypothetical protein	Chro.50239	hypothetical protein	0.963	0.0523	0.0171	0.32696	8.3632
Cpro.50221	hypothetical protein	Chro.50240	hypothetical protein	0.969	0.0584	0.0131	0.224315	5.6914
Cpro.50222	hypothetical protein	Chro.50241	hypothetical protein	0.993	0.0668	0.0035	0.0523952	3.4822
Cpro.50223	Nulp1	Chro.50242	hypothetical protein	0.924	0.0952	0.0337	0.353992	4.5434
Cpro.50224	hypothetical protein	Chro.50243	hypothetical protein	0.944	0.0552	0.0235	0.425725	9.0856
Cpro.50225	hypothetical protein, conserved	Chro.50244	hypothetical protein	0.952	0.0311	0.0235	0.755627	8.8998
Cpro.50226	D13	Chro.50245	hypothetical protein	0.972	0.0735	0.0123	0.167347	5.033
Cpro.50227	hypothetical protein	Chro.50246	hypothetical protein	0.944	0.029	0.0262	0.903448	18.2528
Cpro.50228	hypothetical protein	Chro.50247	hypothetical protein	0.962	0.1357	0.0161	0.118644	4.6
Cpro.50229	unknow protein	Chro.50248	hypothetical protein	0.965	0.0614	0.015	0.2443	6.8978
Cpro.50231	similar to NC_001141 protein required for filamentous growth, cell polarity, and cellular elongation; Dfg10p in Saccharomyces cerevisiae	Chro.50250	similar to NC_001141 protein required for filamentous growth, cell polarity, and cellular elongation	0.952	0.0528	0.022	0.416667	8.8162
Cpro.50232	hypothetical protein, conserved	Chro.50251	hypothetical protein	0.988	0.0797	0.0033	0.0414053	2.3158
Cpro.50233	actin-like protein	Chro.50252	actin-like protein	0.965	0.0558	0.0176	0.315412	10.7393
Cpro.50234	hypothetical protein	Chro.50253	hypothetical protein	0.978	0.0286	0.0095	0.332168	4.1121
Cpro.50235	hypothetical protein	Chro.50254	hypothetical protein	0.947	0.0188	0.0275	1.46277	5.2463
Cpro.50236	COG2114: Adenylate cyclase, family 3 (some proteins contain HAMP domain)	Chro.50255	adenylate cyclase	0.981	0.0475	0.0083	0.174737	2.0332
Cpro.50237	hypothetical protein	Chro.50256	hypothetical protein	0.98	0.0624	0.0088	0.141026	6.273
Cpro.50238	unknown protein	Chro.50257	hypothetical protein	0.997	0.0604	0.0012	0.0198675	7.0671
Cpro.50239	DHHC-type zinc finger domain-containing protein	Chro.50258	DHHC-type zinc finger domain-containing protein	0.96	0.0127	0.0186	1.46457	4.6
Cpro.50240	hypothetical protein	Chro.50259	P0695H10.17	0.961	0.0404	0.0176	0.435644	7.2345
Cpro.50241	unnamed protein product	Chro.50260	ENSANGP00000018078	0.971	0.0829	0.0135	0.162847	8.3689
Cpro.50242	hypothetical protein	Chro.50261	hypothetical protein	0.932	0.0367	0.0333	0.907357	11.2519
Cpro.50244	hypothetical protein	Chro.50263	hypothetical protein	0.958	0.051	0.0197	0.386275	5.9241
Cpro.50245	hypothetical protein	Chro.50264	hypothetical protein	0.986	0.0615	0.006	0.097561	4.9432
Cpro.50246	2810480G15Rik protein	Chro.50265	2810480G15Rik protein	0.961	0.0302	0.0173	0.572848	5.4637
Cpro.50247	DNA topoisomerase iii	Chro.50266	DNA topoisomerase iii	0.954	0.0667	0.0199	0.298351	4.7375
Cpro.50248	similar to DNA Topoisomerase III; Top3p	Chro.50267	DNA topoisomerase III	0.976	0.0789	0.0099	0.125475	6.3602
Cpro.50249	ENSANGP00000013258	Chro.50268	ENSANGP00000013258	0.976	0.0779	0.0098	0.125802	4.2884
Cpro.50250	hypothetical protein	Chro.50269	hypothetical protein	0.974	0.045	0.0123	0.273333	8.2291
Cpro.50251	unnamed protein product, putative	Chro.50270	hypothetical protein	0.974	0.0595	0.0113	0.189916	4.5095
Cpro.50252	cinnamyl-alcohol dehydrogenase (EC 1.1.1.195) - cider tree gi|1143445|emb|CAA61275.1| cinnamyl alcohol dehydrogenase	Chro.50271	cinnamyl-alcohol dehydrogenase (EC 1.1.1.195)	0.975	0.0744	0.0108	0.145161	7.2976
Cpro.50253	WD-40 repeat protein family / small nuclear ribonucleoprotein Prp4p-related	Chro.50272	WD-40 repeat protein family / small nuclear ribonucleoprotein Prp4p-related	0.977	0.0645	0.0114	0.176744	6.8158
Cpro.50254	hypothetical protein	Chro.50273	hypothetical protein	0.972	0.0872	0.0123	0.141055	6.696
Cpro.50255	hypothetical protein	Chro.50274	hypothetical protein	0.992	0.1059	0.0032	0.0302172	0.8047
Cpro.50256	hypothetical protein	Chro.50275	hypothetical protein	0.978	0.0782	0.0093	0.118926	3.9334
Cpro.50257	hypothetical protein	Chro.50276	hypothetical protein	0.901	0.0651	0.0443	0.680492	6.1613
Cpro.50259	Drosophila melanogaster GM01605p	Chro.50278	GM01605p	0.984	0.0779	0.0069	0.0885751	4.7183
Cpro.50260	hypothetical protein	Chro.50279	hypothetical protein	0.937	0.0915	0.0293	0.320219	3.8598
Cpro.50261	hypothetical protein	Chro.50280	hypothetical protein	0.986	0.0504	0.0064	0.126984	7.5171
Cpro.50262	hypothetical protein	Chro.50281	hypothetical protein	0.992	0.0628	0.0036	0.0573248	5.0198
Cpro.50263	hypothetical protein	Chro.50282	hypothetical protein	0.977	0.059	0.01	0.169492	5.9003
Cpro.50264	hypothetical protein	Chro.50283	hypothetical protein	0.957	0.0286	0.0174	0.608392	3.9223
Cpro.50265	hypothetical protein	Chro.50284	hypothetical protein	0.99	0.0417	0.0042	0.100719	3.6744
Cpro.50266	hypothetical protein	Chro.50285	hypothetical protein	0.988	0.059	0.0052	0.0881356	9.3053
Cpro.50267	hypothetical protein	Chro.50286	hypothetical protein	0.981	0.065	0.0088	0.135385	21.2575
Cpro.50269	hypothetical protein	Chro.50288	hypothetical protein	0.964	0.0599	0.0155	0.258765	5.8554
Cpro.50270	hypothetical protein	Chro.50289	hypothetical protein	0.929	0.0818	0.0327	0.399756	4.0839
Cpro.50271	60S ribosomal protein L13a gi|7440817|pir||T07166 ribosomal protein L13a - Cyanophora paradoxa gi|1743007|emb|CAA71090.1| ribosomal protein L13a	Chro.50290	60S ribosomal protein L13a	0.995	0.0626	0.0023	0.0367412	4.6
Cpro.50272	hypothetical protein	Chro.50291	hypothetical protein	0.992	0.0469	0.0036	0.0767591	17.7516
Cpro.50273	PINT domain protein (proteasomal subunit) PFB0240w - malaria parasite (Plasmodium falciparum)	Chro.50292	PINT domain protein (proteasomal subunit) PFB0240w	0.993	0.0586	0.0028	0.0477816	1.2475
Cpro.50274	histone H2A variant, putative	Chro.50293	histone H2A variant	1	0.0196	0	0	4.6
Cpro.50275	hypothetical protein	Chro.50294	hypothetical protein	0.988	0.0233	0.0047	0.201717	4.6
Cpro.50276	putative pre-mRNA splicing factor	Chro.50295	pre-mRNA splicing factor	0.972	0.0605	0.0124	0.204959	11.5996
Cpro.50277	hypothetical protein	Chro.50296	hypothetical protein	0.975	0.0785	0.0105	0.133758	13.3369
Cpro.50278	nucleotide-binding protein	Chro.50297	nucleotide-binding protein	0.978	0.0629	0.0092	0.146264	4.6
Cpro.50279	hypothetical protein	Chro.50298	hypothetical protein	0.973	0.0488	0.0112	0.229508	8.0925
Cpro.50280	Nef associated protein 1	Chro.50299	Nef associated protein 1	0.982	0.0994	0.0082	0.082495	13.6087
Cpro.50281	hypothetical protein	Chro.50300	hypothetical protein	0.958	0.085	0.0172	0.202353	2.0825
Cpro.50282	hypothetical protein	Chro.50301	hypothetical protein	0.99	0.0692	0.0042	0.0606936	2.0794
Cpro.50283	Vacuolar ATP synthase subunit F, putative	Chro.50302	vacuolar ATP synthase subunit F,	0.984	0.0694	0.0071	0.102305	4.6
Cpro.50284	serine-threonine phosophatase 2C	Chro.50303	serine-threonine phosophatase 2C	0.986	0.0712	0.0062	0.0870787	4.6
Cpro.50285	hypothetical protein	Chro.50304	hypothetical protein	0.956	0.0466	0.0208	0.446352	40.6087
Cpro.50286	calmodulin-domain protein kinase 1	Chro.50305	calmodulin-domain protein kinase 1	0.998	0.0405	0.0009	0.0222222	16.8002
Cpro.50287	testis specific leucine rich repeat protein	Chro.50306	testis specific leucine rich repeat protein	0.986	0.0718	0.0063	0.0877437	3.603
Cpro.50288	hypothetical protein	Chro.50308	hypothetical protein	0.987	0.0699	0.0054	0.0772532	2.5681
Cpro.50289	Hypothetical protein CBG09285	Chro.50309	hypothetical protein	0.953	0.0496	0.0213	0.429435	4.5152
Cpro.50290	hypothetical protein	Chro.50310	hypothetical protein	0.996	0.0795	0.0016	0.0201258	7.9343
Cpro.50291	hypothetical protein	Chro.50311	hypothetical protein	0.894	0.1487	0.0592	0.398117	2.5255
Cpro.50292	hypothetical protein	Chro.50312	hypothetical protein	0.972	0.0478	0.012	0.251046	4.1188
Cpro.50293	hypothetical protein	Chro.50313	hypothetical protein	0.982	0.0463	0.0078	0.168467	6.3605
Cpro.50294	malic enzyme	Chro.50314	malic enzyme	0.988	0.0625	0.0056	0.0896	23.9681
Cpro.50295	hypothetical protein	Chro.50315	hypothetical protein	1	0	0	None	4.6
Cpro.50296	ENSANGP00000014714	Chro.50316	ENSANGP00000014714	0.985	0.0735	0.0063	0.0857143	3.9967
Cpro.50297	RNA polymerase A/beta'/A'' subunit, putative	Chro.50317	RNA polymerase A/beta'/A'' subunit	0.968	0.0388	0.012	0.309278	16.547
Cpro.50298	dna-directed rna polymerase i 190 kd polypeptide	Chro.50318	DNA-directed RNA polymerase	0.986	0.071	0.0057	0.0802817	5.9729
Cpro.50299	ethanolamine kinase, putative	Chro.50319	choline/ethanolamine kinase	0.982	0.0736	0.007	0.0951087	14.0334
Cpro.50300	GM14490p	Chro.50320	Golgi coiled coil protein GCC185	0.988	0.0397	0.0055	0.138539	3.5318
Cpro.50301	probable ribonucleoprotein - Arabidopsis thaliana gi|2244786|emb|CAB10209.1| ribonucleoprotein like protein	Chro.50321	ribonucleoprotein	1	0.0447	0	0	9.1221
Cpro.50302	UDP-N-acetyl-D-galactosamine:polypeptide N-acetylgalactosaminyltransferase T3	Chro.50322	UDP-N-acetyl-D-galactosamine:polypeptide N-acetylgalactosaminyltransferase T3	0.981	0.0691	0.0095	0.137482	14.5921
Cpro.50303	eukaryotic translation initiation factor 3 37.28 kDa subunit, putative	Chro.50323	eukaryotic translation initiation factor 3 37.28 kDa subunit	1	0.0769	0	0	4.7406
Cpro.50304	Arabidopsis thaliana At5g67630/K9I9_20	Chro.50324	At5g67630/K9I9_20	0.992	0.0715	0.0043	0.0601399	7.2021
Cpro.50305	thioredoxin (trx-4)	Chro.50325	thioredoxin	0.975	0.0408	0.0119	0.291667	8.0043
Cpro.50306	hypothetical protein	Chro.50326	hypothetical protein	0.974	0.0526	0.0123	0.23384	12.8635
Cpro.50307	hypothetical protein, conserved	Chro.50327	hypothetical protein	1	0.0654	0	0	4.6
Cpro.50308	hypothetical protein	Chro.50328	hypothetical protein	0.993	0.0649	0.003	0.046225	7.6777
Cpro.50309	conserved protein, putative	Chro.50329	hypothetical protein	0.983	0.0274	0.0071	0.259124	3.7111
Cpro.50310	leucyl tRNA Synthetase (134.5 kD) (lrs-1)	Chro.50330	leucyl tRNA synthetase (134.5 kD) (lrs-1)	0.996	0.0436	0.0018	0.0412844	4.6
Cpro.50311	ENSANGP00000018304	Chro.50331	KIAA1352 protein	0.956	0.0678	0.0067	0.0988201	2.6039
Cpro.50312	hypothetical protein	Chro.50901	hypothetical protein	0.902	0	0.0107	None	4.6
Cpro.50313	Involved in endocytosis and membrane growth and polarity; Arp2p	Chro.50334	hypothetical protein	0.972	0.0378	0.0058	0.153439	16.9754
Cpro.50314	hypothetical protein	Chro.50335	hypothetical protein	0.947	0.0483	0.0254	0.52588	17.8214
Cpro.50315	hypothetical protein	Chro.50336	hypothetical protein	0.975	0.075	0.0104	0.138667	3.468
Cpro.50316	hypothetical protein	Chro.50337	hypothetical protein	0.983	0.1014	0.0064	0.0631164	2.0312
Cpro.50317	hypothetical protein	Chro.50338	hypothetical protein	0.979	0.0384	0.0086	0.223958	4.6
Cpro.50318	hypothetical protein	Chro.50339	hypothetical protein	0.969	0.063	0.0146	0.231746	4.9785
Cpro.50319	V-type ATPase, D subunit	Chro.50340	vacuolar ATP synthase subunit D	0.986	0.1074	0.0063	0.0586592	15.7576
Cpro.50320	Unknown (protein for MGC:55395)	Chro.50341	cancer-associated gene protein like (41.3 kD) (4A872)	0.99	0.0713	0.0038	0.0532959	1.9451
Cpro.50321	hypothetical protein	Chro.50342	hypothetical protein	0.97	0.0529	0.012	0.226843	5.7636
Cpro.50322	expressed protein	Chro.50343	hypothetical protein	0.976	0.0579	0.0083	0.143351	6.0499
Cpro.50323	Unknown (protein for MGC:77781)	Chro.50344	MGC4171 protein	0.989	0.0621	0.0043	0.0692432	2.5002
Cpro.50324	hypothetical protein	Chro.50345	hypothetical protein	0.979	0.0591	0.0082	0.138748	1.9904
Cpro.50326	hypothetical protein	Chro.50347	hypothetical protein	0.976	0.0905	0.0089	0.0983425	9.9081
Cpro.50327	RING zinc finger protein -related	Chro.50348	RING zinc finger protein -related	0.886	0.0937	0.0139	0.148346	4.5122
Cpro.50329	LD24380p	Chro.50350	LD24380p	0.983	0.0482	0.007	0.145228	3.8189
Cpro.50330	hypothetical protein	Chro.50351	hypothetical protein	0.964	0.0925	0.0112	0.121081	10.818
Cpro.50331	Rad51 homolog	Chro.50352	Rad51	0.997	0.0826	0.0012	0.0145278	10.4283
Cpro.50332	hypothetical protein	Chro.50353	hypothetical protein	0.963	0.1001	0.0149	0.148851	6.8372
Cpro.50333	eukaryotic translation initiation factor 3 subunit 10, putative	Chro.50354	hypothetical protein	0.995	0.1192	0	0	6.9165
Cpro.50334	hypothetical protein	Chro.50355	hypothetical protein	0.983	0.037	0.0068	0.183784	2.0622
Cpro.50335	hypothetical protein	Chro.50356	hypothetical protein	0.957	0.1253	0.0128	0.102155	2.2485
Cpro.50336	hypothetical protein, conserved	Chro.50357	hypothetical protein	0.965	0.1398	0.0124	0.0886981	2.6971
Cpro.50337	hypothetical protein	Chro.50358	hypothetical protein	0.952	0.0362	0.0215	0.593923	0.774
Cpro.50341	hypothetical protein	Chro.50362	hypothetical protein	0.979	0.1197	0.0061	0.0509607	6.8796
Cpro.50342	hypothetical protein	Chro.50363	hypothetical protein	0.971	0.1274	0.0095	0.0745683	4.6
Cpro.50349	serine/threonine kinase-1	Chro.50371	serine/threonine kinase-1	0.968	0.1012	0.0101	0.0998024	4.3531
Cpro.50350	G-patch domain, putative	Chro.50372	hypothetical protein	0.991	0.1355	0.0033	0.0243542	4.6
Cpro.50351	hypothetical protein	Chro.50373	hypothetical protein	1	0.0849	0	0	4.6
Cpro.50352	hypothetical malaria antigen	Chro.50374	hypothetical protein	0.965	0.1022	0.0123	0.120352	3.5835
Cpro.50356	CG3887-PA	Chro.50378	CG3887-PA	0.995	0.0625	0.0019	0.0304	4.6
Cpro.50357	hypothetical protein	Chro.50379	hypothetical protein	0.967	0.1066	0.0074	0.0694184	4.6
Cpro.50358	hypothetical protein	Chro.50380	hypothetical protein	0.988	0.0912	0.0025	0.0274123	7.0928
Cpro.50359	hypothetical protein	Chro.50381	DNA helicase	0.988	0.0847	0.0054	0.0637544	2.3478
Cpro.50360	hypothetical protein	Chro.50383	hypothetical protein	0.985	0.094	0.0079	0.0840426	2.5357
Cpro.50361	hypothetical protein, conserved	Chro.50384	hypothetical protein	0.985	0.0913	0.0061	0.0668127	6.0785
Cpro.50362	Similar to CDC5 cell division cycle 5-like (S. pombe)	Chro.50385	CDC5 cell division cycle 5-like (S. pombe)	0.985	0.0683	0.0065	0.0951684	5.995
Cpro.50363	similar to Homo sapiens (Human). PM-scl autoantigen	Chro.50386	hypothetical protein	0.977	0.0572	0.0099	0.173077	10.3062
Cpro.50364	hypothetical protein	Chro.50387	hypothetical protein	0.966	0.0889	0.0166	0.186727	10.8329
Cpro.50365	hypothetical protein	Chro.50388	hypothetical protein	0.938	0.0175	0.0305	1.74286	4.4546
Cpro.50366	phosphoenolpyruvate carboxylase, putative	Chro.50389	phosphoenolpyruvate carboxylase	0.989	0.0684	0.005	0.0730994	20.7026
Cpro.50367	centrin	Chro.50390	centrin	1	0.0429	0	0	4.6
Cpro.50368	hypothetical protein	Chro.50391	hypothetical protein	0.82	0.095	0.0953	1.00316	5.4452
Cpro.50369	hypothetical protein	Chro.50392	hypothetical protein	0.72	0.1254	0.101	0.805423	5.6227
Cpro.50371	hypothetical protein	Chro.50394	hypothetical protein	0.891	0.1076	0.0548	0.509294	4.9068
Cpro.50372	hypothetical protein	Chro.50395	hypothetical protein	0.87	0.0854	0.0557	0.652225	5.6697
Cpro.50374	hypothetical protein	Chro.50397	hypothetical protein	0.939	0.0547	0.0133	0.243144	5.5246
Cpro.50375	thymidine kinase	Chro.50398	thymidine kinase	0.979	0.0725	0.0086	0.118621	4.6
Cpro.50376	transducin / WD-40 repeat protein family	Chro.50399	transducin / WD-40 repeat protein family	0.978	0.0555	0.0087	0.156757	6.6722
Cpro.50377	hypothetical protein, conserved	Chro.50400	hypothetical protein	0.966	0.0993	0.0112	0.11279	3.7773
Cpro.50378	hypothetical protein	Chro.50401	hypothetical protein	0.946	0.0722	0.0172	0.238227	11.2829
Cpro.50379	arginyl-tRNA synthetase, putative	Chro.50402	RIKEN cDNA 2610011N19 gene	0.976	0.0773	0.0097	0.125485	5.3021
[truncated: 1,704 more rows]
