# Supplementary material for: Comparative Genomics of Cryptosporidium
Source: Int J Genomics. 2013 May 2;2013:832756. doi: 10.1155/2013/832756 (PMC3659464; doi:10.1155/2013/832756)
Supplement: Supplementary file 1 — Supplementary Figure 1: Synteny of Plasmodia and Cryptosporidia genus Position of the orthologs identified in the genomes of C. parvum, P. falciparum, P. knowlesi and P. vivax. For each pair of species, a green cross denotes an ortholog present in the same strand in both genomes, while a red cross denotes an inversion. Supplementary Figure 2: Genome Compactness Comparison of the genome compactness of well-studied apicomplexans, as the average number of putative paralogs per genes. Supplementary Figure 3: Pathway Scores See Figure 1. Supplementary Table 1: Chromosomes Composition Results of the statistical evaluation performed using the Fisher's exact test of the enrichment of the Plasmodia chromosomes in orthologs identified in C. parvum. Values of enrichment are given as the log2 of the ratio between the fraction of orthologs in a given Plasmodium chromosome coming from a same chromosome of C. parvum, and the fraction of orthologs in the whole Plasmodium genome coming from this C. parvum chromosome. A value of 0 (ratio of 1) means that the Plasmodium chromosome contains proportionally as many orthologs from the C. parvum chromosome considered as in the whole genome. The values obtained show that the Plasmodium chromosomes significantly retain the composition of the C. parvum chromosomes. P-values below 0.05 were discarded. Supplementary Table 2: Pathway Scores Completeness, connectedness and support scores of the inferred metabolic pathways of C. hominis and C. parvum, along with nine other apicomplexans and an external reference, S. cerevisiae (see text). Supplementary Table 3: Orthologs Sequence Comparison Results of the pairs of putative orthologs sequences comparisons. Identity: percentage of identity between the two protein sequences. dN/dS: non-synonymous on synonymous substitution rate ratio, or None if undefined (when dS equals to zero). Ti/Tv: transition on transversion ratio. Supplementary Table 4: Protein Localizations Predicted protein localization, bas [file 832756.f1.zip › supplementary_table_4-protein_localizations.xls]

## Sheet: Sheet1
Identifier	Predicted localization
Chro.10010	Membrane-bound
Chro.10011	Membrane-bound
Chro.10012	Membrane-bound
Chro.10013	Membrane-bound
Chro.10014	Cytoplasmic
Chro.10015	Cytoplasmic
Chro.10016	Cytoplasmic
Chro.10017	Membrane-bound
Chro.10018	Cytoplasmic
Chro.10019	Cytoplasmic
Chro.10021	Secreted
Chro.10022	Secreted
Chro.10023	Cytoplasmic
Chro.10024	Cytoplasmic
Chro.10026	Cytoplasmic
Chro.10027	Cytoplasmic
Chro.10028	Cytoplasmic
Chro.10029	Cytoplasmic
Chro.10030	Cytoplasmic
Chro.10031	Membrane-bound
Chro.10032	Membrane-bound
Chro.10033	Membrane-bound
Chro.10034	Cytoplasmic
Chro.10035	Cytoplasmic
Chro.10036	Secreted
Chro.10038	Cytoplasmic
Chro.10039	Membrane-bound
Chro.10040	Cytoplasmic
Chro.10041	Cytoplasmic
Chro.10042	Cytoplasmic
Chro.10043	Cytoplasmic
Chro.10044	Cytoplasmic
Chro.10045	Cytoplasmic
Chro.10046	Cytoplasmic
Chro.10047	Membrane-bound
Chro.10049	Cytoplasmic
Chro.10050	Cytoplasmic
Chro.10051	Membrane-bound
Chro.10052	Cytoplasmic
Chro.10053	Cytoplasmic
Chro.10054	Cytoplasmic
Chro.10055	Cytoplasmic
Chro.10056	Cytoplasmic
Chro.10057	Membrane-bound
Chro.10058	Cytoplasmic
Chro.10059	Cytoplasmic
Chro.10060	Cytoplasmic
Chro.10061	Cytoplasmic
Chro.10062	Membrane-bound
Chro.10063	Membrane-bound
Chro.10065	Cytoplasmic
Chro.10066	Cytoplasmic
Chro.10067	Cytoplasmic
Chro.10068	Membrane-bound
Chro.10069	Cytoplasmic
Chro.10070	Secreted
Chro.10071	Cytoplasmic
Chro.10072	Cytoplasmic
Chro.10073	Cytoplasmic
Chro.10074	Membrane-bound
Chro.10075	Cytoplasmic
Chro.10076	Cytoplasmic
Chro.10078	Cytoplasmic
Chro.10079	Membrane-bound
Chro.10080	Membrane-bound
Chro.10081	Cytoplasmic
Chro.10082	Cytoplasmic
Chro.10084	Membrane-bound
Chro.10086	Cytoplasmic
Chro.10089	Secreted
Chro.10091	Cytoplasmic
Chro.10092	Cytoplasmic
Chro.10094	Cytoplasmic
Chro.10095	Cytoplasmic
Chro.10096	Cytoplasmic
Chro.10097	Membrane-bound
Chro.10098	Cytoplasmic
Chro.10099	Secreted
Chro.10100	Cytoplasmic
Chro.10101	Membrane-bound
Chro.10103	Cytoplasmic
Chro.10105	Cytoplasmic
Chro.10106	Cytoplasmic
Chro.10107	Secreted
Chro.10108	Cytoplasmic
Chro.10109	Membrane-bound
Chro.10110	Cytoplasmic
Chro.10111	Cytoplasmic
Chro.10112	Cytoplasmic
Chro.10115	Membrane-bound
Chro.10118	Cytoplasmic
Chro.10119	Cytoplasmic
Chro.10120	Membrane-bound
Chro.10121	Cytoplasmic
Chro.10122	Cytoplasmic
Chro.10123	Cytoplasmic
Chro.10124	Cytoplasmic
Chro.10125	Cytoplasmic
Chro.10126	Cytoplasmic
Chro.10127	Cytoplasmic
Chro.10128	Cytoplasmic
Chro.10129	Cytoplasmic
Chro.10130	Cytoplasmic
Chro.10131	Membrane-bound
Chro.10133	Membrane-bound
Chro.10134	Cytoplasmic
Chro.10135	Cytoplasmic
Chro.10136	Cytoplasmic
Chro.10137	Cytoplasmic
Chro.10138	Secreted
Chro.10139	Cytoplasmic
Chro.10140	Cytoplasmic
Chro.10141	Cytoplasmic
Chro.10142	Cytoplasmic
Chro.10143	Cytoplasmic
Chro.10144	Secreted
Chro.10145	Cytoplasmic
Chro.10146	Membrane-bound
Chro.10147	Cytoplasmic
Chro.10148	Cytoplasmic
Chro.10149	Cytoplasmic
Chro.10150	Membrane-bound
Chro.10151	Cytoplasmic
Chro.10152	Cytoplasmic
Chro.10153	Cytoplasmic
Chro.10154	Cytoplasmic
Chro.10155	Cytoplasmic
Chro.10156	Cytoplasmic
Chro.10157	Membrane-bound
Chro.10158	Cytoplasmic
Chro.10159	Cytoplasmic
Chro.10160	Membrane-bound
Chro.10161	Cytoplasmic
Chro.10162	Cytoplasmic
Chro.10163	Cytoplasmic
Chro.10164	Cytoplasmic
Chro.10165	Secreted
Chro.10166	Cytoplasmic
Chro.10167	Membrane-bound
Chro.10168	Cytoplasmic
Chro.10170	Membrane-bound
Chro.10171	Membrane-bound
Chro.10172	Cytoplasmic
Chro.10173	Cytoplasmic
Chro.10174	Membrane-bound
Chro.10176	Cytoplasmic
Chro.10177	Cytoplasmic
Chro.10178	Cytoplasmic
Chro.10179	Cytoplasmic
Chro.10180	Cytoplasmic
Chro.10181	Cytoplasmic
Chro.10182	Cytoplasmic
Chro.10183	Cytoplasmic
Chro.10184	Cytoplasmic
Chro.10185	Cytoplasmic
Chro.10186	Cytoplasmic
Chro.10187	Cytoplasmic
Chro.10189	Cytoplasmic
Chro.10190	Cytoplasmic
Chro.10191	Cytoplasmic
Chro.10192	Cytoplasmic
Chro.10193	Cytoplasmic
Chro.10194	Cytoplasmic
Chro.10195	Cytoplasmic
Chro.10196	Membrane-bound
Chro.10198	Cytoplasmic
Chro.10199	Secreted
Chro.10200	Membrane-bound
Chro.10201	Membrane-bound
Chro.10202	Membrane-bound
Chro.10203	Cytoplasmic
Chro.10204	Membrane-bound
Chro.10205	Cytoplasmic
Chro.10206	Cytoplasmic
Chro.10207	Cytoplasmic
Chro.10208	Membrane-bound
Chro.10209	Cytoplasmic
Chro.10210	Cytoplasmic
Chro.10211	Cytoplasmic
Chro.10212	Membrane-bound
Chro.10213	Cytoplasmic
Chro.10214	Cytoplasmic
Chro.10215	Membrane-bound
Chro.10216	Cytoplasmic
Chro.10217	Cytoplasmic
Chro.10218	Cytoplasmic
Chro.10221	Cytoplasmic
Chro.10222	Cytoplasmic
Chro.10223	Cytoplasmic
Chro.10224	Cytoplasmic
Chro.10225	Cytoplasmic
Chro.10226	Membrane-bound
Chro.10227	Cytoplasmic
Chro.10228	Cytoplasmic
Chro.10229	Cytoplasmic
Chro.10230	Cytoplasmic
Chro.10232	Membrane-bound
Chro.10233	Membrane-bound
Chro.10234	Cytoplasmic
Chro.10235	Cytoplasmic
Chro.10236	Cytoplasmic
Chro.10237	Cytoplasmic
Chro.10238	Membrane-bound
Chro.10239	Cytoplasmic
Chro.10240	Membrane-bound
Chro.10241	Membrane-bound
Chro.10243	Cytoplasmic
Chro.10244	Cytoplasmic
Chro.10245	Cytoplasmic
Chro.10246	Cytoplasmic
Chro.10247	Cytoplasmic
Chro.10248	Cytoplasmic
Chro.10249	Cytoplasmic
Chro.10250	Membrane-bound
Chro.10251	Cytoplasmic
Chro.10252	Cytoplasmic
Chro.10253	Cytoplasmic
Chro.10254	Cytoplasmic
Chro.10255	Secreted
Chro.10256	Cytoplasmic
Chro.10257	Cytoplasmic
Chro.10258	Cytoplasmic
Chro.10259	Cytoplasmic
Chro.10260	Membrane-bound
Chro.10261	Cytoplasmic
Chro.10262	Cytoplasmic
Chro.10263	Cytoplasmic
Chro.10264	Cytoplasmic
Chro.10265	Cytoplasmic
Chro.10266	Membrane-bound
Chro.10267	Cytoplasmic
Chro.10268	Membrane-bound
Chro.10269	Secreted
Chro.10270	Cytoplasmic
Chro.10271	Cytoplasmic
Chro.10272	Cytoplasmic
Chro.10273	Cytoplasmic
Chro.10274	Membrane-bound
Chro.10275	Membrane-bound
Chro.10276	Cytoplasmic
Chro.10277	Cytoplasmic
Chro.10278	Cytoplasmic
Chro.10279	Cytoplasmic
Chro.10280	Cytoplasmic
Chro.10281	Membrane-bound
Chro.10282	Cytoplasmic
Chro.10284	Cytoplasmic
Chro.10285	Cytoplasmic
Chro.10286	Membrane-bound
Chro.10287	Cytoplasmic
Chro.10288	Cytoplasmic
Chro.10289	Cytoplasmic
Chro.10290	Cytoplasmic
Chro.10291	Cytoplasmic
Chro.10294	Cytoplasmic
Chro.10296	Membrane-bound
Chro.10297	Cytoplasmic
Chro.10298	Cytoplasmic
Chro.10299	Cytoplasmic
Chro.10300	Cytoplasmic
Chro.10301	Cytoplasmic
Chro.10302	Cytoplasmic
Chro.10303	Cytoplasmic
Chro.10304	Cytoplasmic
Chro.10305	Cytoplasmic
Chro.10306	Cytoplasmic
Chro.10307	Cytoplasmic
Chro.10308	Cytoplasmic
Chro.10309	Cytoplasmic
Chro.10310	Cytoplasmic
Chro.10311	Cytoplasmic
Chro.10312	Cytoplasmic
Chro.10313	Membrane-bound
Chro.10314	Cytoplasmic
Chro.10315	Cytoplasmic
Chro.10316	Cytoplasmic
Chro.10317	Membrane-bound
Chro.10318	Cytoplasmic
Chro.10319	Cytoplasmic
Chro.10320	Cytoplasmic
Chro.10321	Secreted
Chro.10322	Cytoplasmic
Chro.10323	Cytoplasmic
Chro.10324	Cytoplasmic
Chro.10325	Membrane-bound
Chro.10326	Cytoplasmic
Chro.10327	Cytoplasmic
Chro.10328	Cytoplasmic
Chro.10329	Cytoplasmic
Chro.10330	Membrane-bound
Chro.10331	Cytoplasmic
Chro.10332	Cytoplasmic
Chro.10333	Cytoplasmic
Chro.10334	Membrane-bound
Chro.10335	Cytoplasmic
Chro.10336	Cytoplasmic
Chro.10337	Cytoplasmic
Chro.10338	Membrane-bound
Chro.10339	Cytoplasmic
Chro.10340	Secreted
Chro.10343	Cytoplasmic
Chro.10345	Cytoplasmic
Chro.10346	Cytoplasmic
Chro.10348	Cytoplasmic
Chro.10349	Cytoplasmic
Chro.10350	Cytoplasmic
Chro.10351	Cytoplasmic
Chro.10352	Cytoplasmic
Chro.10354	Cytoplasmic
Chro.10355	Cytoplasmic
Chro.10356	Cytoplasmic
Chro.10357	Cytoplasmic
Chro.10358	Cytoplasmic
Chro.10359	Membrane-bound
Chro.10360	Cytoplasmic
Chro.10362	Cytoplasmic
Chro.10363	Cytoplasmic
Chro.10364	Cytoplasmic
Chro.10365	Membrane-bound
Chro.10366	Cytoplasmic
Chro.10371	Membrane-bound
Chro.10372	Cytoplasmic
Chro.10373	Cytoplasmic
Chro.10374	Cytoplasmic
Chro.10375	Cytoplasmic
Chro.10376	Cytoplasmic
Chro.10377	Cytoplasmic
Chro.10378	Cytoplasmic
Chro.10380	Membrane-bound
Chro.10381	Cytoplasmic
Chro.10382	Cytoplasmic
Chro.10383	Cytoplasmic
Chro.10384	Cytoplasmic
Chro.10385	Cytoplasmic
Chro.10386	Cytoplasmic
Chro.10387	Cytoplasmic
Chro.10388	Cytoplasmic
Chro.10389	Membrane-bound
Chro.10390	Membrane-bound
Chro.10391	Membrane-bound
Chro.10392	Cytoplasmic
Chro.10393	Cytoplasmic
Chro.10394	Cytoplasmic
Chro.10395	Cytoplasmic
Chro.10397	Cytoplasmic
Chro.10398	Cytoplasmic
Chro.10401	Cytoplasmic
Chro.10402	Membrane-bound
Chro.10403	Membrane-bound
Chro.10404	Cytoplasmic
Chro.10406	Membrane-bound
Chro.10407	Cytoplasmic
Chro.10408	Cytoplasmic
Chro.10410	Secreted
Chro.10411	Membrane-bound
Chro.10412	Cytoplasmic
Chro.10413	Cytoplasmic
Chro.10415	Cytoplasmic
Chro.10416	Membrane-bound
Chro.10417	Cytoplasmic
Chro.10418	Cytoplasmic
Chro.10419	Membrane-bound
Chro.10420	Cytoplasmic
Chro.10421	Membrane-bound
Chro.10422	Cytoplasmic
Chro.10423	Cytoplasmic
Chro.10424	Secreted
Chro.10425	Cytoplasmic
Chro.10426	Cytoplasmic
Chro.10427	Membrane-bound
Chro.10429	Membrane-bound
Chro.10430	Secreted
Chro.10431	Cytoplasmic
Chro.10432	Membrane-bound
Chro.10433	Cytoplasmic
Chro.20010	Cytoplasmic
Chro.20011	Secreted
Chro.20012	Cytoplasmic
Chro.20013	Cytoplasmic
Chro.20014	Membrane-bound
Chro.20017	Membrane-bound
Chro.20019	Cytoplasmic
Chro.20020	Secreted
Chro.20021	Cytoplasmic
Chro.20022	Cytoplasmic
Chro.20023	Cytoplasmic
Chro.20024	Cytoplasmic
Chro.20025	Membrane-bound
Chro.20026	Cytoplasmic
Chro.20028	Membrane-bound
Chro.20029	Cytoplasmic
Chro.20030	Cytoplasmic
Chro.20031	Cytoplasmic
Chro.20032	Cytoplasmic
Chro.20033	Cytoplasmic
Chro.20034	Cytoplasmic
Chro.20035	Cytoplasmic
Chro.20036	Cytoplasmic
Chro.20037	Cytoplasmic
Chro.20038	Cytoplasmic
Chro.20039	Membrane-bound
Chro.20040	Cytoplasmic
Chro.20041	Cytoplasmic
Chro.20043	Cytoplasmic
Chro.20044	Cytoplasmic
Chro.20045	Cytoplasmic
Chro.20046	Membrane-bound
Chro.20047	Membrane-bound
Chro.20048	Secreted
Chro.20049	Secreted
Chro.20050	Secreted
Chro.20051	Secreted
Chro.20052	Cytoplasmic
Chro.20054	Cytoplasmic
Chro.20055	Cytoplasmic
Chro.20056	Cytoplasmic
Chro.20057	Cytoplasmic
Chro.20059	Cytoplasmic
Chro.20060	Membrane-bound
Chro.20061	Cytoplasmic
Chro.20062	Membrane-bound
Chro.20063	Membrane-bound
Chro.20064	Membrane-bound
Chro.20065	Cytoplasmic
Chro.20066	Cytoplasmic
Chro.20067	Membrane-bound
Chro.20068	Cytoplasmic
Chro.20069	Cytoplasmic
Chro.20070	Membrane-bound
Chro.20071	Membrane-bound
Chro.20073	Cytoplasmic
Chro.20074	Membrane-bound
Chro.20075	Membrane-bound
Chro.20077	Cytoplasmic
Chro.20079	Cytoplasmic
Chro.20080	Cytoplasmic
Chro.20081	Cytoplasmic
Chro.20082	Cytoplasmic
Chro.20083	Cytoplasmic
Chro.20085	Cytoplasmic
Chro.20086	Cytoplasmic
Chro.20087	Cytoplasmic
Chro.20088	Cytoplasmic
Chro.20089	Cytoplasmic
Chro.20090	Secreted
Chro.20091	Membrane-bound
Chro.20092	Cytoplasmic
Chro.20093	Cytoplasmic
Chro.20094	Membrane-bound
Chro.20095	Membrane-bound
Chro.20096	Membrane-bound
Chro.20097	Cytoplasmic
Chro.20098	Cytoplasmic
Chro.20099	Cytoplasmic
Chro.20100	Membrane-bound
Chro.20101	Cytoplasmic
Chro.20102	Cytoplasmic
Chro.20103	Cytoplasmic
Chro.20104	Cytoplasmic
Chro.20105	Membrane-bound
Chro.20106	Cytoplasmic
Chro.20107	Cytoplasmic
Chro.20108	Cytoplasmic
Chro.20109	Cytoplasmic
Chro.20110	Cytoplasmic
Chro.20111	Cytoplasmic
Chro.20112	Cytoplasmic
Chro.20113	Cytoplasmic
Chro.20114	Cytoplasmic
Chro.20115	Membrane-bound
Chro.20116	Cytoplasmic
Chro.20117	Membrane-bound
Chro.20118	Cytoplasmic
Chro.20119	Cytoplasmic
Chro.20120	Cytoplasmic
Chro.20121	Membrane-bound
Chro.20122	Cytoplasmic
Chro.20123	Cytoplasmic
Chro.20124	Membrane-bound
Chro.20125	Cytoplasmic
Chro.20126	Membrane-bound
Chro.20127	Cytoplasmic
Chro.20128	Cytoplasmic
Chro.20129	Cytoplasmic
Chro.20130	Cytoplasmic
Chro.20131	Cytoplasmic
Chro.20132	Membrane-bound
Chro.20133	Cytoplasmic
Chro.20134	Cytoplasmic
Chro.20135	Cytoplasmic
Chro.20136	Cytoplasmic
Chro.20137	Cytoplasmic
Chro.20138	Cytoplasmic
Chro.20139	Membrane-bound
Chro.20140	Cytoplasmic
Chro.20141	Membrane-bound
Chro.20142	Cytoplasmic
Chro.20143	Membrane-bound
Chro.20144	Cytoplasmic
Chro.20145	Cytoplasmic
Chro.20146	Cytoplasmic
Chro.20147	Cytoplasmic
Chro.20148	Cytoplasmic
Chro.20149	Cytoplasmic
Chro.20150	Cytoplasmic
Chro.20151	Cytoplasmic
Chro.20152	Cytoplasmic
Chro.20153	Cytoplasmic
Chro.20154	Cytoplasmic
Chro.20155	Cytoplasmic
Chro.20156	Membrane-bound
Chro.20157	Cytoplasmic
Chro.20158	Cytoplasmic
Chro.20159	Membrane-bound
Chro.20160	Cytoplasmic
Chro.20161	Cytoplasmic
Chro.20162	Cytoplasmic
Chro.20163	Membrane-bound
Chro.20164	Cytoplasmic
Chro.20165	Cytoplasmic
Chro.20166	Membrane-bound
Chro.20167	Cytoplasmic
Chro.20168	Cytoplasmic
Chro.20169	Cytoplasmic
Chro.20170	Membrane-bound
Chro.20171	Cytoplasmic
Chro.20173	Membrane-bound
Chro.20174	Cytoplasmic
Chro.20175	Cytoplasmic
Chro.20176	Cytoplasmic
Chro.20178	Cytoplasmic
Chro.20179	Membrane-bound
Chro.20180	Cytoplasmic
Chro.20181	Cytoplasmic
Chro.20182	Cytoplasmic
Chro.20183	Membrane-bound
Chro.20184	Cytoplasmic
Chro.20185	Membrane-bound
Chro.20186	Cytoplasmic
Chro.20187	Cytoplasmic
Chro.20188	Cytoplasmic
Chro.20189	Cytoplasmic
Chro.20190	Cytoplasmic
Chro.20191	Cytoplasmic
Chro.20192	Cytoplasmic
Chro.20193	Secreted
Chro.20194	Cytoplasmic
Chro.20195	Cytoplasmic
Chro.20196	Cytoplasmic
Chro.20197	Cytoplasmic
Chro.20198	Cytoplasmic
Chro.20199	Cytoplasmic
Chro.20200	Secreted
Chro.20201	Cytoplasmic
Chro.20202	Cytoplasmic
Chro.20203	Cytoplasmic
Chro.20204	Cytoplasmic
Chro.20205	Cytoplasmic
Chro.20206	Cytoplasmic
Chro.20207	Cytoplasmic
Chro.20208	Cytoplasmic
Chro.20210	Cytoplasmic
Chro.20211	Cytoplasmic
Chro.20212	Cytoplasmic
Chro.20213	Cytoplasmic
Chro.20214	Cytoplasmic
Chro.20215	Cytoplasmic
Chro.20216	Membrane-bound
Chro.20217	Membrane-bound
Chro.20218	Membrane-bound
Chro.20219	Cytoplasmic
Chro.20220	Cytoplasmic
Chro.20221	Cytoplasmic
Chro.20222	Cytoplasmic
Chro.20223	Cytoplasmic
Chro.20224	Cytoplasmic
Chro.20225	Cytoplasmic
Chro.20227	Cytoplasmic
Chro.20228	Membrane-bound
Chro.20229	Membrane-bound
Chro.20231	Cytoplasmic
Chro.20232	Membrane-bound
Chro.20233	Membrane-bound
Chro.20234	Cytoplasmic
Chro.20235	Membrane-bound
Chro.20236	Membrane-bound
Chro.20237	Cytoplasmic
Chro.20238	Cytoplasmic
Chro.20239	Cytoplasmic
Chro.20240	Cytoplasmic
Chro.20241	Cytoplasmic
Chro.20242	Cytoplasmic
Chro.20243	Membrane-bound
Chro.20244	Cytoplasmic
Chro.20245	Cytoplasmic
Chro.20246	Cytoplasmic
Chro.20247	Cytoplasmic
Chro.20248	Membrane-bound
Chro.20249	Cytoplasmic
Chro.20251	Cytoplasmic
Chro.20252	Cytoplasmic
Chro.20253	Cytoplasmic
Chro.20254	Cytoplasmic
Chro.20255	Cytoplasmic
Chro.20256	Membrane-bound
Chro.20257	Membrane-bound
Chro.20258	Membrane-bound
Chro.20259	Cytoplasmic
Chro.20260	Secreted
Chro.20261	Cytoplasmic
Chro.20262	Membrane-bound
Chro.20263	Cytoplasmic
Chro.20264	Membrane-bound
Chro.20265	Cytoplasmic
Chro.20266	Cytoplasmic
Chro.20267	Cytoplasmic
Chro.20268	Membrane-bound
Chro.20269	Cytoplasmic
Chro.20270	Cytoplasmic
Chro.20272	Cytoplasmic
Chro.20273	Secreted
Chro.20274	Membrane-bound
Chro.20276	Cytoplasmic
Chro.20277	Cytoplasmic
Chro.20278	Membrane-bound
Chro.20279	Cytoplasmic
Chro.20280	Membrane-bound
Chro.20281	Cytoplasmic
Chro.20282	Membrane-bound
Chro.20283	Membrane-bound
Chro.20284	Membrane-bound
Chro.20285	Membrane-bound
Chro.20286	Cytoplasmic
Chro.20287	Cytoplasmic
Chro.20288	Membrane-bound
Chro.20289	Cytoplasmic
Chro.20290	Cytoplasmic
Chro.20291	Cytoplasmic
Chro.20292	Cytoplasmic
Chro.20293	Cytoplasmic
Chro.20294	Cytoplasmic
Chro.20295	Cytoplasmic
Chro.20296	Cytoplasmic
Chro.20297	Cytoplasmic
Chro.20298	Cytoplasmic
Chro.20299	Cytoplasmic
Chro.20300	Membrane-bound
Chro.20301	Cytoplasmic
Chro.20302	Cytoplasmic
Chro.20303	Cytoplasmic
Chro.20304	Cytoplasmic
Chro.20305	Cytoplasmic
Chro.20306	Membrane-bound
Chro.20307	Cytoplasmic
Chro.20308	Cytoplasmic
Chro.20309	Cytoplasmic
Chro.20310	Cytoplasmic
Chro.20311	Cytoplasmic
Chro.20312	Cytoplasmic
Chro.20313	Cytoplasmic
Chro.20314	Cytoplasmic
Chro.20315	Cytoplasmic
Chro.20317	Cytoplasmic
Chro.20318	Cytoplasmic
Chro.20320	Cytoplasmic
Chro.20321	Cytoplasmic
Chro.20322	Cytoplasmic
Chro.20323	Membrane-bound
Chro.20324	Secreted
Chro.20325	Membrane-bound
Chro.20326	Membrane-bound
Chro.20327	Membrane-bound
Chro.20329	Membrane-bound
Chro.20330	Cytoplasmic
Chro.20331	Cytoplasmic
Chro.20332	Cytoplasmic
Chro.20333	Cytoplasmic
Chro.20334	Cytoplasmic
Chro.20335	Cytoplasmic
Chro.20336	Cytoplasmic
Chro.20337	Cytoplasmic
Chro.20338	Cytoplasmic
Chro.20339	Secreted
Chro.20341	Cytoplasmic
Chro.20342	Cytoplasmic
Chro.20343	Cytoplasmic
Chro.20345	Secreted
Chro.20346	Cytoplasmic
Chro.20347	Cytoplasmic
Chro.20348	Secreted
Chro.20349	Secreted
Chro.20350	Cytoplasmic
Chro.20351	Cytoplasmic
Chro.20353	Secreted
Chro.20355	Cytoplasmic
Chro.20356	Cytoplasmic
Chro.20357	Cytoplasmic
Chro.20360	Cytoplasmic
Chro.20361	Cytoplasmic
Chro.20362	Cytoplasmic
Chro.20363	Membrane-bound
Chro.20365	Cytoplasmic
Chro.20366	Cytoplasmic
Chro.20367	Cytoplasmic
Chro.20368	Membrane-bound
Chro.20369	Membrane-bound
Chro.20370	Cytoplasmic
Chro.20371	Membrane-bound
Chro.20372	Cytoplasmic
Chro.20373	Secreted
Chro.20375	Secreted
Chro.20376	Cytoplasmic
Chro.20379	Cytoplasmic
Chro.20381	Cytoplasmic
Chro.20382	Cytoplasmic
Chro.20383	Cytoplasmic
Chro.20385	Cytoplasmic
Chro.20386	Cytoplasmic
Chro.20387	Cytoplasmic
Chro.20388	Cytoplasmic
Chro.20389	Cytoplasmic
Chro.20390	Cytoplasmic
Chro.20392	Cytoplasmic
Chro.20393	Cytoplasmic
Chro.20394	Cytoplasmic
Chro.20395	Cytoplasmic
Chro.20396	Cytoplasmic
Chro.20397	Cytoplasmic
Chro.20398	Membrane-bound
Chro.20399	Membrane-bound
Chro.20400	Membrane-bound
Chro.20401	Cytoplasmic
Chro.20402	Membrane-bound
Chro.20403	Cytoplasmic
Chro.20404	Membrane-bound
Chro.20406	Cytoplasmic
Chro.20407	Cytoplasmic
Chro.20409	Cytoplasmic
Chro.20411	Cytoplasmic
Chro.20412	Cytoplasmic
Chro.20415	Cytoplasmic
Chro.20417	Cytoplasmic
Chro.20418	Membrane-bound
Chro.20419	Cytoplasmic
Chro.20420	Cytoplasmic
Chro.20421	Cytoplasmic
Chro.20422	Cytoplasmic
Chro.20423	Cytoplasmic
Chro.20424	Cytoplasmic
Chro.20426	Cytoplasmic
Chro.20427	Membrane-bound
Chro.20428	Cytoplasmic
Chro.20429	Membrane-bound
Chro.20430	Cytoplasmic
Chro.20431	Cytoplasmic
Chro.20432	Membrane-bound
Chro.20433	Membrane-bound
Chro.20434	Cytoplasmic
Chro.20435	Cytoplasmic
Chro.20436	Cytoplasmic
Chro.20437	Membrane-bound
Chro.20439	Cytoplasmic
Chro.20440	Cytoplasmic
Chro.20441	Cytoplasmic
Chro.20442	Cytoplasmic
Chro.20443	Membrane-bound
Chro.20444	Cytoplasmic
Chro.20445	Cytoplasmic
Chro.20446	Membrane-bound
Chro.20447	Cytoplasmic
Chro.20448	Cytoplasmic
Chro.20450	Membrane-bound
Chro.20451	Cytoplasmic
Chro.20452	Cytoplasmic
Chro.20455	Cytoplasmic
Chro.20456	Membrane-bound
Chro.20457	Cytoplasmic
Chro.20458	Cytoplasmic
Chro.20459	Membrane-bound
Chro.20460	Cytoplasmic
Chro.20461	Cytoplasmic
Chro.20462	Cytoplasmic
Chro.20463	Cytoplasmic
Chro.20464	Secreted
Chro.20465	Cytoplasmic
Chro.20466	Membrane-bound
Chro.20467	Cytoplasmic
Chro.20468	Secreted
Chro.30010	Membrane-bound
Chro.30011	Membrane-bound
Chro.30012	Membrane-bound
Chro.30013	Cytoplasmic
Chro.30014	Cytoplasmic
Chro.30015	Cytoplasmic
Chro.30016	Cytoplasmic
Chro.30017	Cytoplasmic
Chro.30018	Secreted
Chro.30019	Membrane-bound
Chro.30020	Secreted
Chro.30021	Cytoplasmic
Chro.30022	Cytoplasmic
Chro.30023	Cytoplasmic
Chro.30024	Cytoplasmic
Chro.30025	Cytoplasmic
Chro.30026	Cytoplasmic
Chro.30027	Membrane-bound
Chro.30028	Cytoplasmic
Chro.30029	Cytoplasmic
Chro.30031	Cytoplasmic
Chro.30032	Cytoplasmic
Chro.30033	Cytoplasmic
Chro.30034	Cytoplasmic
Chro.30037	Cytoplasmic
Chro.30038	Cytoplasmic
Chro.30039	Cytoplasmic
Chro.30041	Cytoplasmic
Chro.30042	Cytoplasmic
Chro.30043	Cytoplasmic
Chro.30045	Cytoplasmic
Chro.30046	Cytoplasmic
Chro.30047	Cytoplasmic
Chro.30048	Cytoplasmic
Chro.30049	Membrane-bound
Chro.30050	Membrane-bound
Chro.30052	Cytoplasmic
Chro.30053	Cytoplasmic
Chro.30055	Cytoplasmic
Chro.30056	Cytoplasmic
Chro.30057	Cytoplasmic
Chro.30058	Membrane-bound
Chro.30059	Cytoplasmic
Chro.30060	Cytoplasmic
Chro.30061	Membrane-bound
Chro.30062	Cytoplasmic
Chro.30063	Cytoplasmic
Chro.30064	Membrane-bound
Chro.30065	Membrane-bound
Chro.30069	Membrane-bound
Chro.30070	Membrane-bound
Chro.30071	Cytoplasmic
Chro.30072	Membrane-bound
Chro.30073	Membrane-bound
Chro.30074	Membrane-bound
Chro.30075	Secreted
Chro.30076	Membrane-bound
Chro.30077	Membrane-bound
Chro.30078	Secreted
Chro.30079	Membrane-bound
Chro.30081	Cytoplasmic
Chro.30082	Membrane-bound
Chro.30084	Cytoplasmic
Chro.30086	Secreted
Chro.30087	Secreted
Chro.30088	Membrane-bound
Chro.30090	Membrane-bound
Chro.30091	Secreted
Chro.30095	Cytoplasmic
Chro.30096	Membrane-bound
Chro.30101	Membrane-bound
Chro.30102	Membrane-bound
Chro.30103	Cytoplasmic
Chro.30104	Cytoplasmic
Chro.30105	Cytoplasmic
Chro.30106	Cytoplasmic
Chro.30107	Cytoplasmic
Chro.30108	Cytoplasmic
Chro.30109	Cytoplasmic
Chro.30110	Cytoplasmic
Chro.30111	Membrane-bound
Chro.30112	Cytoplasmic
Chro.30113	Cytoplasmic
Chro.30114	Cytoplasmic
Chro.30115	Cytoplasmic
Chro.30116	Cytoplasmic
Chro.30117	Cytoplasmic
Chro.30118	Cytoplasmic
Chro.30119	Cytoplasmic
Chro.30120	Cytoplasmic
Chro.30121	Cytoplasmic
Chro.30124	Cytoplasmic
Chro.30125	Cytoplasmic
Chro.30126	Cytoplasmic
Chro.30127	Membrane-bound
Chro.30128	Membrane-bound
Chro.30129	Membrane-bound
Chro.30130	Membrane-bound
Chro.30131	Membrane-bound
Chro.30132	Membrane-bound
Chro.30133	Cytoplasmic
Chro.30134	Cytoplasmic
Chro.30136	Cytoplasmic
Chro.30137	Cytoplasmic
Chro.30138	Cytoplasmic
Chro.30140	Cytoplasmic
Chro.30141	Membrane-bound
Chro.30142	Membrane-bound
Chro.30143	Cytoplasmic
Chro.30144	Membrane-bound
Chro.30145	Cytoplasmic
Chro.30146	Cytoplasmic
Chro.30147	Membrane-bound
Chro.30148	Cytoplasmic
Chro.30151	Cytoplasmic
Chro.30152	Cytoplasmic
Chro.30153	Membrane-bound
Chro.30154	Cytoplasmic
Chro.30155	Cytoplasmic
Chro.30156	Cytoplasmic
Chro.30157	Cytoplasmic
Chro.30158	Cytoplasmic
Chro.30159	Cytoplasmic
Chro.30160	Cytoplasmic
Chro.30161	Cytoplasmic
Chro.30162	Cytoplasmic
Chro.30163	Cytoplasmic
Chro.30164	Cytoplasmic
Chro.30165	Cytoplasmic
Chro.30166	Cytoplasmic
Chro.30167	Cytoplasmic
Chro.30168	Cytoplasmic
Chro.30169	Membrane-bound
Chro.30170	Cytoplasmic
Chro.30171	Cytoplasmic
Chro.30172	Cytoplasmic
Chro.30173	Cytoplasmic
Chro.30174	Cytoplasmic
Chro.30175	Cytoplasmic
Chro.30176	Cytoplasmic
Chro.30177	Cytoplasmic
Chro.30178	Membrane-bound
Chro.30180	Cytoplasmic
Chro.30181	Cytoplasmic
Chro.30182	Cytoplasmic
Chro.30183	Membrane-bound
Chro.30184	Cytoplasmic
Chro.30186	Cytoplasmic
Chro.30187	Cytoplasmic
Chro.30188	Cytoplasmic
Chro.30189	Cytoplasmic
Chro.30190	Cytoplasmic
Chro.30193	Cytoplasmic
Chro.30194	Membrane-bound
Chro.30195	Cytoplasmic
Chro.30196	Cytoplasmic
Chro.30197	Cytoplasmic
Chro.30198	Membrane-bound
Chro.30199	Cytoplasmic
Chro.30200	Membrane-bound
Chro.30201	Cytoplasmic
Chro.30202	Cytoplasmic
Chro.30203	Cytoplasmic
Chro.30204	Secreted
Chro.30205	Secreted
Chro.30206	Membrane-bound
Chro.30207	Membrane-bound
Chro.30208	Membrane-bound
Chro.30209	Secreted
Chro.30210	Membrane-bound
Chro.30211	Secreted
Chro.30212	Secreted
Chro.30213	Cytoplasmic
Chro.30214	Membrane-bound
Chro.30215	Cytoplasmic
Chro.30216	Cytoplasmic
Chro.30217	Membrane-bound
Chro.30218	Cytoplasmic
Chro.30219	Cytoplasmic
Chro.30220	Secreted
Chro.30221	Cytoplasmic
Chro.30222	Cytoplasmic
Chro.30223	Membrane-bound
Chro.30224	Membrane-bound
Chro.30225	Cytoplasmic
Chro.30226	Cytoplasmic
Chro.30227	Membrane-bound
Chro.30228	Cytoplasmic
Chro.30229	Cytoplasmic
Chro.30230	Cytoplasmic
Chro.30233	Cytoplasmic
Chro.30234	Cytoplasmic
Chro.30235	Cytoplasmic
Chro.30236	Cytoplasmic
Chro.30237	Membrane-bound
Chro.30238	Cytoplasmic
Chro.30240	Cytoplasmic
Chro.30241	Cytoplasmic
Chro.30242	Cytoplasmic
Chro.30243	Cytoplasmic
Chro.30244	Cytoplasmic
Chro.30245	Membrane-bound
Chro.30246	Cytoplasmic
Chro.30247	Cytoplasmic
Chro.30248	Cytoplasmic
Chro.30249	Cytoplasmic
Chro.30250	Secreted
Chro.30251	Cytoplasmic
Chro.30252	Membrane-bound
Chro.30253	Cytoplasmic
Chro.30254	Cytoplasmic
Chro.30255	Cytoplasmic
Chro.30259	Cytoplasmic
Chro.30260	Cytoplasmic
Chro.30261	Cytoplasmic
Chro.30262	Cytoplasmic
Chro.30263	Cytoplasmic
Chro.30264	Cytoplasmic
Chro.30265	Cytoplasmic
Chro.30266	Cytoplasmic
Chro.30267	Cytoplasmic
Chro.30268	Cytoplasmic
Chro.30269	Membrane-bound
Chro.30271	Membrane-bound
Chro.30272	Cytoplasmic
Chro.30274	Cytoplasmic
Chro.30275	Cytoplasmic
Chro.30276	Cytoplasmic
Chro.30277	Cytoplasmic
Chro.30278	Cytoplasmic
Chro.30279	Cytoplasmic
Chro.30280	Cytoplasmic
Chro.30281	Cytoplasmic
Chro.30282	Cytoplasmic
Chro.30283	Cytoplasmic
Chro.30284	Cytoplasmic
Chro.30285	Cytoplasmic
Chro.30286	Cytoplasmic
Chro.30287	Cytoplasmic
Chro.30288	Cytoplasmic
Chro.30289	Membrane-bound
Chro.30290	Cytoplasmic
Chro.30291	Cytoplasmic
Chro.30292	Cytoplasmic
Chro.30293	Cytoplasmic
Chro.30294	Cytoplasmic
Chro.30295	Cytoplasmic
Chro.30296	Cytoplasmic
Chro.30297	Cytoplasmic
Chro.30298	Cytoplasmic
Chro.30299	Cytoplasmic
Chro.30300	Cytoplasmic
Chro.30301	Cytoplasmic
Chro.30302	Cytoplasmic
Chro.30304	Membrane-bound
Chro.30305	Cytoplasmic
Chro.30306	Membrane-bound
Chro.30307	Membrane-bound
Chro.30308	Cytoplasmic
Chro.30309	Cytoplasmic
Chro.30311	Membrane-bound
Chro.30312	Cytoplasmic
Chro.30313	Cytoplasmic
Chro.30314	Cytoplasmic
Chro.30315	Cytoplasmic
Chro.30316	Membrane-bound
Chro.30317	Cytoplasmic
Chro.30318	Cytoplasmic
Chro.30319	Cytoplasmic
Chro.30320	Cytoplasmic
Chro.30321	Cytoplasmic
Chro.30322	Cytoplasmic
Chro.30323	Cytoplasmic
Chro.30324	Cytoplasmic
Chro.30325	Cytoplasmic
Chro.30327	Cytoplasmic
Chro.30328	Cytoplasmic
Chro.30329	Cytoplasmic
Chro.30330	Cytoplasmic
Chro.30331	Cytoplasmic
Chro.30332	Cytoplasmic
Chro.30333	Cytoplasmic
Chro.30334	Cytoplasmic
Chro.30335	Cytoplasmic
Chro.30337	Cytoplasmic
Chro.30338	Membrane-bound
Chro.30339	Membrane-bound
Chro.30340	Cytoplasmic
Chro.30341	Cytoplasmic
Chro.30342	Cytoplasmic
Chro.30343	Cytoplasmic
Chro.30344	Cytoplasmic
Chro.30345	Cytoplasmic
Chro.30346	Cytoplasmic
Chro.30347	Cytoplasmic
Chro.30349	Cytoplasmic
Chro.30350	Cytoplasmic
Chro.30351	Cytoplasmic
Chro.30352	Membrane-bound
Chro.30353	Cytoplasmic
Chro.30354	Membrane-bound
Chro.30355	Cytoplasmic
Chro.30356	Cytoplasmic
Chro.30357	Cytoplasmic
Chro.30358	Membrane-bound
Chro.30359	Cytoplasmic
Chro.30360	Cytoplasmic
Chro.30361	Cytoplasmic
Chro.30362	Cytoplasmic
Chro.30363	Cytoplasmic
Chro.30364	Cytoplasmic
Chro.30365	Cytoplasmic
Chro.30366	Cytoplasmic
Chro.30367	Cytoplasmic
Chro.30368	Cytoplasmic
Chro.30369	Cytoplasmic
Chro.30371	Cytoplasmic
Chro.30372	Cytoplasmic
Chro.30373	Cytoplasmic
Chro.30374	Cytoplasmic
Chro.30375	Membrane-bound
Chro.30376	Cytoplasmic
Chro.30377	Cytoplasmic
Chro.30378	Cytoplasmic
Chro.30379	Cytoplasmic
Chro.30380	Cytoplasmic
Chro.30381	Cytoplasmic
Chro.30382	Cytoplasmic
Chro.30383	Membrane-bound
Chro.30384	Cytoplasmic
Chro.30385	Membrane-bound
Chro.30386	Cytoplasmic
Chro.30387	Membrane-bound
Chro.30388	Secreted
Chro.30389	Cytoplasmic
Chro.30390	Cytoplasmic
Chro.30391	Cytoplasmic
Chro.30392	Cytoplasmic
Chro.30393	Cytoplasmic
Chro.30394	Cytoplasmic
Chro.30395	Cytoplasmic
Chro.30396	Cytoplasmic
Chro.30397	Membrane-bound
Chro.30398	Cytoplasmic
Chro.30399	Cytoplasmic
Chro.30400	Cytoplasmic
Chro.30401	Membrane-bound
Chro.30403	Cytoplasmic
Chro.30404	Cytoplasmic
Chro.30405	Cytoplasmic
Chro.30406	Membrane-bound
Chro.30407	Cytoplasmic
Chro.30408	Cytoplasmic
Chro.30409	Membrane-bound
Chro.30410	Cytoplasmic
Chro.30412	Membrane-bound
Chro.30413	Cytoplasmic
Chro.30414	Cytoplasmic
Chro.30416	Cytoplasmic
Chro.30417	Cytoplasmic
Chro.30420	Cytoplasmic
Chro.30421	Cytoplasmic
Chro.30422	Cytoplasmic
Chro.30423	Cytoplasmic
Chro.30424	Membrane-bound
Chro.30426	Cytoplasmic
Chro.30427	Cytoplasmic
Chro.30428	Cytoplasmic
Chro.30429	Cytoplasmic
Chro.30430	Cytoplasmic
Chro.30432	Cytoplasmic
Chro.30433	Cytoplasmic
Chro.30434	Membrane-bound
Chro.30435	Cytoplasmic
Chro.30436	Cytoplasmic
Chro.30437	Cytoplasmic
Chro.30440	Cytoplasmic
Chro.30441	Cytoplasmic
Chro.30442	Cytoplasmic
Chro.30443	Cytoplasmic
Chro.30444	Membrane-bound
Chro.30445	Cytoplasmic
Chro.30446	Cytoplasmic
Chro.30448	Cytoplasmic
Chro.30449	Cytoplasmic
Chro.30450	Cytoplasmic
Chro.30451	Cytoplasmic
Chro.30452	Cytoplasmic
Chro.30453	Cytoplasmic
Chro.30454	Membrane-bound
Chro.30455	Cytoplasmic
Chro.30456	Cytoplasmic
Chro.30457	Cytoplasmic
Chro.30458	Membrane-bound
Chro.30459	Cytoplasmic
Chro.30460	Cytoplasmic
Chro.30461	Cytoplasmic
Chro.30462	Cytoplasmic
Chro.30463	Cytoplasmic
Chro.30464	Cytoplasmic
Chro.30465	Membrane-bound
Chro.30466	Cytoplasmic
Chro.30467	Cytoplasmic
Chro.30468	Secreted
Chro.30469	Cytoplasmic
Chro.30470	Secreted
Chro.30474	Secreted
Chro.30475	Membrane-bound
Chro.30476	Secreted
Chro.30478	Cytoplasmic
Chro.30479	Cytoplasmic
Chro.30482	Cytoplasmic
Chro.30484	Cytoplasmic
Chro.30485	Membrane-bound
Chro.30486	Cytoplasmic
Chro.30487	Cytoplasmic
Chro.30488	Cytoplasmic
Chro.30489	Membrane-bound
Chro.30490	Secreted
Chro.30900	Cytoplasmic
Chro.40010	Membrane-bound
Chro.40012	Secreted
Chro.40013	Membrane-bound
Chro.40014	Cytoplasmic
Chro.40015	Cytoplasmic
Chro.40016	Cytoplasmic
Chro.40017	Cytoplasmic
Chro.40018	Cytoplasmic
Chro.40019	Membrane-bound
Chro.40020	Cytoplasmic
Chro.40021	Membrane-bound
Chro.40024	Cytoplasmic
Chro.40025	Cytoplasmic
Chro.40027	Cytoplasmic
Chro.40028	Cytoplasmic
Chro.40029	Cytoplasmic
Chro.40030	Membrane-bound
Chro.40031	Cytoplasmic
Chro.40032	Cytoplasmic
Chro.40033	Cytoplasmic
Chro.40034	Cytoplasmic
Chro.40035	Cytoplasmic
Chro.40036	Cytoplasmic
Chro.40037	Cytoplasmic
Chro.40038	Cytoplasmic
Chro.40039	Cytoplasmic
Chro.40040	Secreted
Chro.40041	Cytoplasmic
Chro.40042	Membrane-bound
Chro.40044	Cytoplasmic
Chro.40045	Cytoplasmic
Chro.40046	Cytoplasmic
Chro.40047	Cytoplasmic
Chro.40048	Cytoplasmic
Chro.40049	Membrane-bound
Chro.40050	Cytoplasmic
Chro.40051	Cytoplasmic
Chro.40052	Membrane-bound
Chro.40053	Membrane-bound
Chro.40054	Cytoplasmic
Chro.40055	Cytoplasmic
Chro.40056	Membrane-bound
Chro.40057	Cytoplasmic
Chro.40058	Cytoplasmic
Chro.40060	Cytoplasmic
Chro.40061	Cytoplasmic
Chro.40062	Cytoplasmic
Chro.40063	Cytoplasmic
Chro.40064	Cytoplasmic
Chro.40066	Cytoplasmic
Chro.40067	Cytoplasmic
Chro.40068	Cytoplasmic
Chro.40069	Cytoplasmic
Chro.40070	Cytoplasmic
Chro.40071	Cytoplasmic
Chro.40072	Cytoplasmic
Chro.40073	Cytoplasmic
Chro.40074	Cytoplasmic
Chro.40075	Cytoplasmic
Chro.40076	Cytoplasmic
Chro.40077	Cytoplasmic
Chro.40078	Cytoplasmic
Chro.40079	Cytoplasmic
Chro.40080	Cytoplasmic
Chro.40082	Cytoplasmic
Chro.40084	Cytoplasmic
Chro.40085	Cytoplasmic
Chro.40086	Cytoplasmic
Chro.40087	Cytoplasmic
Chro.40088	Cytoplasmic
Chro.40089	Cytoplasmic
Chro.40090	Cytoplasmic
Chro.40091	Cytoplasmic
Chro.40092	Cytoplasmic
Chro.40093	Cytoplasmic
Chro.40094	Secreted
Chro.40095	Cytoplasmic
Chro.40097	Cytoplasmic
Chro.40098	Cytoplasmic
Chro.40099	Membrane-bound
Chro.40100	Cytoplasmic
Chro.40101	Cytoplasmic
Chro.40102	Cytoplasmic
Chro.40103	Cytoplasmic
Chro.40104	Cytoplasmic
Chro.40105	Cytoplasmic
Chro.40106	Membrane-bound
Chro.40107	Cytoplasmic
Chro.40109	Cytoplasmic
Chro.40110	Secreted
Chro.40111	Cytoplasmic
Chro.40112	Cytoplasmic
Chro.40113	Cytoplasmic
Chro.40114	Cytoplasmic
Chro.40115	Cytoplasmic
Chro.40117	Cytoplasmic
Chro.40118	Membrane-bound
Chro.40119	Cytoplasmic
Chro.40121	Cytoplasmic
Chro.40122	Cytoplasmic
Chro.40123	Cytoplasmic
Chro.40124	Cytoplasmic
Chro.40126	Cytoplasmic
Chro.40127	Cytoplasmic
Chro.40128	Cytoplasmic
Chro.40129	Cytoplasmic
Chro.40131	Cytoplasmic
Chro.40132	Membrane-bound
Chro.40135	Cytoplasmic
Chro.40136	Cytoplasmic
Chro.40137	Membrane-bound
Chro.40138	Cytoplasmic
Chro.40139	Membrane-bound
Chro.40140	Cytoplasmic
Chro.40141	Cytoplasmic
Chro.40142	Cytoplasmic
Chro.40143	Cytoplasmic
Chro.40144	Cytoplasmic
Chro.40145	Cytoplasmic
Chro.40146	Cytoplasmic
Chro.40147	Cytoplasmic
Chro.40148	Cytoplasmic
Chro.40149	Membrane-bound
Chro.40150	Membrane-bound
Chro.40151	Membrane-bound
Chro.40153	Cytoplasmic
Chro.40154	Secreted
Chro.40155	Membrane-bound
Chro.40156	Membrane-bound
Chro.40157	Membrane-bound
Chro.40158	Membrane-bound
Chro.40159	Cytoplasmic
Chro.40160	Cytoplasmic
Chro.40162	Cytoplasmic
Chro.40163	Cytoplasmic
Chro.40164	Cytoplasmic
Chro.40165	Membrane-bound
Chro.40166	Membrane-bound
Chro.40167	Membrane-bound
Chro.40169	Cytoplasmic
Chro.40170	Cytoplasmic
Chro.40174	Cytoplasmic
Chro.40175	Cytoplasmic
Chro.40177	Cytoplasmic
Chro.40178	Membrane-bound
Chro.40179	Cytoplasmic
Chro.40181	Cytoplasmic
Chro.40182	Cytoplasmic
Chro.40183	Cytoplasmic
Chro.40184	Cytoplasmic
Chro.40185	Cytoplasmic
Chro.40186	Cytoplasmic
Chro.40187	Cytoplasmic
Chro.40188	Cytoplasmic
Chro.40189	Membrane-bound
Chro.40190	Membrane-bound
Chro.40191	Cytoplasmic
Chro.40193	Cytoplasmic
Chro.40194	Cytoplasmic
Chro.40195	Cytoplasmic
Chro.40196	Cytoplasmic
Chro.40200	Membrane-bound
Chro.40201	Cytoplasmic
Chro.40203	Membrane-bound
Chro.40204	Cytoplasmic
Chro.40205	Cytoplasmic
Chro.40206	Cytoplasmic
Chro.40207	Cytoplasmic
Chro.40208	Cytoplasmic
Chro.40209	Membrane-bound
Chro.40210	Cytoplasmic
Chro.40212	Cytoplasmic
Chro.40214	Cytoplasmic
Chro.40215	Cytoplasmic
Chro.40216	Membrane-bound
Chro.40217	Cytoplasmic
Chro.40218	Cytoplasmic
Chro.40219	Cytoplasmic
Chro.40220	Cytoplasmic
Chro.40221	Cytoplasmic
Chro.40222	Membrane-bound
Chro.40223	Cytoplasmic
Chro.40224	Cytoplasmic
Chro.40225	Cytoplasmic
Chro.40226	Cytoplasmic
Chro.40227	Cytoplasmic
Chro.40229	Membrane-bound
Chro.40230	Cytoplasmic
Chro.40231	Cytoplasmic
Chro.40232	Cytoplasmic
Chro.40233	Membrane-bound
Chro.40234	Cytoplasmic
Chro.40235	Cytoplasmic
Chro.40236	Cytoplasmic
Chro.40238	Cytoplasmic
Chro.40239	Secreted
Chro.40240	Cytoplasmic
Chro.40241	Cytoplasmic
Chro.40243	Cytoplasmic
Chro.40244	Cytoplasmic
Chro.40245	Cytoplasmic
Chro.40246	Cytoplasmic
Chro.40247	Cytoplasmic
Chro.40248	Membrane-bound
Chro.40249	Membrane-bound
Chro.40250	Cytoplasmic
Chro.40252	Cytoplasmic
Chro.40253	Cytoplasmic
Chro.40254	Cytoplasmic
Chro.40255	Cytoplasmic
Chro.40256	Cytoplasmic
Chro.40257	Cytoplasmic
Chro.40258	Membrane-bound
Chro.40259	Cytoplasmic
Chro.40260	Cytoplasmic
Chro.40261	Cytoplasmic
Chro.40262	Cytoplasmic
Chro.40263	Membrane-bound
Chro.40264	Membrane-bound
Chro.40265	Membrane-bound
Chro.40266	Cytoplasmic
Chro.40267	Cytoplasmic
Chro.40268	Cytoplasmic
Chro.40269	Cytoplasmic
Chro.40270	Cytoplasmic
Chro.40271	Cytoplasmic
Chro.40272	Membrane-bound
Chro.40273	Membrane-bound
Chro.40274	Membrane-bound
Chro.40275	Cytoplasmic
Chro.40276	Secreted
Chro.40277	Cytoplasmic
Chro.40278	Secreted
Chro.40279	Membrane-bound
Chro.40280	Membrane-bound
Chro.40281	Cytoplasmic
Chro.40282	Secreted
Chro.40283	Membrane-bound
Chro.40284	Cytoplasmic
Chro.40285	Cytoplasmic
Chro.40286	Cytoplasmic
Chro.40288	Cytoplasmic
Chro.40289	Cytoplasmic
Chro.40290	Cytoplasmic
Chro.40291	Cytoplasmic
Chro.40292	Cytoplasmic
Chro.40293	Cytoplasmic
Chro.40294	Cytoplasmic
Chro.40295	Cytoplasmic
Chro.40296	Cytoplasmic
Chro.40297	Cytoplasmic
Chro.40298	Cytoplasmic
Chro.40301	Cytoplasmic
Chro.40302	Membrane-bound
Chro.40303	Cytoplasmic
Chro.40304	Cytoplasmic
Chro.40305	Cytoplasmic
Chro.40306	Membrane-bound
Chro.40307	Cytoplasmic
Chro.40308	Cytoplasmic
Chro.40309	Cytoplasmic
Chro.40310	Cytoplasmic
Chro.40312	Membrane-bound
Chro.40313	Secreted
Chro.40314	Membrane-bound
Chro.40315	Membrane-bound
Chro.40316	Secreted
Chro.40317	Cytoplasmic
Chro.40319	Cytoplasmic
Chro.40320	Cytoplasmic
Chro.40321	Membrane-bound
Chro.40322	Cytoplasmic
Chro.40323	Membrane-bound
Chro.40324	Cytoplasmic
Chro.40325	Membrane-bound
Chro.40331	Cytoplasmic
Chro.40332	Cytoplasmic
Chro.40334	Cytoplasmic
Chro.40336	Cytoplasmic
Chro.40337	Cytoplasmic
Chro.40338	Cytoplasmic
Chro.40339	Cytoplasmic
Chro.40340	Cytoplasmic
Chro.40341	Cytoplasmic
Chro.40342	Cytoplasmic
Chro.40343	Cytoplasmic
Chro.40344	Secreted
Chro.40345	Secreted
Chro.40346	Cytoplasmic
Chro.40347	Cytoplasmic
Chro.40349	Membrane-bound
Chro.40350	Cytoplasmic
Chro.40351	Secreted
Chro.40352	Cytoplasmic
Chro.40354	Membrane-bound
Chro.40356	Membrane-bound
Chro.40357	Cytoplasmic
Chro.40358	Cytoplasmic
Chro.40359	Cytoplasmic
Chro.40360	Cytoplasmic
Chro.40361	Cytoplasmic
Chro.40362	Cytoplasmic
Chro.40363	Cytoplasmic
Chro.40364	Cytoplasmic
Chro.40365	Cytoplasmic
Chro.40366	Cytoplasmic
Chro.40367	Secreted
Chro.40368	Cytoplasmic
Chro.40369	Cytoplasmic
Chro.40370	Cytoplasmic
Chro.40371	Cytoplasmic
Chro.40372	Cytoplasmic
Chro.40373	Cytoplasmic
Chro.40374	Cytoplasmic
Chro.40375	Cytoplasmic
Chro.40376	Cytoplasmic
Chro.40377	Cytoplasmic
Chro.40378	Cytoplasmic
Chro.40379	Cytoplasmic
Chro.40380	Cytoplasmic
Chro.40381	Cytoplasmic
Chro.40382	Cytoplasmic
Chro.40383	Cytoplasmic
Chro.40384	Cytoplasmic
Chro.40385	Cytoplasmic
Chro.40386	Cytoplasmic
Chro.40387	Cytoplasmic
Chro.40389	Cytoplasmic
Chro.40391	Cytoplasmic
Chro.40392	Membrane-bound
Chro.40393	Cytoplasmic
Chro.40395	Secreted
Chro.40396	Membrane-bound
Chro.40397	Membrane-bound
Chro.40398	Cytoplasmic
Chro.40399	Cytoplasmic
Chro.40400	Secreted
Chro.40401	Cytoplasmic
Chro.40402	Cytoplasmic
Chro.40403	Cytoplasmic
Chro.40404	Secreted
Chro.40405	Membrane-bound
Chro.40407	Cytoplasmic
Chro.40408	Cytoplasmic
Chro.40409	Secreted
Chro.40410	Membrane-bound
Chro.40411	Cytoplasmic
Chro.40412	Membrane-bound
Chro.40414	Cytoplasmic
Chro.40415	Membrane-bound
Chro.40416	Cytoplasmic
Chro.40417	Secreted
Chro.40418	Cytoplasmic
Chro.40419	Membrane-bound
Chro.40420	Cytoplasmic
Chro.40421	Cytoplasmic
Chro.40422	Cytoplasmic
Chro.40423	Cytoplasmic
Chro.40424	Cytoplasmic
Chro.40426	Cytoplasmic
Chro.40427	Cytoplasmic
Chro.40428	Cytoplasmic
Chro.40429	Cytoplasmic
Chro.40430	Cytoplasmic
Chro.40431	Cytoplasmic
Chro.40432	Cytoplasmic
Chro.40433	Cytoplasmic
Chro.40434	Cytoplasmic
Chro.40435	Cytoplasmic
Chro.40436	Membrane-bound
Chro.40437	Membrane-bound
Chro.40439	Cytoplasmic
Chro.40440	Cytoplasmic
Chro.40442	Cytoplasmic
Chro.40444	Cytoplasmic
Chro.40445	Cytoplasmic
Chro.40446	Cytoplasmic
Chro.40447	Cytoplasmic
Chro.40448	Membrane-bound
Chro.40450	Cytoplasmic
Chro.40451	Cytoplasmic
Chro.40452	Cytoplasmic
Chro.40453	Cytoplasmic
Chro.40454	Membrane-bound
Chro.40455	Cytoplasmic
Chro.40458	Cytoplasmic
Chro.40460	Cytoplasmic
Chro.40461	Cytoplasmic
Chro.40462	Cytoplasmic
Chro.40463	Membrane-bound
Chro.40464	Secreted
Chro.40465	Cytoplasmic
Chro.40468	Membrane-bound
Chro.40469	Cytoplasmic
Chro.40470	Cytoplasmic
Chro.40471	Cytoplasmic
Chro.40476	Membrane-bound
Chro.40477	Membrane-bound
Chro.40479	Cytoplasmic
Chro.40480	Membrane-bound
Chro.40481	Cytoplasmic
Chro.40482	Cytoplasmic
Chro.40483	Membrane-bound
Chro.40484	Cytoplasmic
Chro.40485	Cytoplasmic
Chro.40486	Secreted
Chro.40487	Cytoplasmic
Chro.40488	Cytoplasmic
Chro.40489	Cytoplasmic
Chro.40490	Cytoplasmic
Chro.40491	Cytoplasmic
Chro.40492	Cytoplasmic
Chro.40493	Cytoplasmic
Chro.40494	Cytoplasmic
Chro.40495	Cytoplasmic
Chro.40496	Cytoplasmic
Chro.40497	Secreted
Chro.40498	Cytoplasmic
Chro.40499	Cytoplasmic
Chro.40500	Cytoplasmic
Chro.40501	Cytoplasmic
Chro.40502	Cytoplasmic
Chro.40503	Membrane-bound
Chro.40505	Membrane-bound
Chro.40506	Membrane-bound
Chro.40507	Membrane-bound
Chro.40508	Membrane-bound
Chro.40510	Cytoplasmic
Chro.40511	Cytoplasmic
Chro.40900	Cytoplasmic
Chro.50010	Cytoplasmic
Chro.50012	Membrane-bound
Chro.50013	Membrane-bound
Chro.50014	Membrane-bound
Chro.50015	Secreted
Chro.50016	Cytoplasmic
Chro.50017	Cytoplasmic
Chro.50018	Cytoplasmic
Chro.50019	Cytoplasmic
Chro.50020	Secreted
Chro.50021	Cytoplasmic
Chro.50022	Membrane-bound
Chro.50023	Membrane-bound
Chro.50024	Cytoplasmic
Chro.50025	Cytoplasmic
Chro.50026	Cytoplasmic
Chro.50027	Cytoplasmic
Chro.50028	Membrane-bound
Chro.50029	Membrane-bound
Chro.50030	Membrane-bound
Chro.50031	Cytoplasmic
Chro.50032	Cytoplasmic
Chro.50033	Cytoplasmic
Chro.50034	Membrane-bound
Chro.50036	Cytoplasmic
Chro.50037	Cytoplasmic
Chro.50038	Cytoplasmic
Chro.50039	Cytoplasmic
Chro.50040	Membrane-bound
Chro.50041	Cytoplasmic
Chro.50042	Cytoplasmic
Chro.50043	Cytoplasmic
Chro.50045	Cytoplasmic
Chro.50046	Cytoplasmic
Chro.50047	Cytoplasmic
Chro.50048	Cytoplasmic
Chro.50049	Cytoplasmic
Chro.50050	Cytoplasmic
Chro.50051	Cytoplasmic
Chro.50052	Cytoplasmic
Chro.50053	Cytoplasmic
Chro.50054	Cytoplasmic
Chro.50055	Cytoplasmic
Chro.50056	Cytoplasmic
Chro.50057	Cytoplasmic
Chro.50058	Membrane-bound
Chro.50061	Cytoplasmic
Chro.50062	Cytoplasmic
Chro.50063	Cytoplasmic
Chro.50064	Cytoplasmic
Chro.50065	Cytoplasmic
Chro.50066	Secreted
Chro.50067	Cytoplasmic
Chro.50068	Cytoplasmic
Chro.50069	Cytoplasmic
Chro.50070	Cytoplasmic
Chro.50071	Cytoplasmic
Chro.50072	Cytoplasmic
Chro.50073	Cytoplasmic
Chro.50074	Membrane-bound
Chro.50075	Cytoplasmic
Chro.50077	Cytoplasmic
Chro.50078	Cytoplasmic
Chro.50079	Cytoplasmic
Chro.50080	Cytoplasmic
Chro.50081	Cytoplasmic
Chro.50083	Cytoplasmic
Chro.50084	Cytoplasmic
Chro.50085	Cytoplasmic
Chro.50086	Cytoplasmic
Chro.50088	Cytoplasmic
Chro.50089	Cytoplasmic
Chro.50090	Cytoplasmic
Chro.50091	Cytoplasmic
Chro.50092	Cytoplasmic
Chro.50093	Secreted
Chro.50094	Cytoplasmic
Chro.50095	Cytoplasmic
Chro.50096	Cytoplasmic
Chro.50097	Cytoplasmic
Chro.50098	Cytoplasmic
Chro.50100	Cytoplasmic
Chro.50101	Secreted
Chro.50102	Membrane-bound
Chro.50103	Cytoplasmic
Chro.50105	Cytoplasmic
Chro.50106	Cytoplasmic
Chro.50107	Membrane-bound
Chro.50108	Membrane-bound
Chro.50109	Membrane-bound
Chro.50110	Cytoplasmic
Chro.50111	Cytoplasmic
Chro.50112	Cytoplasmic
Chro.50113	Cytoplasmic
Chro.50114	Cytoplasmic
Chro.50115	Cytoplasmic
Chro.50116	Cytoplasmic
Chro.50118	Membrane-bound
Chro.50120	Membrane-bound
Chro.50121	Cytoplasmic
Chro.50122	Cytoplasmic
Chro.50123	Cytoplasmic
Chro.50124	Cytoplasmic
Chro.50125	Membrane-bound
Chro.50126	Membrane-bound
Chro.50127	Cytoplasmic
Chro.50128	Cytoplasmic
Chro.50129	Membrane-bound
Chro.50130	Cytoplasmic
Chro.50131	Cytoplasmic
Chro.50132	Cytoplasmic
Chro.50133	Cytoplasmic
Chro.50134	Cytoplasmic
Chro.50136	Cytoplasmic
Chro.50137	Membrane-bound
Chro.50138	Cytoplasmic
Chro.50139	Cytoplasmic
Chro.50140	Cytoplasmic
Chro.50141	Cytoplasmic
Chro.50142	Cytoplasmic
Chro.50143	Cytoplasmic
Chro.50144	Cytoplasmic
Chro.50145	Cytoplasmic
Chro.50146	Cytoplasmic
Chro.50147	Membrane-bound
Chro.50148	Cytoplasmic
Chro.50149	Membrane-bound
Chro.50150	Membrane-bound
Chro.50152	Cytoplasmic
Chro.50155	Cytoplasmic
Chro.50156	Membrane-bound
Chro.50157	Membrane-bound
Chro.50158	Cytoplasmic
Chro.50159	Cytoplasmic
Chro.50160	Cytoplasmic
Chro.50161	Secreted
Chro.50162	Cytoplasmic
Chro.50163	Cytoplasmic
Chro.50164	Membrane-bound
Chro.50165	Cytoplasmic
Chro.50166	Cytoplasmic
Chro.50167	Cytoplasmic
Chro.50168	Cytoplasmic
Chro.50169	Cytoplasmic
Chro.50170	Cytoplasmic
Chro.50171	Cytoplasmic
Chro.50172	Cytoplasmic
Chro.50173	Secreted
Chro.50174	Cytoplasmic
Chro.50175	Cytoplasmic
Chro.50176	Cytoplasmic
Chro.50177	Cytoplasmic
Chro.50178	Cytoplasmic
Chro.50179	Cytoplasmic
Chro.50180	Cytoplasmic
Chro.50181	Membrane-bound
Chro.50182	Cytoplasmic
Chro.50183	Cytoplasmic
Chro.50184	Cytoplasmic
Chro.50185	Membrane-bound
Chro.50186	Cytoplasmic
Chro.50187	Cytoplasmic
Chro.50188	Cytoplasmic
Chro.50189	Cytoplasmic
Chro.50190	Cytoplasmic
Chro.50191	Cytoplasmic
Chro.50192	Cytoplasmic
Chro.50193	Cytoplasmic
Chro.50194	Membrane-bound
Chro.50195	Cytoplasmic
Chro.50196	Membrane-bound
Chro.50197	Cytoplasmic
Chro.50198	Cytoplasmic
Chro.50200	Cytoplasmic
Chro.50201	Cytoplasmic
Chro.50202	Cytoplasmic
Chro.50203	Cytoplasmic
Chro.50204	Cytoplasmic
Chro.50205	Cytoplasmic
Chro.50206	Cytoplasmic
Chro.50207	Cytoplasmic
Chro.50208	Cytoplasmic
Chro.50209	Cytoplasmic
Chro.50210	Cytoplasmic
Chro.50211	Cytoplasmic
Chro.50212	Cytoplasmic
Chro.50213	Cytoplasmic
Chro.50214	Cytoplasmic
Chro.50215	Cytoplasmic
Chro.50216	Cytoplasmic
Chro.50217	Secreted
Chro.50218	Cytoplasmic
Chro.50219	Cytoplasmic
Chro.50220	Membrane-bound
Chro.50221	Cytoplasmic
Chro.50222	Cytoplasmic
Chro.50223	Cytoplasmic
Chro.50224	Cytoplasmic
Chro.50225	Cytoplasmic
Chro.50226	Cytoplasmic
Chro.50227	Membrane-bound
Chro.50228	Membrane-bound
Chro.50230	Secreted
Chro.50231	Secreted
Chro.50232	Cytoplasmic
Chro.50233	Cytoplasmic
Chro.50234	Membrane-bound
Chro.50235	Membrane-bound
Chro.50236	Membrane-bound
Chro.50237	Secreted
Chro.50238	Secreted
Chro.50239	Secreted
Chro.50240	Secreted
Chro.50241	Cytoplasmic
Chro.50242	Cytoplasmic
Chro.50243	Cytoplasmic
Chro.50244	Cytoplasmic
Chro.50245	Cytoplasmic
Chro.50246	Cytoplasmic
Chro.50247	Membrane-bound
Chro.50248	Cytoplasmic
Chro.50250	Membrane-bound
Chro.50251	Cytoplasmic
Chro.50252	Cytoplasmic
Chro.50253	Secreted
Chro.50254	Membrane-bound
Chro.50255	Cytoplasmic
Chro.50256	Cytoplasmic
Chro.50257	Membrane-bound
Chro.50258	Membrane-bound
Chro.50259	Membrane-bound
Chro.50260	Cytoplasmic
Chro.50261	Cytoplasmic
Chro.50263	Cytoplasmic
Chro.50264	Cytoplasmic
Chro.50265	Cytoplasmic
Chro.50266	Cytoplasmic
Chro.50267	Cytoplasmic
Chro.50268	Cytoplasmic
Chro.50269	Cytoplasmic
Chro.50270	Cytoplasmic
Chro.50271	Cytoplasmic
Chro.50272	Cytoplasmic
Chro.50273	Cytoplasmic
Chro.50274	Cytoplasmic
Chro.50275	Cytoplasmic
Chro.50276	Cytoplasmic
Chro.50278	Membrane-bound
Chro.50279	Cytoplasmic
Chro.50280	Cytoplasmic
Chro.50281	Cytoplasmic
Chro.50282	Cytoplasmic
Chro.50283	Cytoplasmic
Chro.50284	Cytoplasmic
Chro.50285	Membrane-bound
Chro.50286	Cytoplasmic
Chro.50288	Cytoplasmic
Chro.50289	Cytoplasmic
Chro.50290	Cytoplasmic
Chro.50291	Cytoplasmic
Chro.50292	Cytoplasmic
Chro.50293	Cytoplasmic
Chro.50294	Cytoplasmic
Chro.50295	Cytoplasmic
Chro.50296	Cytoplasmic
Chro.50297	Cytoplasmic
Chro.50298	Cytoplasmic
Chro.50299	Cytoplasmic
Chro.50300	Cytoplasmic
Chro.50301	Cytoplasmic
Chro.50302	Cytoplasmic
Chro.50303	Cytoplasmic
Chro.50304	Membrane-bound
Chro.50305	Cytoplasmic
Chro.50306	Cytoplasmic
Chro.50308	Membrane-bound
Chro.50309	Membrane-bound
Chro.50310	Cytoplasmic
Chro.50311	Cytoplasmic
Chro.50312	Cytoplasmic
Chro.50313	Cytoplasmic
Chro.50314	Cytoplasmic
Chro.50315	Cytoplasmic
Chro.50316	Cytoplasmic
Chro.50317	Cytoplasmic
Chro.50318	Cytoplasmic
Chro.50319	Cytoplasmic
Chro.50320	Membrane-bound
Chro.50321	Cytoplasmic
Chro.50322	Membrane-bound
Chro.50323	Cytoplasmic
Chro.50324	Cytoplasmic
Chro.50325	Membrane-bound
Chro.50326	Cytoplasmic
Chro.50327	Cytoplasmic
Chro.50328	Cytoplasmic
Chro.50329	Cytoplasmic
Chro.50330	Cytoplasmic
Chro.50331	Cytoplasmic
Chro.50334	Cytoplasmic
Chro.50335	Membrane-bound
Chro.50336	Cytoplasmic
Chro.50337	Cytoplasmic
Chro.50338	Cytoplasmic
Chro.50339	Cytoplasmic
Chro.50340	Cytoplasmic
Chro.50341	Cytoplasmic
Chro.50342	Cytoplasmic
Chro.50343	Cytoplasmic
Chro.50344	Cytoplasmic
Chro.50345	Cytoplasmic
Chro.50347	Cytoplasmic
Chro.50348	Cytoplasmic
Chro.50350	Cytoplasmic
Chro.50351	Cytoplasmic
Chro.50352	Cytoplasmic
Chro.50353	Cytoplasmic
Chro.50354	Cytoplasmic
Chro.50355	Cytoplasmic
Chro.50356	Cytoplasmic
Chro.50357	Membrane-bound
Chro.50358	Cytoplasmic
Chro.50362	Membrane-bound
Chro.50363	Cytoplasmic
Chro.50371	Cytoplasmic
Chro.50372	Cytoplasmic
Chro.50373	Cytoplasmic
Chro.50374	Cytoplasmic
Chro.50378	Membrane-bound
Chro.50379	Cytoplasmic
Chro.50380	Membrane-bound
Chro.50381	Cytoplasmic
Chro.50383	Cytoplasmic
Chro.50384	Cytoplasmic
Chro.50385	Cytoplasmic
Chro.50386	Cytoplasmic
Chro.50387	Cytoplasmic
Chro.50388	Cytoplasmic
Chro.50389	Cytoplasmic
Chro.50390	Cytoplasmic
Chro.50391	Cytoplasmic
Chro.50392	Membrane-bound
Chro.50394	Membrane-bound
Chro.50395	Secreted
Chro.50397	Cytoplasmic
Chro.50398	Cytoplasmic
Chro.50399	Cytoplasmic
Chro.50400	Cytoplasmic
Chro.50401	Cytoplasmic
Chro.50402	Cytoplasmic
Chro.50403	Cytoplasmic
Chro.50404	Cytoplasmic
Chro.50405	Cytoplasmic
Chro.50406	Cytoplasmic
Chro.50407	Cytoplasmic
Chro.50408	Cytoplasmic
Chro.50409	Cytoplasmic
Chro.50410	Cytoplasmic
Chro.50411	Membrane-bound
Chro.50412	Membrane-bound
Chro.50413	Cytoplasmic
[truncated: 1,682 more rows]
