# Supplementary figures and images for: Comparative Genomics ofCryptosporidium
Source: Hindawi journal article supplement (doi:10.1155/2013/832756), 2013-01-01

## Genome compactness

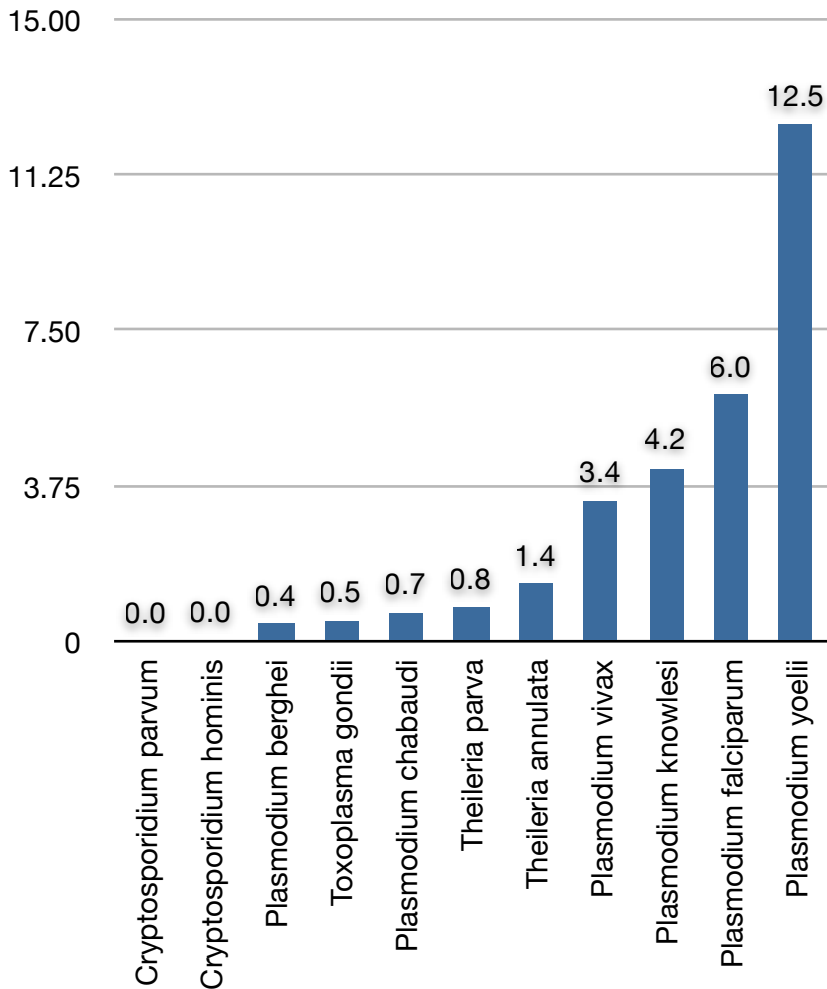

Supplement: f1 [file 832756.f1.zip]
